# Supplementary material for: The causal relationship between genetically predicted blood metabolites and idiopathic pulmonary fibrosis: A bidirectional two-sample Mendelian randomization study
Source: PLoS One. 2024 Apr 16;19(4):e0300423. doi: 10.1371/journal.pone.0300423 (PMC11020755; doi:10.1371/journal.pone.0300423)
Supplement: S5 Table — (XLSX) [file pone.0300423.s011.xlsx]

## Sheet: Sheet1
Supplementary Table 5: Characteristics of the genetic IVs used in TSMR analysis for the effect of blood metabolites on IPF risk (P < 1.00E-05, IPF GWAS from Zhou et al.)
	SNP	effect_allele.exposure	other_allele.exposure	effect_allele.outcome	other_allele.outcome	exposure	outcome	beta.exposure	beta.outcome	eaf.exposure	eaf.outcome	se.exposure	se.outcome	pval.exposure	pval.outcome	samplesize.exposure	samplesize.outcome	R2	F
1	rs11596604	A	G	A	G	M00053.metal.pos.txt.gz	IPF	0.0323	-0.071116	0.0236	0.05758	0.0069	0.041298	2.515e-06	0.08506	1768	953873	0.0122426	21.8885
2	rs16977047	T	C	T	C	M00053.metal.pos.txt.gz	IPF	-0.0056	-0.0074176	0.7034	0.7188	0.0011	0.0207	1.078e-06	0.7201	7372	953873	0.00350333	25.9103
3	rs2657879	A	G	A	G	M00053.metal.pos.txt.gz	IPF	0.015	0.018875	0.8179	0.8198	0.0017	0.023949	6.147e-18	0.4306	7372	953873	0.0104505	77.8335
4	rs2748991	T	C	T	C	M00053.metal.pos.txt.gz	IPF	-0.007	0.010585	0.446	0.4845	0.0015	0.018795	2.342e-06	0.5733	5604	953873	0.00387107	21.77
5	rs7078003	T	C	T	C	M00053.metal.pos.txt.gz	IPF	0.0087	-0.004504	0.1654	0.1919	0.0018	0.024357	1.838e-06	0.8533	7372	953873	0.00315889	23.3548
6	rs7394051	T	C	T	C	M00053.metal.pos.txt.gz	IPF	0.0055	0.026498	0.7014	0.7336	0.0012	0.022427	2.175e-06	0.2374	7372	937232	0.00284146	21.0012
7	rs780093	T	C	T	C	M00053.metal.pos.txt.gz	IPF	-0.0058	0.0031737	0.3995	0.3766	0.0011	0.019175	1.931e-07	0.8685	7372	953873	0.00375708	27.7941
13	rs1000137	T	C	T	C	M00054.metal.pos.txt.gz	IPF	-0.005	-0.013202	0.475	0.4814	0.001	0.018577	5.733e-07	0.4773	5592	953873	0.00445077	24.9911
14	rs1013667	A	G	A	G	M00054.metal.pos.txt.gz	IPF	-0.0041	-0.016497	0.6087	0.6138	0.0009	0.019046	5.673e-06	0.3864	7355	953873	0.00281369	20.7474
15	rs1016522	A	G	A	G	M00054.metal.pos.txt.gz	IPF	0.0058	-0.0093213	0.5803	0.5788	0.0009	0.018922	1.589e-10	0.6223	7355	953873	0.00561491	41.5196
16	rs10225863	T	C	T	C	M00054.metal.pos.txt.gz	IPF	-0.004	-0.040684	0.3949	0.4186	0.0009	0.019043	9.754e-06	0.03265	7355	953873	0.00267847	19.7477
17	rs10495209	T	C	T	C	M00054.metal.pos.txt.gz	IPF	0.004	0.0042649	0.4862	0.4988	0.0009	0.0188	8.02e-06	0.8205	7355	953873	0.00267847	19.7477
18	rs10807322	A	T	A	T	M00054.metal.pos.txt.gz	IPF	0.0043	-0.027023	0.5866	0.5866	0.0009	0.018963	1.974e-06	0.1541	7355	953873	0.00309402	22.821
19	rs10836364	T	C	T	C	M00054.metal.pos.txt.gz	IPF	0.005	-0.0064359	0.607	0.6125	0.001	0.019108	5.733e-07	0.7362	5592	953873	0.00445077	24.9911
20	rs10846667	T	C	T	C	M00054.metal.pos.txt.gz	IPF	0.0045	0.0029118	0.4861	0.4996	0.0009	0.018809	1.651e-06	0.877	7355	953873	0.00338753	24.9932
21	rs10900784	A	C	A	C	M00054.metal.pos.txt.gz	IPF	-0.0044	0.006805	0.4158	0.4016	0.0009	0.018987	9.744e-07	0.72	7355	953873	0.00323913	23.8947
22	rs11201034	A	T	A	T	M00054.metal.pos.txt.gz	IPF	0.0043	0.016688	0.6064	0.5921	0.0009	0.020468	1.888e-06	0.4149	7355	903869	0.00309402	22.821
23	rs11720862	T	G	T	G	M00054.metal.pos.txt.gz	IPF	-0.0046	-0.011003	0.6034	0.5867	0.0009	0.018998	3.583e-07	0.5625	7355	953873	0.00353923	26.1164
24	rs11802417	T	C	T	C	M00054.metal.pos.txt.gz	IPF	-0.0041	0.027	0.5816	0.5716	0.0009	0.018926	4.469e-06	0.1537	7355	953873	0.00281369	20.7474
25	rs1220605	A	G	A	G	M00054.metal.pos.txt.gz	IPF	-0.0046	-0.0029484	0.6312	0.6455	0.0009	0.019592	9.291e-07	0.8804	7355	953873	0.00353923	26.1164
26	rs12278762	T	C	T	C	M00054.metal.pos.txt.gz	IPF	0.0043	0.025279	0.5229	0.5264	0.0009	0.018691	1.557e-06	0.1762	7355	953873	0.00309402	22.821
27	rs12468084	T	C	T	C	M00054.metal.pos.txt.gz	IPF	-0.0044	0.026009	0.5436	0.5468	0.0009	0.02014	1.246e-06	0.1966	7355	903869	0.00323913	23.8947
28	rs1260326	T	C	T	C	M00054.metal.pos.txt.gz	IPF	0.0042	-0.0030237	0.404	0.3825	0.0009	0.019156	2.742e-06	0.8746	7355	953873	0.00295221	21.7719
29	rs13001325	T	C	T	C	M00054.metal.pos.txt.gz	IPF	-0.004	-0.026198	0.3823	0.3705	0.0009	0.019307	7.447e-06	0.1748	7355	953873	0.00267847	19.7477
30	rs13008096	A	C	A	C	M00054.metal.pos.txt.gz	IPF	-0.0042	-0.014859	0.4038	0.3818	0.0009	0.019139	3.316e-06	0.4375	7355	953873	0.00295221	21.7719
31	rs13122250	T	C	T	C	M00054.metal.pos.txt.gz	IPF	0.0062	-0.015304	0.5542	0.5725	0.0009	0.020551	8.949e-12	0.4564	7355	903869	0.00641095	47.4439
32	rs1330918	A	C	A	C	M00054.metal.pos.txt.gz	IPF	0.0042	-0.010317	0.6132	0.5752	0.0009	0.018935	2.212e-06	0.5858	7355	953873	0.00295221	21.7719
33	rs1373962	T	C	T	C	M00054.metal.pos.txt.gz	IPF	0.005	0.0075752	0.5973	0.592	0.0009	0.019075	2.707e-08	0.6913	7355	953873	0.00417882	30.8558
34	rs154246	T	C	T	C	M00054.metal.pos.txt.gz	IPF	-0.0049	-0.0024812	0.6103	0.6167	0.0009	0.022113	6.698e-08	0.9107	7355	887228	0.004014	29.6339
35	rs1559063	C	G	C	G	M00054.metal.pos.txt.gz	IPF	0.0052	0.038394	0.6209	0.6252	0.0009	0.019356	7.818e-09	0.0473	7355	953873	0.00451827	33.3736
36	rs16836288	A	C	A	C	M00054.metal.pos.txt.gz	IPF	0.0131	0.036994	0.044	0.05789	0.0029	0.041108	5.601e-06	0.3682	7355	953873	0.00276669	20.3999
37	rs1697901	A	G	A	G	M00054.metal.pos.txt.gz	IPF	0.0049	-0.00061329	0.3501	0.3376	0.0009	0.019769	6.309e-08	0.9753	7355	953873	0.004014	29.6339
38	rs17698249	A	C	A	C	M00054.metal.pos.txt.gz	IPF	-0.0041	-0.0028633	0.5682	0.5942	0.0009	0.019093	5.503e-06	0.8808	7355	953873	0.00281369	20.7474
39	rs17744500	T	C	T	C	M00054.metal.pos.txt.gz	IPF	-0.0041	-0.020877	0.4582	0.4629	0.0009	0.020142	4.157e-06	0.3	7355	903869	0.00281369	20.7474
40	rs1852138	A	G	A	G	M00054.metal.pos.txt.gz	IPF	0.004	0.030187	0.5761	0.5801	0.0009	0.02031	6.335e-06	0.1372	7355	903869	0.00267847	19.7477
41	rs1871053	A	G	A	G	M00054.metal.pos.txt.gz	IPF	-0.0044	0.0093906	0.4514	0.4255	0.0009	0.018814	7.679e-07	0.6177	7355	953873	0.00323913	23.8947
42	rs1995960	A	G	A	G	M00054.metal.pos.txt.gz	IPF	-0.0047	0.015306	0.5949	0.6012	0.0009	0.018979	1.629e-07	0.42	7355	953873	0.0036942	27.2642
43	rs201262	T	G	T	G	M00054.metal.pos.txt.gz	IPF	0.0047	-0.040274	0.5563	0.5775	0.0009	0.018826	1.359e-07	0.03242	7355	953873	0.0036942	27.2642
44	rs2063601	A	C	A	C	M00054.metal.pos.txt.gz	IPF	-0.0107	0.006219	0.2487	0.2328	0.0023	0.025856	5.241e-06	0.8099	1763	739218	0.0121272	21.6182
45	rs2126498	T	G	T	G	M00054.metal.pos.txt.gz	IPF	-0.0042	-0.01202	0.6176	0.613	0.0009	0.019138	2.837e-06	0.53	7355	953873	0.00295221	21.7719
46	rs2178260	T	C	T	C	M00054.metal.pos.txt.gz	IPF	0.0042	-0.020165	0.4251	0.4275	0.0009	0.018862	3.588e-06	0.285	7355	953873	0.00295221	21.7719
47	rs2230532	T	C	T	C	M00054.metal.pos.txt.gz	IPF	0.005	-0.0092585	0.349	0.3632	0.001	0.019412	5.733e-07	0.6334	5592	953873	0.00445077	24.9911
48	rs2349729	A	G	A	G	M00054.metal.pos.txt.gz	IPF	-0.0041	0.015744	0.5141	0.5328	0.0009	0.018794	6.448e-06	0.4022	7355	953873	0.00281369	20.7474
49	rs2432	T	C	T	C	M00054.metal.pos.txt.gz	IPF	0.0046	0.029623	0.4713	0.5032	0.0009	0.020097	4.278e-07	0.1405	7355	903869	0.00353923	26.1164
50	rs2505644	T	C	T	C	M00054.metal.pos.txt.gz	IPF	0.005	-0.024877	0.558	0.5554	0.001	0.018821	5.733e-07	0.1863	5592	953873	0.00445077	24.9911
51	rs2580344	T	C	T	C	M00054.metal.pos.txt.gz	IPF	0.0044	0.01306	0.6238	0.6401	0.0009	0.020705	7.984e-07	0.5282	7355	903869	0.00323913	23.8947
52	rs2658761	T	C	T	C	M00054.metal.pos.txt.gz	IPF	-0.0048	-0.0063569	0.4343	0.443	0.0009	0.018762	6.749e-08	0.7347	7355	953873	0.00385246	28.4367
53	rs2662269	A	C	A	C	M00054.metal.pos.txt.gz	IPF	0.0045	0.0069326	0.417	0.3617	0.0009	0.019352	7.116e-07	0.7202	7355	953873	0.00338753	24.9932
54	rs2688858	T	C	T	C	M00054.metal.pos.txt.gz	IPF	0.0043	0.035271	0.5742	0.5717	0.0009	0.020269	2.837e-06	0.08183	7355	903869	0.00309402	22.821
55	rs2722407	A	G	A	G	M00054.metal.pos.txt.gz	IPF	0.0041	-0.033539	0.587	0.5799	0.0009	0.018912	6.472e-06	0.07616	7355	953873	0.00281369	20.7474
56	rs2769419	A	G	A	G	M00054.metal.pos.txt.gz	IPF	0.004	0.015346	0.4777	0.4622	0.0009	0.018715	6.163e-06	0.4122	7355	953873	0.00267847	19.7477
57	rs2798184	T	C	T	C	M00054.metal.pos.txt.gz	IPF	-0.0049	0.023216	0.4314	0.4527	0.0009	0.018855	6.371e-08	0.2182	7355	953873	0.004014	29.6339
58	rs2834164	A	C	A	C	M00054.metal.pos.txt.gz	IPF	-0.0045	0.034056	0.5041	0.5087	0.0009	0.02016	4.761e-07	0.09116	7355	903869	0.00338753	24.9932
59	rs284191	A	G	A	G	M00054.metal.pos.txt.gz	IPF	-0.006	-0.0051028	0.615	0.6229	0.001	0.019217	1.973e-09	0.7906	5592	953873	0.00639659	35.9871
60	rs2868072	A	G	A	G	M00054.metal.pos.txt.gz	IPF	0.004	-0.0050503	0.4829	0.4967	0.0009	0.020042	9.036e-06	0.801	7355	903869	0.00267847	19.7477
61	rs295142	A	G	A	G	M00054.metal.pos.txt.gz	IPF	-0.0048	0.0013811	0.5909	0.6083	0.0009	0.019121	1.538e-07	0.9424	7355	953873	0.00385246	28.4367
62	rs2970335	A	C	A	C	M00054.metal.pos.txt.gz	IPF	0.0044	0.010409	0.4039	0.3812	0.0009	0.019188	1.023e-06	0.5875	7355	953873	0.00323913	23.8947
63	rs2977272	T	C	T	C	M00054.metal.pos.txt.gz	IPF	0.005	0.0086696	0.341	0.3091	0.001	0.024289	5.733e-07	0.7211	5592	887228	0.00445077	24.9911
64	rs3742929	T	C	T	C	M00054.metal.pos.txt.gz	IPF	-0.0044	0.014706	0.512	0.522	0.0009	0.018652	1.01e-06	0.4304	7355	953873	0.00323913	23.8947
65	rs3751181	A	G	A	G	M00054.metal.pos.txt.gz	IPF	0.0041	-0.04957	0.6085	0.5705	0.0009	0.018981	5.185e-06	0.009014	7355	953873	0.00281369	20.7474
66	rs3773729	T	C	T	C	M00054.metal.pos.txt.gz	IPF	0.004	0.028986	0.6291	0.6564	0.0009	0.019616	8.571e-06	0.1395	7355	953873	0.00267847	19.7477
67	rs3780494	T	C	T	C	M00054.metal.pos.txt.gz	IPF	-0.023	0.11078	0.9855	0.981	0.0051	0.07001	7.022e-06	0.1136	7355	953873	0.00275761	20.3328
68	rs4063769	T	C	T	C	M00054.metal.pos.txt.gz	IPF	-0.0043	-0.02598	0.5301	0.5262	0.0009	0.018871	1.297e-06	0.1686	7355	953873	0.00309402	22.821
69	rs4144737	A	G	A	G	M00054.metal.pos.txt.gz	IPF	0.004	-0.015948	0.5818	0.599	0.0009	0.018946	9.859e-06	0.3999	7355	953873	0.00267847	19.7477
70	rs42162	T	C	T	C	M00054.metal.pos.txt.gz	IPF	0.004	-0.022822	0.5492	0.5419	0.0009	0.018744	8.217e-06	0.2234	7355	953873	0.00267847	19.7477
71	rs428185	T	C	T	C	M00054.metal.pos.txt.gz	IPF	-0.0045	-0.016372	0.5851	0.5609	0.0009	0.018985	6.254e-07	0.3885	7355	953873	0.00338753	24.9932
72	rs430727	T	C	T	C	M00054.metal.pos.txt.gz	IPF	0.0041	-0.010054	0.4628	0.4349	0.0009	0.018743	5.128e-06	0.5917	7355	953873	0.00281369	20.7474
73	rs4611118	A	G	A	G	M00054.metal.pos.txt.gz	IPF	-0.0044	-0.0077608	0.609	0.5819	0.0009	0.020474	9.406e-07	0.7046	7355	903869	0.00323913	23.8947
74	rs4615256	A	G	A	G	M00054.metal.pos.txt.gz	IPF	0.0049	-0.034273	0.5327	0.5004	0.0009	0.018715	4.988e-08	0.06705	7355	953873	0.004014	29.6339
75	rs4751282	T	C	T	C	M00054.metal.pos.txt.gz	IPF	0.0045	-0.00013836	0.5421	0.5264	0.0009	0.020203	7.405e-07	0.9945	7355	903869	0.00338753	24.9932
76	rs4849291	C	G	C	G	M00054.metal.pos.txt.gz	IPF	0.0041	0.030267	0.6092	0.6191	0.0009	0.019203	5.933e-06	0.115	7355	953873	0.00281369	20.7474
77	rs4880888	A	G	A	G	M00054.metal.pos.txt.gz	IPF	-0.0046	0.019833	0.4785	0.4847	0.0009	0.018645	3.243e-07	0.2875	7355	953873	0.00353923	26.1164
78	rs4958379	A	G	A	G	M00054.metal.pos.txt.gz	IPF	-0.005	-0.015856	0.433	0.4112	0.0009	0.018895	2.176e-08	0.4014	7355	953873	0.00417882	30.8558
79	rs4989308	A	G	A	G	M00054.metal.pos.txt.gz	IPF	-0.0045	-0.00031014	0.3746	0.3558	0.0009	0.019817	8.432e-07	0.9875	7355	953873	0.00338753	24.9932
80	rs5997110	T	C	T	C	M00054.metal.pos.txt.gz	IPF	-0.005	0.014477	0.523	0.4848	0.001	0.018662	5.733e-07	0.4379	5592	953873	0.00445077	24.9911
81	rs6001129	T	C	T	C	M00054.metal.pos.txt.gz	IPF	-0.009	0.034104	0.134	0.1163	0.002	0.030815	6.795e-06	0.2684	5592	937232	0.00360818	20.2428
82	rs603446	T	C	T	C	M00054.metal.pos.txt.gz	IPF	0.0051	-0.000645	0.4448	0.4189	0.0009	0.020295	1.383e-08	0.9746	7355	903869	0.00434691	32.1024
83	rs6110544	T	C	T	C	M00054.metal.pos.txt.gz	IPF	0.004	-0.0068227	0.4394	0.4711	0.0009	0.020228	7.011e-06	0.7359	7355	903869	0.00267847	19.7477
84	rs6130271	T	C	T	C	M00054.metal.pos.txt.gz	IPF	-0.004	-0.0028155	0.5352	0.5397	0.0009	0.018708	7.398e-06	0.8804	7355	953873	0.00267847	19.7477
85	rs6454864	T	C	T	C	M00054.metal.pos.txt.gz	IPF	0.004	-0.010413	0.3705	0.3903	0.0009	0.019236	8.872e-06	0.5883	7355	953873	0.00267847	19.7477
86	rs6480970	A	G	A	G	M00054.metal.pos.txt.gz	IPF	-0.0049	0.036725	0.6159	0.6177	0.0009	0.019226	4.287e-08	0.05611	7355	953873	0.004014	29.6339
87	rs6534667	C	G	C	G	M00054.metal.pos.txt.gz	IPF	-0.0043	0.019955	0.4186	0.3952	0.0009	0.018974	1.491e-06	0.2929	7355	953873	0.00309402	22.821
88	rs6537156	T	C	T	C	M00054.metal.pos.txt.gz	IPF	0.004	-0.0090169	0.4485	0.4549	0.0009	0.018753	8.091e-06	0.6306	7355	953873	0.00267847	19.7477
89	rs6685230	T	C	T	C	M00054.metal.pos.txt.gz	IPF	-0.0042	0.0054108	0.3976	0.3777	0.0009	0.019851	7.78e-06	0.7852	7355	953873	0.00295221	21.7719
90	rs6730726	A	G	A	G	M00054.metal.pos.txt.gz	IPF	-0.004	-0.02631	0.5312	0.5431	0.0009	0.018722	7.167e-06	0.1599	7355	953873	0.00267847	19.7477
91	rs6819555	A	G	A	G	M00054.metal.pos.txt.gz	IPF	-0.0043	-0.0026926	0.5862	0.5839	0.0009	0.020728	3.693e-06	0.8966	7355	903869	0.00309402	22.821
92	rs682359	T	G	T	G	M00054.metal.pos.txt.gz	IPF	0.0044	0.033615	0.5812	0.5981	0.0009	0.020366	6.54e-07	0.09883	7355	903869	0.00323913	23.8947
93	rs699856	T	C	T	C	M00054.metal.pos.txt.gz	IPF	0.004	0.019754	0.3661	0.3836	0.0009	0.020674	8.012e-06	0.3393	7355	903869	0.00267847	19.7477
94	rs7006068	T	C	T	C	M00054.metal.pos.txt.gz	IPF	0.0045	0.023397	0.6264	0.5992	0.0009	0.019179	4.801e-07	0.2225	7355	953873	0.00338753	24.9932
95	rs7009696	T	C	T	C	M00054.metal.pos.txt.gz	IPF	0.0041	0.037292	0.6243	0.6126	0.0009	0.019176	6.166e-06	0.05181	7355	953873	0.00281369	20.7474
96	rs710580	A	C	A	C	M00054.metal.pos.txt.gz	IPF	-0.005	0.0088643	0.3566	0.3685	0.0009	0.019297	3.574e-08	0.646	7355	953873	0.00417882	30.8558
97	rs7109477	A	G	A	G	M00054.metal.pos.txt.gz	IPF	-0.0047	0.033044	0.4588	0.4598	0.0009	0.018713	1.887e-07	0.07742	7355	953873	0.0036942	27.2642
98	rs719564	A	G	A	G	M00054.metal.pos.txt.gz	IPF	0.0044	0.00441	0.6101	0.6361	0.0009	0.019284	1.276e-06	0.8191	7355	953873	0.00323913	23.8947
99	rs7246393	A	G	A	G	M00054.metal.pos.txt.gz	IPF	0.0043	-0.0090262	0.5222	0.515	0.0009	0.019939	1.554e-06	0.6508	7355	937232	0.00309402	22.821
100	rs7463805	T	C	T	C	M00054.metal.pos.txt.gz	IPF	-0.0053	-0.023035	0.5213	0.5049	0.0009	0.01864	4.596e-09	0.2165	7355	953873	0.0046929	34.6696
101	rs7505177	T	G	T	G	M00054.metal.pos.txt.gz	IPF	-0.0043	-0.005093	0.4132	0.4236	0.0009	0.019012	5.859e-06	0.7888	7355	953873	0.00309402	22.821
102	rs7594598	A	C	A	C	M00054.metal.pos.txt.gz	IPF	0.004	0.021242	0.4257	0.4162	0.0009	0.020405	9.497e-06	0.2979	7355	903869	0.00267847	19.7477
103	rs7638383	A	G	A	G	M00054.metal.pos.txt.gz	IPF	0.0047	0.016127	0.3984	0.3694	0.0009	0.019224	1.641e-07	0.4015	7355	953873	0.0036942	27.2642
104	rs7810390	A	G	A	G	M00054.metal.pos.txt.gz	IPF	-0.0045	0.01383	0.5928	0.6001	0.0009	0.018989	5.611e-07	0.4664	7355	953873	0.00338753	24.9932
105	rs7843149	T	C	T	C	M00054.metal.pos.txt.gz	IPF	-0.0041	-0.019864	0.3896	0.374	0.0009	0.019229	6.554e-06	0.3016	7355	953873	0.00281369	20.7474
106	rs8021242	T	C	T	C	M00054.metal.pos.txt.gz	IPF	0.0049	0.021907	0.5899	0.6007	0.0009	0.030332	5.183e-08	0.4702	7355	280689	0.004014	29.6339
107	rs8110890	T	G	T	G	M00054.metal.pos.txt.gz	IPF	0.0045	-0.00032505	0.4741	0.4699	0.0009	0.02013	7.505e-07	0.9871	7355	903869	0.00338753	24.9932
108	rs875184	T	C	T	C	M00054.metal.pos.txt.gz	IPF	-0.0041	0.023109	0.403	0.4136	0.0009	0.019023	5.689e-06	0.2244	7355	953873	0.00281369	20.7474
109	rs875283	A	G	A	G	M00054.metal.pos.txt.gz	IPF	-0.0043	0.036778	0.4896	0.4719	0.0009	0.020104	2.341e-06	0.06734	7355	903869	0.00309402	22.821
110	rs881562	T	G	T	G	M00054.metal.pos.txt.gz	IPF	0.0044	-8.6048e-05	0.4978	0.5169	0.0009	0.020337	1.451e-06	0.9966	7355	903869	0.00323913	23.8947
111	rs893922	A	G	A	G	M00054.metal.pos.txt.gz	IPF	0.0042	-0.02725	0.366	0.3876	0.0009	0.022349	3.945e-06	0.2227	7355	887228	0.00295221	21.7719
112	rs928963	A	C	A	C	M00054.metal.pos.txt.gz	IPF	0.0042	-0.0093102	0.3985	0.4085	0.0009	0.019067	3.622e-06	0.6254	7355	953873	0.00295221	21.7719
113	rs9315440	A	G	A	G	M00054.metal.pos.txt.gz	IPF	0.0048	0.0067209	0.5843	0.5977	0.0009	0.020747	6.712e-08	0.746	7355	903869	0.00385246	28.4367
114	rs9330454	A	G	A	G	M00054.metal.pos.txt.gz	IPF	-0.0066	0.022962	0.4006	0.4044	0.0015	0.020561	6.044e-06	0.2641	7355	903869	0.00262531	19.3547
115	rs937382	T	C	T	C	M00054.metal.pos.txt.gz	IPF	-0.0046	-0.015069	0.4466	0.437	0.0009	0.018857	2.312e-07	0.4242	7355	953873	0.00353923	26.1164
116	rs938040	T	C	T	C	M00054.metal.pos.txt.gz	IPF	0.0074	-0.00031202	0.107	0.1071	0.0017	0.034882	9.124e-06	0.9929	7355	887228	0.0025696	18.9429
117	rs9464137	A	C	A	C	M00054.metal.pos.txt.gz	IPF	0.0041	0.011882	0.5592	0.5695	0.0009	0.018738	4.445e-06	0.526	7355	953873	0.00281369	20.7474
118	rs9511152	A	G	A	G	M00054.metal.pos.txt.gz	IPF	-0.005	0.027231	0.559	0.572	0.0009	0.018938	2.985e-08	0.1505	7355	953873	0.00417882	30.8558
119	rs9523030	T	G	T	G	M00054.metal.pos.txt.gz	IPF	0.0043	0.022582	0.6269	0.636	0.0009	0.019403	5.647e-06	0.2445	7355	953873	0.00309402	22.821
120	rs9541214	T	C	T	C	M00054.metal.pos.txt.gz	IPF	-0.0042	-0.0041275	0.653	0.6571	0.0009	0.019578	3.797e-06	0.833	7355	953873	0.00295221	21.7719
121	rs9610322	A	G	A	G	M00054.metal.pos.txt.gz	IPF	-0.0043	-0.01258	0.5195	0.5389	0.0009	0.02016	1.119e-06	0.5326	7355	903869	0.00309402	22.821
122	rs9646527	A	T	A	T	M00054.metal.pos.txt.gz	IPF	0.004	-0.0034193	0.3795	0.3836	0.0009	0.020524	9.002e-06	0.8677	7355	903869	0.00267847	19.7477
123	rs9649963	T	C	T	C	M00054.metal.pos.txt.gz	IPF	0.0041	0.020495	0.634	0.6318	0.0009	0.019352	5.841e-06	0.2896	7355	953873	0.00281369	20.7474
124	rs972459	T	C	T	C	M00054.metal.pos.txt.gz	IPF	0.005	-0.013042	0.5787	0.5838	0.0009	0.020159	1.969e-08	0.5177	7355	937232	0.00417882	30.8558
130	rs1527683	T	C	T	C	M00059.metal.pos.txt.gz	IPF	0.0061	0.03817	0.8	0.7959	0.0013	0.025021	2.168e-06	0.1271	7355	903869	0.00298464	22.0118
131	rs16868246	C	G	C	G	M00059.metal.pos.txt.gz	IPF	0.0097	0.0035254	0.2113	0.1928	0.0013	0.02319	1.778e-14	0.8792	7355	953873	0.00751275	55.6594
132	rs2176664	T	C	T	C	M00059.metal.pos.txt.gz	IPF	-0.0059	-0.0091226	0.2846	0.317	0.0012	0.020364	2.027e-06	0.6542	7355	953873	0.00327592	24.167
133	rs4768741	C	G	C	G	M00059.metal.pos.txt.gz	IPF	-0.015	-0.025979	0.9153	0.9119	0.0032	0.033179	3.524e-06	0.4336	1762	953873	0.0123167	21.9477
134	rs7014133	A	G	A	G	M00059.metal.pos.txt.gz	IPF	-0.0561	0.010733	0.0119	0.007648	0.0109	0.1217	2.739e-07	0.9297	1762	887228	0.0148111	26.4594
135	rs715	T	C	T	C	M00059.metal.pos.txt.gz	IPF	0.0059	-0.017156	0.7135	0.6888	0.0012	0.019995	1.651e-06	0.3909	7355	953873	0.00327592	24.167
141	rs10004285	A	G	A	G	M00060.metal.pos.txt.gz	IPF	0.005	-0.015275	0.374	0.4081	0.001	0.019021	5.733e-07	0.4219	5589	953873	0.00445315	24.9911
142	rs1003887	T	C	T	C	M00060.metal.pos.txt.gz	IPF	-0.005	0.00079303	0.651	0.6661	0.001	0.021997	5.733e-07	0.9712	5589	937232	0.00445315	24.9911
143	rs10190188	T	C	T	C	M00060.metal.pos.txt.gz	IPF	0.005	0.0028988	0.662	0.6463	0.001	0.019566	5.733e-07	0.8822	5589	953873	0.00445315	24.9911
144	rs10258601	A	G	A	G	M00060.metal.pos.txt.gz	IPF	0.0044	-0.013898	0.4382	0.4525	0.0009	0.018827	6.734e-07	0.4604	7351	953873	0.00324089	23.8947
145	rs1043991	T	C	T	C	M00060.metal.pos.txt.gz	IPF	0.0048	-0.035047	0.6375	0.648	0.0009	0.019365	8.333e-08	0.07032	7351	953873	0.00385455	28.4367
146	rs10487377	A	G	A	G	M00060.metal.pos.txt.gz	IPF	0.0046	-0.021058	0.5764	0.574	0.0009	0.018953	4.091e-07	0.2665	7351	953873	0.00354114	26.1163
147	rs10798580	A	G	A	G	M00060.metal.pos.txt.gz	IPF	-0.0042	0.01672	0.4216	0.4176	0.0009	0.018956	3.64e-06	0.3777	7351	953873	0.00295381	21.7719
148	rs10810580	T	C	T	C	M00060.metal.pos.txt.gz	IPF	0.0046	-0.014531	0.5583	0.551	0.0009	0.018881	3.282e-07	0.4415	7351	953873	0.00354114	26.1163
149	rs10828678	A	G	A	G	M00060.metal.pos.txt.gz	IPF	0.004	-0.022506	0.5105	0.5315	0.0009	0.018694	7.202e-06	0.2286	7351	953873	0.00267993	19.7477
150	rs10911251	A	C	A	C	M00060.metal.pos.txt.gz	IPF	-0.0047	-0.0040783	0.5759	0.5588	0.0009	0.021115	1.584e-07	0.8468	7351	621641	0.00369621	27.2642
151	rs10923016	A	G	A	G	M00060.metal.pos.txt.gz	IPF	0.0053	0.00455	0.6191	0.5729	0.0009	0.019129	2.88e-09	0.812	7351	953873	0.00469544	34.6696
152	rs10937762	A	G	A	G	M00060.metal.pos.txt.gz	IPF	0.0044	0.011949	0.5674	0.5628	0.0009	0.018994	1.528e-06	0.5293	7351	953873	0.00324089	23.8947
153	rs10973683	A	C	A	C	M00060.metal.pos.txt.gz	IPF	-0.0041	0.020267	0.4002	0.3935	0.0009	0.018995	6.541e-06	0.286	7351	953873	0.00281522	20.7474
154	rs1104999	T	C	T	C	M00060.metal.pos.txt.gz	IPF	0.0041	0.032475	0.4822	0.4802	0.0009	0.02001	3.51e-06	0.1046	7351	903869	0.00281522	20.7474
155	rs11144511	T	C	T	C	M00060.metal.pos.txt.gz	IPF	-0.0042	-0.0019305	0.4497	0.4881	0.0009	0.021065	8.417e-06	0.927	7351	903869	0.00295381	21.7719
156	rs11203041	A	G	A	G	M00060.metal.pos.txt.gz	IPF	-0.0043	-0.00067007	0.4458	0.4349	0.0009	0.018806	1.953e-06	0.9716	7351	953873	0.0030957	22.8209
157	rs11657125	T	C	T	C	M00060.metal.pos.txt.gz	IPF	0.0041	0.00074352	0.5604	0.5584	0.0009	0.018787	5.71e-06	0.9684	7351	953873	0.00281522	20.7474
158	rs11868948	A	G	A	G	M00060.metal.pos.txt.gz	IPF	-0.0042	0.01766	0.6435	0.6208	0.0009	0.020678	4.628e-06	0.3931	7351	903869	0.00295381	21.7719
159	rs11952637	A	G	A	G	M00060.metal.pos.txt.gz	IPF	0.0043	0.018167	0.4212	0.4157	0.0009	0.018928	4.313e-06	0.3372	7351	953873	0.0030957	22.8209
160	rs12047618	T	G	T	G	M00060.metal.pos.txt.gz	IPF	0.0046	-0.027042	0.3271	0.3222	0.0009	0.020079	4.25e-07	0.1781	7351	953873	0.00354114	26.1163
161	rs12355470	T	C	T	C	M00060.metal.pos.txt.gz	IPF	-0.004	-0.017431	0.6071	0.5866	0.0009	0.020419	7.675e-06	0.3933	7351	903869	0.00267993	19.7477
162	rs12498703	A	G	A	G	M00060.metal.pos.txt.gz	IPF	-0.0042	0.0090555	0.5998	0.5816	0.0009	0.018961	2.86e-06	0.6329	7351	953873	0.00295381	21.7719
163	rs12517096	A	G	A	G	M00060.metal.pos.txt.gz	IPF	0.0041	0.020018	0.422	0.425	0.0009	0.020213	8.406e-06	0.322	7351	903869	0.00281522	20.7474
164	rs12612007	A	G	A	G	M00060.metal.pos.txt.gz	IPF	0.0044	-0.029976	0.3461	0.3302	0.0009	0.019768	1.202e-06	0.1294	7351	953873	0.00324089	23.8947
165	rs13130810	T	C	T	C	M00060.metal.pos.txt.gz	IPF	0.004	0.016347	0.4401	0.4215	0.0009	0.018873	7.791e-06	0.3864	7351	953873	0.00267993	19.7477
166	rs13147572	A	G	A	G	M00060.metal.pos.txt.gz	IPF	-0.0047	-0.0038093	0.5809	0.5543	0.0009	0.01881	1.99e-07	0.8395	7351	953873	0.00369621	27.2642
167	rs1360820	A	G	A	G	M00060.metal.pos.txt.gz	IPF	-0.0042	-0.023588	0.4963	0.5094	0.0009	0.018644	2.154e-06	0.2058	7351	953873	0.00295381	21.7719
168	rs1368532	T	C	T	C	M00060.metal.pos.txt.gz	IPF	-0.004	-0.027229	0.3842	0.3927	0.0009	0.019184	8.855e-06	0.1558	7351	953873	0.00267993	19.7477
169	rs1428203	T	G	T	G	M00060.metal.pos.txt.gz	IPF	0.0045	-0.011067	0.4117	0.4316	0.0009	0.01902	5.513e-07	0.5607	7351	953873	0.00338937	24.9932
170	rs1463301	T	C	T	C	M00060.metal.pos.txt.gz	IPF	-0.0049	0.031229	0.5742	0.5594	0.0009	0.020218	7.493e-08	0.1224	7351	903869	0.00401618	29.6339
171	rs1541245	T	C	T	C	M00060.metal.pos.txt.gz	IPF	-0.0048	-0.012255	0.5318	0.5341	0.0009	0.020051	7.988e-08	0.5411	7351	903869	0.00385455	28.4367
172	rs1558789	A	C	A	C	M00060.metal.pos.txt.gz	IPF	0.0045	-0.023554	0.51	0.5075	0.0009	0.018619	3.523e-07	0.2058	7351	953873	0.00338937	24.9932
173	rs1564480	A	G	A	G	M00060.metal.pos.txt.gz	IPF	0.0045	0.0078296	0.4765	0.4947	0.0009	0.018619	6.681e-07	0.6741	7351	953873	0.00338937	24.9932
174	rs1654495	A	C	A	C	M00060.metal.pos.txt.gz	IPF	0.0048	0.0011828	0.5709	0.5647	0.0009	0.020126	1.036e-07	0.9531	7351	903869	0.00385455	28.4367
175	rs167648	A	C	A	C	M00060.metal.pos.txt.gz	IPF	-0.0041	-0.0023527	0.4439	0.4595	0.0009	0.020428	4.515e-06	0.9083	7351	903869	0.00281522	20.7474
176	rs1677193	A	C	A	C	M00060.metal.pos.txt.gz	IPF	-0.0044	-0.014796	0.6122	0.6029	0.0009	0.020453	1.246e-06	0.4694	7351	903869	0.00324089	23.8947
177	rs1705832	T	C	T	C	M00060.metal.pos.txt.gz	IPF	0.0043	-0.013179	0.395	0.415	0.0009	0.019088	1.898e-06	0.4899	7351	953873	0.0030957	22.8209
178	rs17107974	T	C	T	C	M00060.metal.pos.txt.gz	IPF	-0.0082	0.047854	0.1068	0.1079	0.0017	0.03002	1.496e-06	0.1109	7351	953873	0.00315508	23.2601
179	rs17173197	T	C	T	C	M00060.metal.pos.txt.gz	IPF	-0.0044	-0.014883	0.3872	0.3854	0.0009	0.019156	2.464e-06	0.4372	7351	953873	0.00324089	23.8947
180	rs1822834	C	G	C	G	M00060.metal.pos.txt.gz	IPF	0.0108	-0.038304	0.0629	0.05895	0.0024	0.037976	6.594e-06	0.3131	7351	953873	0.00274716	20.2445
181	rs1862710	A	G	A	G	M00060.metal.pos.txt.gz	IPF	0.0047	0.011418	0.5489	0.5824	0.0009	0.018897	1.174e-07	0.5457	7351	953873	0.00369621	27.2642
182	rs1871053	A	G	A	G	M00060.metal.pos.txt.gz	IPF	-0.005	0.0093906	0.4513	0.4255	0.0009	0.018814	2.401e-08	0.6177	7351	953873	0.00418108	30.8558
183	rs1872800	A	T	A	T	M00060.metal.pos.txt.gz	IPF	-0.004	0.021129	0.6438	0.6302	0.0009	0.019437	8.247e-06	0.277	7351	953873	0.00267993	19.7477
184	rs1884639	T	C	T	C	M00060.metal.pos.txt.gz	IPF	0.0047	-0.010646	0.3865	0.3834	0.0009	0.020956	2.316e-07	0.6114	7351	903869	0.00369621	27.2642
185	rs1931001	T	G	T	G	M00060.metal.pos.txt.gz	IPF	-0.0043	0.02606	0.3503	0.3424	0.0009	0.021172	1.622e-06	0.2184	7351	903869	0.0030957	22.8209
186	rs2146498	A	G	A	G	M00060.metal.pos.txt.gz	IPF	0.004	-0.014751	0.5787	0.5549	0.0009	0.018843	8.041e-06	0.4337	7351	953873	0.00267993	19.7477
187	rs2273875	C	G	C	G	M00060.metal.pos.txt.gz	IPF	0.0043	-0.012963	0.37	0.3629	0.0009	0.022152	1.821e-06	0.5584	7351	887228	0.0030957	22.8209
188	rs2285137	T	C	T	C	M00060.metal.pos.txt.gz	IPF	-0.0108	0.020695	0.9436	0.93651	0.0024	0.041384	5.351e-06	0.617	7351	903869	0.00274716	20.2445
189	rs2357713	T	G	T	G	M00060.metal.pos.txt.gz	IPF	-0.0042	0.01846	0.447	0.4659	0.0009	0.018818	2.999e-06	0.3266	7351	953873	0.00295381	21.7719
190	rs2373642	A	G	A	G	M00060.metal.pos.txt.gz	IPF	-0.0536	-0.044865	0.0138	0.03453	0.0117	0.061023	4.722e-06	0.4622	1762	885936	0.0117709	20.9635
191	rs242082	T	C	T	C	M00060.metal.pos.txt.gz	IPF	0.0048	-0.032252	0.3867	0.4019	0.0009	0.020421	1.383e-07	0.1143	7351	903869	0.00385455	28.4367
192	rs2465250	A	C	A	C	M00060.metal.pos.txt.gz	IPF	0.0048	-0.0079343	0.5503	0.5141	0.0009	0.020068	7.761e-08	0.6926	7351	903869	0.00385455	28.4367
193	rs2471650	T	C	T	C	M00060.metal.pos.txt.gz	IPF	-0.0048	-0.013442	0.5252	0.5367	0.0009	0.020295	1.16e-07	0.5078	7351	903869	0.00385455	28.4367
194	rs248065	A	G	A	G	M00060.metal.pos.txt.gz	IPF	-0.0048	0.0050556	0.5081	0.5329	0.0009	0.018723	1.127e-07	0.7871	7351	953873	0.00385455	28.4367
195	rs2513896	A	G	A	G	M00060.metal.pos.txt.gz	IPF	0.0042	0.025111	0.3526	0.3532	0.001	0.021135	9.648e-06	0.2348	7351	903869	0.00239393	17.6352
196	rs2624695	T	C	T	C	M00060.metal.pos.txt.gz	IPF	-0.004	-0.013339	0.5102	0.4784	0.0009	0.018781	8.941e-06	0.4776	7351	953873	0.00267993	19.7477
197	rs2713737	A	G	A	G	M00060.metal.pos.txt.gz	IPF	-0.006	0.020796	0.44	0.476	0.001	0.020283	1.973e-09	0.3052	5589	903869	0.0064	35.9871
198	rs2898645	T	C	T	C	M00060.metal.pos.txt.gz	IPF	-0.005	-0.024486	0.545	0.5355	0.001	0.018663	5.733e-07	0.1895	5589	953873	0.00445315	24.9911
199	rs2933284	T	C	T	C	M00060.metal.pos.txt.gz	IPF	0.0042	-0.021621	0.3898	0.4048	0.0009	0.022138	2.86e-06	0.3287	7351	887228	0.00295381	21.7719
200	rs3102519	A	G	A	G	M00060.metal.pos.txt.gz	IPF	0.0048	-0.0022421	0.375	0.3945	0.0009	0.019081	7.83e-08	0.9065	7351	953873	0.00385455	28.4367
201	rs37959	T	C	T	C	M00060.metal.pos.txt.gz	IPF	0.0044	-0.0033869	0.3912	0.3625	0.0009	0.02097	1.708e-06	0.8717	7351	903869	0.00324089	23.8947
202	rs3802681	T	C	T	C	M00060.metal.pos.txt.gz	IPF	0.0045	-0.005829	0.6144	0.6261	0.0009	0.019216	5.437e-07	0.7616	7351	953873	0.00338937	24.9932
203	rs390836	A	T	A	T	M00060.metal.pos.txt.gz	IPF	0.0045	-0.0044972	0.415	0.3969	0.0009	0.02051	8.059e-07	0.8264	7351	903869	0.00338937	24.9932
204	rs4074961	T	C	T	C	M00060.metal.pos.txt.gz	IPF	-0.0044	-0.0050291	0.4317	0.46	0.001	0.018767	4.228e-06	0.7887	7351	953873	0.00262674	19.3547
205	rs4077470	T	C	T	C	M00060.metal.pos.txt.gz	IPF	-0.0045	0.0045312	0.5403	0.5603	0.0009	0.020106	4.646e-07	0.8217	7351	903869	0.00338937	24.9932
206	rs4148593	A	G	A	G	M00060.metal.pos.txt.gz	IPF	0.005	0.0050916	0.624	0.6423	0.001	0.01936	5.733e-07	0.7926	5589	953873	0.00445315	24.9911
207	rs417144	T	C	T	C	M00060.metal.pos.txt.gz	IPF	0.0046	-0.022011	0.3507	0.3567	0.0009	0.019497	2.565e-07	0.2589	7351	953873	0.00354114	26.1163
208	rs4531478	A	G	A	G	M00060.metal.pos.txt.gz	IPF	0.0041	-0.010771	0.4713	0.4096	0.0009	0.019168	4.451e-06	0.5742	7351	953873	0.00281522	20.7474
209	rs4726308	T	G	T	G	M00060.metal.pos.txt.gz	IPF	-0.0042	0.00039197	0.3944	0.3704	0.0009	0.019296	3.346e-06	0.9838	7351	953873	0.00295381	21.7719
210	rs4741887	A	G	A	G	M00060.metal.pos.txt.gz	IPF	-0.0047	0.0064615	0.4584	0.4859	0.0009	0.020023	1.68e-07	0.7469	7351	903869	0.00369621	27.2642
211	rs4758270	A	G	A	G	M00060.metal.pos.txt.gz	IPF	-0.0048	0.022107	0.6483	0.6493	0.0009	0.021114	2.013e-07	0.2951	7351	903869	0.00385455	28.4367
212	rs4767788	A	G	A	G	M00060.metal.pos.txt.gz	IPF	0.0047	-0.013851	0.4189	0.4156	0.0009	0.01902	5.738e-07	0.4665	7351	953873	0.00369621	27.2642
213	rs477992	A	G	A	G	M00060.metal.pos.txt.gz	IPF	-0.0047	0.035093	0.3228	0.3163	0.0009	0.019933	1.999e-07	0.07831	7351	953873	0.00369621	27.2642
214	rs4795552	A	G	A	G	M00060.metal.pos.txt.gz	IPF	-0.0047	-0.0054543	0.3894	0.375	0.0009	0.020658	1.545e-07	0.7918	7351	903869	0.00369621	27.2642
215	rs481781	T	C	T	C	M00060.metal.pos.txt.gz	IPF	0.0044	0.014996	0.5409	0.5272	0.0009	0.018679	9.144e-07	0.4221	7351	953873	0.00324089	23.8947
216	rs4851946	A	G	A	G	M00060.metal.pos.txt.gz	IPF	0.0042	0.0058105	0.5706	0.5824	0.0009	0.018928	2.195e-06	0.7589	7351	953873	0.00295381	21.7719
217	rs4875397	A	G	A	G	M00060.metal.pos.txt.gz	IPF	-0.0042	-0.013079	0.5599	0.5814	0.0009	0.019006	3.037e-06	0.4914	7351	953873	0.00295381	21.7719
218	rs4889294	T	C	T	C	M00060.metal.pos.txt.gz	IPF	-0.0041	-0.027838	0.5449	0.5563	0.0009	0.019967	3.646e-06	0.1632	7351	937232	0.00281522	20.7474
219	rs4921412	C	G	C	G	M00060.metal.pos.txt.gz	IPF	-0.0042	0.023151	0.3864	0.3796	0.0009	0.01915	2.781e-06	0.2267	7351	953873	0.00295381	21.7719
220	rs498475	A	G	A	G	M00060.metal.pos.txt.gz	IPF	-0.004	0.0015767	0.6277	0.6332	0.0009	0.020763	6.656e-06	0.9395	7351	903869	0.00267993	19.7477
221	rs6003916	T	C	T	C	M00060.metal.pos.txt.gz	IPF	0.0087	0.0036263	0.8966	0.8695	0.0018	0.028835	1.057e-06	0.8999	7351	953873	0.00316788	23.3548
222	rs606798	T	G	T	G	M00060.metal.pos.txt.gz	IPF	0.004	0.045947	0.3722	0.3489	0.0009	0.019479	9.901e-06	0.01833	7351	953873	0.00267993	19.7477
223	rs6103894	T	G	T	G	M00060.metal.pos.txt.gz	IPF	-0.0043	0.011824	0.5939	0.6149	0.0009	0.019238	2.705e-06	0.5388	7351	953873	0.0030957	22.8209
224	rs618001	T	C	T	C	M00060.metal.pos.txt.gz	IPF	0.0041	-0.010825	0.5857	0.573	0.0009	0.01889	4.176e-06	0.5666	7351	953873	0.00281522	20.7474
225	rs631750	T	C	T	C	M00060.metal.pos.txt.gz	IPF	0.0041	0.014115	0.3544	0.3501	0.0009	0.020771	7.506e-06	0.4968	7351	937232	0.00281522	20.7474
226	rs637828	A	C	A	C	M00060.metal.pos.txt.gz	IPF	0.0041	0.0036325	0.5424	0.5515	0.0009	0.02014	5.812e-06	0.8569	7351	903869	0.00281522	20.7474
227	rs6470194	A	G	A	G	M00060.metal.pos.txt.gz	IPF	0.005	0.024274	0.406	0.4225	0.001	0.022389	5.733e-07	0.2783	5589	903869	0.00445315	24.9911
228	rs6475359	A	G	A	G	M00060.metal.pos.txt.gz	IPF	-0.0046	-0.0023752	0.4127	0.4376	0.0009	0.020842	3.573e-07	0.9093	7351	903869	0.00354114	26.1163
229	rs6518309	A	C	A	C	M00060.metal.pos.txt.gz	IPF	0.0043	0.026122	0.6195	0.6337	0.0009	0.020971	1.78e-06	0.2129	7351	903869	0.0030957	22.8209
230	rs6543342	T	C	T	C	M00060.metal.pos.txt.gz	IPF	0.004	0.0027829	0.3778	0.3744	0.0009	0.019272	8.561e-06	0.8852	7351	953873	0.00267993	19.7477
231	rs6562776	A	G	A	G	M00060.metal.pos.txt.gz	IPF	-0.0043	0.01326	0.6116	0.6212	0.0009	0.0206	1.645e-06	0.5198	7351	903869	0.0030957	22.8209
232	rs6735596	A	C	A	C	M00060.metal.pos.txt.gz	IPF	-0.0052	-0.012058	0.6267	0.6469	0.0009	0.019507	1.153e-08	0.5365	7351	953873	0.00452072	33.3736
233	rs6737109	T	C	T	C	M00060.metal.pos.txt.gz	IPF	0.0051	-0.022247	0.5761	0.5783	0.0009	0.020306	1.454e-08	0.2732	7351	903869	0.00434927	32.1024
234	rs6820011	T	G	T	G	M00060.metal.pos.txt.gz	IPF	-0.0051	-0.015262	0.5152	0.5528	0.0009	0.02026	1.182e-08	0.4513	7351	903869	0.00434927	32.1024
235	rs6820313	T	G	T	G	M00060.metal.pos.txt.gz	IPF	0.0049	-0.017506	0.5169	0.5352	0.0009	0.020084	4.651e-08	0.3834	7351	903869	0.00401618	29.6339
236	rs6982408	T	G	T	G	M00060.metal.pos.txt.gz	IPF	-0.0042	-0.00639	0.4435	0.4423	0.0009	0.018761	2.322e-06	0.7334	7351	953873	0.00295381	21.7719
237	rs699856	T	C	T	C	M00060.metal.pos.txt.gz	IPF	0.004	0.019754	0.3661	0.3836	0.0009	0.020674	7.449e-06	0.3393	7351	903869	0.00267993	19.7477
238	rs7082507	T	G	T	G	M00060.metal.pos.txt.gz	IPF	0.0041	-0.012633	0.5142	0.5479	0.0009	0.018789	5.116e-06	0.5014	7351	953873	0.00281522	20.7474
239	rs7137008	A	G	A	G	M00060.metal.pos.txt.gz	IPF	0.0046	0.032387	0.4468	0.4446	0.0009	0.018725	2.601e-07	0.08371	7351	953873	0.00354114	26.1163
240	rs720293	A	G	A	G	M00060.metal.pos.txt.gz	IPF	0.0043	0.0028248	0.4312	0.4058	0.0009	0.020452	2.528e-06	0.8901	7351	903869	0.0030957	22.8209
241	rs720625	A	G	A	G	M00060.metal.pos.txt.gz	IPF	-0.0046	0.001631	0.6267	0.6132	0.0009	0.02077	4.655e-07	0.9374	7351	903869	0.00354114	26.1163
242	rs720816	A	G	A	G	M00060.metal.pos.txt.gz	IPF	0.004	0.013892	0.5425	0.5548	0.0009	0.018805	7.764e-06	0.4601	7351	953873	0.00267993	19.7477
243	rs7301176	T	C	T	C	M00060.metal.pos.txt.gz	IPF	0.0043	-0.0085208	0.4603	0.4615	0.0009	0.020167	1.861e-06	0.6726	7351	903869	0.0030957	22.8209
244	rs7366464	T	C	T	C	M00060.metal.pos.txt.gz	IPF	-0.0075	0.018636	0.1258	0.1344	0.0017	0.027436	7.783e-06	0.497	7351	953873	0.00264077	19.4584
245	rs7584322	A	C	A	C	M00060.metal.pos.txt.gz	IPF	-0.0048	-0.030731	0.4742	0.4419	0.0009	0.018834	7.033e-08	0.1027	7351	953873	0.00385455	28.4367
246	rs7625991	A	C	A	C	M00060.metal.pos.txt.gz	IPF	-0.0042	-0.021599	0.345	0.3543	0.0009	0.021152	5.897e-06	0.3072	7351	903869	0.00295381	21.7719
247	rs7647029	A	G	A	G	M00060.metal.pos.txt.gz	IPF	0.0053	-0.010323	0.6479	0.6414	0.0009	0.019469	1.021e-08	0.5959	7351	953873	0.00469544	34.6696
248	rs7685009	A	G	A	G	M00060.metal.pos.txt.gz	IPF	-0.0045	0.006168	0.6582	0.6569	0.0009	0.019742	6.437e-07	0.7547	7351	953873	0.00338937	24.9932
249	rs769630	T	C	T	C	M00060.metal.pos.txt.gz	IPF	0.0041	-0.031654	0.6016	0.586	0.0009	0.018933	5.064e-06	0.09454	7351	953873	0.00281522	20.7474
250	rs7740614	A	G	A	G	M00060.metal.pos.txt.gz	IPF	-0.0049	-0.0044267	0.4838	0.4814	0.0009	0.018721	4.746e-08	0.8131	7351	953873	0.00401618	29.6339
251	rs7825809	T	C	T	C	M00060.metal.pos.txt.gz	IPF	-0.0047	-0.0080924	0.4319	0.4127	0.0009	0.018985	1.549e-07	0.6699	7351	953873	0.00369621	27.2642
252	rs7911876	T	C	T	C	M00060.metal.pos.txt.gz	IPF	0.0043	0.0079379	0.4276	0.43	0.0009	0.019142	2.757e-06	0.6784	7351	953873	0.0030957	22.8209
253	rs7923885	A	G	A	G	M00060.metal.pos.txt.gz	IPF	-0.0044	0.0096485	0.5257	0.5342	0.0009	0.018699	8.078e-07	0.6059	7351	953873	0.00324089	23.8947
254	rs8003702	T	G	T	G	M00060.metal.pos.txt.gz	IPF	0.0042	-0.013985	0.536	0.5389	0.0009	0.018761	2.446e-06	0.456	7351	953873	0.00295381	21.7719
255	rs825885	A	G	A	G	M00060.metal.pos.txt.gz	IPF	-0.0097	-0.032446	0.1469	0.2004	0.002	0.025276	1.558e-06	0.1993	7351	903869	0.0031897	23.5161
256	rs891878	T	G	T	G	M00060.metal.pos.txt.gz	IPF	-0.0041	-0.042432	0.4844	0.4744	0.0009	0.018692	6.034e-06	0.0232	7351	953873	0.00281522	20.7474
257	rs899273	T	C	T	C	M00060.metal.pos.txt.gz	IPF	0.0042	0.005764	0.5202	0.5146	0.0009	0.02007	3.334e-06	0.774	7351	903869	0.00295381	21.7719
258	rs923818	A	G	A	G	M00060.metal.pos.txt.gz	IPF	0.0041	-0.022741	0.5072	0.4948	0.0009	0.018728	6.232e-06	0.2246	7351	953873	0.00281522	20.7474
259	rs9292230	T	C	T	C	M00060.metal.pos.txt.gz	IPF	0.0041	0.047579	0.6218	0.6151	0.0009	0.020429	4.63e-06	0.01986	7351	937232	0.00281522	20.7474
260	rs9394683	T	C	T	C	M00060.metal.pos.txt.gz	IPF	-0.004	0.016578	0.5195	0.5204	0.0009	0.018729	9.054e-06	0.3761	7351	953873	0.00267993	19.7477
261	rs9403527	T	C	T	C	M00060.metal.pos.txt.gz	IPF	0.0045	-0.014091	0.3456	0.3453	0.0009	0.021287	9.914e-07	0.508	7351	903869	0.00338937	24.9932
262	rs9541214	T	C	T	C	M00060.metal.pos.txt.gz	IPF	-0.005	-0.0041275	0.6529	0.6571	0.0009	0.019578	3.4e-08	0.833	7351	953873	0.00418108	30.8558
263	rs9636889	A	G	A	G	M00060.metal.pos.txt.gz	IPF	0.0043	0.0043083	0.4879	0.4903	0.001	0.018789	7.746e-06	0.8186	7351	953873	0.00250899	18.485
264	rs982790	T	C	T	C	M00060.metal.pos.txt.gz	IPF	-0.0044	-0.017767	0.4106	0.4069	0.0009	0.020518	3.74e-06	0.3865	7351	903869	0.00324089	23.8947
265	rs9889080	A	G	A	G	M00060.metal.pos.txt.gz	IPF	0.0074	0.033201	0.1641	0.1663	0.0016	0.025003	4.211e-06	0.1842	7351	953873	0.00290145	21.3848
266	rs989960	T	C	T	C	M00060.metal.pos.txt.gz	IPF	0.0041	0.00056948	0.4175	0.4584	0.0009	0.018773	4.662e-06	0.9758	7351	953873	0.00281522	20.7474
267	rs9903421	T	C	T	C	M00060.metal.pos.txt.gz	IPF	-0.0041	0.016235	0.5633	0.5627	0.0009	0.02018	7.394e-06	0.4211	7351	903869	0.00281522	20.7474
273	rs1005596	A	G	A	G	M00063.metal.pos.txt.gz	IPF	0.0115	-0.002049	0.1014	0.08982	0.0025	0.031595	4.195e-06	0.9483	7365	953873	0.00286482	21.1543
274	rs10207315	T	G	T	G	M00063.metal.pos.txt.gz	IPF	0.0078	0.0050181	0.2432	0.2318	0.0017	0.021993	4.789e-06	0.8195	7365	953873	0.00285022	21.0462
275	rs10493549	A	G	A	G	M00063.metal.pos.txt.gz	IPF	-0.009	-0.017468	0.7989	0.8078	0.0017	0.023701	2.274e-07	0.4611	7365	953873	0.0037911	28.0201
276	rs1077834	T	C	T	C	M00063.metal.pos.txt.gz	IPF	-0.0113	-0.00075518	0.7912	0.7696	0.0023	0.022298	6.867e-07	0.973	7365	953873	0.00326669	24.1314
277	rs11022174	A	G	A	G	M00063.metal.pos.txt.gz	IPF	0.0101	-0.011002	0.295	0.3634	0.0023	0.021619	7.361e-06	0.6108	7365	903869	0.00261143	19.2783
278	rs11106131	T	G	T	G	M00063.metal.pos.txt.gz	IPF	-0.0089	0.041045	0.2379	0.2361	0.0019	0.024024	1.807e-06	0.08755	7365	903869	0.00297035	21.9359
279	rs11111293	T	C	T	C	M00063.metal.pos.txt.gz	IPF	-0.008	-0.0058458	0.7914	0.7773	0.0018	0.024146	6.118e-06	0.8087	7365	903869	0.00267485	19.7477
280	rs1124515	A	G	A	G	M00063.metal.pos.txt.gz	IPF	-0.0078	0.028554	0.2539	0.2516	0.0017	0.021776	6.006e-06	0.1898	7365	953873	0.00285022	21.0462
281	rs11610936	T	C	T	C	M00063.metal.pos.txt.gz	IPF	-0.0121	-0.0041534	0.0989	0.0979	0.0025	0.031553	1.343e-06	0.8953	7365	953873	0.00317058	23.4192
282	rs11813145	A	G	A	G	M00063.metal.pos.txt.gz	IPF	0.0076	-0.0062561	0.3414	0.3386	0.0017	0.019785	5.867e-06	0.7518	7365	953873	0.00270632	19.9807
283	rs12648765	A	G	A	G	M00063.metal.pos.txt.gz	IPF	0.0564	0.04235	0.9861	0.98455	0.0122	0.072864	3.568e-06	0.5611	1763	953873	0.0119771	21.3474
284	rs12881791	T	G	T	G	M00063.metal.pos.txt.gz	IPF	-0.0083	-0.013101	0.7603	0.7203	0.0018	0.022645	5.911e-06	0.5629	7365	903869	0.00287863	21.2566
285	rs12896813	T	C	T	C	M00063.metal.pos.txt.gz	IPF	-0.0082	0.02345	0.1853	0.1764	0.0018	0.024619	3.524e-06	0.3408	7365	953873	0.00280988	20.7475
286	rs1411983	A	T	A	T	M00063.metal.pos.txt.gz	IPF	-0.0073	-0.02089	0.594	0.6051	0.0017	0.020501	9.208e-06	0.3082	7365	903869	0.00249741	18.4344
287	rs1433904	T	C	T	C	M00063.metal.pos.txt.gz	IPF	0.0442	-0.036204	0.0228	0.02379	0.0097	0.058488	5.056e-06	0.5359	1763	953873	0.0116403	20.74
288	rs17182784	T	C	T	C	M00063.metal.pos.txt.gz	IPF	-0.0082	-0.025292	0.253	0.2854	0.0017	0.021115	2.1e-06	0.231	7365	953873	0.00314911	23.2601
289	rs17683567	T	C	T	C	M00063.metal.pos.txt.gz	IPF	0.0078	0.023004	0.2146	0.2087	0.0017	0.023001	7.567e-06	0.3172	7365	953873	0.00285022	21.0462
290	rs17728920	A	C	A	C	M00063.metal.pos.txt.gz	IPF	0.0081	0.032705	0.1768	0.1696	0.0018	0.02693	5.299e-06	0.2246	7365	903869	0.00274195	20.2445
291	rs17765253	A	G	A	G	M00063.metal.pos.txt.gz	IPF	0.0096	0.0015518	0.1845	0.2005	0.0018	0.025108	8.265e-08	0.9507	7365	903869	0.00384725	28.4367
292	rs2026590	T	G	T	G	M00063.metal.pos.txt.gz	IPF	0.008	-0.017619	0.2176	0.2121	0.0017	0.022801	3.764e-06	0.4397	7365	953873	0.00299782	22.1393
293	rs2259571	T	G	T	G	M00063.metal.pos.txt.gz	IPF	-0.0078	0.040368	0.6893	0.6532	0.0017	0.01968	2.864e-06	0.04024	7365	888793	0.00285022	21.0462
294	rs2407893	A	G	A	G	M00063.metal.pos.txt.gz	IPF	0.0079	0.0071356	0.427	0.4166	0.0016	0.01891	1.285e-06	0.7059	7365	953873	0.00329918	24.3723
295	rs2869804	A	G	A	G	M00063.metal.pos.txt.gz	IPF	0.0078	0.039131	0.2489	0.2465	0.0017	0.025287	6.503e-06	0.1217	7365	887228	0.00285022	21.0462
296	rs2870664	T	C	T	C	M00063.metal.pos.txt.gz	IPF	0.0147	-0.011377	0.4767	0.4309	0.0031	0.018863	1.602e-06	0.5464	1763	953873	0.0125937	22.4604
297	rs3747924	T	C	T	C	M00063.metal.pos.txt.gz	IPF	0.0083	0.0022091	0.1781	0.1782	0.0018	0.025773	4.243e-06	0.9317	7365	903869	0.00287863	21.2566
298	rs3897960	A	T	A	T	M00063.metal.pos.txt.gz	IPF	-0.0084	-0.035614	0.2083	0.2027	0.0017	0.02468	1.287e-06	0.149	7365	903869	0.00330408	24.4086
299	rs4602115	T	G	T	G	M00063.metal.pos.txt.gz	IPF	0.0146	-0.020538	0.7133	0.7345	0.0033	0.0229	7.651e-06	0.3698	1763	903869	0.0109807	19.5517
300	rs602633	T	G	T	G	M00063.metal.pos.txt.gz	IPF	-0.0102	0.0081303	0.2163	0.2199	0.0017	0.022533	5.024e-09	0.7182	7365	953873	0.00486421	35.9902
301	rs6511720	T	G	T	G	M00063.metal.pos.txt.gz	IPF	-0.0136	-0.00078574	0.1197	0.1095	0.0027	0.029023	3.688e-07	0.9784	7365	953873	0.00343308	25.3649
302	rs6573766	T	G	T	G	M00063.metal.pos.txt.gz	IPF	-0.0085	-0.044331	0.8061	0.7824	0.0018	0.023055	1.549e-06	0.0545	7365	953873	0.00301861	22.2933
303	rs6603141	A	G	A	G	M00063.metal.pos.txt.gz	IPF	-0.0081	0.017272	0.258	0.2484	0.0017	0.021354	2.608e-06	0.4186	7365	953873	0.003073	22.6963
304	rs6970076	T	C	T	C	M00063.metal.pos.txt.gz	IPF	-0.0079	0.02201	0.7679	0.7443	0.0017	0.02149	4.366e-06	0.3057	7365	953873	0.00292356	21.5893
305	rs886282	T	C	T	C	M00063.metal.pos.txt.gz	IPF	0.0081	-0.011882	0.1989	0.2184	0.0018	0.024681	3.711e-06	0.6302	7365	903869	0.00274195	20.2445
306	rs927961	T	G	T	G	M00063.metal.pos.txt.gz	IPF	-0.0079	-0.001684	0.7597	0.7631	0.0017	0.025699	5.057e-06	0.9478	7365	887228	0.00292356	21.5893
312	rs10050054	T	C	T	C	M00064.metal.pos.txt.gz	IPF	-0.0325	0.026937	0.9828	0.9861	0.0069	0.083137	2.583e-06	0.7459	1760	937232	0.0124485	22.1603
313	rs1498694	A	G	A	G	M00064.metal.pos.txt.gz	IPF	0.0075	-0.0042179	0.4035	0.3936	0.0011	0.019077	7.336e-11	0.825	7354	953873	0.00628169	46.475
314	rs2905873	A	C	A	C	M00064.metal.pos.txt.gz	IPF	0.0055	0.02592	0.6858	0.6973	0.0012	0.024235	2.966e-06	0.2848	7354	887228	0.0028484	21.0012
315	rs6831907	T	C	T	C	M00064.metal.pos.txt.gz	IPF	0.0206	-0.022677	0.0395	0.03851	0.0046	0.048518	7.053e-06	0.6402	1760	953873	0.0112664	20.032
321	rs10426415	A	G	A	G	M00513.metal.pos.txt.gz	IPF	-0.0086	-0.016617	0.878	0.8614	0.0018	0.029096	3.109e-06	0.5679	7361	903869	0.00309151	22.821
322	rs10519445	A	G	A	G	M00513.metal.pos.txt.gz	IPF	-0.0045	0.011681	0.5338	0.5273	0.0009	0.018732	1.846e-06	0.5329	7361	953873	0.00338478	24.9932
323	rs11054328	T	C	T	C	M00513.metal.pos.txt.gz	IPF	0.0088	-0.014932	0.1072	0.09817	0.0018	0.03316	1.456e-06	0.6525	7361	903869	0.0032365	23.8947
324	rs1116866	T	C	T	C	M00513.metal.pos.txt.gz	IPF	0.0094	0.019637	0.1035	0.1052	0.0018	0.03084	2.866e-07	0.5243	7361	953873	0.0036912	27.2642
325	rs11638382	T	C	T	C	M00513.metal.pos.txt.gz	IPF	-0.0171	0.014183	0.1875	0.1752	0.0038	0.027448	5.062e-06	0.6053	1763	937232	0.0113557	20.227
326	rs12175103	A	C	A	C	M00513.metal.pos.txt.gz	IPF	0.0048	0.025681	0.4153	0.434	0.0009	0.020163	4.863e-07	0.2028	7361	903869	0.00384933	28.4367
327	rs12324230	T	C	T	C	M00513.metal.pos.txt.gz	IPF	0.0042	-0.020037	0.5209	0.5161	0.0009	0.018639	8.677e-06	0.2824	7361	953873	0.00294981	21.7719
328	rs12801550	T	C	T	C	M00513.metal.pos.txt.gz	IPF	0.0088	-0.032982	0.8705	0.8701	0.0018	0.030035	9.639e-07	0.2722	7361	903869	0.0032365	23.8947
329	rs13031396	T	G	T	G	M00513.metal.pos.txt.gz	IPF	-0.0076	0.020653	0.2473	0.2482	0.0017	0.02175	9.166e-06	0.3424	7361	953873	0.00270779	19.9807
330	rs1374355	A	T	A	T	M00513.metal.pos.txt.gz	IPF	0.0083	0.0056682	0.1077	0.1103	0.0019	0.029275	8.594e-06	0.8465	7361	953873	0.00258576	19.0779
331	rs1990178	T	C	T	C	M00513.metal.pos.txt.gz	IPF	-0.0164	-0.01097	0.1943	0.2297	0.0036	0.022382	6.272e-06	0.624	1763	953873	0.0116345	20.7295
332	rs2042499	A	C	A	C	M00513.metal.pos.txt.gz	IPF	0.0052	-0.0032463	0.4837	0.4834	0.0009	0.020007	4.883e-08	0.8711	7361	903869	0.0045146	33.3736
333	rs2048277	A	G	A	G	M00513.metal.pos.txt.gz	IPF	0.0083	0.0083856	0.8956	0.91547	0.0019	0.032122	8.751e-06	0.7941	7361	953873	0.00258576	19.0779
334	rs2289804	A	G	A	G	M00513.metal.pos.txt.gz	IPF	-0.0143	0.048925	0.9343	0.92547	0.0027	0.03837	1.246e-07	0.2023	7361	903869	0.00379626	28.0431
335	rs2521310	T	C	T	C	M00513.metal.pos.txt.gz	IPF	0.009	-0.035797	0.874	0.8451	0.002	0.026053	6.795e-06	0.1694	5598	953873	0.00360433	20.2428
336	rs394282	A	T	A	T	M00513.metal.pos.txt.gz	IPF	-0.0163	0.054879	0.1112	0.08068	0.0033	0.035121	1.016e-06	0.1182	1763	953873	0.0136498	24.3699
337	rs4460629	T	C	T	C	M00513.metal.pos.txt.gz	IPF	-0.0045	-0.038757	0.5224	0.5088	0.001	0.018655	2.205e-06	0.03775	7361	953873	0.00274344	20.2445
338	rs6502247	A	G	A	G	M00513.metal.pos.txt.gz	IPF	-0.009	0.036361	0.119	0.123	0.002	0.034259	6.795e-06	0.2885	5598	887228	0.00360433	20.2428
339	rs9312777	T	C	T	C	M00513.metal.pos.txt.gz	IPF	0.0043	-0.037278	0.4788	0.4588	0.0009	0.018931	4.677e-06	0.04894	7361	953873	0.00309151	22.821
340	rs9456538	A	G	A	G	M00513.metal.pos.txt.gz	IPF	-0.0082	-0.037162	0.1493	0.1672	0.0018	0.025252	4.198e-06	0.1411	7361	953873	0.0028114	20.7474
346	rs10788232	T	C	T	C	M00527.metal.pos.txt.gz	IPF	-0.0111	-0.016257	0.6825	0.6449	0.0024	0.02261	2.464e-06	0.4721	7365	887228	0.00289595	21.3848
347	rs1193345	A	G	A	G	M00527.metal.pos.txt.gz	IPF	-0.0216	-0.075887	0.9357	0.9261	0.0045	0.042068	1.434e-06	0.07125	7365	887228	0.00311855	23.0337
348	rs1330523	A	G	A	G	M00527.metal.pos.txt.gz	IPF	-0.0117	0.0051987	0.2326	0.217	0.0024	0.022452	1.561e-06	0.8169	7365	953873	0.00321645	23.7592
349	rs13403441	A	T	A	T	M00527.metal.pos.txt.gz	IPF	-0.0235	0.017412	0.8588	0.8729	0.0048	0.030928	1.019e-06	0.5734	1761	621641	0.0134283	23.942
350	rs1876100	A	T	A	T	M00527.metal.pos.txt.gz	IPF	-0.0106	0.011415	0.2626	0.3127	0.0024	0.023523	9.204e-06	0.6275	7365	887228	0.0026416	19.5016
351	rs3785024	A	G	A	G	M00527.metal.pos.txt.gz	IPF	-0.0223	-0.011493	0.9469	0.94333	0.0049	0.039757	5.562e-06	0.7725	7365	953873	0.0028043	20.7062
352	rs4635489	A	G	A	G	M00527.metal.pos.txt.gz	IPF	0.0364	0.045334	0.0177	0.02462	0.008	0.062916	5.663e-06	0.4712	7365	953873	0.00280305	20.6969
353	rs4718532	T	C	T	C	M00527.metal.pos.txt.gz	IPF	-0.016	-0.0028498	0.5052	0.507	0.0035	0.018621	6.605e-06	0.8784	1761	953873	0.0117279	20.8742
354	rs723526	A	G	A	G	M00527.metal.pos.txt.gz	IPF	-0.011	-0.032017	0.1994	0.1857	0.0024	0.023854	6.624e-06	0.1795	7365	953873	0.00284415	21.0012
355	rs780093	T	C	T	C	M00527.metal.pos.txt.gz	IPF	0.0117	0.0031737	0.4	0.3766	0.0023	0.019175	1.887e-07	0.8685	7365	953873	0.00350123	25.8701
361	rs11224003	A	G	A	G	M00542.metal.pos.txt.gz	IPF	0.0419	-0.011567	0.177	0.1983	0.0093	0.023269	7.072e-06	0.6191	7371	953873	0.00274626	20.2929
362	rs2295758	T	C	T	C	M00542.metal.pos.txt.gz	IPF	-0.1137	0.0878	0.9754	0.97412	0.0255	0.059468	8.568e-06	0.1398	7371	953873	0.00268995	19.8757
363	rs4297577	T	C	T	C	M00542.metal.pos.txt.gz	IPF	0.0977	-0.031297	0.0384	0.04719	0.0209	0.044851	2.938e-06	0.4853	7371	953873	0.00295586	21.8463
364	rs4838537	T	C	T	C	M00542.metal.pos.txt.gz	IPF	0.3226	0.12124	0.0133	0.02955	0.0699	0.056607	3.964e-06	0.03221	1766	903869	0.0119173	21.2756
365	rs6493912	T	C	T	C	M00542.metal.pos.txt.gz	IPF	-0.0368	0.048307	0.7431	0.7389	0.0081	0.021286	5.359e-06	0.02324	7371	953873	0.00279245	20.6352
366	rs8000457	T	C	T	C	M00542.metal.pos.txt.gz	IPF	-0.2093	-0.050335	0.9661	0.93316	0.0433	0.035947	1.351e-06	0.1614	1766	953873	0.0130576	23.3384
372	rs1176413	T	C	T	C	M00553.metal.pos.txt.gz	IPF	-0.1032	0.007002	0.1873	0.1809	0.0219	0.024131	2.545e-06	0.7717	1233	953873	0.0176912	22.17
373	rs12440014	C	G	C	G	M00553.metal.pos.txt.gz	IPF	0.1008	0.021491	0.7673	0.7498	0.0213	0.021671	2.18e-06	0.3213	1233	953873	0.0178394	22.3592
374	rs1605457	T	C	T	C	M00553.metal.pos.txt.gz	IPF	0.3731	-0.0065645	0.9643	0.9357	0.08	0.041217	3.097e-06	0.8735	283	903869	0.0713717	21.5968
375	rs17800513	T	G	T	G	M00553.metal.pos.txt.gz	IPF	-0.1308	-0.034256	0.1085	0.1202	0.0273	0.02945	1.575e-06	0.2448	1233	953873	0.0182775	22.9184
376	rs1818902	T	C	T	C	M00553.metal.pos.txt.gz	IPF	0.5718	0.014702	0.9701	0.985	0.1255	0.093387	5.205e-06	0.8749	283	887228	0.0683395	20.612
377	rs2075317	T	C	T	C	M00553.metal.pos.txt.gz	IPF	0.0732	-0.020161	0.5417	0.5413	0.0165	0.020225	9.187e-06	0.3189	1233	903869	0.0157114	19.6494
378	rs2211372	T	C	T	C	M00553.metal.pos.txt.gz	IPF	0.3317	0.095196	0.985	0.98634	0.0696	0.075799	1.869e-06	0.2091	1233	953873	0.0180876	22.6761
379	rs2234233	A	G	A	G	M00553.metal.pos.txt.gz	IPF	-0.1234	0.024594	0.135	0.1728	0.0248	0.024794	6.376e-07	0.3212	1233	953873	0.0196847	24.7185
380	rs6816298	A	G	A	G	M00553.metal.pos.txt.gz	IPF	0.1842	0.018375	0.8254	0.8138	0.0403	0.023792	4.76e-06	0.4399	283	953873	0.0687465	20.7438
381	rs7482087	T	C	T	C	M00553.metal.pos.txt.gz	IPF	-0.5162	-0.049377	0.0254	0.033	0.1064	0.058331	1.237e-06	0.3973	283	937232	0.0767838	23.3707
382	rs7701941	C	G	C	G	M00553.metal.pos.txt.gz	IPF	-0.5561	-0.0046664	0.0194	0.01907	0.1115	0.067277	6.097e-07	0.9447	283	953873	0.0807946	24.6988
383	rs9614985	A	G	A	G	M00553.metal.pos.txt.gz	IPF	-0.0855	-0.0012752	0.4177	0.4297	0.0177	0.018887	1.283e-06	0.9462	1233	953873	0.0185729	23.296
389	rs1039293	A	G	A	G	M00569.metal.pos.txt.gz	IPF	0.0709	-0.014647	0.4948	0.4725	0.0153	0.018753	3.393e-06	0.4348	1713	953873	0.0123806	21.4488
390	rs10935899	C	G	C	G	M00569.metal.pos.txt.gz	IPF	-0.0506	-0.013458	0.8197	0.8175	0.011	0.024015	4.539e-06	0.5752	7274	953873	0.00290055	21.1542
391	rs1397829	A	G	A	G	M00569.metal.pos.txt.gz	IPF	0.042	-0.0034949	0.5328	0.5246	0.0085	0.020255	7.076e-07	0.863	7274	903869	0.00334528	24.4085
392	rs16902976	T	G	T	G	M00569.metal.pos.txt.gz	IPF	-0.1325	0.012609	0.0232	0.03158	0.0294	0.052203	6.361e-06	0.8091	7274	953873	0.00278454	20.3057
393	rs2446427	T	C	T	C	M00569.metal.pos.txt.gz	IPF	-0.0554	-0.0079296	0.8371	0.8525	0.0122	0.027796	5.211e-06	0.7754	7274	903869	0.00282681	20.6149
394	rs2472297	T	C	T	C	M00569.metal.pos.txt.gz	IPF	-0.0668	-0.035043	0.2362	0.2567	0.0104	0.021831	1.502e-10	0.1085	7274	953873	0.00563971	41.2446
395	rs2493277	C	G	C	G	M00569.metal.pos.txt.gz	IPF	0.0605	-0.007279	0.6552	0.6218	0.0127	0.022811	1.914e-06	0.7497	7274	887228	0.00311012	22.6874
396	rs384814	A	G	A	G	M00569.metal.pos.txt.gz	IPF	0.1452	-0.05665	0.0255	0.09065	0.0326	0.038978	8.35e-06	0.1461	7274	755859	0.00271983	19.8326
397	rs8096497	A	G	A	G	M00569.metal.pos.txt.gz	IPF	0.089	-0.032607	0.097	0.1224	0.0163	0.046278	4.836e-08	0.4811	5561	481279	0.00533249	29.8022
398	rs946712	A	C	A	C	M00569.metal.pos.txt.gz	IPF	0.1039	0.0078993	0.9559	0.9606	0.0212	0.04895	9.586e-07	0.8718	7274	903869	0.0032912	24.0126
404	rs12091176	A	G	A	G	M00575.metal.pos.txt.gz	IPF	0.127	-0.016757	0.0264	0.2038	0.0271	0.029627	2.814e-06	0.5717	1002	686638	0.0214479	21.918
405	rs12426131	A	G	A	G	M00575.metal.pos.txt.gz	IPF	0.0246	-0.033749	0.1446	0.1598	0.0051	0.0271	1.681e-06	0.213	5502	903869	0.00421092	23.258
406	rs33976862	C	G	C	G	M00575.metal.pos.txt.gz	IPF	0.0602	0.021182	0.0674	0.07066	0.0135	0.036149	7.764e-06	0.5579	1002	953873	0.0194591	19.8453
407	rs526744	T	C	T	C	M00575.metal.pos.txt.gz	IPF	-0.021	-0.028854	0.243	0.2362	0.0042	0.023374	7.141e-07	0.217	4500	937232	0.00552486	24.9889
421	rs10736	T	C	T	C	M00584.metal.pos.txt.gz	IPF	-0.0118	0.0023959	0.2011	0.207	0.0026	0.02316	4.731e-06	0.9176	7345	953873	0.00279646	20.592
422	rs10982244	A	G	A	G	M00584.metal.pos.txt.gz	IPF	-0.0177	-0.012984	0.6098	0.5885	0.004	0.019171	8.931e-06	0.4982	1754	953873	0.0110402	19.5583
423	rs11676911	A	G	A	G	M00584.metal.pos.txt.gz	IPF	-0.0429	0.055597	0.0216	0.03258	0.0084	0.062131	3.659e-07	0.3709	7345	887228	0.00353854	26.0758
424	rs12218544	C	G	C	G	M00584.metal.pos.txt.gz	IPF	-0.019	0.011394	0.0836	0.1002	0.0039	0.033499	1.28e-06	0.7338	7345	903869	0.00322096	23.7279
425	rs1260326	T	C	T	C	M00584.metal.pos.txt.gz	IPF	-0.0439	-0.0030237	0.4088	0.3825	0.0024	0.019156	1.296e-77	0.8746	7345	953873	0.0435681	334.494
426	rs16932803	T	G	T	G	M00584.metal.pos.txt.gz	IPF	-0.0121	-0.027648	0.1673	0.1555	0.0026	0.027262	5.005e-06	0.3105	7345	903869	0.00294004	21.6524
427	rs17061914	A	G	A	G	M00584.metal.pos.txt.gz	IPF	-0.0146	-0.02431	0.8581	0.8424	0.0033	0.025556	8.766e-06	0.3415	7345	953873	0.00265785	19.5686
428	rs1841535	T	G	T	G	M00584.metal.pos.txt.gz	IPF	0.0252	0.014541	0.1482	0.267	0.0056	0.021107	6.998e-06	0.4909	1754	953873	0.0114133	20.2269
429	rs2272172	T	C	T	C	M00584.metal.pos.txt.gz	IPF	-0.0648	-0.11603	0.0226	0.01717	0.0145	0.06832	7.508e-06	0.08944	1754	953873	0.0112582	19.9489
430	rs2723713	T	C	T	C	M00584.metal.pos.txt.gz	IPF	-0.0356	0.055092	0.0254	0.0386	0.008	0.049991	9.19e-06	0.2704	7345	953873	0.0026888	19.7971
431	rs435315	A	T	A	T	M00584.metal.pos.txt.gz	IPF	-0.0121	0.027493	0.2033	0.2162	0.0026	0.022758	2.18e-06	0.227	7345	953873	0.00294004	21.6524
432	rs7007251	A	G	A	G	M00584.metal.pos.txt.gz	IPF	-0.015	-0.019936	0.1057	0.09376	0.0034	0.031101	8.76e-06	0.5215	7345	953873	0.00264292	19.4584
433	rs7747345	A	T	A	T	M00584.metal.pos.txt.gz	IPF	0.0122	0.014404	0.8153	0.81	0.0026	0.023702	2.524e-06	0.5434	7345	953873	0.00298869	22.0118
434	rs991670	T	C	T	C	M00584.metal.pos.txt.gz	IPF	-0.0111	-0.0088086	0.6624	0.6629	0.0025	0.021244	7.476e-06	0.6784	7345	903869	0.00267676	19.7082
440	rs10237319	T	C	T	C	M00599.metal.pos.txt.gz	IPF	0.0226	0.013084	0.1467	0.1609	0.0051	0.02569	9.785e-06	0.6106	7237	953873	0.00270608	19.6316
441	rs11038739	A	T	A	T	M00599.metal.pos.txt.gz	IPF	-0.0203	-0.017252	0.7937	0.7845	0.0043	0.022895	3.009e-06	0.4511	7237	953873	0.00307016	22.281
442	rs11216267	T	C	T	C	M00599.metal.pos.txt.gz	IPF	0.0168	0.0083014	0.6435	0.6167	0.0035	0.019418	1.56e-06	0.669	7237	953873	0.00317354	23.0336
443	rs11259923	A	G	A	G	M00599.metal.pos.txt.gz	IPF	0.042	-0.0083867	0.8139	0.8025	0.0091	0.023527	3.916e-06	0.7215	1723	953873	0.0122122	21.277
444	rs1133034	T	C	T	C	M00599.metal.pos.txt.gz	IPF	0.032	0.040038	0.0757	0.07186	0.0069	0.035396	3.906e-06	0.258	7237	953873	0.00296316	21.5021
445	rs12515830	T	G	T	G	M00599.metal.pos.txt.gz	IPF	0.0244	0.0053331	0.8744	0.8751	0.0054	0.030504	5.788e-06	0.8612	7237	903869	0.00281326	20.4114
446	rs2833657	A	G	A	G	M00599.metal.pos.txt.gz	IPF	0.0239	0.035633	0.8254	0.8342	0.0051	0.024814	3.023e-06	0.151	7237	953873	0.00302539	21.9551
447	rs2964063	T	C	T	C	M00599.metal.pos.txt.gz	IPF	-0.0735	-0.16311	0.9853	0.9842	0.0155	0.077708	2.249e-06	0.03581	7237	937232	0.00309746	22.4797
448	rs3925033	T	G	T	G	M00599.metal.pos.txt.gz	IPF	-0.0164	0.003722	0.4591	0.4295	0.0035	0.018836	2.593e-06	0.8434	7237	953873	0.00302467	21.9499
449	rs4648464	A	G	A	G	M00599.metal.pos.txt.gz	IPF	-0.0161	-0.0057204	0.5522	0.5654	0.0036	0.02236	9.373e-06	0.7981	7237	887228	0.00275607	19.9952
450	rs6895278	T	C	T	C	M00599.metal.pos.txt.gz	IPF	0.0168	-0.018205	0.3354	0.3593	0.0037	0.021248	4.133e-06	0.3916	7237	903869	0.00284067	20.6108
451	rs924483	A	G	A	G	M00599.metal.pos.txt.gz	IPF	-0.0289	-0.0016673	0.0916	0.09934	0.0062	0.034152	3.254e-06	0.9611	7237	903869	0.00299331	21.7216
457	rs1007797	T	C	T	C	M00606.metal.pos.txt.gz	IPF	-0.0092	0.041162	0.879	0.8894	0.0018	0.032184	6.491e-07	0.2009	7354	769651	0.0035397	26.1164
458	rs11033504	A	G	A	G	M00606.metal.pos.txt.gz	IPF	0.0143	-0.035645	0.9307	0.92834	0.0027	0.035526	9.462e-08	0.3157	7354	953873	0.00379986	28.0431
459	rs11607704	T	C	T	C	M00606.metal.pos.txt.gz	IPF	0.0093	-0.085672	0.8783	0.882	0.0019	0.029066	6.939e-07	0.003203	7354	953873	0.0032473	23.9519
460	rs11705028	A	G	A	G	M00606.metal.pos.txt.gz	IPF	-0.0206	-0.022934	0.0859	0.09806	0.0046	0.031287	8.848e-06	0.4635	7354	953873	0.00271965	20.0494
461	rs12524738	A	G	A	G	M00606.metal.pos.txt.gz	IPF	0.0156	0.020449	0.069	0.1161	0.0035	0.032141	6.931e-06	0.5246	7354	903869	0.00269413	19.8607
462	rs12544733	C	G	C	G	M00606.metal.pos.txt.gz	IPF	-0.0084	-0.012517	0.8378	0.8362	0.0018	0.025136	2.741e-06	0.6185	7354	953873	0.00295261	21.7719
463	rs12580704	T	C	T	C	M00606.metal.pos.txt.gz	IPF	0.0085	-0.025173	0.1328	0.1223	0.0018	0.027967	4.553e-06	0.3681	7354	953873	0.00302311	22.2933
464	rs1482928	T	G	T	G	M00606.metal.pos.txt.gz	IPF	0.0081	0.014647	0.7912	0.8063	0.0018	0.024998	4.415e-06	0.5579	7354	903869	0.00274604	20.2445
465	rs163425	A	G	A	G	M00606.metal.pos.txt.gz	IPF	0.0086	0.014718	0.8734	0.8795	0.0018	0.028622	2.617e-06	0.6071	7354	953873	0.00309444	22.821
466	rs2686796	T	C	T	C	M00606.metal.pos.txt.gz	IPF	0.0094	-0.017831	0.4524	0.4612	0.0017	0.020146	1.889e-08	0.3761	7354	903869	0.00414031	30.5661
467	rs2982907	T	G	T	G	M00606.metal.pos.txt.gz	IPF	-0.0088	0.045234	0.1465	0.1351	0.0018	0.027039	1.281e-06	0.09435	7354	953873	0.00323957	23.8947
468	rs6988242	T	G	T	G	M00606.metal.pos.txt.gz	IPF	0.0094	-0.0071596	0.769	0.7283	0.0018	0.024695	1.308e-07	0.7719	7354	887228	0.0036947	27.2642
469	rs7593385	A	C	A	C	M00606.metal.pos.txt.gz	IPF	0.0359	0.20833	0.9685	0.9916	0.008	0.10229	6.873e-06	0.0417	1766	937232	0.0112744	20.1149
470	rs7948201	T	C	T	C	M00606.metal.pos.txt.gz	IPF	-0.023	-0.020503	0.9623	0.92899	0.0046	0.035441	6.769e-07	0.5629	7354	953873	0.00338799	24.9932
471	rs9601054	T	C	T	C	M00606.metal.pos.txt.gz	IPF	0.0083	-0.026062	0.162	0.153	0.0018	0.025315	4.237e-06	0.3033	7354	953873	0.00288293	21.2566
472	rs977712	A	C	A	C	M00606.metal.pos.txt.gz	IPF	-0.0085	0.021674	0.8633	0.8563	0.0019	0.031885	6.319e-06	0.4966	7354	887228	0.00271411	20.0084
478	rs12238083	T	C	T	C	M01105.metal.pos.txt.gz	IPF	0.0152	-0.021246	0.1389	0.1259	0.0033	0.027372	3.008e-06	0.4376	7333	953873	0.00288485	21.21
479	rs12336893	T	G	T	G	M01105.metal.pos.txt.gz	IPF	0.0289	-0.054215	0.9588	0.9511	0.0062	0.04185	2.677e-06	0.1952	7333	953873	0.00295424	21.7217
480	rs13225022	A	G	A	G	M01105.metal.pos.txt.gz	IPF	-0.0123	-0.0014872	0.6784	0.6182	0.0026	0.0194	1.402e-06	0.9389	7333	953873	0.00304269	22.3741
481	rs13280152	T	G	T	G	M01105.metal.pos.txt.gz	IPF	0.0162	0.027682	0.1202	0.1232	0.0033	0.028528	1.224e-06	0.3319	7333	953873	0.00327564	24.0926
482	rs1477025	T	C	T	C	M01105.metal.pos.txt.gz	IPF	0.0109	0.002303	0.6545	0.64	0.0024	0.020846	7.625e-06	0.912	7333	903869	0.00280497	20.6211
483	rs1502520	T	G	T	G	M01105.metal.pos.txt.gz	IPF	0.0119	-0.029069	0.7334	0.7416	0.0025	0.021094	1.634e-06	0.1682	7333	953873	0.0030803	22.6514
484	rs16911296	A	G	A	G	M01105.metal.pos.txt.gz	IPF	-0.0209	0.021499	0.0771	0.08881	0.0045	0.033641	4.18e-06	0.5228	7333	953873	0.00293299	21.565
485	rs17087487	A	G	A	G	M01105.metal.pos.txt.gz	IPF	-0.0231	0.013691	0.053	0.0714	0.0052	0.03768	7.997e-06	0.7163	7333	953873	0.00268391	19.7287
486	rs1956129	T	C	T	C	M01105.metal.pos.txt.gz	IPF	-0.0127	-0.013786	0.7589	0.7671	0.0025	0.021983	3.657e-07	0.5306	7333	953873	0.00350687	25.7994
487	rs2158555	C	G	C	G	M01105.metal.pos.txt.gz	IPF	-0.0337	-0.0028969	0.0331	0.02052	0.0075	0.067845	7.905e-06	0.9659	7333	903869	0.00274575	20.1845
488	rs2242415	A	C	A	C	M01105.metal.pos.txt.gz	IPF	0.0109	0.020466	0.6233	0.6338	0.0024	0.01953	8.242e-06	0.2947	7333	953873	0.00280497	20.6211
489	rs4654501	A	G	A	G	M01105.metal.pos.txt.gz	IPF	0.0111	0.034933	0.7671	0.7847	0.0025	0.024093	9.227e-06	0.1471	7333	903869	0.00268113	19.7082
490	rs6075489	A	G	A	G	M01105.metal.pos.txt.gz	IPF	0.0113	-0.014776	0.7177	0.7071	0.0025	0.022369	9.513e-06	0.5089	7333	903869	0.00277835	20.4248
491	rs7014120	A	G	A	G	M01105.metal.pos.txt.gz	IPF	0.0148	0.020708	0.1341	0.1451	0.0033	0.026585	5.666e-06	0.436	7333	953873	0.00273542	20.1084
492	rs7898173	A	G	A	G	M01105.metal.pos.txt.gz	IPF	-0.0143	0.055752	0.1419	0.1552	0.0032	0.026575	6.806e-06	0.03591	7333	953873	0.00271587	19.9643
498	rs10492266	T	C	T	C	M01107.metal.pos.txt.gz	IPF	-0.0167	-0.031021	0.4255	0.4052	0.0038	0.018998	8.776e-06	0.1025	5344	953873	0.00360108	19.3065
499	rs10771223	A	G	A	G	M01107.metal.pos.txt.gz	IPF	0.0237	-0.013448	0.78	0.7469	0.0046	0.021438	2.871e-07	0.5305	5344	953873	0.00494268	26.535
500	rs12132798	C	G	C	G	M01107.metal.pos.txt.gz	IPF	0.0615	-0.038841	0.9749	0.97235	0.013	0.055001	2.086e-06	0.4801	5344	953873	0.00417044	22.3718
501	rs12189555	A	T	A	T	M01107.metal.pos.txt.gz	IPF	0.021	0.026929	0.7684	0.7719	0.0046	0.023974	5.058e-06	0.2613	5344	903869	0.00388478	20.8334
502	rs12718598	T	C	T	C	M01107.metal.pos.txt.gz	IPF	0.018	0.0042075	0.5178	0.5436	0.0037	0.019989	1.491e-06	0.8333	5344	903869	0.00440916	23.6581
503	rs1320934	A	T	A	T	M01107.metal.pos.txt.gz	IPF	0.1215	0.060124	0.9599	0.94976	0.0253	0.045416	1.513e-06	0.1856	736	903869	0.0303832	23.0001
504	rs1431793	A	C	A	C	M01107.metal.pos.txt.gz	IPF	-0.0216	0.0032038	0.7526	0.7336	0.0046	0.024709	2.901e-06	0.8968	5344	887228	0.00410901	22.0409
505	rs1447307	T	G	T	G	M01107.metal.pos.txt.gz	IPF	-0.0211	-0.047706	0.227	0.2373	0.0046	0.022383	5.694e-06	0.03306	5344	953873	0.00392172	21.0323
506	rs1499094	T	G	T	G	M01107.metal.pos.txt.gz	IPF	0.0208	-0.004675	0.7686	0.7601	0.0046	0.02191	7.676e-06	0.831	5344	953873	0.00381141	20.4385
507	rs167277	A	C	A	C	M01107.metal.pos.txt.gz	IPF	-0.0207	-0.0036803	0.781	0.7867	0.0046	0.0228	7.922e-06	0.8718	5344	953873	0.00377499	20.2424
508	rs1799412	C	G	C	G	M01107.metal.pos.txt.gz	IPF	-0.0262	-0.00031066	0.8394	0.8193	0.0055	0.02599	2.28e-06	0.9905	5344	903869	0.00422835	22.6837
509	rs2293319	T	C	T	C	M01107.metal.pos.txt.gz	IPF	-0.0219	-0.0069737	0.7852	0.7786	0.0047	0.022463	3.591e-06	0.7562	5344	953873	0.00404637	21.7035
510	rs2549842	T	C	T	C	M01107.metal.pos.txt.gz	IPF	-0.0206	0.019059	0.786	0.7495	0.0046	0.021885	8.675e-06	0.3838	5344	953873	0.00373874	20.0473
511	rs8108144	T	G	T	G	M01107.metal.pos.txt.gz	IPF	-0.0232	-0.016629	0.788	0.8005	0.0047	0.025141	6.444e-07	0.5083	5344	937232	0.00453877	24.3567
512	rs8184921	T	C	T	C	M01107.metal.pos.txt.gz	IPF	0.0165	0.037988	0.5087	0.4712	0.0037	0.020454	9.801e-06	0.06328	5344	903869	0.00370753	19.8793
513	rs972709	A	C	A	C	M01107.metal.pos.txt.gz	IPF	0.0483	-0.043842	0.6548	0.6612	0.0107	0.019663	6.73e-06	0.02577	736	953873	0.0269395	20.321
514	rs9834988	T	C	T	C	M01107.metal.pos.txt.gz	IPF	0.0185	-0.033654	0.5297	0.5035	0.0038	0.018791	7.983e-07	0.0733	5344	953873	0.00441558	23.6927
520	rs1010069	A	G	A	G	M01110.metal.pos.txt.gz	IPF	0.0081	-0.00021894	0.4623	0.4385	0.0018	0.020036	8.583e-06	0.9913	7367	903869	0.00274121	20.2445
521	rs10241964	A	G	A	G	M01110.metal.pos.txt.gz	IPF	0.0182	-0.067941	0.0952	0.0968	0.0035	0.030971	2.247e-07	0.02826	7367	953873	0.003657	27.0327
522	rs10514491	T	C	T	C	M01110.metal.pos.txt.gz	IPF	0.012	-0.00031646	0.6782	0.6832	0.0026	0.02171	2.859e-06	0.9884	7367	903869	0.00288318	21.296
523	rs11837423	A	G	A	G	M01110.metal.pos.txt.gz	IPF	0.0385	-0.0036799	0.088	0.07763	0.008	0.035177	1.519e-06	0.9167	1766	953873	0.0129447	23.1339
524	rs12352829	A	G	A	G	M01110.metal.pos.txt.gz	IPF	-0.0134	0.038829	0.1506	0.1538	0.0027	0.028151	5.843e-07	0.1678	7367	903869	0.00333228	24.6243
525	rs12532113	T	C	T	C	M01110.metal.pos.txt.gz	IPF	-0.028	-0.033161	0.961	0.97053	0.006	0.05345	3.061e-06	0.535	5601	953873	0.00387314	21.77
526	rs1430209	T	C	T	C	M01110.metal.pos.txt.gz	IPF	-0.0086	-0.013602	0.5313	0.5347	0.0018	0.020041	1.865e-06	0.4973	7367	903869	0.003089	22.821
527	rs17099239	A	G	A	G	M01110.metal.pos.txt.gz	IPF	-0.012	-0.0073162	0.8327	0.8131	0.0027	0.024525	6.74e-06	0.7655	7367	953873	0.00267412	19.7477
528	rs180022	T	C	T	C	M01110.metal.pos.txt.gz	IPF	0.0117	-0.040569	0.8328	0.8252	0.0026	0.026863	9.431e-06	0.131	7367	903869	0.00274121	20.2445
529	rs2275351	T	C	T	C	M01110.metal.pos.txt.gz	IPF	0.012	-0.051736	0.1657	0.1335	0.0027	0.028447	7.062e-06	0.06896	7367	903869	0.00267412	19.7477
530	rs3798211	A	C	A	C	M01110.metal.pos.txt.gz	IPF	-0.0083	-0.018664	0.4247	0.4194	0.0018	0.018863	4.584e-06	0.3224	7367	953873	0.00287785	21.2566
531	rs4739402	T	C	T	C	M01110.metal.pos.txt.gz	IPF	-0.0085	0.0003526	0.5172	0.5467	0.0019	0.020084	5.614e-06	0.986	7367	903869	0.00270933	20.0084
532	rs4982495	T	C	T	C	M01110.metal.pos.txt.gz	IPF	-0.0084	0.0094598	0.4275	0.4654	0.0018	0.018847	3.272e-06	0.6157	7367	953873	0.00294741	21.7719
533	rs532098	A	G	A	G	M01110.metal.pos.txt.gz	IPF	0.009	-0.054309	0.461	0.4401	0.002	0.018932	6.795e-06	0.004122	5601	888793	0.0036024	20.2428
534	rs6568389	T	C	T	C	M01110.metal.pos.txt.gz	IPF	0.0157	-0.041831	0.8061	0.7157	0.0033	0.020567	2.164e-06	0.04196	7367	953873	0.00306301	22.6284
535	rs712916	T	C	T	C	M01110.metal.pos.txt.gz	IPF	-0.0456	-0.065757	0.9875	0.98555	0.0102	0.072351	8.193e-06	0.3634	7367	953873	0.00270559	19.9807
536	rs7169869	A	G	A	G	M01110.metal.pos.txt.gz	IPF	-0.0194	-0.02075	0.5404	0.4863	0.0043	0.019833	6.586e-06	0.2955	1766	937232	0.0113946	20.3317
537	rs9679675	A	C	A	C	M01110.metal.pos.txt.gz	IPF	0.0092	-0.0094908	0.4732	0.4999	0.0018	0.018758	4.167e-07	0.6129	7367	953873	0.00353348	26.1164
543	rs11159894	T	C	T	C	M01114.metal.pos.txt.gz	IPF	0.032	0.071385	0.3295	0.3334	0.0067	0.019821	1.769e-06	0.0003165	4934	953873	0.00460201	22.8021
544	rs12405017	T	C	T	C	M01114.metal.pos.txt.gz	IPF	-0.1891	-0.053458	0.9817	0.98519	0.0426	0.071784	9.175e-06	0.4564	1447	953873	0.0134345	19.6772
545	rs17131011	A	G	A	G	M01114.metal.pos.txt.gz	IPF	-0.0781	0.026846	0.0404	0.04883	0.0174	0.042456	6.882e-06	0.5272	4934	953873	0.00406663	20.1385
546	rs17175231	A	G	A	G	M01114.metal.pos.txt.gz	IPF	0.0593	0.092972	0.9348	0.94281	0.0125	0.040773	1.986e-06	0.0226	4934	953873	0.00454061	22.4964
547	rs17641342	C	G	C	G	M01114.metal.pos.txt.gz	IPF	0.0725	-0.05117	0.1639	0.1655	0.0159	0.025135	5.262e-06	0.04177	1447	953873	0.014165	20.7626
548	rs2002212	A	G	A	G	M01114.metal.pos.txt.gz	IPF	-0.0691	0.040859	0.049	0.06103	0.0155	0.042507	7.817e-06	0.3364	4934	903869	0.00401188	19.8663
549	rs2140798	T	C	T	C	M01114.metal.pos.txt.gz	IPF	-0.0519	-0.010113	0.0986	0.1192	0.0117	0.028623	8.8e-06	0.7238	4934	953873	0.00397224	19.6692
550	rs4244808	T	G	T	G	M01114.metal.pos.txt.gz	IPF	0.0305	-0.022239	0.5307	0.5043	0.0068	0.020197	8.3e-06	0.2708	4934	903869	0.00406084	20.1097
551	rs696155	A	G	A	G	M01114.metal.pos.txt.gz	IPF	-0.0412	0.0011914	0.1888	0.1866	0.0088	0.025801	2.921e-06	0.9632	4934	903869	0.00442288	21.9105
552	rs7427777	A	C	A	C	M01114.metal.pos.txt.gz	IPF	0.1291	-0.0202	0.0483	0.04784	0.0286	0.045951	6.361e-06	0.6602	1447	953873	0.0138861	20.3479
553	rs8192870	T	G	T	G	M01114.metal.pos.txt.gz	IPF	-0.0365	0.022266	0.3498	0.3644	0.0067	0.020757	3.985e-08	0.2834	4934	903869	0.00597905	29.6661
554	rs9851393	A	G	A	G	M01114.metal.pos.txt.gz	IPF	0.0297	0.023336	0.5199	0.5203	0.0066	0.018652	7.383e-06	0.2109	4934	953873	0.0040874	20.2418
560	rs11118120	A	C	A	C	M01121.metal.pos.txt.gz	IPF	-0.019	0.012718	0.8501	0.8404	0.004	0.025925	1.965e-06	0.6237	7349	953873	0.00306075	22.5564
561	rs11940037	T	C	T	C	M01121.metal.pos.txt.gz	IPF	0.019	0.00098674	0.842	0.8135	0.0041	0.024388	2.821e-06	0.9677	7349	953873	0.00291369	21.4695
562	rs1466228	T	C	T	C	M01121.metal.pos.txt.gz	IPF	-0.0361	-0.030328	0.0348	0.03599	0.0078	0.049169	3.206e-06	0.5373	7349	953873	0.00290625	21.4145
563	rs17351329	A	G	A	G	M01121.metal.pos.txt.gz	IPF	-0.0185	-0.0026122	0.8651	0.8583	0.0041	0.027093	5.372e-06	0.9232	7349	953873	0.00276278	20.3544
564	rs1822906	A	G	A	G	M01121.metal.pos.txt.gz	IPF	0.018	0.026957	0.2048	0.2047	0.0034	0.031966	9.608e-08	0.3991	7349	554996	0.00379932	28.0201
565	rs4470674	A	T	A	T	M01121.metal.pos.txt.gz	IPF	-0.0141	-0.018586	0.7182	0.6919	0.0031	0.020269	6.639e-06	0.3592	7349	953873	0.00280715	20.6822
566	rs603424	A	G	A	G	M01121.metal.pos.txt.gz	IPF	0.0292	0.026081	0.1865	0.1555	0.0038	0.026619	1.56e-14	0.3272	7349	903869	0.00797067	59.031
567	rs7583745	T	C	T	C	M01121.metal.pos.txt.gz	IPF	-0.0348	-0.025174	0.884	0.91157	0.0075	0.032305	3.062e-06	0.4358	1768	953873	0.0120309	21.5052
573	rs11616655	A	G	A	G	M01123.metal.pos.txt.gz	IPF	-0.1069	-0.046672	0.9444	0.93509	0.0237	0.037617	6.369e-06	0.2147	2639	953873	0.0076504	20.3296
574	rs17077586	A	G	A	G	M01123.metal.pos.txt.gz	IPF	0.1032	-0.051186	0.9187	0.93508	0.021	0.043526	9.198e-07	0.2396	2639	887228	0.00906828	24.1319
575	rs17741813	T	C	T	C	M01123.metal.pos.txt.gz	IPF	0.538	-0.010974	0.015	0.06171	0.1192	0.039348	6.389e-06	0.7803	908	953873	0.0219427	20.3261
576	rs2846723	T	G	T	G	M01123.metal.pos.txt.gz	IPF	-0.0476	-0.035851	0.5442	0.5229	0.0105	0.018723	5.755e-06	0.05552	2639	953873	0.00772729	20.5355
577	rs4384764	A	G	A	G	M01123.metal.pos.txt.gz	IPF	-0.0568	-0.02909	0.2371	0.2602	0.0127	0.021182	7.902e-06	0.1696	2639	953873	0.00752264	19.9876
578	rs494562	A	G	A	G	M01123.metal.pos.txt.gz	IPF	-0.1182	-0.026338	0.8988	0.90695	0.0167	0.031177	1.339e-12	0.3982	2639	953873	0.0186293	50.0579
579	rs7795118	T	C	T	C	M01123.metal.pos.txt.gz	IPF	0.0905	-0.034581	0.2305	0.2378	0.0186	0.025989	1.211e-06	0.1833	2639	887228	0.00889105	23.656
585	rs10024717	A	G	A	G	M01125.metal.pos.txt.gz	IPF	0.0085	0.031477	0.3772	0.3547	0.0016	0.02092	7.501e-08	0.1324	7352	903869	0.00382409	28.215
586	rs10063205	T	C	T	C	M01125.metal.pos.txt.gz	IPF	0.008	0.060369	0.1559	0.1997	0.0017	0.027912	4.058e-06	0.03055	7352	887228	0.0030031	22.1393
587	rs11128879	T	C	T	C	M01125.metal.pos.txt.gz	IPF	-0.0078	0.040517	0.1208	0.15	0.0018	0.026893	9.564e-06	0.1319	7352	953873	0.0025476	18.7727
588	rs12707434	A	G	A	G	M01125.metal.pos.txt.gz	IPF	-0.0366	-0.029237	0.9639	0.97376	0.008	0.06012	4.647e-06	0.6267	1764	953873	0.0117263	20.9069
589	rs161503	T	C	T	C	M01125.metal.pos.txt.gz	IPF	0.008	-0.039389	0.1176	0.1313	0.0018	0.028026	6.867e-06	0.1599	7352	953873	0.00267956	19.7477
590	rs1895999	A	G	A	G	M01125.metal.pos.txt.gz	IPF	-0.0151	0.0074169	0.1699	0.1684	0.0032	0.026446	3.434e-06	0.7791	1764	903869	0.0124654	22.2414
591	rs2397972	A	G	A	G	M01125.metal.pos.txt.gz	IPF	0.012	0.00046211	0.054	0.06742	0.0026	0.037637	4.045e-06	0.9902	7352	953873	0.00288904	21.296
592	rs2470439	A	G	A	G	M01125.metal.pos.txt.gz	IPF	0.0083	-0.071483	0.11	0.1103	0.0018	0.02961	5.687e-06	0.01577	7352	953873	0.00288371	21.2566
593	rs3760605	T	C	T	C	M01125.metal.pos.txt.gz	IPF	0.0079	-0.014536	0.8912	0.8706	0.0018	0.028682	9.799e-06	0.6123	7352	953873	0.00261317	19.2571
594	rs4086666	T	G	T	G	M01125.metal.pos.txt.gz	IPF	0.0083	-0.016848	0.8804	0.891	0.0018	0.029937	2.422e-06	0.5736	7352	953873	0.00288371	21.2566
595	rs4347830	A	G	A	G	M01125.metal.pos.txt.gz	IPF	0.01	-0.019535	0.337	0.367	0.002	0.022657	5.733e-07	0.3886	5588	887228	0.00445395	24.9911
596	rs503360	A	G	A	G	M01125.metal.pos.txt.gz	IPF	0.0081	-0.0051508	0.8799	0.8847	0.0018	0.031266	4.785e-06	0.8691	7352	755859	0.00274679	20.2445
597	rs6101153	A	G	A	G	M01125.metal.pos.txt.gz	IPF	-0.008	0.077295	0.8897	0.8922	0.0018	0.04841	8.264e-06	0.1103	7352	481279	0.00267956	19.7477
598	rs7340968	A	C	A	C	M01125.metal.pos.txt.gz	IPF	0.0333	0.025568	0.027	0.02904	0.0075	0.055312	9.053e-06	0.6439	1764	953873	0.011052	19.6912
599	rs7530270	A	C	A	C	M01125.metal.pos.txt.gz	IPF	-0.0085	0.0084249	0.2	0.2573	0.0018	0.022693	1.509e-06	0.7104	7352	903869	0.00302393	22.2933
605	rs10234936	A	G	A	G	M01284.metal.pos.txt.gz	IPF	0.028	-0.022146	0.035	0.04988	0.0061	0.04082	4.877e-06	0.5874	5687	953873	0.0036912	21.0622
606	rs1043011	T	G	T	G	M01284.metal.pos.txt.gz	IPF	0.0172	-0.018657	0.1722	0.1801	0.0034	0.023993	5.214e-07	0.4368	5687	953873	0.00447987	25.5827
607	rs10433674	T	C	T	C	M01284.metal.pos.txt.gz	IPF	0.0264	0.0057696	0.9584	0.9626	0.0054	0.050598	1.242e-06	0.9092	5687	903869	0.00418519	23.8928
608	rs10795360	C	G	C	G	M01284.metal.pos.txt.gz	IPF	0.0114	0.025783	0.6957	0.7238	0.0025	0.020812	3.761e-06	0.2154	5687	953873	0.00364302	20.7863
609	rs10798574	T	G	T	G	M01284.metal.pos.txt.gz	IPF	-0.0142	-0.010315	0.2212	0.3083	0.003	0.020123	2.029e-06	0.6082	5687	953873	0.00392413	22.3966
610	rs10993160	A	G	A	G	M01284.metal.pos.txt.gz	IPF	0.0295	0.0084407	0.9587	0.9671	0.0062	0.052656	1.676e-06	0.8726	5687	953873	0.00396508	22.6312
611	rs17092955	T	G	T	G	M01284.metal.pos.txt.gz	IPF	-0.0175	-0.040661	0.1024	0.1148	0.0034	0.029669	3.388e-07	0.1705	5687	953873	0.00463678	26.4829
612	rs17268257	T	C	T	C	M01284.metal.pos.txt.gz	IPF	-0.0159	-0.012835	0.1349	0.1631	0.0035	0.025605	7.314e-06	0.6162	5687	953873	0.00361578	20.6303
613	rs202490	T	C	T	C	M01284.metal.pos.txt.gz	IPF	-0.0111	0.010877	0.3533	0.3654	0.0024	0.02098	4.452e-06	0.6042	5687	903869	0.00374723	21.3831
614	rs3857856	A	G	A	G	M01284.metal.pos.txt.gz	IPF	0.0152	0.025644	0.8885	0.8912	0.0033	0.032088	4.933e-06	0.4242	5687	937232	0.00371671	21.2083
615	rs42041	C	G	C	G	M01284.metal.pos.txt.gz	IPF	-0.0109	-0.021088	0.7449	0.7536	0.0025	0.021522	9.332e-06	0.3272	5687	953873	0.00333151	19.0029
616	rs4516857	C	G	C	G	M01284.metal.pos.txt.gz	IPF	0.0205	-0.04004	0.0991	0.08181	0.0045	0.032962	4.927e-06	0.2245	5687	953873	0.00363595	20.7458
617	rs4822129	A	G	A	G	M01284.metal.pos.txt.gz	IPF	0.0122	-0.016131	0.194	0.1949	0.0026	0.023787	3.757e-06	0.4977	5687	953873	0.00385666	22.01
618	rs715	T	C	T	C	M01284.metal.pos.txt.gz	IPF	0.0113	-0.017156	0.7125	0.6888	0.0024	0.019995	4.187e-06	0.3909	5687	953873	0.00388295	22.1606
619	rs7220150	A	C	A	C	M01284.metal.pos.txt.gz	IPF	0.0147	-0.0078938	0.8227	0.8179	0.0033	0.02808	6.706e-06	0.7786	5687	887228	0.00347705	19.836
620	rs780093	T	C	T	C	M01284.metal.pos.txt.gz	IPF	-0.0108	0.0031737	0.3998	0.3766	0.0024	0.019175	3.982e-06	0.8685	5687	953873	0.00354812	20.2429
621	rs892051	T	C	T	C	M01284.metal.pos.txt.gz	IPF	0.011	0.048716	0.2576	0.2428	0.0025	0.021639	7.667e-06	0.02437	5687	953873	0.00339271	19.3532
622	rs9403794	A	C	A	C	M01284.metal.pos.txt.gz	IPF	0.0175	0.024694	0.5963	0.5844	0.0039	0.019013	8.093e-06	0.194	1679	953873	0.01185	20.1108
628	rs10033622	T	C	T	C	M01299.metal.pos.txt.gz	IPF	0.0126	0.022488	0.6115	0.6317	0.0026	0.019465	1.346e-06	0.248	1761	953873	0.0131608	23.4585
629	rs10516469	T	C	T	C	M01299.metal.pos.txt.gz	IPF	-0.0114	-0.0047824	0.1	0.1308	0.0025	0.030941	5.886e-06	0.8772	7358	903869	0.00281802	20.7879
630	rs10873157	T	C	T	C	M01299.metal.pos.txt.gz	IPF	-0.0109	0.029667	0.0933	0.0908	0.0024	0.034184	8.624e-06	0.3855	7358	903869	0.00279547	20.6211
631	rs11243929	T	C	T	C	M01299.metal.pos.txt.gz	IPF	-0.0076	-0.016113	0.7731	0.7911	0.0017	0.024848	8.328e-06	0.5167	7358	903869	0.00270889	19.9807
632	rs12728678	T	C	T	C	M01299.metal.pos.txt.gz	IPF	-0.0096	-0.00019438	0.2003	0.2184	0.0017	0.024402	2.189e-08	0.9936	7358	903869	0.00431526	31.8806
633	rs13237436	A	G	A	G	M01299.metal.pos.txt.gz	IPF	-0.0076	0.061175	0.193	0.1977	0.0017	0.024772	7.257e-06	0.01353	7358	937232	0.00270889	19.9807
634	rs1475943	T	C	T	C	M01299.metal.pos.txt.gz	IPF	0.0079	0.018601	0.2215	0.2587	0.0017	0.023112	3.693e-06	0.4209	7358	903869	0.00292633	21.5893
635	rs1532775	A	G	A	G	M01299.metal.pos.txt.gz	IPF	0.0081	0.011513	0.7796	0.7915	0.0017	0.024334	1.035e-06	0.6361	7358	903869	0.00307592	22.6963
636	rs17293820	T	G	T	G	M01299.metal.pos.txt.gz	IPF	0.0081	-0.0083433	0.8016	0.8067	0.0017	0.023432	2.011e-06	0.7218	7358	953873	0.00307592	22.6963
637	rs1851740	A	C	A	C	M01299.metal.pos.txt.gz	IPF	-0.008	0.003635	0.185	0.1875	0.0017	0.025837	2.742e-06	0.8881	7358	903869	0.00300066	22.1393
638	rs2891733	T	C	T	C	M01299.metal.pos.txt.gz	IPF	-0.0109	0.014552	0.8941	0.9111	0.0024	0.033713	8.467e-06	0.666	7358	903869	0.00279547	20.6211
639	rs4347830	A	G	A	G	M01299.metal.pos.txt.gz	IPF	0.009	-0.019535	0.337	0.367	0.002	0.022657	6.795e-06	0.3886	5597	887228	0.00360497	20.2428
640	rs4808739	T	C	T	C	M01299.metal.pos.txt.gz	IPF	0.0083	0.030721	0.7578	0.7502	0.0018	0.021982	2.421e-06	0.1622	7358	953873	0.00288136	21.2566
641	rs6493	A	G	A	G	M01299.metal.pos.txt.gz	IPF	0.0114	0.013696	0.1195	0.1693	0.0024	0.02489	2.346e-06	0.5821	7358	953873	0.00305702	22.5564
642	rs703014	A	G	A	G	M01299.metal.pos.txt.gz	IPF	0.0135	-0.0013606	0.326	0.3257	0.0027	0.019845	7.194e-07	0.9453	1761	953873	0.0139978	24.9716
643	rs7151615	T	G	T	G	M01299.metal.pos.txt.gz	IPF	-0.0079	0.039266	0.273	0.2987	0.0016	0.020583	1.469e-06	0.05643	7358	953873	0.00330231	24.3723
644	rs7195332	T	C	T	C	M01299.metal.pos.txt.gz	IPF	0.0077	-0.033689	0.2152	0.2066	0.0017	0.024417	4.051e-06	0.1677	7358	903869	0.00278045	20.51
645	rs7641634	A	G	A	G	M01299.metal.pos.txt.gz	IPF	-0.0077	-0.037221	0.266	0.2778	0.0016	0.020803	2.564e-06	0.07358	7358	953873	0.00313774	23.1539
646	rs8111703	A	T	A	T	M01299.metal.pos.txt.gz	IPF	-0.0084	0.0031309	0.2142	0.2376	0.0017	0.021788	1.467e-06	0.8857	7358	953873	0.00330721	24.4086
647	rs906466	A	G	A	G	M01299.metal.pos.txt.gz	IPF	0.0076	-0.014619	0.1846	0.2023	0.0017	0.025196	8.838e-06	0.5618	7358	903869	0.00270889	19.9807
648	rs9327433	T	G	T	G	M01299.metal.pos.txt.gz	IPF	-0.0076	-0.015209	0.5134	0.5257	0.0016	0.020112	2.529e-06	0.4495	7358	903869	0.00305702	22.5564
649	rs936632	A	C	A	C	M01299.metal.pos.txt.gz	IPF	-0.0089	0.00063112	0.1787	0.1755	0.0017	0.02468	2.694e-07	0.9796	7358	953873	0.00371114	27.4009
650	rs9400467	T	C	T	C	M01299.metal.pos.txt.gz	IPF	-0.0121	0.023196	0.7059	0.6835	0.0016	0.020216	6.541e-14	0.2512	7358	953873	0.00771273	57.1759
651	rs9594421	A	T	A	T	M01299.metal.pos.txt.gz	IPF	0.0075	-0.023644	0.2757	0.2894	0.0016	0.022253	4.594e-06	0.288	7358	903869	0.00297734	21.9667
657	rs10095414	A	G	A	G	M01301.metal.pos.txt.gz	IPF	0.0086	-0.0066553	0.8619	0.8596	0.0018	0.02692	2.285e-06	0.8047	7363	953873	0.00309067	22.821
658	rs10850904	T	C	T	C	M01301.metal.pos.txt.gz	IPF	0.0085	-0.0010987	0.127	0.1291	0.0018	0.030035	2.738e-06	0.9708	7363	937232	0.00301943	22.2933
659	rs10917910	A	C	A	C	M01301.metal.pos.txt.gz	IPF	-0.0086	-0.032434	0.8597	0.8856	0.0018	0.030707	1.652e-06	0.2909	7363	903869	0.00309067	22.821
660	rs11151130	A	G	A	G	M01301.metal.pos.txt.gz	IPF	0.0085	0.039426	0.1379	0.1296	0.0018	0.027001	1.786e-06	0.1442	7363	953873	0.00301943	22.2933
661	rs11659807	C	G	C	G	M01301.metal.pos.txt.gz	IPF	-0.0082	-0.03017	0.1964	0.2288	0.0017	0.024022	2.155e-06	0.2092	7363	903869	0.00314996	23.2601
662	rs1179979	A	G	A	G	M01301.metal.pos.txt.gz	IPF	-0.0128	-0.0082897	0.9214	0.9262	0.0026	0.037588	9.489e-07	0.8254	7363	937232	0.00328089	24.2301
663	rs12268257	T	C	T	C	M01301.metal.pos.txt.gz	IPF	-0.0082	-0.042438	0.1339	0.1289	0.0018	0.027703	5.591e-06	0.1255	7363	953873	0.00281064	20.7474
664	rs13302218	A	G	A	G	M01301.metal.pos.txt.gz	IPF	-0.0118	0.022402	0.932	0.94444	0.0026	0.03959	6.799e-06	0.5715	7363	953873	0.00278965	20.592
665	rs1402325	A	G	A	G	M01301.metal.pos.txt.gz	IPF	-0.008	-0.030828	0.1437	0.1548	0.0018	0.025909	8.23e-06	0.2341	7363	953873	0.00267557	19.7477
666	rs1573544	T	C	T	C	M01301.metal.pos.txt.gz	IPF	0.0087	0.0080267	0.1484	0.1688	0.0018	0.025147	9.635e-07	0.7496	7363	953873	0.00316274	23.3548
667	rs2863979	A	G	A	G	M01301.metal.pos.txt.gz	IPF	0.0143	0.011066	0.7241	0.7197	0.0017	0.020666	1.443e-17	0.5923	7363	953873	0.00951844	70.7386
668	rs3024536	T	C	T	C	M01301.metal.pos.txt.gz	IPF	-0.0085	0.004658	0.1443	0.1309	0.0018	0.027151	1.69e-06	0.8638	7363	953873	0.00301943	22.2933
669	rs4317453	A	G	A	G	M01301.metal.pos.txt.gz	IPF	-0.0077	-0.030479	0.3363	0.3747	0.0017	0.023345	9.116e-06	0.1917	7363	887228	0.00277856	20.51
670	rs4426541	A	G	A	G	M01301.metal.pos.txt.gz	IPF	-0.0079	0.0041951	0.2229	0.215	0.0017	0.022578	5.395e-06	0.8526	7363	953873	0.00292435	21.5893
671	rs7572149	T	C	T	C	M01301.metal.pos.txt.gz	IPF	0.0088	-0.0002138	0.133	0.1588	0.0018	0.02664	1.002e-06	0.9936	7363	953873	0.00323562	23.8947
672	rs7583413	T	C	T	C	M01301.metal.pos.txt.gz	IPF	0.0082	-0.0011495	0.8245	0.8214	0.0017	0.024198	2.62e-06	0.9621	7363	953873	0.00314996	23.2601
673	rs9642758	A	G	A	G	M01301.metal.pos.txt.gz	IPF	0.0086	0.046768	0.1578	0.1519	0.0018	0.030649	1.282e-06	0.127	7363	887228	0.00309067	22.821
679	rs10066453	C	G	C	G	M01302.metal.pos.txt.gz	IPF	0.0165	0.068074	0.0387	0.04059	0.0035	0.050488	1.928e-06	0.1776	7347	953873	0.00301585	22.2184
680	rs11232103	A	C	A	C	M01302.metal.pos.txt.gz	IPF	0.0085	-0.029082	0.1151	0.1369	0.0017	0.030308	3.697e-07	0.3373	7347	903869	0.00339121	24.9932
681	rs11760350	A	G	A	G	M01302.metal.pos.txt.gz	IPF	-0.0075	0.022757	0.1238	0.1249	0.0017	0.027985	7.77e-06	0.4161	7347	953873	0.0026422	19.4584
682	rs16839317	T	C	T	C	M01302.metal.pos.txt.gz	IPF	-0.0078	0.021873	0.8726	0.8611	0.0017	0.027011	2.753e-06	0.4181	7347	953873	0.00285719	21.0462
683	rs1742639	A	G	A	G	M01302.metal.pos.txt.gz	IPF	0.0077	-0.009899	0.8865	0.8948	0.0017	0.029881	7.939e-06	0.7404	7347	953873	0.0027846	20.51
684	rs17478241	T	C	T	C	M01302.metal.pos.txt.gz	IPF	-0.0076	0.01816	0.168	0.2062	0.0016	0.025432	2.751e-06	0.4752	7347	903869	0.00306158	22.5564
685	rs2418886	A	G	A	G	M01302.metal.pos.txt.gz	IPF	0.0223	-0.0065872	0.0489	0.04818	0.0047	0.042219	1.63e-06	0.876	1762	953873	0.0126152	22.4864
686	rs2780242	T	C	T	C	M01302.metal.pos.txt.gz	IPF	-0.0083	-0.054559	0.1138	0.1155	0.0018	0.029027	3.849e-06	0.06016	7347	953873	0.00288567	21.2566
687	rs320485	T	C	T	C	M01302.metal.pos.txt.gz	IPF	0.0094	0.030722	0.1324	0.152	0.0017	0.030276	4.97e-08	0.3102	7347	887228	0.00414423	30.5661
688	rs3740996	A	G	A	G	M01302.metal.pos.txt.gz	IPF	0.0078	0.019342	0.1208	0.1216	0.0017	0.028613	4.33e-06	0.499	7347	953873	0.00285719	21.0462
689	rs4693555	T	C	T	C	M01302.metal.pos.txt.gz	IPF	-0.0069	0.010147	0.2131	0.2532	0.0016	0.023131	8.434e-06	0.6609	7347	937232	0.00252494	18.5926
690	rs487946	T	G	T	G	M01302.metal.pos.txt.gz	IPF	-0.0074	0.024741	0.8292	0.8231	0.0016	0.025982	3.096e-06	0.341	7347	903869	0.00290303	21.3848
691	rs6071991	T	C	T	C	M01302.metal.pos.txt.gz	IPF	-0.0075	-0.040051	0.1495	0.1687	0.0016	0.027013	3.811e-06	0.1382	7347	937232	0.00298178	21.9667
692	rs6533609	T	C	T	C	M01302.metal.pos.txt.gz	IPF	-0.0077	-0.020308	0.1429	0.1474	0.0017	0.028771	3.776e-06	0.4803	7347	903869	0.0027846	20.51
693	rs6766715	A	G	A	G	M01302.metal.pos.txt.gz	IPF	-0.009	-0.023137	0.128	0.1316	0.002	0.027461	6.795e-06	0.3995	5585	953873	0.00361268	20.2427
694	rs7570141	A	G	A	G	M01302.metal.pos.txt.gz	IPF	-0.0119	-0.038995	0.104	0.1283	0.0026	0.033304	6.212e-06	0.2417	7347	887228	0.00284316	20.9425
695	rs9410970	A	C	A	C	M01302.metal.pos.txt.gz	IPF	-0.0068	-0.013547	0.2201	0.2155	0.0015	0.02434	5.493e-06	0.5778	7347	903869	0.00278941	20.5455
696	rs9598459	A	G	A	G	M01302.metal.pos.txt.gz	IPF	0.0079	0.0013395	0.896	0.90103	0.0017	0.03132	5.172e-06	0.9659	7347	953873	0.0029307	21.5893
702	rs10899384	A	G	A	G	M01303.metal.pos.txt.gz	IPF	0.0139	-0.022834	0.3819	0.3733	0.0026	0.020781	1.27e-07	0.2719	6946	903869	0.00409793	28.5731
703	rs12713120	T	C	T	C	M01303.metal.pos.txt.gz	IPF	0.0122	-0.013484	0.7564	0.7671	0.0027	0.023632	6.742e-06	0.5683	6946	903869	0.00293078	20.4111
704	rs2026395	A	T	A	T	M01303.metal.pos.txt.gz	IPF	-0.0116	0.0264	0.6013	0.6095	0.0026	0.019144	9.821e-06	0.1679	6946	953873	0.00285754	19.8996
705	rs2288867	T	C	T	C	M01303.metal.pos.txt.gz	IPF	-0.0132	0.0032736	0.2334	0.2289	0.0027	0.023615	1.018e-06	0.8897	6946	903869	0.00342921	23.8944
706	rs26724	A	G	A	G	M01303.metal.pos.txt.gz	IPF	0.014	-0.039274	0.3507	0.3566	0.0026	0.019478	1.258e-07	0.04376	6946	953873	0.00415686	28.9857
707	rs2869990	T	C	T	C	M01303.metal.pos.txt.gz	IPF	-0.0125	0.009529	0.7192	0.7304	0.0027	0.021019	2.831e-06	0.6503	6946	953873	0.00307624	21.4273
708	rs690191	T	C	T	C	M01303.metal.pos.txt.gz	IPF	-0.0121	-0.032152	0.7821	0.7805	0.0027	0.026989	9.234e-06	0.2335	6946	887228	0.00288307	20.0779
709	rs7010256	C	G	C	G	M01303.metal.pos.txt.gz	IPF	0.1003	-0.0039444	0.0158	0.0116	0.0224	0.080557	7.575e-06	0.9609	1578	953873	0.0125463	20.0242
710	rs912170	A	G	A	G	M01303.metal.pos.txt.gz	IPF	-0.0186	0.015	0.8773	0.8604	0.0036	0.027088	2.089e-07	0.5798	6946	953873	0.00382843	26.6868
711	rs9471841	T	C	T	C	M01303.metal.pos.txt.gz	IPF	-0.0275	0.024687	0.0526	0.06576	0.0062	0.045646	9.844e-06	0.5886	6946	887228	0.00282435	19.6679
717	rs11118120	A	C	A	C	M01336.metal.pos.txt.gz	IPF	-0.0137	0.012718	0.8495	0.8404	0.0029	0.025925	3.158e-06	0.6237	7352	953873	0.00302638	22.3114
718	rs11133892	A	G	A	G	M01336.metal.pos.txt.gz	IPF	0.0089	0.0049065	0.4427	0.437	0.0017	0.018938	1.559e-07	0.7956	7352	953873	0.00371416	27.4008
719	rs11193635	T	C	T	C	M01336.metal.pos.txt.gz	IPF	0.0087	-0.022053	0.6724	0.6885	0.0018	0.021668	7.342e-07	0.3088	7352	903869	0.00316745	23.3548
720	rs12147529	A	G	A	G	M01336.metal.pos.txt.gz	IPF	0.0078	-0.0031389	0.4485	0.4745	0.0017	0.018894	5.917e-06	0.8681	7352	953873	0.00285525	21.0462
721	rs12200468	A	G	A	G	M01336.metal.pos.txt.gz	IPF	0.0111	-0.049408	0.8245	0.8255	0.0025	0.024568	6.851e-06	0.04432	7352	953873	0.00267422	19.7082
722	rs12353451	A	G	A	G	M01336.metal.pos.txt.gz	IPF	-0.0229	0.013069	0.0373	0.03885	0.0049	0.048169	3.123e-06	0.7861	7352	953873	0.002962	21.8354
723	rs1348656	T	C	T	C	M01336.metal.pos.txt.gz	IPF	-0.0117	-0.0084403	0.798	0.8065	0.0024	0.023593	9.069e-07	0.7205	7352	953873	0.00322212	23.7592
724	rs1466228	T	C	T	C	M01336.metal.pos.txt.gz	IPF	-0.0234	-0.030328	0.035	0.03599	0.0051	0.049169	4.185e-06	0.5373	7352	953873	0.00285525	21.0462
725	rs2190223	A	G	A	G	M01336.metal.pos.txt.gz	IPF	0.0076	0.027365	0.5733	0.6021	0.0017	0.020489	7.691e-06	0.1817	7352	903869	0.0027111	19.9807
726	rs2931383	T	G	T	G	M01336.metal.pos.txt.gz	IPF	0.0078	0.0080542	0.5816	0.5922	0.0017	0.019014	4.678e-06	0.6719	7352	953873	0.00285525	21.0462
727	rs4408	A	G	A	G	M01336.metal.pos.txt.gz	IPF	0.0107	0.034601	0.1844	0.2222	0.0024	0.024945	9.964e-06	0.1654	7352	903869	0.00269629	19.8713
728	rs4420815	A	G	A	G	M01336.metal.pos.txt.gz	IPF	-0.015	0.0046859	0.143	0.1596	0.003	0.025658	5.733e-07	0.8551	5586	953873	0.00445553	24.991
729	rs4470674	A	T	A	T	M01336.metal.pos.txt.gz	IPF	-0.0106	-0.018586	0.7184	0.6919	0.0022	0.020269	2.019e-06	0.3592	7352	953873	0.00314769	23.2086
730	rs4957697	A	G	A	G	M01336.metal.pos.txt.gz	IPF	-0.0081	-0.027888	0.4208	0.4312	0.0017	0.020205	1.733e-06	0.1675	7352	903869	0.00307842	22.6962
731	rs603424	A	G	A	G	M01336.metal.pos.txt.gz	IPF	0.0151	0.026081	0.1836	0.1555	0.0024	0.026619	2.455e-10	0.3272	7352	903869	0.00535542	39.5743
732	rs7565567	A	C	A	C	M01336.metal.pos.txt.gz	IPF	-0.042	-0.0057165	0.982	0.96412	0.009	0.056873	3.061e-06	0.9199	5586	903869	0.0038835	21.77
733	rs9809122	A	G	A	G	M01336.metal.pos.txt.gz	IPF	-0.008	0.019719	0.5296	0.5504	0.0017	0.018843	2.445e-06	0.2953	7352	953873	0.0030031	22.1393
739	rs10021069	T	C	T	C	M01356.metal.pos.txt.gz	IPF	0.031	0.032295	0.9664	0.96661	0.0067	0.050989	4.065e-06	0.5265	7335	953873	0.0029101	21.402
740	rs10156335	A	G	A	G	M01356.metal.pos.txt.gz	IPF	-0.0153	-0.0065382	0.8473	0.8405	0.0034	0.025293	7.174e-06	0.796	7335	953873	0.00275314	20.2445
741	rs11118895	T	C	T	C	M01356.metal.pos.txt.gz	IPF	0.0202	-0.020721	0.4675	0.3997	0.0045	0.018983	7.155e-06	0.275	1755	953873	0.0113512	20.1272
742	rs11674467	T	C	T	C	M01356.metal.pos.txt.gz	IPF	0.0148	0.016496	0.4181	0.4318	0.003	0.020446	7.005e-07	0.4198	7335	903869	0.00330706	24.3311
743	rs11824733	T	C	T	C	M01356.metal.pos.txt.gz	IPF	0.072	-0.010871	0.0212	0.023	0.0161	0.061654	7.644e-06	0.86	1755	953873	0.0112672	19.9764
744	rs1483739	A	C	A	C	M01356.metal.pos.txt.gz	IPF	0.0117	-0.00048695	0.2369	0.2587	0.0026	0.02347	9.507e-06	0.9834	7335	903869	0.00275314	20.2445
745	rs17066836	C	G	C	G	M01356.metal.pos.txt.gz	IPF	-0.0707	-0.11737	0.0202	0.01553	0.0157	0.070208	6.243e-06	0.09457	1755	953873	0.0114228	20.2556
746	rs17511568	T	C	T	C	M01356.metal.pos.txt.gz	IPF	0.0152	-0.011379	0.8423	0.8207	0.0033	0.027048	5.26e-06	0.674	7335	903869	0.00288406	21.21
747	rs1801838	T	C	T	C	M01356.metal.pos.txt.gz	IPF	-0.0469	-0.053159	0.9655	0.8882	0.0105	0.037935	8.513e-06	0.1611	7335	673184	0.00271261	19.9457
748	rs4472784	T	C	T	C	M01356.metal.pos.txt.gz	IPF	-0.0118	0.019702	0.3048	0.3322	0.0026	0.021437	4.782e-06	0.358	7335	903869	0.00280027	20.592
749	rs603424	A	G	A	G	M01356.metal.pos.txt.gz	IPF	0.0182	0.026081	0.1833	0.1555	0.0032	0.026619	2.229e-08	0.3272	7335	903869	0.00439068	32.3388
750	rs7322343	A	C	A	C	M01356.metal.pos.txt.gz	IPF	-0.0523	-0.038895	0.0391	0.0773	0.0115	0.03974	5.206e-06	0.3277	1755	887228	0.0116478	20.6592
751	rs9291034	T	C	T	C	M01356.metal.pos.txt.gz	IPF	-0.0117	0.012329	0.4068	0.4419	0.0026	0.020383	5.416e-06	0.5453	7335	903869	0.00275314	20.2445
757	rs10021069	T	C	T	C	M01358.metal.pos.txt.gz	IPF	0.0238	0.032295	0.9663	0.96661	0.005	0.050989	1.81e-06	0.5265	7355	953873	0.00307111	22.6514
758	rs10152773	T	C	T	C	M01358.metal.pos.txt.gz	IPF	-0.0224	-0.024543	0.0425	0.04181	0.0049	0.044736	4.733e-06	0.5833	7355	953873	0.00283328	20.8923
759	rs10160169	A	G	A	G	M01358.metal.pos.txt.gz	IPF	0.0084	0.037416	0.6329	0.6132	0.0018	0.019201	3.777e-06	0.05133	7355	953873	0.00295221	21.7719
760	rs1075227	T	C	T	C	M01358.metal.pos.txt.gz	IPF	0.009	-0.01607	0.552	0.5173	0.002	0.018823	6.795e-06	0.3932	5590	953873	0.00360946	20.2428
761	rs10853932	T	C	T	C	M01358.metal.pos.txt.gz	IPF	0.008	-0.0040169	0.345	0.3418	0.0018	0.021051	5.449e-06	0.8487	7355	903869	0.00267847	19.7477
762	rs11118120	A	C	A	C	M01358.metal.pos.txt.gz	IPF	-0.0121	0.012718	0.8531	0.8404	0.0025	0.025925	1.176e-06	0.6237	7355	953873	0.00317488	23.4192
763	rs11940037	T	C	T	C	M01358.metal.pos.txt.gz	IPF	0.0125	0.00098674	0.8408	0.8135	0.0025	0.024388	7.006e-07	0.9677	7355	953873	0.00338753	24.9932
764	rs12353451	A	G	A	G	M01358.metal.pos.txt.gz	IPF	-0.0223	0.013069	0.0373	0.03885	0.0049	0.048169	6.061e-06	0.7861	7355	953873	0.00280811	20.7062
765	rs1237044	T	C	T	C	M01358.metal.pos.txt.gz	IPF	0.0081	-0.01025	0.5836	0.5689	0.0018	0.020524	5.097e-06	0.6175	7355	903869	0.00274567	20.2445
766	rs1348656	T	C	T	C	M01358.metal.pos.txt.gz	IPF	-0.0137	-0.0084403	0.798	0.8065	0.0024	0.023593	1.169e-08	0.7205	7355	953873	0.00441079	32.5762
767	rs1426441	A	G	A	G	M01358.metal.pos.txt.gz	IPF	0.0113	-0.01949	0.1423	0.1819	0.0025	0.024976	4.871e-06	0.4352	7355	953873	0.00277006	20.4248
768	rs1477025	T	C	T	C	M01358.metal.pos.txt.gz	IPF	0.0087	0.002303	0.6547	0.64	0.0017	0.020846	4.828e-07	0.912	7355	903869	0.00354825	26.1832
769	rs1662999	T	C	T	C	M01358.metal.pos.txt.gz	IPF	0.0079	0.013364	0.6325	0.6041	0.0017	0.019217	4.209e-06	0.4868	7355	953873	0.00292752	21.5893
770	rs2115366	T	C	T	C	M01358.metal.pos.txt.gz	IPF	-0.0079	0.052472	0.4418	0.4064	0.0017	0.019098	3.927e-06	0.006006	7355	953873	0.00292752	21.5893
771	rs216283	A	C	A	C	M01358.metal.pos.txt.gz	IPF	0.008	-0.014478	0.4171	0.4302	0.0017	0.022151	2.631e-06	0.5134	7355	887228	0.00300188	22.1393
772	rs2489020	T	C	T	C	M01358.metal.pos.txt.gz	IPF	-0.0081	0.01926	0.5262	0.5022	0.0017	0.020033	2.3e-06	0.3364	7355	903869	0.00307717	22.6962
773	rs3087751	A	C	A	C	M01358.metal.pos.txt.gz	IPF	0.0078	-0.017048	0.423	0.4091	0.0017	0.020553	5.234e-06	0.4068	7355	903869	0.00285409	21.0462
774	rs3748771	T	G	T	G	M01358.metal.pos.txt.gz	IPF	-0.0671	-0.036681	0.9877	0.991465	0.0149	0.101	6.346e-06	0.7165	1765	953873	0.0113597	20.2572
775	rs3863373	A	C	A	C	M01358.metal.pos.txt.gz	IPF	-0.008	0.028671	0.3335	0.3336	0.0017	0.019655	4.205e-06	0.1446	7355	953873	0.00300188	22.1393
776	rs4420815	A	G	A	G	M01358.metal.pos.txt.gz	IPF	-0.014	0.0046859	0.143	0.1596	0.003	0.025658	3.061e-06	0.8551	5590	953873	0.00388073	21.77
777	rs4507103	A	G	A	G	M01358.metal.pos.txt.gz	IPF	0.0077	-0.0017728	0.397	0.3997	0.0017	0.01906	6.893e-06	0.9259	7355	953873	0.00278158	20.51
778	rs4710948	A	G	A	G	M01358.metal.pos.txt.gz	IPF	-0.0085	-0.016428	0.3382	0.3608	0.0017	0.019441	6.939e-07	0.3981	7355	953873	0.00338753	24.9932
779	rs4750059	C	G	C	G	M01358.metal.pos.txt.gz	IPF	-0.0134	0.012545	0.7956	0.735	0.003	0.022943	6.492e-06	0.5845	7355	937232	0.00270525	19.9457
780	rs603424	A	G	A	G	M01358.metal.pos.txt.gz	IPF	0.0225	0.026081	0.1835	0.1555	0.0024	0.026619	6.064e-21	0.3272	7355	903869	0.0118087	87.8667
781	rs6453594	A	G	A	G	M01358.metal.pos.txt.gz	IPF	-0.0108	0.039083	0.2196	0.2241	0.0024	0.023874	7.008e-06	0.1016	7355	903869	0.00274567	20.2445
782	rs6733405	A	G	A	G	M01358.metal.pos.txt.gz	IPF	-0.0082	0.0065119	0.3867	0.3953	0.0017	0.019104	2.415e-06	0.7332	7355	953873	0.00315337	23.2601
783	rs6883481	T	C	T	C	M01358.metal.pos.txt.gz	IPF	0.0077	-0.0052423	0.4737	0.5078	0.0017	0.020195	6.17e-06	0.7952	7355	903869	0.00278158	20.51
784	rs727892	A	G	A	G	M01358.metal.pos.txt.gz	IPF	0.0083	-0.00013951	0.5021	0.5209	0.0017	0.020129	8.15e-07	0.9945	7355	903869	0.0032305	23.8309
785	rs7583745	T	C	T	C	M01358.metal.pos.txt.gz	IPF	-0.0262	-0.025174	0.8839	0.91157	0.0055	0.032305	1.487e-06	0.4358	1765	953873	0.0126936	22.6665
786	rs7681360	A	G	A	G	M01358.metal.pos.txt.gz	IPF	0.0078	-0.023469	0.5825	0.565	0.0017	0.018849	4.186e-06	0.2131	7355	953873	0.00285409	21.0462
787	rs7996008	A	G	A	G	M01358.metal.pos.txt.gz	IPF	0.0079	-0.026428	0.2935	0.3135	0.0017	0.020358	5.685e-06	0.1942	7355	953873	0.00292752	21.5893
788	rs954820	A	G	A	G	M01358.metal.pos.txt.gz	IPF	0.0083	-0.037837	0.5619	0.5607	0.0018	0.020837	2.57e-06	0.06939	7355	769651	0.00288254	21.2566
789	rs9568232	T	C	T	C	M01358.metal.pos.txt.gz	IPF	0.0126	0.030257	0.1152	0.07547	0.0028	0.036477	5.056e-06	0.4068	7355	953873	0.00274567	20.2445
790	rs9809122	A	G	A	G	M01358.metal.pos.txt.gz	IPF	-0.0087	0.019719	0.5295	0.5504	0.0017	0.018843	3.924e-07	0.2953	7355	953873	0.00354825	26.1832
796	rs10746614	A	G	A	G	M01359.metal.pos.txt.gz	IPF	-0.0114	0.019813	0.2333	0.2383	0.0025	0.02187	4.049e-06	0.3649	7323	953873	0.00283145	20.7879
797	rs11118120	A	C	A	C	M01359.metal.pos.txt.gz	IPF	-0.0142	0.012718	0.8514	0.8404	0.0031	0.025925	6.009e-06	0.6237	7323	953873	0.00285708	20.9766
798	rs11133892	A	G	A	G	M01359.metal.pos.txt.gz	IPF	0.012	0.0049065	0.4423	0.437	0.0023	0.018938	2.648e-07	0.7956	7323	953873	0.00370345	27.2137
799	rs13019537	C	G	C	G	M01359.metal.pos.txt.gz	IPF	0.0157	0.07005	0.841	0.8535	0.0032	0.026377	7.521e-07	0.007915	7323	953873	0.00327631	24.0647
800	rs1348656	T	C	T	C	M01359.metal.pos.txt.gz	IPF	-0.0172	-0.0084403	0.7976	0.8065	0.003	0.023593	1.058e-08	0.7205	7323	953873	0.00446869	32.8621
801	rs17495226	A	G	A	G	M01359.metal.pos.txt.gz	IPF	0.0216	0.041567	0.0566	0.0506	0.0047	0.042186	5.667e-06	0.3245	7323	953873	0.00287589	21.1151
802	rs1922578	A	G	A	G	M01359.metal.pos.txt.gz	IPF	-0.0391	-0.023198	0.9821	0.98034	0.0088	0.067005	9.363e-06	0.7292	7323	953873	0.00268862	19.7365
803	rs2017823	A	G	A	G	M01359.metal.pos.txt.gz	IPF	0.0142	-0.04619	0.841	0.8366	0.0031	0.025121	4.849e-06	0.06595	7323	953873	0.00285708	20.9766
804	rs35350	A	G	A	G	M01359.metal.pos.txt.gz	IPF	0.0376	0.034269	0.9692	0.9742	0.0083	0.071227	5.443e-06	0.6304	7323	887228	0.00279457	20.5164
805	rs4287543	A	G	A	G	M01359.metal.pos.txt.gz	IPF	0.015	-0.0041766	0.8771	0.8754	0.0033	0.029963	4.542e-06	0.8891	7323	903869	0.00281347	20.6555
806	rs4353846	T	C	T	C	M01359.metal.pos.txt.gz	IPF	-0.0112	-0.0026866	0.5643	0.5253	0.0023	0.020168	1.7e-06	0.894	7323	903869	0.00322766	23.7062
807	rs4573205	T	G	T	G	M01359.metal.pos.txt.gz	IPF	-0.0146	-0.040536	0.8698	0.8771	0.0033	0.028466	8.717e-06	0.1544	7323	953873	0.00266581	19.5686
808	rs4654501	A	G	A	G	M01359.metal.pos.txt.gz	IPF	0.011	0.034933	0.7667	0.7847	0.0025	0.024093	7.407e-06	0.1471	7323	903869	0.00263675	19.3547
809	rs6453591	A	T	A	T	M01359.metal.pos.txt.gz	IPF	0.0133	-0.039088	0.771	0.7759	0.0025	0.023874	8.55e-08	0.1016	7323	903869	0.00384998	28.2947
810	rs7898173	A	G	A	G	M01359.metal.pos.txt.gz	IPF	-0.0138	0.055752	0.1431	0.1552	0.0031	0.026575	8.957e-06	0.03591	7323	953873	0.00269881	19.8114
816	rs11036893	T	C	T	C	M01361.metal.pos.txt.gz	IPF	-0.013	-0.027137	0.3592	0.3458	0.0025	0.019574	3.005e-07	0.1656	7063	953873	0.0038138	27.0323
817	rs11245200	T	C	T	C	M01361.metal.pos.txt.gz	IPF	0.018	-0.0042539	0.1119	0.113	0.004	0.03013	8.941e-06	0.8877	7063	953873	0.00285886	20.2443
818	rs11791164	T	G	T	G	M01361.metal.pos.txt.gz	IPF	0.0196	-0.055602	0.0803	0.09756	0.0043	0.031751	4.345e-06	0.07991	7063	953873	0.00293299	20.7708
819	rs16830012	T	G	T	G	M01361.metal.pos.txt.gz	IPF	-0.0328	-0.054653	0.9719	0.95417	0.0073	0.047971	7.407e-06	0.2546	7063	953873	0.00285019	20.1827
820	rs17056226	T	G	T	G	M01361.metal.pos.txt.gz	IPF	0.0153	-0.0062081	0.1416	0.1247	0.0034	0.029877	7.065e-06	0.8354	7063	903869	0.00285886	20.2443
821	rs17385848	A	G	A	G	M01361.metal.pos.txt.gz	IPF	0.0122	-0.010306	0.6443	0.6767	0.0025	0.019868	1.162e-06	0.6039	7063	953873	0.00336038	23.8077
822	rs1830241	A	G	A	G	M01361.metal.pos.txt.gz	IPF	0.0118	0.010793	0.3431	0.4102	0.0026	0.023443	7.497e-06	0.6452	7063	571637	0.00290779	20.5918
823	rs3900774	T	G	T	G	M01361.metal.pos.txt.gz	IPF	0.061	-0.092209	0.988	0.97686	0.013	0.060914	2.701e-06	0.1301	5363	953873	0.00408871	22.0095
824	rs4960640	T	C	T	C	M01361.metal.pos.txt.gz	IPF	-0.0285	-0.070339	0.9667	0.95254	0.0064	0.044844	9.695e-06	0.1168	7063	953873	0.00279977	19.8247
825	rs6471261	T	G	T	G	M01361.metal.pos.txt.gz	IPF	0.0115	0.00069948	0.2806	0.2983	0.0025	0.020325	6.164e-06	0.9725	7063	953873	0.00298695	21.154
826	rs6472299	A	G	A	G	M01361.metal.pos.txt.gz	IPF	-0.0149	-0.023133	0.8381	0.825	0.0033	0.024649	7.866e-06	0.348	7063	953873	0.00287809	20.3808
827	rs6783294	A	G	A	G	M01361.metal.pos.txt.gz	IPF	-0.0213	-0.016629	0.4281	0.4111	0.0045	0.019023	2.41e-06	0.382	1700	953873	0.0130077	22.3781
828	rs6887589	A	G	A	G	M01361.metal.pos.txt.gz	IPF	-0.0142	-0.0094951	0.7787	0.7808	0.0026	0.022356	4.33e-08	0.671	7063	953873	0.00420543	29.82
829	rs7791503	T	C	T	C	M01361.metal.pos.txt.gz	IPF	0.0126	0.016411	0.269	0.3019	0.0026	0.022318	9.648e-07	0.4621	7063	903869	0.00331408	23.4786
830	rs961959	A	C	A	C	M01361.metal.pos.txt.gz	IPF	-0.0121	-0.014472	0.1925	0.2075	0.0027	0.024734	5.262e-06	0.5585	7063	903869	0.00283544	20.078
836	rs10005295	A	G	A	G	M01365.metal.pos.txt.gz	IPF	-0.0634	-0.0088721	0.0267	0.0451	0.0136	0.04514	3.398e-06	0.8442	1768	953873	0.0121426	21.7075
837	rs10164158	A	G	A	G	M01365.metal.pos.txt.gz	IPF	0.0229	0.040897	0.0577	0.065	0.005	0.03855	4.179e-06	0.2887	7362	953873	0.00284118	20.9707
838	rs10831497	A	G	A	G	M01365.metal.pos.txt.gz	IPF	0.0126	-0.01282	0.2209	0.2464	0.0028	0.021647	4.968e-06	0.5537	7362	953873	0.00274307	20.2445
839	rs11118120	A	C	A	C	M01365.metal.pos.txt.gz	IPF	-0.0175	0.012718	0.8534	0.8404	0.0033	0.025925	1.709e-07	0.6237	7362	953873	0.00380537	28.1145
840	rs12250605	T	C	T	C	M01365.metal.pos.txt.gz	IPF	0.0122	-0.0036771	0.751	0.6985	0.0026	0.021099	2.015e-06	0.8616	7362	953873	0.00298181	22.0118
841	rs12426539	T	C	T	C	M01365.metal.pos.txt.gz	IPF	0.0405	0.02381	0.0306	0.038	0.0091	0.057863	9.311e-06	0.6807	7362	887228	0.00268327	19.802
842	rs13393013	A	G	A	G	M01365.metal.pos.txt.gz	IPF	0.0415	0.048228	0.0218	0.03179	0.0085	0.053536	1.075e-06	0.3677	7362	953873	0.00322744	23.8309
843	rs17155949	T	C	T	C	M01365.metal.pos.txt.gz	IPF	0.0698	0.085105	0.9746	0.97743	0.0153	0.068918	4.752e-06	0.2169	1768	953873	0.0116349	20.7891
844	rs1936396	A	G	A	G	M01365.metal.pos.txt.gz	IPF	-0.0118	-0.041438	0.2253	0.2252	0.0026	0.022452	5.67e-06	0.06494	7362	953873	0.00279003	20.592
845	rs314241	T	C	T	C	M01365.metal.pos.txt.gz	IPF	-0.0114	0.0099232	0.4625	0.4661	0.0025	0.02043	5.249e-06	0.6272	7362	903869	0.00281649	20.788
846	rs35350	A	G	A	G	M01365.metal.pos.txt.gz	IPF	0.0397	0.034269	0.9722	0.9742	0.0089	0.071227	8.097e-06	0.6304	7362	887228	0.00269546	19.8922
847	rs3759526	T	C	T	C	M01365.metal.pos.txt.gz	IPF	-0.0209	-0.0057956	0.0806	0.08273	0.0043	0.036264	8.927e-07	0.873	7362	903869	0.00319866	23.6177
848	rs4109037	A	T	A	T	M01365.metal.pos.txt.gz	IPF	0.0162	0.018597	0.146	0.1376	0.0033	0.026634	9.489e-07	0.485	7362	953873	0.00326277	24.0926
849	rs4420815	A	G	A	G	M01365.metal.pos.txt.gz	IPF	-0.019	0.0046859	0.143	0.1596	0.004	0.025658	2.034e-06	0.8551	5594	953873	0.00401714	22.5544
850	rs453612	T	C	T	C	M01365.metal.pos.txt.gz	IPF	0.0114	-0.006225	0.3549	0.3717	0.0025	0.020974	5.854e-06	0.7666	7362	903869	0.00281649	20.788
851	rs4710948	A	G	A	G	M01365.metal.pos.txt.gz	IPF	-0.0115	-0.016428	0.3383	0.3608	0.0025	0.019441	4.85e-06	0.3981	7362	953873	0.00286598	21.1543
852	rs603424	A	G	A	G	M01365.metal.pos.txt.gz	IPF	0.0162	0.026081	0.1832	0.1555	0.0032	0.026619	5.756e-07	0.3272	7362	903869	0.00346917	25.6219
853	rs6665988	A	C	A	C	M01365.metal.pos.txt.gz	IPF	-0.0115	0.019801	0.7127	0.6846	0.0026	0.020344	9.113e-06	0.3304	7362	953873	0.00265033	19.5583
854	rs670365	A	G	A	G	M01365.metal.pos.txt.gz	IPF	0.039	-0.039118	0.0903	0.141	0.0088	0.026222	9.48e-06	0.1358	1768	953873	0.0109871	19.6188
855	rs7016645	T	C	T	C	M01365.metal.pos.txt.gz	IPF	-0.0117	0.00096722	0.253	0.2462	0.0026	0.021606	8.442e-06	0.9643	7362	953873	0.00274307	20.2445
856	rs7796330	T	C	T	C	M01365.metal.pos.txt.gz	IPF	0.0116	-0.020054	0.2727	0.2817	0.0026	0.022684	7.927e-06	0.3767	7362	903869	0.0026965	19.8999
862	rs11184997	A	T	A	T	M01444.metal.pos.txt.gz	IPF	0.0179	-0.013843	0.2894	0.2861	0.0039	0.022167	6.013e-06	0.5323	7345	903869	0.00285984	21.06
863	rs11718405	T	C	T	C	M01444.metal.pos.txt.gz	IPF	0.0216	-0.019134	0.8358	0.8365	0.0048	0.025346	8.433e-06	0.4503	7345	953873	0.0027494	20.2445
864	rs12725284	T	C	T	C	M01444.metal.pos.txt.gz	IPF	0.0315	-0.042759	0.1606	0.237	0.0056	0.022242	1.72e-08	0.05455	7345	932016	0.0042893	31.632
865	rs1476414	C	G	C	G	M01444.metal.pos.txt.gz	IPF	0.0397	-0.0057114	0.0535	0.0746	0.0081	0.036875	9.299e-07	0.8769	7345	953873	0.00325988	24.0156
866	rs3010320	A	T	A	T	M01444.metal.pos.txt.gz	IPF	-0.0205	-0.0085445	0.232	0.222	0.0042	0.025877	1.001e-06	0.7413	7345	887228	0.00323304	23.8172
867	rs35421463	A	G	A	G	M01444.metal.pos.txt.gz	IPF	0.0277	0.021257	0.4033	0.4017	0.006	0.019037	4.148e-06	0.2642	1753	953873	0.0120123	21.2893
868	rs3915237	T	G	T	G	M01444.metal.pos.txt.gz	IPF	-0.0182	0.018244	0.7005	0.6974	0.004	0.023842	5.519e-06	0.4442	7345	887228	0.00281066	20.6969
869	rs4443239	T	G	T	G	M01444.metal.pos.txt.gz	IPF	0.031	0.0079715	0.7453	0.7754	0.0069	0.022304	7.58e-06	0.7208	1753	953873	0.0113834	20.1618
870	rs4717457	A	C	A	C	M01444.metal.pos.txt.gz	IPF	0.0233	-0.037003	0.1392	0.134	0.0052	0.027741	6.802e-06	0.1822	7345	953873	0.00272601	20.0718
871	rs6497209	A	G	A	G	M01444.metal.pos.txt.gz	IPF	0.019	-0.041781	0.2139	0.2223	0.0042	0.022576	4.779e-06	0.06421	7345	953873	0.00277849	20.4593
872	rs7561932	T	C	T	C	M01444.metal.pos.txt.gz	IPF	0.0184	-0.0056729	0.7721	0.775	0.0042	0.024091	9.551e-06	0.8138	7345	903869	0.00260623	19.1875
873	rs7871735	T	G	T	G	M01444.metal.pos.txt.gz	IPF	0.0184	-0.0014316	0.2953	0.3014	0.004	0.02031	3.395e-06	0.9438	7345	953873	0.0028726	21.1542
874	rs9295427	A	G	A	G	M01444.metal.pos.txt.gz	IPF	0.0356	-0.012928	0.9408	0.93286	0.0077	0.038367	3.808e-06	0.7361	7345	953873	0.00290178	21.3698
875	rs9460045	T	C	T	C	M01444.metal.pos.txt.gz	IPF	-0.0529	-0.053989	0.9224	0.9185	0.0119	0.038274	8.911e-06	0.1584	1753	903869	0.0111472	19.7388
881	rs10900040	T	C	T	C	M01493.metal.pos.txt.gz	IPF	-0.0144	0.02653	0.8351	0.7853	0.0031	0.024716	3.401e-06	0.2831	7307	903869	0.0029443	21.5716
882	rs10945970	T	C	T	C	M01493.metal.pos.txt.gz	IPF	-0.011	0.012427	0.3103	0.3372	0.0025	0.019876	7.379e-06	0.5318	7307	953873	0.00264251	19.3547
883	rs11701867	A	C	A	C	M01493.metal.pos.txt.gz	IPF	-0.0136	-0.020345	0.1761	0.1903	0.0027	0.023694	2.753e-07	0.3905	7307	953873	0.00346024	25.3648
884	rs1192521	A	T	A	T	M01493.metal.pos.txt.gz	IPF	-0.0163	-0.0056291	0.7755	0.7466	0.0031	0.023057	1.402e-07	0.8071	7307	903869	0.0037694	27.6397
885	rs12300345	A	T	A	T	M01493.metal.pos.txt.gz	IPF	-0.0151	-0.0090518	0.132	0.1378	0.0034	0.029449	7.452e-06	0.7586	7307	903869	0.00269207	19.7186
886	rs13424082	A	G	A	G	M01493.metal.pos.txt.gz	IPF	-0.0125	-0.032202	0.1735	0.1848	0.0026	0.025791	1.799e-06	0.2118	7307	903869	0.00315328	23.1076
887	rs2351725	A	T	A	T	M01493.metal.pos.txt.gz	IPF	-0.0119	0.031192	0.7947	0.7933	0.0026	0.022965	5.841e-06	0.1744	7307	953873	0.00285868	20.9425
888	rs4812400	A	T	A	T	M01493.metal.pos.txt.gz	IPF	0.0178	0.034045	0.9092	0.90793	0.0039	0.031305	4.893e-06	0.2768	7307	953873	0.00284273	20.8253
889	rs6975921	A	G	A	G	M01493.metal.pos.txt.gz	IPF	0.0343	0.030587	0.9095	0.90875	0.0071	0.032671	1.246e-06	0.3492	1766	953873	0.013043	23.312
895	rs1001210	T	C	T	C	M01494.metal.pos.txt.gz	IPF	-0.0106	-0.0039761	0.8353	0.8507	0.0023	0.025962	3.798e-06	0.8783	7354	953873	0.00287992	21.2343
896	rs10853533	A	C	A	C	M01494.metal.pos.txt.gz	IPF	0.0103	0.032638	0.8743	0.874	0.0023	0.028175	6.086e-06	0.2467	7354	953873	0.00271965	20.0494
897	rs10890517	T	C	T	C	M01494.metal.pos.txt.gz	IPF	-0.0197	-0.0032932	0.0433	0.0396	0.0043	0.055061	3.448e-06	0.9523	7354	887228	0.002846	20.9835
898	rs12143589	A	G	A	G	M01494.metal.pos.txt.gz	IPF	0.0118	-0.0081565	0.1428	0.1821	0.0023	0.024209	3.381e-07	0.7362	7354	953873	0.00356642	26.3142
899	rs12294182	T	C	T	C	M01494.metal.pos.txt.gz	IPF	0.014	-0.0038194	0.0987	0.1607	0.0029	0.028114	1.071e-06	0.8919	7354	903869	0.00315909	23.2993
900	rs12550729	T	C	T	C	M01494.metal.pos.txt.gz	IPF	0.0637	0.017691	0.9233	0.9239	0.0029	0.03419	5.97e-110	0.6048	7354	953873	0.0615689	482.353
901	rs12611788	T	C	T	C	M01494.metal.pos.txt.gz	IPF	-0.007	0.049133	0.6267	0.6246	0.0015	0.019426	5.507e-06	0.01143	7354	953873	0.00295261	21.7719
902	rs13013224	C	G	C	G	M01494.metal.pos.txt.gz	IPF	0.0113	0.035683	0.1794	0.2018	0.0023	0.024971	7.044e-07	0.153	7354	937232	0.00327156	24.1314
903	rs13159409	T	G	T	G	M01494.metal.pos.txt.gz	IPF	-0.0148	-0.014049	0.0652	0.06459	0.0032	0.037967	2.741e-06	0.7114	7354	953873	0.00290027	21.3848
904	rs1578743	A	C	A	C	M01494.metal.pos.txt.gz	IPF	0.0075	-0.014491	0.6068	0.6203	0.0016	0.01921	1.7e-06	0.4507	7354	953873	0.00297895	21.9667
905	rs2068157	T	C	T	C	M01494.metal.pos.txt.gz	IPF	0.0137	0.02966	0.9144	0.91555	0.0031	0.034087	8.989e-06	0.3842	7354	953873	0.00264876	19.5254
906	rs2592916	T	C	T	C	M01494.metal.pos.txt.gz	IPF	-0.0123	0.017941	0.1013	0.09441	0.0027	0.030833	6.554e-06	0.5607	7354	953873	0.00281407	20.7474
907	rs4646693	T	C	T	C	M01494.metal.pos.txt.gz	IPF	-0.009	-0.033988	0.435	0.4247	0.002	0.020366	6.795e-06	0.09515	5592	903869	0.00360818	20.2428
908	rs5764925	A	G	A	G	M01494.metal.pos.txt.gz	IPF	-0.016	-0.003932	0.0772	0.09483	0.0031	0.033042	1.906e-07	0.9053	7354	953873	0.0036093	26.6317
909	rs7561255	A	G	A	G	M01494.metal.pos.txt.gz	IPF	-0.0072	-0.025016	0.7086	0.6964	0.0016	0.020381	4.719e-06	0.2197	7354	953873	0.00274604	20.2445
910	rs7973508	A	G	A	G	M01494.metal.pos.txt.gz	IPF	-0.0073	0.034306	0.2831	0.2996	0.0016	0.020556	5.403e-06	0.09514	7354	953873	0.00282263	20.8107
911	rs9964014	T	C	T	C	M01494.metal.pos.txt.gz	IPF	-0.0132	0.0030609	0.1115	0.136	0.0025	0.029653	1.796e-07	0.9178	7354	903869	0.0037766	27.8708
912	rs9987070	C	G	C	G	M01494.metal.pos.txt.gz	IPF	-0.028	-0.032273	0.9808	0.96747	0.0059	0.053219	2.432e-06	0.5442	7354	953873	0.00305324	22.5161
918	rs11719633	A	G	A	G	M01508.metal.pos.txt.gz	IPF	-0.0206	-0.027321	0.0945	0.08429	0.0044	0.033234	3.012e-06	0.411	7160	953873	0.00305203	21.9133
919	rs12544560	A	G	A	G	M01508.metal.pos.txt.gz	IPF	0.0164	-0.028049	0.148	0.1243	0.0035	0.027653	3.318e-06	0.3104	7160	953873	0.00305709	21.9498
920	rs13212846	A	C	A	C	M01508.metal.pos.txt.gz	IPF	-0.0241	0.029947	0.9252	0.92232	0.0052	0.03408	2.882e-06	0.3795	7160	953873	0.00299098	21.4737
921	rs1350858	A	C	A	C	M01508.metal.pos.txt.gz	IPF	0.0152	0.0015852	0.1783	0.1717	0.0034	0.026373	8.213e-06	0.9521	7160	903869	0.00278359	19.9806
922	rs1395	A	G	A	G	M01508.metal.pos.txt.gz	IPF	0.0172	0.0091462	0.7034	0.6971	0.0027	0.020276	8.138e-11	0.6519	7160	953873	0.00563588	40.5703
923	rs17049936	T	C	T	C	M01508.metal.pos.txt.gz	IPF	-0.0187	0.06529	0.8912	0.8579	0.0042	0.027085	9.584e-06	0.01593	7160	953873	0.00276103	19.8182
924	rs17082600	T	C	T	C	M01508.metal.pos.txt.gz	IPF	0.0476	0.21659	0.0193	0.0149	0.0094	0.072219	4.082e-07	0.002709	7160	953873	0.00356856	25.6352
925	rs17751805	A	G	A	G	M01508.metal.pos.txt.gz	IPF	0.0628	-0.012277	0.9645	0.96221	0.0135	0.049929	3.399e-06	0.8058	1650	953873	0.0129452	21.6135
926	rs1975271	T	C	T	C	M01508.metal.pos.txt.gz	IPF	0.0116	-0.012614	0.5872	0.5665	0.0026	0.020163	8.682e-06	0.5316	7160	903869	0.00277237	19.8998
927	rs2173615	T	G	T	G	M01508.metal.pos.txt.gz	IPF	0.0125	-0.0062696	0.3153	0.3405	0.0026	0.020031	1.693e-06	0.7543	7160	953873	0.00321781	23.1074
928	rs2526477	A	G	A	G	M01508.metal.pos.txt.gz	IPF	-0.012	0.016294	0.609	0.5759	0.0026	0.019015	2.988e-06	0.3915	7160	953873	0.00296628	21.2958
929	rs2967437	A	G	A	G	M01508.metal.pos.txt.gz	IPF	-0.0126	-0.063254	0.6902	0.6872	0.0027	0.019974	1.879e-06	0.001541	7160	953873	0.00303237	21.7717
930	rs3949865	C	G	C	G	M01508.metal.pos.txt.gz	IPF	-0.0115	0.02205	0.6187	0.6271	0.0026	0.020727	9.491e-06	0.2874	7160	903869	0.0027249	19.5581
931	rs4269521	A	G	A	G	M01508.metal.pos.txt.gz	IPF	0.0168	-0.078694	0.8431	0.8395	0.0034	0.027627	1.034e-06	0.004394	7160	903869	0.00339836	24.4084
932	rs4746017	A	C	A	C	M01508.metal.pos.txt.gz	IPF	-0.0122	0.032793	0.713	0.7311	0.0027	0.022314	5.098e-06	0.1417	7160	903869	0.00284343	20.4113
933	rs6034318	A	G	A	G	M01508.metal.pos.txt.gz	IPF	0.1083	-0.094664	0.013	0.01476	0.0236	0.086744	4.518e-06	0.2751	1650	903869	0.012602	21.0332
934	rs6774965	A	G	A	G	M01508.metal.pos.txt.gz	IPF	-0.0163	-0.024682	0.8582	0.8552	0.0035	0.026638	3.16e-06	0.3541	7160	953873	0.00302004	21.6829
935	rs6848070	A	G	A	G	M01508.metal.pos.txt.gz	IPF	-0.0117	-0.022328	0.3521	0.4006	0.0027	0.019324	9.911e-06	0.2479	7160	953873	0.00261573	18.7725
936	rs7009776	T	C	T	C	M01508.metal.pos.txt.gz	IPF	-0.0268	0.012479	0.3342	0.3676	0.006	0.019369	7.116e-06	0.5194	1650	953873	0.0119471	19.9269
937	rs7574257	T	C	T	C	M01508.metal.pos.txt.gz	IPF	0.0118	-0.016125	0.325	0.3391	0.0026	0.019829	7.764e-06	0.4161	7160	953873	0.00286851	20.5919
938	rs8065435	A	G	A	G	M01508.metal.pos.txt.gz	IPF	-0.0128	-0.032303	0.327	0.3425	0.0028	0.021909	5.034e-06	0.1404	7160	903869	0.00291022	20.8921
939	rs9365106	A	G	A	G	M01508.metal.pos.txt.gz	IPF	-0.0117	0.019935	0.6824	0.6522	0.0026	0.019877	8.055e-06	0.3159	7160	953873	0.00282024	20.2443
945	rs10205265	T	C	T	C	M01515.metal.pos.txt.gz	IPF	-0.0901	-0.017289	0.2056	0.1879	0.0202	0.023633	7.794e-06	0.4644	2285	953873	0.00863169	19.8777
946	rs10458721	A	G	A	G	M01515.metal.pos.txt.gz	IPF	-0.0786	0.013631	0.609	0.597	0.0175	0.020357	7.228e-06	0.5031	2285	903869	0.00875116	20.1553
947	rs10471169	T	C	T	C	M01515.metal.pos.txt.gz	IPF	0.9362	-0.055459	0.0105	0.06639	0.1854	0.035837	4.427e-07	0.1217	482	953873	0.0502438	25.3929
948	rs10977627	T	C	T	C	M01515.metal.pos.txt.gz	IPF	0.8146	0.025491	0.0168	0.02105	0.1524	0.063976	9.061e-08	0.6903	482	953873	0.0559581	28.452
949	rs11256026	A	G	A	G	M01515.metal.pos.txt.gz	IPF	-0.2061	0.0029503	0.6357	0.616	0.0409	0.0206	4.601e-07	0.8861	482	903869	0.0500455	25.2874
950	rs1164673	C	G	C	G	M01515.metal.pos.txt.gz	IPF	0.0754	-0.021633	0.3743	0.3755	0.0168	0.020576	7.267e-06	0.2931	2285	953873	0.00873829	20.1254
951	rs12005082	A	T	A	T	M01515.metal.pos.txt.gz	IPF	0.1232	-0.0044849	0.1814	0.2061	0.0265	0.024781	3.354e-06	0.8564	2285	903869	0.00937033	21.5948
952	rs12075728	T	G	T	G	M01515.metal.pos.txt.gz	IPF	-0.4196	0.056289	0.9442	0.93137	0.0922	0.037963	5.394e-06	0.1381	482	953873	0.0411994	20.6254
953	rs16832600	T	C	T	C	M01515.metal.pos.txt.gz	IPF	0.2205	0.027024	0.0297	0.0357	0.0469	0.047833	2.579e-06	0.5721	2285	953873	0.00958086	22.0847
954	rs16862165	T	C	T	C	M01515.metal.pos.txt.gz	IPF	-0.413	0.047187	0.99	0.98678	0.089	0.086218	3.477e-06	0.5842	1803	953873	0.0118023	21.5099
955	rs17682068	A	G	A	G	M01515.metal.pos.txt.gz	IPF	-0.1299	-0.022033	0.9248	0.93089	0.029	0.038041	7.452e-06	0.5625	2285	953873	0.00870441	20.0467
956	rs7701675	A	G	A	G	M01515.metal.pos.txt.gz	IPF	-0.7943	-0.065575	0.9839	0.98697	0.1733	0.086607	4.558e-06	0.449	482	903869	0.0417636	20.9202
957	rs8178289	A	C	A	C	M01515.metal.pos.txt.gz	IPF	-0.1064	-0.020114	0.8497	0.8409	0.0233	0.025312	5.095e-06	0.4268	2285	953873	0.00904357	20.8349
963	rs10004130	A	G	A	G	M01558.metal.pos.txt.gz	IPF	0.009	-0.021476	0.581	0.5886	0.002	0.01891	6.795e-06	0.2561	4915	953873	0.00410314	20.2418
964	rs10122824	T	G	T	G	M01558.metal.pos.txt.gz	IPF	0.0087	0.0065597	0.3503	0.3451	0.0019	0.019683	2.787e-06	0.7389	6523	953873	0.00320398	20.9603
965	rs10416031	A	G	A	G	M01558.metal.pos.txt.gz	IPF	0.0085	-0.0089003	0.3202	0.3039	0.0018	0.020476	3.84e-06	0.6638	6523	953873	0.00340693	22.2925
966	rs10496826	A	G	A	G	M01558.metal.pos.txt.gz	IPF	-0.008	-0.01105	0.2948	0.3234	0.0018	0.021594	7.767e-06	0.6089	6523	903869	0.00301908	19.747
967	rs11023380	A	G	A	G	M01558.metal.pos.txt.gz	IPF	0.0088	-0.0042048	0.4591	0.557	0.0018	0.020184	5.374e-07	0.835	6523	903869	0.00365077	23.8939
968	rs1113643	T	C	T	C	M01558.metal.pos.txt.gz	IPF	0.0094	-0.0051873	0.2769	0.2689	0.0018	0.021102	2.236e-07	0.8058	6523	953873	0.00416343	27.2632
969	rs11170032	T	C	T	C	M01558.metal.pos.txt.gz	IPF	-0.008	0.013416	0.64	0.6328	0.0018	0.022714	7.178e-06	0.5548	6523	887228	0.00301908	19.747
970	rs11650615	C	G	C	G	M01558.metal.pos.txt.gz	IPF	0.0081	-0.017048	0.6907	0.6947	0.0018	0.020469	5.987e-06	0.4049	6523	953873	0.00309479	20.2438
971	rs1280717	A	G	A	G	M01558.metal.pos.txt.gz	IPF	0.0094	-0.044288	0.2512	0.2414	0.0018	0.021667	2.006e-07	0.04095	6523	953873	0.00416343	27.2632
972	rs13164411	T	C	T	C	M01558.metal.pos.txt.gz	IPF	0.0082	0.012265	0.7246	0.7327	0.0018	0.020965	5.334e-06	0.5585	6523	953873	0.00317143	20.7467
973	rs1538330	T	G	T	G	M01558.metal.pos.txt.gz	IPF	-0.0306	-0.078031	0.0213	0.02126	0.0064	0.064542	1.728e-06	0.2267	6523	953873	0.00349234	22.8533
974	rs1556880	T	C	T	C	M01558.metal.pos.txt.gz	IPF	0.0081	-0.021608	0.2976	0.3003	0.0018	0.020525	6.043e-06	0.2925	6523	953873	0.00309479	20.2438
975	rs1604290	A	C	A	C	M01558.metal.pos.txt.gz	IPF	-0.0079	-0.0063981	0.3851	0.4003	0.0018	0.019064	8.13e-06	0.7372	6523	953873	0.00294429	19.2564
976	rs164742	A	G	A	G	M01558.metal.pos.txt.gz	IPF	-0.0079	-0.046884	0.4697	0.4553	0.0018	0.020175	7.375e-06	0.02013	6523	903869	0.00294429	19.2564
977	rs1812125	T	G	T	G	M01558.metal.pos.txt.gz	IPF	-0.0085	-0.034978	0.7578	0.7883	0.0018	0.024362	3.484e-06	0.1511	6523	903869	0.00340693	22.2925
978	rs2055056	T	C	T	C	M01558.metal.pos.txt.gz	IPF	-0.0244	-0.029617	0.968	0.96695	0.0055	0.049694	8.566e-06	0.5512	6523	953873	0.00300814	19.6753
979	rs2144834	A	G	A	G	M01558.metal.pos.txt.gz	IPF	0.008	0.016643	0.2535	0.2527	0.0018	0.0216	7.973e-06	0.441	6523	953873	0.00301908	19.747
980	rs2252585	T	C	T	C	M01558.metal.pos.txt.gz	IPF	-0.0081	-0.026308	0.7349	0.7475	0.0018	0.027153	5.967e-06	0.3326	6523	497920	0.00309479	20.2438
981	rs2290156	C	G	C	G	M01558.metal.pos.txt.gz	IPF	0.0088	-0.031305	0.2806	0.2818	0.0018	0.020635	1.05e-06	0.1293	6523	953873	0.00365077	23.8939
982	rs2604548	T	C	T	C	M01558.metal.pos.txt.gz	IPF	-0.0086	-0.028607	0.6463	0.6706	0.0018	0.021201	1.285e-06	0.1772	6523	903869	0.00348728	22.8202
983	rs3813810	A	C	A	C	M01558.metal.pos.txt.gz	IPF	0.0117	0.017797	0.1334	0.1371	0.0026	0.029299	5.725e-06	0.5436	6523	903869	0.00309479	20.2438
984	rs4443239	T	G	T	G	M01558.metal.pos.txt.gz	IPF	0.02	0.0079715	0.7446	0.7754	0.0042	0.022304	2.265e-06	0.7208	1608	953873	0.0139057	22.6475
985	rs4687937	T	C	T	C	M01558.metal.pos.txt.gz	IPF	-0.0079	-0.0030154	0.3741	0.3923	0.0018	0.020593	9.469e-06	0.8836	6523	903869	0.00294429	19.2564
986	rs4923082	T	C	T	C	M01558.metal.pos.txt.gz	IPF	0.0081	-0.023604	0.2518	0.2393	0.0018	0.02162	6.953e-06	0.2749	6523	953873	0.00309479	20.2438
987	rs604388	T	C	T	C	M01558.metal.pos.txt.gz	IPF	0.0086	-0.0099503	0.6845	0.6784	0.0018	0.020024	1.562e-06	0.6192	6523	953873	0.00348728	22.8202
988	rs6500864	A	G	A	G	M01558.metal.pos.txt.gz	IPF	-0.0083	0.0046918	0.2762	0.2853	0.0018	0.020756	4.339e-06	0.8212	6523	953873	0.00324901	21.2558
989	rs721399	T	C	T	C	M01558.metal.pos.txt.gz	IPF	-0.0289	0.00051762	0.7176	0.7092	0.0018	0.020579	3.948e-58	0.9799	6523	953873	0.0380164	257.702
990	rs7228099	T	C	T	C	M01558.metal.pos.txt.gz	IPF	-0.0097	0.026658	0.4364	0.4128	0.0018	0.018914	3.609e-08	0.1587	6523	953873	0.00443223	29.0312
991	rs7943587	A	C	A	C	M01558.metal.pos.txt.gz	IPF	-0.0115	0.020907	0.1515	0.1835	0.0026	0.024387	6.326e-06	0.3913	6523	953873	0.00299021	19.5576
992	rs890984	A	G	A	G	M01558.metal.pos.txt.gz	IPF	-0.012	-0.036969	0.1092	0.1021	0.0027	0.030197	6.908e-06	0.2208	6523	953873	0.00301908	19.747
993	rs9354329	T	C	T	C	M01558.metal.pos.txt.gz	IPF	-0.0081	0.0034477	0.6322	0.6162	0.0018	0.019201	5.104e-06	0.8575	6523	953873	0.00309479	20.2438
994	rs9940567	T	C	T	C	M01558.metal.pos.txt.gz	IPF	0.0095	-0.00075516	0.7319	0.7616	0.0018	0.023064	1.574e-07	0.9739	6523	903869	0.00425211	27.8464
1000	rs10245705	T	C	T	C	M01561.metal.pos.txt.gz	IPF	-0.0663	-0.19393	0.0181	0.01815	0.0127	0.070447	1.946e-07	0.005909	7276	953873	0.00373167	27.2458
1001	rs10935814	A	G	A	G	M01561.metal.pos.txt.gz	IPF	-0.037	0.044042	0.1006	0.1201	0.0083	0.028538	9.443e-06	0.1228	1759	953873	0.0111713	19.8497
1002	rs11145330	A	C	A	C	M01561.metal.pos.txt.gz	IPF	0.0324	0.0027691	0.8908	0.8735	0.0068	0.028733	1.945e-06	0.9232	1759	953873	0.012742	22.6766
1003	rs11992435	A	G	A	G	M01561.metal.pos.txt.gz	IPF	0.0327	-0.026412	0.9488	0.94657	0.0072	0.043033	6.383e-06	0.5394	7276	903869	0.00282689	20.6211
1004	rs1404410	C	G	C	G	M01561.metal.pos.txt.gz	IPF	-0.0236	0.022388	0.7853	0.7996	0.0052	0.023148	4.568e-06	0.3335	1759	953873	0.0115743	20.5742
1005	rs1532701	A	G	A	G	M01561.metal.pos.txt.gz	IPF	0.0137	0.032498	0.5456	0.5431	0.003	0.020123	5.074e-06	0.1063	7276	903869	0.002858	20.8487
1006	rs7930821	T	C	T	C	M01561.metal.pos.txt.gz	IPF	0.0666	-0.095725	0.0202	0.01824	0.0149	0.068582	7.53e-06	0.1628	1759	953873	0.0112307	19.9564
1012	rs10043015	T	C	T	C	M01564.metal.pos.txt.gz	IPF	0.0082	0.032147	0.7113	0.7084	0.0018	0.020466	5.582e-06	0.1162	7364	953873	0.00281026	20.7475
1013	rs10514735	A	G	A	G	M01564.metal.pos.txt.gz	IPF	0.0346	-0.034623	0.985	0.98196	0.0077	0.06793	6.505e-06	0.6103	7364	953873	0.00273444	20.1861
1014	rs10787308	A	G	A	G	M01564.metal.pos.txt.gz	IPF	-0.009	0.015818	0.2701	0.2525	0.0018	0.021159	6.039e-07	0.4547	7364	953873	0.00338341	24.9932
1015	rs11120725	A	G	A	G	M01564.metal.pos.txt.gz	IPF	-0.0181	-0.013148	0.4596	0.4578	0.0039	0.020251	4.609e-06	0.5162	1761	903869	0.0120834	21.5147
1016	rs12625828	T	G	T	G	M01564.metal.pos.txt.gz	IPF	0.0086	0.031916	0.3366	0.3584	0.0018	0.019542	2.055e-06	0.1024	7364	953873	0.00309025	22.821
1017	rs12803308	A	T	A	T	M01564.metal.pos.txt.gz	IPF	-0.0081	0.015425	0.6752	0.6617	0.0018	0.019916	5.967e-06	0.4386	7364	953873	0.00274232	20.2445
1018	rs13130021	T	C	T	C	M01564.metal.pos.txt.gz	IPF	-0.0089	-0.013796	0.4312	0.4157	0.0018	0.01894	1.411e-06	0.4664	7364	953873	0.00330889	24.4409
1019	rs13966	T	C	T	C	M01564.metal.pos.txt.gz	IPF	0.0082	-0.001655	0.467	0.4598	0.0019	0.018831	9.994e-06	0.93	7364	953873	0.00252296	18.621
1020	rs1404373	T	C	T	C	M01564.metal.pos.txt.gz	IPF	-0.0084	-0.016979	0.6525	0.6636	0.0018	0.019611	2.917e-06	0.3866	7364	953873	0.00294861	21.7719
1021	rs1530219	A	G	A	G	M01564.metal.pos.txt.gz	IPF	-0.0078	-0.0075179	0.4797	0.4988	0.0018	0.02003	9.942e-06	0.7074	7364	903869	0.00254346	18.7727
1022	rs170149	A	G	A	G	M01564.metal.pos.txt.gz	IPF	0.0256	-0.042239	0.074	0.0615	0.0035	0.040426	1.421e-13	0.2961	7364	903869	0.00721251	53.4842
1023	rs17804635	T	C	T	C	M01564.metal.pos.txt.gz	IPF	-0.0187	-0.030022	0.0934	0.1038	0.0034	0.030337	3.623e-08	0.3224	7364	953873	0.00409102	30.2418
1024	rs2143327	T	C	T	C	M01564.metal.pos.txt.gz	IPF	0.0392	-0.027152	0.0129	0.01443	0.0085	0.078358	4.276e-06	0.729	7364	903869	0.00287984	21.2626
1025	rs2236299	A	G	A	G	M01564.metal.pos.txt.gz	IPF	0.0087	-0.0065937	0.3065	0.2612	0.0018	0.021168	1.694e-06	0.7554	7364	953873	0.00316231	23.3548
1026	rs2370136	T	C	T	C	M01564.metal.pos.txt.gz	IPF	-0.0086	-0.0045216	0.4875	0.5085	0.0018	0.018805	1.249e-06	0.81	7364	953873	0.00309025	22.821
1027	rs3193970	T	C	T	C	M01564.metal.pos.txt.gz	IPF	0.0081	0.019103	0.5801	0.5737	0.0018	0.020281	6.065e-06	0.3462	7364	903869	0.00274232	20.2445
1028	rs4589188	A	G	A	G	M01564.metal.pos.txt.gz	IPF	0.0122	0.027816	0.2827	0.2794	0.0026	0.022525	3.343e-06	0.2169	7364	903869	0.002981	22.0118
1029	rs4779800	A	G	A	G	M01564.metal.pos.txt.gz	IPF	-0.0122	-0.026631	0.8831	0.8799	0.0027	0.033923	6.056e-06	0.4324	7364	887228	0.00276488	20.4115
1030	rs6077792	T	G	T	G	M01564.metal.pos.txt.gz	IPF	-0.0085	0.023187	0.3	0.3036	0.0018	0.020261	2.821e-06	0.2524	7364	953873	0.00301902	22.2933
1031	rs6678076	A	G	A	G	M01564.metal.pos.txt.gz	IPF	-0.0252	0.051279	0.0339	0.04676	0.0052	0.044971	1.084e-06	0.2542	7364	953873	0.00317905	23.4788
1032	rs7105815	A	G	A	G	M01564.metal.pos.txt.gz	IPF	0.0091	-0.012956	0.2968	0.2947	0.0018	0.021992	4.934e-07	0.5558	7364	903869	0.00345875	25.5517
1033	rs7152965	A	G	A	G	M01564.metal.pos.txt.gz	IPF	0.0079	-0.015619	0.4052	0.4345	0.0018	0.018926	9.004e-06	0.4092	7364	953873	0.00260892	19.2571
1034	rs7584253	A	C	A	C	M01564.metal.pos.txt.gz	IPF	0.0083	0.041921	0.7047	0.711	0.0018	0.020612	5.043e-06	0.04197	7364	953873	0.00287902	21.2566
1035	rs7710027	T	C	T	C	M01564.metal.pos.txt.gz	IPF	0.0081	-0.012822	0.2886	0.2976	0.0018	0.021974	9.155e-06	0.5596	7364	903869	0.00274232	20.2445
1036	rs7919076	T	C	T	C	M01564.metal.pos.txt.gz	IPF	-0.0081	0.028538	0.3416	0.3081	0.0018	0.020061	7.791e-06	0.1549	7364	953873	0.00274232	20.2445
1037	rs835154	A	G	A	G	M01564.metal.pos.txt.gz	IPF	-0.0114	0.0005087	0.5753	0.5541	0.0018	0.020284	1.147e-10	0.98	7364	903869	0.00541741	40.1002
1038	rs868395	T	G	T	G	M01564.metal.pos.txt.gz	IPF	0.0101	0.010528	0.6653	0.6456	0.0018	0.021005	2.031e-08	0.6162	7364	903869	0.00425727	31.476
1039	rs889128	T	G	T	G	M01564.metal.pos.txt.gz	IPF	0.0082	-0.026981	0.6665	0.6428	0.0018	0.022414	6.754e-06	0.2287	7364	887228	0.00281026	20.7475
1040	rs910616	T	C	T	C	M01564.metal.pos.txt.gz	IPF	-0.0093	0.00060609	0.4991	0.4963	0.0018	0.018709	1.972e-07	0.9742	7364	953873	0.0036119	26.6872
1041	rs9327706	A	C	A	C	M01564.metal.pos.txt.gz	IPF	0.0081	0.031318	0.5937	0.5921	0.0018	0.019059	5.612e-06	0.1004	7364	953873	0.00274232	20.2445
1042	rs9389071	A	G	A	G	M01564.metal.pos.txt.gz	IPF	-0.012	-0.011772	0.1579	0.1455	0.0026	0.026343	5.638e-06	0.655	7364	953873	0.00288435	21.296
1043	rs940697	A	G	A	G	M01564.metal.pos.txt.gz	IPF	0.0082	0.01455	0.2701	0.2676	0.0018	0.020838	5.706e-06	0.485	7364	953873	0.00281026	20.7475
1049	rs11061416	A	G	A	G	M01572.metal.pos.txt.gz	IPF	-0.0125	0.0056924	0.6428	0.6638	0.0024	0.021118	1.763e-07	0.7875	7333	903869	0.00368563	27.1193
1050	rs11618222	T	C	T	C	M01572.metal.pos.txt.gz	IPF	-0.0182	-0.019411	0.1008	0.191	0.004	0.024853	5.999e-06	0.4348	7333	819655	0.00281525	20.6969
1051	rs11724197	A	G	A	G	M01572.metal.pos.txt.gz	IPF	0.0159	0.036337	0.8734	0.8597	0.0034	0.026457	2.294e-06	0.1696	7333	953873	0.00297346	21.8634
1052	rs12507784	A	G	A	G	M01572.metal.pos.txt.gz	IPF	-0.012	-0.018779	0.2395	0.2353	0.0025	0.02185	1.782e-06	0.3901	7333	953873	0.00313212	23.0337
1053	rs12866131	A	C	A	C	M01572.metal.pos.txt.gz	IPF	0.011	-0.01456	0.2805	0.2683	0.0024	0.020979	5.615e-06	0.4877	7333	953873	0.00285653	21.0012
1054	rs13102848	C	G	C	G	M01572.metal.pos.txt.gz	IPF	-0.0152	-0.00053692	0.8686	0.8614	0.0033	0.028169	3.132e-06	0.9848	7333	953873	0.00288485	21.21
1055	rs17011367	T	C	T	C	M01572.metal.pos.txt.gz	IPF	0.0115	-0.010209	0.7325	0.7243	0.0026	0.021002	7.378e-06	0.6269	7333	953873	0.00266079	19.5583
1056	rs17086746	T	C	T	C	M01572.metal.pos.txt.gz	IPF	-0.046	0.027445	0.02	0.02403	0.01	0.061069	4.225e-06	0.6531	5585	953873	0.00377442	21.1524
1057	rs17131975	A	G	A	G	M01572.metal.pos.txt.gz	IPF	-0.0216	-0.13374	0.0607	0.0313	0.0048	0.054952	8.184e-06	0.01494	7333	953873	0.00275388	20.2445
1058	rs2643891	A	G	A	G	M01572.metal.pos.txt.gz	IPF	-0.018	-0.0041098	0.165	0.1962	0.004	0.025933	6.795e-06	0.8741	5585	903869	0.00361268	20.2427
1059	rs6896132	C	G	C	G	M01572.metal.pos.txt.gz	IPF	0.0121	-0.0053481	0.219	0.2643	0.0025	0.023204	1.801e-06	0.8177	7333	937232	0.00318437	23.4192
1060	rs7861435	C	G	C	G	M01572.metal.pos.txt.gz	IPF	-0.0115	0.016199	0.7685	0.7586	0.0025	0.023784	4.012e-06	0.4958	7333	903869	0.00287728	21.1542
1061	rs884870	C	G	C	G	M01572.metal.pos.txt.gz	IPF	-0.0202	0.016517	0.0689	0.0634	0.0045	0.039947	7.402e-06	0.6793	7333	903869	0.00274034	20.1446
1067	rs1577941	A	G	A	G	M01573.metal.pos.txt.gz	IPF	0.0531	0.027037	0.1187	0.1484	0.0114	0.028757	3.485e-06	0.3471	2315	903869	0.0092849	21.6772
1068	rs16887484	A	G	A	G	M01573.metal.pos.txt.gz	IPF	-0.0991	-0.0077125	0.9585	0.93994	0.0201	0.045345	8.815e-07	0.8649	1646	903869	0.0145532	24.2788
1069	rs2846365	A	G	A	G	M01573.metal.pos.txt.gz	IPF	0.0336	0.032947	0.4476	0.4699	0.0071	0.018716	1.976e-06	0.07835	2315	953873	0.00958141	22.3762
1070	rs4661299	T	G	T	G	M01573.metal.pos.txt.gz	IPF	0.0319	0.007235	0.4551	0.4648	0.0071	0.018746	7.63e-06	0.6995	2315	953873	0.00864456	20.1692
1071	rs4948051	T	C	T	C	M01573.metal.pos.txt.gz	IPF	0.0528	-4.2179e-05	0.1328	0.1467	0.0115	0.028587	4.836e-06	0.9988	1646	903869	0.0126449	21.0545
1072	rs7137298	C	G	C	G	M01573.metal.pos.txt.gz	IPF	-0.0457	0.010657	0.176	0.1932	0.0103	0.023681	8.822e-06	0.6527	1646	953873	0.0118186	19.6621
1073	rs7438272	T	C	T	C	M01573.metal.pos.txt.gz	IPF	0.0589	0.043978	0.1691	0.1714	0.0123	0.027207	1.802e-06	0.106	2315	903869	0.00980819	22.9111
1074	rs9353315	A	G	A	G	M01573.metal.pos.txt.gz	IPF	-0.0476	-0.069815	0.8731	0.8653	0.0105	0.026695	5.856e-06	0.008915	2315	953873	0.00879926	20.5334
1080	rs10125203	C	G	C	G	M01585.metal.pos.txt.gz	IPF	0.009	-0.014377	0.8698	0.8569	0.0018	0.028903	4.109e-07	0.6189	7271	903869	0.00342654	24.9931
1081	rs10757735	A	C	A	C	M01585.metal.pos.txt.gz	IPF	-0.008	0.013674	0.132	0.1351	0.0018	0.027106	7.911e-06	0.6139	7271	953873	0.00270933	19.7477
1082	rs10850426	T	G	T	G	M01585.metal.pos.txt.gz	IPF	0.0081	0.023528	0.1199	0.09962	0.0018	0.036082	6.845e-06	0.5143	7271	887228	0.0027773	20.2444
1083	rs11045425	A	G	A	G	M01585.metal.pos.txt.gz	IPF	0.0086	-0.014451	0.1266	0.1246	0.0018	0.029939	1.832e-06	0.6293	7271	903869	0.00312965	22.8209
1084	rs11144136	T	G	T	G	M01585.metal.pos.txt.gz	IPF	0.0097	0.016643	0.1375	0.1334	0.0018	0.027018	4.862e-08	0.5379	7271	953873	0.00397808	29.0321
1085	rs11606364	T	C	T	C	M01585.metal.pos.txt.gz	IPF	0.0084	0.0029546	0.1149	0.09774	0.0019	0.033826	9.266e-06	0.9304	7271	903869	0.00268097	19.5403
1086	rs1554074	A	G	A	G	M01585.metal.pos.txt.gz	IPF	0.0086	-0.019647	0.1925	0.1816	0.0017	0.02411	6.392e-07	0.4151	7271	953873	0.00350735	25.5847
1087	rs2019107	T	C	T	C	M01585.metal.pos.txt.gz	IPF	-0.0078	0.024531	0.6257	0.5886	0.0017	0.022055	6.655e-06	0.266	7271	887228	0.00288697	21.0461
1088	rs2486925	T	G	T	G	M01585.metal.pos.txt.gz	IPF	-0.0082	0.02071	0.1462	0.1384	0.0018	0.028998	3.467e-06	0.4751	7271	903869	0.0028461	20.7474
1089	rs2596194	A	T	A	T	M01585.metal.pos.txt.gz	IPF	-0.0083	-0.0072941	0.1255	0.1266	0.0018	0.033336	2.586e-06	0.8268	7271	887228	0.00291574	21.2565
1090	rs266742	T	G	T	G	M01585.metal.pos.txt.gz	IPF	0.0082	0.021367	0.7307	0.6872	0.0016	0.021444	5.676e-07	0.3191	7271	903869	0.00359938	26.2584
1091	rs513209	A	C	A	C	M01585.metal.pos.txt.gz	IPF	-0.0082	0.021805	0.8824	0.8686	0.0018	0.029078	6.602e-06	0.4533	7271	819655	0.0028461	20.7474
1092	rs6019504	A	G	A	G	M01585.metal.pos.txt.gz	IPF	0.008	-0.039092	0.8586	0.8512	0.0018	0.027828	6.689e-06	0.1601	7271	903869	0.00270933	19.7477
1093	rs6462723	A	G	A	G	M01585.metal.pos.txt.gz	IPF	-0.0085	0.0021668	0.121	0.1189	0.0018	0.028388	1.921e-06	0.9392	7271	953873	0.00305752	22.2932
1094	rs662760	A	C	A	C	M01585.metal.pos.txt.gz	IPF	0.0079	-0.040364	0.8723	0.8748	0.0018	0.027709	8.042e-06	0.1452	7271	953873	0.0026422	19.257
1095	rs6690829	T	C	T	C	M01585.metal.pos.txt.gz	IPF	-0.008	-0.0037138	0.24	0.2596	0.0016	0.021264	1.242e-06	0.8613	7271	953873	0.00342654	24.9931
1096	rs7178551	T	C	T	C	M01585.metal.pos.txt.gz	IPF	0.0081	-0.037111	0.1545	0.1742	0.0017	0.024456	2.664e-06	0.1291	7271	953873	0.00311261	22.6962
1097	rs7250750	T	G	T	G	M01585.metal.pos.txt.gz	IPF	0.0081	-0.031878	0.8583	0.8492	0.0018	0.026242	7.029e-06	0.2244	7271	953873	0.0027773	20.2444
1098	rs732426	A	G	A	G	M01585.metal.pos.txt.gz	IPF	0.0077	0.033243	0.8218	0.7804	0.0017	0.02409	7.541e-06	0.1676	7271	903869	0.00281362	20.5099
1099	rs9663814	A	G	A	G	M01585.metal.pos.txt.gz	IPF	0.0076	0.011257	0.6175	0.6135	0.0016	0.019083	1.952e-06	0.5553	7271	953873	0.00309348	22.5563
1105	rs10490734	A	G	A	G	M01604.metal.pos.txt.gz	IPF	0.0077	-0.010663	0.8314	0.8112	0.0017	0.024422	7.935e-06	0.6624	7371	953873	0.00277556	20.51
1106	rs11130013	T	C	T	C	M01604.metal.pos.txt.gz	IPF	-0.0081	-0.013496	0.153	0.1316	0.0018	0.027434	5.094e-06	0.6228	7371	953873	0.00273973	20.2445
1107	rs11741189	T	C	T	C	M01604.metal.pos.txt.gz	IPF	-0.0087	0.065668	0.177	0.1658	0.0017	0.024945	3.781e-07	0.008476	7371	953873	0.00354058	26.1832
1108	rs1286087	T	C	T	C	M01604.metal.pos.txt.gz	IPF	0.0077	-0.011474	0.8367	0.863	0.0017	0.026572	8.083e-06	0.6659	7371	953873	0.00277556	20.51
1109	rs13318012	T	C	T	C	M01604.metal.pos.txt.gz	IPF	-0.0078	-0.0078751	0.8378	0.8142	0.0017	0.023678	8.359e-06	0.7394	7371	953873	0.00284791	21.0462
1110	rs233340	A	G	A	G	M01604.metal.pos.txt.gz	IPF	-0.0125	-0.011477	0.0707	0.0817	0.0026	0.034723	2.535e-06	0.741	7371	953873	0.00312599	23.1076
1111	rs235320	A	G	A	G	M01604.metal.pos.txt.gz	IPF	-0.0079	0.0062514	0.8241	0.8281	0.0017	0.024177	3.677e-06	0.796	7371	953873	0.00292119	21.5893
1112	rs510032	T	C	T	C	M01604.metal.pos.txt.gz	IPF	0.009	-0.012517	0.169	0.2025	0.002	0.023122	6.795e-06	0.5883	5604	953873	0.00360048	20.2428
1113	rs6731691	A	G	A	G	M01604.metal.pos.txt.gz	IPF	-0.008	0.013494	0.1705	0.161	0.0018	0.02487	5.301e-06	0.5874	7371	953873	0.00267268	19.7477
1114	rs6927639	A	G	A	G	M01604.metal.pos.txt.gz	IPF	-0.0078	0.0075343	0.8458	0.8158	0.0018	0.02449	9.274e-06	0.7583	7371	953873	0.00254105	18.7727
1115	rs7906282	T	G	T	G	M01604.metal.pos.txt.gz	IPF	0.008	0.022517	0.3075	0.2848	0.0016	0.020588	1.105e-06	0.2741	7371	953873	0.00338021	24.9932
1116	rs872114	A	C	A	C	M01604.metal.pos.txt.gz	IPF	-0.0208	-0.15213	0.9736	0.97836	0.0044	0.0611	2.294e-06	0.01278	7371	953873	0.0030226	22.341
1117	rs938554	C	G	C	G	M01604.metal.pos.txt.gz	IPF	-0.0348	-0.0058003	0.2256	0.2047	0.0017	0.022691	5.85e-93	0.7982	7371	953873	0.0537924	418.931
1118	rs9549021	T	C	T	C	M01604.metal.pos.txt.gz	IPF	-0.0135	0.010905	0.6112	0.6275	0.0029	0.020805	2.944e-06	0.6002	1767	903869	0.0121155	21.6461
1119	rs9557545	A	T	A	T	M01604.metal.pos.txt.gz	IPF	0.018	-0.015131	0.032	0.05904	0.004	0.042899	7.829e-06	0.7243	7371	953873	0.00273973	20.2445
1125	rs10174534	A	G	A	G	M01605.metal.pos.txt.gz	IPF	-0.028	0.022002	0.5571	0.5277	0.0063	0.020279	7.572e-06	0.2779	5162	903869	0.00381205	19.7454
1126	rs12587564	A	G	A	G	M01605.metal.pos.txt.gz	IPF	0.0456	0.035894	0.1148	0.1023	0.0097	0.030178	2.63e-06	0.2343	5162	953873	0.00426298	22.0911
1127	rs2720445	T	C	T	C	M01605.metal.pos.txt.gz	IPF	0.033	0.01006	0.536	0.5445	0.0073	0.019212	5.56e-06	0.6005	4207	953873	0.00483398	20.4256
1128	rs312306	C	G	C	G	M01605.metal.pos.txt.gz	IPF	-0.0654	-0.011386	0.2278	0.2382	0.0145	0.022068	6.231e-06	0.6059	955	953873	0.0208575	20.3006
1129	rs3760877	T	C	T	C	M01605.metal.pos.txt.gz	IPF	0.0577	0.011552	0.4762	0.4761	0.013	0.023187	9.553e-06	0.6183	955	887228	0.0202113	19.6587
1130	rs6763802	T	G	T	G	M01605.metal.pos.txt.gz	IPF	-0.0576	0.0027705	0.0798	0.0866	0.0116	0.03383	6.503e-07	0.9347	5162	953873	0.00475381	24.6468
1131	rs9573265	T	C	T	C	M01605.metal.pos.txt.gz	IPF	0.2216	0.086055	0.0158	0.02536	0.0488	0.064706	5.552e-06	0.1835	955	953873	0.0211358	20.5773
1137	rs11114987	T	C	T	C	M01638.metal.pos.txt.gz	IPF	-0.0324	-0.026064	0.0439	0.03666	0.0067	0.055204	1.414e-06	0.6368	7104	903869	0.00328103	23.3786
1138	rs1153903	A	G	A	G	M01638.metal.pos.txt.gz	IPF	-0.0106	0.044634	0.3856	0.4019	0.0023	0.01908	4.187e-06	0.01932	7104	953873	0.00298096	21.2341
1139	rs17706531	A	G	A	G	M01638.metal.pos.txt.gz	IPF	0.0105	-0.0096815	0.6331	0.6535	0.0023	0.019628	6.973e-06	0.6218	7104	953873	0.00292515	20.8353
1140	rs2180566	T	C	T	C	M01638.metal.pos.txt.gz	IPF	-0.0109	0.0025083	0.6433	0.6301	0.0023	0.02298	2.105e-06	0.9131	7104	753010	0.00315154	22.453
1141	rs2916148	A	G	A	G	M01638.metal.pos.txt.gz	IPF	-0.0101	0.0092854	0.4534	0.4212	0.0023	0.020368	9.235e-06	0.6485	7104	903869	0.00270712	19.2781
1142	rs2933871	A	G	A	G	M01638.metal.pos.txt.gz	IPF	0.0178	-0.038943	0.6938	0.7378	0.004	0.022584	7.648e-06	0.08464	1735	903869	0.0112847	19.7797
1143	rs3011362	A	G	A	G	M01638.metal.pos.txt.gz	IPF	-0.0349	-0.040403	0.0334	0.04691	0.0074	0.04461	2.37e-06	0.3651	1735	953873	0.0126577	22.2171
1144	rs511304	A	C	A	C	M01638.metal.pos.txt.gz	IPF	0.0191	0.014806	0.4368	0.4525	0.0039	0.022665	1.014e-06	0.5136	1735	705855	0.0136356	23.9572
1145	rs6479442	A	C	A	C	M01638.metal.pos.txt.gz	IPF	0.0101	-0.012386	0.4837	0.4983	0.0023	0.018705	9.586e-06	0.5079	7104	953873	0.00270712	19.2781
1146	rs6920504	T	C	T	C	M01638.metal.pos.txt.gz	IPF	-0.0135	0.041339	0.7729	0.7816	0.003	0.024005	7.527e-06	0.08505	7104	903869	0.0028424	20.2443
1147	rs7036499	T	C	T	C	M01638.metal.pos.txt.gz	IPF	0.0217	-0.0174	0.8519	0.86	0.0049	0.026704	8.857e-06	0.5147	1735	953873	0.0111775	19.5896
1148	rs715	T	C	T	C	M01638.metal.pos.txt.gz	IPF	0.0144	-0.017156	0.7064	0.6888	0.0028	0.019995	2.902e-07	0.3909	7104	953873	0.0037093	26.4415
1149	rs720118	T	C	T	C	M01638.metal.pos.txt.gz	IPF	-0.0105	0.0056782	0.6152	0.6113	0.0023	0.020602	4.547e-06	0.7828	7104	903869	0.00292515	20.8353
1150	rs7717247	A	C	A	C	M01638.metal.pos.txt.gz	IPF	0.0162	0.043023	0.8061	0.8337	0.0035	0.025104	3.347e-06	0.08658	7104	953873	0.00300665	21.4176
1151	rs901272	A	C	A	C	M01638.metal.pos.txt.gz	IPF	-0.0105	0.015735	0.6207	0.6236	0.0023	0.019224	6.493e-06	0.4131	7104	953873	0.00292515	20.8353
1157	rs11167905	T	C	T	C	M01640.metal.pos.txt.gz	IPF	0.0804	0.0050349	0.8545	0.8562	0.0164	0.028468	9.826e-07	0.8596	2063	903869	0.0115158	24.0106
1158	rs13069990	T	C	T	C	M01640.metal.pos.txt.gz	IPF	-0.0506	0.0072599	0.3781	0.3866	0.011	0.020537	4.442e-06	0.7237	2063	903869	0.0101528	21.1395
1159	rs13103690	T	G	T	G	M01640.metal.pos.txt.gz	IPF	-0.0474	-0.013058	0.5359	0.5434	0.0104	0.018674	5.195e-06	0.4844	2063	953873	0.00996873	20.7524
1160	rs2070006	T	C	T	C	M01640.metal.pos.txt.gz	IPF	0.0512	-0.024639	0.3713	0.4001	0.0112	0.019098	4.762e-06	0.197	2063	953873	0.0100283	20.8777
1161	rs577596	A	G	A	G	M01640.metal.pos.txt.gz	IPF	-0.0567	-0.012136	0.3267	0.3656	0.0114	0.023428	6.679e-07	0.6044	2063	887228	0.011849	24.7136
1162	rs6713914	T	C	T	C	M01640.metal.pos.txt.gz	IPF	0.0593	-0.02346	0.5741	0.5511	0.0116	0.018719	3.22e-07	0.2101	1567	953873	0.0164037	26.0999
1163	rs6826474	T	C	T	C	M01640.metal.pos.txt.gz	IPF	-0.1383	0.078636	0.0393	0.02792	0.0288	0.054921	1.561e-06	0.1522	2063	953873	0.0110543	23.0376
1164	rs6834631	T	G	T	G	M01640.metal.pos.txt.gz	IPF	0.1306	0.031997	0.9596	0.96524	0.0267	0.049276	1.032e-06	0.5161	2063	953873	0.0114645	23.9025
1165	rs7112460	T	C	T	C	M01640.metal.pos.txt.gz	IPF	0.1084	-0.010784	0.0658	0.05683	0.0223	0.039113	1.135e-06	0.7828	2063	953873	0.0113241	23.6063
1166	rs8057559	T	C	T	C	M01640.metal.pos.txt.gz	IPF	0.1395	-0.031934	0.0312	0.02517	0.0314	0.062009	9.098e-06	0.6066	2063	937232	0.00947664	19.7182
1167	rs808686	A	G	A	G	M01640.metal.pos.txt.gz	IPF	0.0598	0.00033586	0.6086	0.5414	0.0128	0.020226	3.013e-06	0.9868	1567	903869	0.0137374	21.7986
1168	rs8105491	T	G	T	G	M01640.metal.pos.txt.gz	IPF	-0.0698	-0.00043864	0.154	0.1588	0.0148	0.02545	2.304e-06	0.9862	2063	953873	0.0106667	22.2211
1169	rs9606290	A	G	A	G	M01640.metal.pos.txt.gz	IPF	0.159	0.02584	0.241	0.2265	0.0352	0.024326	6.316e-06	0.2881	496	903869	0.0395111	20.3214
1175	rs10092877	T	C	T	C	M01644.metal.pos.txt.gz	IPF	0.0087	-0.0072193	0.4173	0.383	0.0018	0.020686	1.25e-06	0.7271	7355	903869	0.00316617	23.3548
1176	rs10153405	A	G	A	G	M01644.metal.pos.txt.gz	IPF	-0.0103	-0.01793	0.5342	0.5631	0.0018	0.020197	9.267e-09	0.3747	7355	903869	0.00443218	32.7349
1177	rs10266726	T	C	T	C	M01644.metal.pos.txt.gz	IPF	-0.0083	-0.0031901	0.4261	0.4098	0.0018	0.018944	4.002e-06	0.8663	7355	953873	0.00288254	21.2566
1178	rs10492225	T	C	T	C	M01644.metal.pos.txt.gz	IPF	-0.0128	0.01595	0.8498	0.8498	0.0027	0.02621	1.596e-06	0.5428	7355	953873	0.00304638	22.4685
1179	rs10740323	T	C	T	C	M01644.metal.pos.txt.gz	IPF	0.0084	0.0036098	0.5935	0.5451	0.0018	0.018938	4.096e-06	0.8488	7355	953873	0.00295221	21.7719
1180	rs10848196	A	G	A	G	M01644.metal.pos.txt.gz	IPF	-0.0098	0.010941	0.5584	0.558	0.0018	0.018833	5.252e-08	0.5613	7355	953873	0.004014	29.6339
1181	rs13002121	A	G	A	G	M01644.metal.pos.txt.gz	IPF	0.0115	0.00086354	0.766	0.7396	0.0026	0.021415	6.943e-06	0.9678	7355	953873	0.00265285	19.5583
1182	rs13109093	A	C	A	C	M01644.metal.pos.txt.gz	IPF	0.0085	0.015697	0.614	0.6172	0.0018	0.020715	4.247e-06	0.4486	7355	903869	0.0030227	22.2933
1183	rs17002476	T	C	T	C	M01644.metal.pos.txt.gz	IPF	-0.0119	-0.013701	0.1459	0.1685	0.0027	0.027418	8.317e-06	0.6173	7355	937232	0.00263414	19.42
1184	rs17287933	T	C	T	C	M01644.metal.pos.txt.gz	IPF	0.0083	0.027423	0.4687	0.4756	0.0018	0.020227	5.243e-06	0.1752	7355	903869	0.00288254	21.2566
1185	rs17520583	A	G	A	G	M01644.metal.pos.txt.gz	IPF	0.0093	-0.013757	0.332	0.3104	0.0018	0.02023	3.599e-07	0.4965	7355	953873	0.0036163	26.6872
1186	rs17739107	A	G	A	G	M01644.metal.pos.txt.gz	IPF	-0.0198	-0.0086126	0.942	0.94854	0.0044	0.04042	8.091e-06	0.8313	7355	953873	0.00274567	20.2445
1187	rs1836862	A	C	A	C	M01644.metal.pos.txt.gz	IPF	-0.008	-0.012824	0.6051	0.6131	0.0018	0.020646	9.366e-06	0.5345	7355	903869	0.00267847	19.7477
1188	rs1866411	A	C	A	C	M01644.metal.pos.txt.gz	IPF	-0.0083	-0.012572	0.3473	0.3498	0.0018	0.02211	5.232e-06	0.5696	7355	621641	0.00288254	21.2566
1189	rs1889463	T	C	T	C	M01644.metal.pos.txt.gz	IPF	0.0089	-0.025273	0.628	0.6378	0.0019	0.02199	3.358e-06	0.2504	7355	903869	0.00297438	21.9359
1190	rs2291199	A	G	A	G	M01644.metal.pos.txt.gz	IPF	0.0083	-0.010779	0.5373	0.5222	0.0018	0.018704	5.175e-06	0.5644	7355	953873	0.00288254	21.2566
1191	rs269194	A	C	A	C	M01644.metal.pos.txt.gz	IPF	-0.0081	0.0027701	0.4386	0.4518	0.0018	0.020112	9.008e-06	0.8905	7355	903869	0.00274567	20.2445
1192	rs4618485	A	G	A	G	M01644.metal.pos.txt.gz	IPF	-0.0085	-0.0035671	0.595	0.6013	0.0018	0.020576	3.037e-06	0.8624	7355	903869	0.0030227	22.2933
1193	rs498266	A	G	A	G	M01644.metal.pos.txt.gz	IPF	0.0082	0.016092	0.5852	0.5602	0.0018	0.01894	6.145e-06	0.3955	7355	953873	0.00281369	20.7474
1194	rs6051643	A	G	A	G	M01644.metal.pos.txt.gz	IPF	0.0441	-0.052031	0.986	0.9711	0.0095	0.065164	3.759e-06	0.4246	7355	903869	0.0029213	21.5433
1195	rs630782	T	C	T	C	M01644.metal.pos.txt.gz	IPF	0.0093	-0.011784	0.4713	0.4635	0.0018	0.018718	2.324e-07	0.529	7355	953873	0.0036163	26.6872
1196	rs676094	A	G	A	G	M01644.metal.pos.txt.gz	IPF	0.0191	0.010714	0.4178	0.4142	0.0042	0.018992	6.606e-06	0.5727	1766	953873	0.011575	20.6574
1197	rs8079173	A	G	A	G	M01644.metal.pos.txt.gz	IPF	0.0118	0.029267	0.1402	0.1652	0.0026	0.025679	8.927e-06	0.2544	7355	953873	0.00279267	20.592
1198	rs9607028	T	G	T	G	M01644.metal.pos.txt.gz	IPF	-0.0084	0.033699	0.4268	0.413	0.0019	0.020325	7.286e-06	0.09733	7355	903869	0.00265043	19.5404
1199	rs989248	A	G	A	G	M01644.metal.pos.txt.gz	IPF	-0.0085	0.0035416	0.6475	0.6784	0.0018	0.019822	2.962e-06	0.8582	7355	953873	0.0030227	22.2933
1200	rs990054	T	C	T	C	M01644.metal.pos.txt.gz	IPF	-0.0087	0.02229	0.5955	0.6068	0.0018	0.020529	1.325e-06	0.2776	7355	903869	0.00316617	23.3548
1201	rs9997602	A	C	A	C	M01644.metal.pos.txt.gz	IPF	-0.0081	-0.024207	0.5717	0.5481	0.0018	0.020492	7.565e-06	0.2375	7355	903869	0.00274567	20.2445
1207	rs11036901	A	G	A	G	M01645.metal.pos.txt.gz	IPF	-0.0079	-0.025787	0.433	0.3454	0.0018	0.019601	7.855e-06	0.1883	7346	953873	0.0026153	19.2571
1208	rs11193635	T	C	T	C	M01645.metal.pos.txt.gz	IPF	0.0084	-0.022053	0.6725	0.6885	0.0018	0.021668	3.797e-06	0.3088	7346	903869	0.00295581	21.7718
1209	rs11589855	T	C	T	C	M01645.metal.pos.txt.gz	IPF	-0.0084	0.00050108	0.3809	0.4008	0.0018	0.019212	2.222e-06	0.9792	7346	953873	0.00295581	21.7718
1210	rs11731117	A	G	A	G	M01645.metal.pos.txt.gz	IPF	0.0081	0.015657	0.5958	0.5957	0.0018	0.018929	4.324e-06	0.4082	7346	953873	0.00274902	20.2445
1211	rs12940605	A	C	A	C	M01645.metal.pos.txt.gz	IPF	-0.0096	0.029127	0.6059	0.6251	0.0018	0.020823	1.823e-07	0.1619	7346	903869	0.00385716	28.4367
1212	rs13393013	A	G	A	G	M01645.metal.pos.txt.gz	IPF	0.0314	0.048228	0.0213	0.03179	0.0065	0.053536	1.312e-06	0.3677	7346	953873	0.00316668	23.33
1213	rs1487052	T	C	T	C	M01645.metal.pos.txt.gz	IPF	0.008	-0.0024145	0.3063	0.3098	0.0018	0.020206	7.664e-06	0.9049	7346	953873	0.00268175	19.7477
1214	rs1530439	T	G	T	G	M01645.metal.pos.txt.gz	IPF	0.009	0.0027356	0.2946	0.298	0.0018	0.02197	6.08e-07	0.9009	7346	903869	0.00339167	24.9932
1215	rs16942446	A	G	A	G	M01645.metal.pos.txt.gz	IPF	-0.0259	0.041	0.0314	0.03461	0.0056	0.050512	3.318e-06	0.417	7346	953873	0.00290342	21.3848
1216	rs16990450	T	C	T	C	M01645.metal.pos.txt.gz	IPF	0.0161	0.069769	0.0722	0.08493	0.0035	0.034197	4.178e-06	0.04133	7346	953873	0.00287221	21.1542
1217	rs2069151	A	G	A	G	M01645.metal.pos.txt.gz	IPF	0.009	0.021325	0.7083	0.7177	0.0018	0.020628	4.682e-07	0.3012	7346	953873	0.00339167	24.9932
1218	rs2140495	T	C	T	C	M01645.metal.pos.txt.gz	IPF	0.0638	-0.09361	0.0158	0.02678	0.0144	0.061387	9.505e-06	0.1273	1767	953873	0.0109871	19.6076
1219	rs2304767	A	G	A	G	M01645.metal.pos.txt.gz	IPF	0.0091	-0.018259	0.3402	0.3295	0.0019	0.021459	1.216e-06	0.3948	7346	903869	0.00311294	22.9328
1220	rs2423542	A	G	A	G	M01645.metal.pos.txt.gz	IPF	0.0153	-0.020494	0.8036	0.7858	0.0032	0.026384	1.914e-06	0.4373	7346	903869	0.00310229	22.8541
1221	rs2491274	A	G	A	G	M01645.metal.pos.txt.gz	IPF	-0.0297	0.0041713	0.9732	0.9648	0.0065	0.059619	4.627e-06	0.9442	7346	887228	0.00283402	20.8722
1222	rs287276	A	G	A	G	M01645.metal.pos.txt.gz	IPF	0.0084	-0.010072	0.3317	0.359	0.0018	0.021032	2.647e-06	0.632	7346	903869	0.00295581	21.7718
1223	rs369895	A	G	A	G	M01645.metal.pos.txt.gz	IPF	-0.0114	-0.015818	0.574	0.5267	0.0023	0.020422	1.075e-06	0.4386	7346	903869	0.00333314	24.5604
1224	rs4327548	A	G	A	G	M01645.metal.pos.txt.gz	IPF	-0.0093	0.034013	0.2904	0.2921	0.0018	0.020464	2.156e-07	0.0965	7346	953873	0.00362072	26.6872
1225	rs4333677	A	G	A	G	M01645.metal.pos.txt.gz	IPF	0.008	0.012078	0.5848	0.5881	0.0018	0.018913	5.985e-06	0.5231	7346	953873	0.00268175	19.7477
1226	rs4680878	T	G	T	G	M01645.metal.pos.txt.gz	IPF	0.0079	-0.018479	0.6552	0.633	0.0018	0.019508	9.163e-06	0.3435	7346	953873	0.0026153	19.2571
1227	rs4789698	T	C	T	C	M01645.metal.pos.txt.gz	IPF	-0.0079	-0.033809	0.4508	0.4408	0.0018	0.020273	6.828e-06	0.09538	7346	903869	0.0026153	19.2571
1228	rs4930046	A	G	A	G	M01645.metal.pos.txt.gz	IPF	0.0088	-0.01947	0.4652	0.4882	0.0019	0.018799	2.716e-06	0.3004	7346	953873	0.00291166	21.4457
1229	rs6441206	A	G	A	G	M01645.metal.pos.txt.gz	IPF	0.0099	0.012399	0.4638	0.4702	0.0018	0.01862	2.088e-08	0.5055	7346	953873	0.004101	30.2418
1230	rs696979	T	C	T	C	M01645.metal.pos.txt.gz	IPF	0.0084	0.0095298	0.6026	0.6154	0.0018	0.0192	2.048e-06	0.6197	7346	953873	0.00295581	21.7718
1231	rs7011528	A	C	A	C	M01645.metal.pos.txt.gz	IPF	-0.0082	0.058796	0.4515	0.4398	0.0018	0.018764	4.005e-06	0.001728	7346	953873	0.00281713	20.7474
1232	rs853907	T	C	T	C	M01645.metal.pos.txt.gz	IPF	0.0079	-0.031052	0.4778	0.4191	0.0018	0.020665	7.637e-06	0.1329	7346	903869	0.0026153	19.2571
1233	rs891531	T	G	T	G	M01645.metal.pos.txt.gz	IPF	0.0113	-0.013324	0.1846	0.2481	0.0024	0.02556	3.809e-06	0.6022	7346	887228	0.00300867	22.1624
1234	rs9563502	A	G	A	G	M01645.metal.pos.txt.gz	IPF	-0.01	0.0018826	0.7115	0.6754	0.0018	0.020404	2.56e-08	0.9265	7346	953873	0.00418392	30.8558
1235	rs9852606	C	G	C	G	M01645.metal.pos.txt.gz	IPF	-0.0085	-0.022143	0.3771	0.3747	0.0018	0.02074	1.476e-06	0.2857	7346	903869	0.00302639	22.2933
1241	rs10050054	T	C	T	C	M01649.metal.pos.txt.gz	IPF	-0.0336	0.026937	0.9828	0.9861	0.0072	0.083137	3.177e-06	0.7459	1763	937232	0.012202	21.7531
1242	rs10181551	A	G	A	G	M01649.metal.pos.txt.gz	IPF	-0.0055	-0.0044253	0.296	0.2969	0.0012	0.02051	3.876e-06	0.8292	7359	953873	0.00284647	21.0012
1243	rs12552913	A	T	A	T	M01649.metal.pos.txt.gz	IPF	-0.0059	-0.030725	0.2932	0.3172	0.0012	0.020378	1.164e-06	0.1316	7359	953873	0.00327415	24.167
1244	rs2373642	A	G	A	G	M01649.metal.pos.txt.gz	IPF	-0.054	-0.044865	0.0138	0.03453	0.011	0.061023	9.775e-07	0.4622	1763	885936	0.0134851	24.0718
1245	rs3762466	T	C	T	C	M01649.metal.pos.txt.gz	IPF	0.0058	0.027357	0.6819	0.6754	0.0012	0.019872	1.063e-06	0.1686	7359	953873	0.00316445	23.3548
1251	rs10075187	T	G	T	G	M01670.metal.pos.txt.gz	IPF	0.0316	0.011003	0.9687	0.96773	0.0068	0.055345	3.438e-06	0.8424	7348	755859	0.0029303	21.5893
1252	rs12654812	A	G	A	G	M01670.metal.pos.txt.gz	IPF	0.0118	0.058176	0.2913	0.3512	0.0025	0.019444	3.362e-06	0.002772	7348	953873	0.00302274	22.2723
1253	rs1569823	T	C	T	C	M01670.metal.pos.txt.gz	IPF	-0.0152	-0.044476	0.8757	0.8749	0.0034	0.030201	8.248e-06	0.1408	7348	903869	0.00271257	19.9807
1254	rs2170700	A	G	A	G	M01670.metal.pos.txt.gz	IPF	0.0326	0.034011	0.8663	0.9006	0.0069	0.036531	2.431e-06	0.3518	1761	887228	0.0125172	22.2968
1255	rs2424200	T	C	T	C	M01670.metal.pos.txt.gz	IPF	0.0152	-0.014623	0.1163	0.1151	0.0034	0.029238	6.428e-06	0.617	7348	953873	0.00271257	19.9807
1256	rs6074893	A	C	A	C	M01670.metal.pos.txt.gz	IPF	-0.0115	-0.013137	0.7512	0.7485	0.0026	0.021719	8.524e-06	0.5453	7348	953873	0.00265537	19.5583
1257	rs9646626	T	C	T	C	M01670.metal.pos.txt.gz	IPF	-0.0226	-0.083589	0.948	0.94517	0.0051	0.040242	7.979e-06	0.03779	7348	953873	0.00266531	19.6317
1258	rs980922	C	G	C	G	M01670.metal.pos.txt.gz	IPF	-0.012	-0.02403	0.8056	0.7684	0.0026	0.022353	3.569e-06	0.2824	7348	953873	0.00289061	21.296
1264	rs1010874	A	G	A	G	M01712.metal.pos.txt.gz	IPF	-0.0491	0.020702	0.0629	0.05212	0.0096	0.042426	3.169e-07	0.6256	1753	953873	0.014703	26.1291
1265	rs11013837	A	T	A	T	M01712.metal.pos.txt.gz	IPF	-0.015	0.0073522	0.2463	0.2285	0.0034	0.022095	8.163e-06	0.7393	7346	953873	0.00264256	19.4584
1266	rs11855136	A	G	A	G	M01712.metal.pos.txt.gz	IPF	-0.0618	0.030519	0.0406	0.04306	0.0121	0.055401	2.991e-07	0.5817	1753	887228	0.0146625	26.0562
1267	rs11987983	T	C	T	C	M01712.metal.pos.txt.gz	IPF	-0.0457	0.0022124	0.099	0.06217	0.0102	0.037111	7.164e-06	0.9525	1753	953873	0.0113215	20.051
1268	rs12210538	A	G	A	G	M01712.metal.pos.txt.gz	IPF	0.0254	-0.0042766	0.8442	0.7899	0.0057	0.024026	9.185e-06	0.8587	7346	903869	0.00269584	19.8518
1269	rs12883490	T	C	T	C	M01712.metal.pos.txt.gz	IPF	0.0166	0.0078445	0.6656	0.6313	0.0033	0.021136	3.756e-07	0.7105	7346	903869	0.00343276	25.2971
1270	rs1381274	T	C	T	C	M01712.metal.pos.txt.gz	IPF	-0.0146	0.012474	0.4672	0.4723	0.0032	0.018709	3.625e-06	0.505	7346	953873	0.0028257	20.8107
1271	rs1491606	A	T	A	T	M01712.metal.pos.txt.gz	IPF	0.0182	0.023787	0.2992	0.3444	0.004	0.021092	5.796e-06	0.2594	7346	903869	0.00281028	20.6969
1272	rs4439706	T	C	T	C	M01712.metal.pos.txt.gz	IPF	0.0151	0.025702	0.7156	0.7273	0.0033	0.020758	3.775e-06	0.2157	7346	953873	0.0028421	20.9319
1273	rs9446392	T	C	T	C	M01712.metal.pos.txt.gz	IPF	-0.0331	-0.039547	0.9533	0.95331	0.0075	0.043609	9.272e-06	0.3645	7346	953873	0.00264443	19.4722
1274	rs9533798	C	G	C	G	M01712.metal.pos.txt.gz	IPF	-0.0142	0.0026801	0.3667	0.367	0.0032	0.019359	8.363e-06	0.8899	7346	953873	0.0026734	19.686
1280	rs10454657	T	C	T	C	M01769.metal.pos.txt.gz	IPF	0.0083	-0.013921	0.5849	0.5791	0.0017	0.020084	1.637e-06	0.4882	7136	937232	0.00332932	23.8307
1281	rs10824300	A	G	A	G	M01769.metal.pos.txt.gz	IPF	0.009	-0.0039924	0.383	0.403	0.002	0.019081	6.795e-06	0.8343	5422	953873	0.00372089	20.2425
1282	rs10851734	A	G	A	G	M01769.metal.pos.txt.gz	IPF	0.0078	-0.012972	0.6345	0.6453	0.0017	0.019618	6.048e-06	0.5085	7136	953873	0.00294142	21.046
1283	rs10938815	T	G	T	G	M01769.metal.pos.txt.gz	IPF	0.0099	-0.001444	0.5932	0.5834	0.0017	0.018933	8.381e-09	0.9392	7136	953873	0.00472997	33.904
1284	rs11532668	A	G	A	G	M01769.metal.pos.txt.gz	IPF	0.0168	0.039732	0.8339	0.7885	0.0038	0.025595	9.746e-06	0.1206	7136	903869	0.00273155	19.5402
1285	rs1173830	T	C	T	C	M01769.metal.pos.txt.gz	IPF	-0.0171	0.03487	0.6542	0.6416	0.0034	0.020902	6.602e-07	0.09525	1714	903869	0.0145432	25.2655
1286	rs13280205	A	C	A	C	M01769.metal.pos.txt.gz	IPF	0.0121	-0.0093201	0.805	0.7043	0.0025	0.022247	2.015e-06	0.6753	7136	903869	0.00327199	23.419
1287	rs1438564	T	C	T	C	M01769.metal.pos.txt.gz	IPF	0.0114	0.010762	0.8089	0.7929	0.0025	0.023931	5.103e-06	0.6529	7136	819655	0.00290544	20.7878
1288	rs17248331	T	C	T	C	M01769.metal.pos.txt.gz	IPF	-0.0089	-0.0093048	0.5848	0.5724	0.0017	0.020237	1.699e-07	0.6457	7136	903869	0.00382615	27.4006
1289	rs2118096	A	C	A	C	M01769.metal.pos.txt.gz	IPF	0.0084	-0.040806	0.6068	0.641	0.0017	0.020823	1.133e-06	0.05004	7136	903869	0.00340975	24.4084
1290	rs219918	C	G	C	G	M01769.metal.pos.txt.gz	IPF	-0.0299	0.083405	0.0224	0.0239	0.0063	0.064815	2.477e-06	0.1982	7136	937232	0.00314657	22.5185
1291	rs2272663	A	G	A	G	M01769.metal.pos.txt.gz	IPF	0.0077	0.040429	0.5321	0.5192	0.0017	0.020154	9.389e-06	0.04486	7136	903869	0.0028667	20.5098
1292	rs2325727	T	C	T	C	M01769.metal.pos.txt.gz	IPF	-0.0076	-0.0014401	0.4423	0.4355	0.0017	0.018857	9.34e-06	0.9391	7136	953873	0.00279293	19.9806
1293	rs2351174	T	G	T	G	M01769.metal.pos.txt.gz	IPF	-0.0081	-0.0022014	0.6063	0.6486	0.0017	0.019391	2.628e-06	0.9096	7136	953873	0.0031713	22.6961
1294	rs4470135	A	C	A	C	M01769.metal.pos.txt.gz	IPF	0.0088	0.0098391	0.5203	0.532	0.0018	0.018768	5.174e-07	0.6001	7136	953873	0.00333821	23.8945
1295	rs4653629	T	C	T	C	M01769.metal.pos.txt.gz	IPF	-0.0084	0.030568	0.5584	0.5689	0.0017	0.018832	1.249e-06	0.1045	7136	953873	0.00340975	24.4084
1296	rs527793	T	G	T	G	M01769.metal.pos.txt.gz	IPF	-0.0149	0.044561	0.1085	0.1304	0.0033	0.028343	4.668e-06	0.1159	7136	819655	0.00284873	20.3809
1297	rs6017596	T	C	T	C	M01769.metal.pos.txt.gz	IPF	-0.0084	-0.024766	0.5825	0.5454	0.0017	0.02029	8.308e-07	0.2222	7136	903869	0.00340975	24.4084
1298	rs6539409	T	G	T	G	M01769.metal.pos.txt.gz	IPF	-0.0078	0.025331	0.5663	0.5963	0.0017	0.019	4.953e-06	0.1825	7136	953873	0.00294142	21.046
1299	rs7562418	A	C	A	C	M01769.metal.pos.txt.gz	IPF	0.0077	0.0017857	0.5075	0.5128	0.0017	0.018712	6.809e-06	0.924	7136	953873	0.0028667	20.5098
1300	rs7670890	A	G	A	G	M01769.metal.pos.txt.gz	IPF	-0.0076	0.016368	0.6344	0.6525	0.0017	0.01949	9.639e-06	0.401	7136	953873	0.00279293	19.9806
1301	rs7814638	A	G	A	G	M01769.metal.pos.txt.gz	IPF	-0.0133	-0.034082	0.141	0.1199	0.0025	0.03041	1.231e-07	0.2624	7136	903869	0.00395048	28.2945
1302	rs7837792	T	C	T	C	M01769.metal.pos.txt.gz	IPF	-0.0081	-0.028082	0.5936	0.6026	0.0017	0.02072	2.782e-06	0.1753	7136	903869	0.0031713	22.6961
1303	rs7915877	T	C	T	C	M01769.metal.pos.txt.gz	IPF	-0.0078	0.0057675	0.5509	0.5662	0.0017	0.020382	4.416e-06	0.7772	7136	903869	0.00294142	21.046
1304	rs9391679	A	C	A	C	M01769.metal.pos.txt.gz	IPF	0.0123	-0.036691	0.157	0.1763	0.0025	0.025731	5.815e-07	0.1539	7136	888793	0.00338068	24.1996
1305	rs940511	A	G	A	G	M01769.metal.pos.txt.gz	IPF	-0.0077	0.013527	0.4652	0.4737	0.0017	0.020083	6.713e-06	0.5006	7136	903869	0.0028667	20.5098
1306	rs960381	A	C	A	C	M01769.metal.pos.txt.gz	IPF	0.008	0.0073676	0.5958	0.6108	0.0017	0.019057	3.559e-06	0.6991	7136	953873	0.00309372	22.1391
1307	rs9674799	A	G	A	G	M01769.metal.pos.txt.gz	IPF	0.0157	-0.013613	0.8784	0.8416	0.0032	0.028639	7.465e-07	0.6346	7136	903869	0.00336188	24.0645
1313	rs10183099	A	G	A	G	M01898.metal.pos.txt.gz	IPF	-0.0084	-0.0059284	0.6391	0.613	0.0018	0.020733	2.443e-06	0.7749	7367	903869	0.00294741	21.7719
1314	rs10501294	T	C	T	C	M01898.metal.pos.txt.gz	IPF	-0.0124	0.015235	0.8715	0.8684	0.0027	0.027724	3.11e-06	0.5826	7367	953873	0.00285485	21.0862
1315	rs10512634	A	G	A	G	M01898.metal.pos.txt.gz	IPF	0.0117	-0.0082529	0.1405	0.1316	0.0026	0.027694	8.593e-06	0.7657	7367	953873	0.00274121	20.2445
1316	rs10747856	A	G	A	G	M01898.metal.pos.txt.gz	IPF	-0.0079	-0.0040918	0.5243	0.5239	0.0017	0.018695	6.032e-06	0.8267	7367	953873	0.00292277	21.5893
1317	rs11075967	T	C	T	C	M01898.metal.pos.txt.gz	IPF	-0.0087	-0.0012859	0.6699	0.6512	0.0018	0.019791	8.671e-07	0.9482	7367	953873	0.00316102	23.3548
1318	rs11183620	A	G	A	G	M01898.metal.pos.txt.gz	IPF	0.0082	0.031798	0.4679	0.4342	0.0017	0.020054	2.343e-06	0.1128	7367	937232	0.00314825	23.2601
1319	rs11802885	A	T	A	T	M01898.metal.pos.txt.gz	IPF	0.0098	0.035203	0.3634	0.3784	0.0018	0.019301	2.327e-08	0.06817	7367	953873	0.00400749	29.6339
1320	rs11848063	A	G	A	G	M01898.metal.pos.txt.gz	IPF	0.0087	0.0053588	0.5861	0.6036	0.0018	0.020666	7.138e-07	0.7954	7367	903869	0.00316102	23.3548
1321	rs1394836	T	C	T	C	M01898.metal.pos.txt.gz	IPF	0.0083	0.013156	0.6032	0.5969	0.0018	0.019091	2.227e-06	0.4908	7367	953873	0.00287785	21.2566
1322	rs175866	T	G	T	G	M01898.metal.pos.txt.gz	IPF	-0.0086	-0.0014078	0.5784	0.599	0.0018	0.020553	1.139e-06	0.9454	7367	903869	0.003089	22.821
1323	rs17742907	A	G	A	G	M01898.metal.pos.txt.gz	IPF	0.0174	-0.043548	0.0765	0.08085	0.0039	0.049484	9.574e-06	0.3788	7367	623180	0.00269468	19.8999
1324	rs1888182	T	C	T	C	M01898.metal.pos.txt.gz	IPF	0.0079	-0.0058181	0.4159	0.4184	0.0018	0.018952	7.927e-06	0.7589	7367	953873	0.00260786	19.2571
1325	rs2185865	A	C	A	C	M01898.metal.pos.txt.gz	IPF	0.0177	0.01937	0.9245	0.92467	0.0034	0.036208	1.698e-07	0.5927	7367	953873	0.00366525	27.0939
1326	rs2518802	A	C	A	C	M01898.metal.pos.txt.gz	IPF	-0.0534	-0.036021	0.903	0.9049	0.0033	0.034344	4.152e-59	0.2943	7367	903869	0.0343238	261.78
1327	rs2935623	A	G	A	G	M01898.metal.pos.txt.gz	IPF	-0.0079	-0.00073504	0.6235	0.5943	0.0018	0.019249	8.71e-06	0.9695	7367	953873	0.00260786	19.2571
1328	rs4580644	T	C	T	C	M01898.metal.pos.txt.gz	IPF	0.0157	0.0030464	0.4937	0.4893	0.0035	0.018677	8.163e-06	0.8704	1766	953873	0.0112655	20.0988
1329	rs4978836	A	G	A	G	M01898.metal.pos.txt.gz	IPF	0.009	-0.016327	0.391	0.3886	0.002	0.019186	6.795e-06	0.3948	5601	953873	0.0036024	20.2428
1330	rs535633	A	G	A	G	M01898.metal.pos.txt.gz	IPF	-0.0086	-0.011637	0.5847	0.5911	0.0018	0.02048	1.049e-06	0.5699	7367	903869	0.003089	22.821
1331	rs5747934	T	C	T	C	M01898.metal.pos.txt.gz	IPF	0.0715	0.041636	0.0468	0.03834	0.0051	0.054274	1.997e-44	0.443	7367	689825	0.0259864	196.496
1332	rs6085132	T	C	T	C	M01898.metal.pos.txt.gz	IPF	-0.0272	0.033091	0.9725	0.96338	0.0059	0.05285	4.011e-06	0.5312	7367	903869	0.00287668	21.2479
1333	rs7029664	T	C	T	C	M01898.metal.pos.txt.gz	IPF	0.0077	-0.0020851	0.5057	0.4993	0.0017	0.022463	9.66e-06	0.926	7367	887228	0.00277706	20.51
1334	rs7208186	T	C	T	C	M01898.metal.pos.txt.gz	IPF	0.0139	0.0015992	0.8619	0.8423	0.0026	0.025682	6.262e-08	0.9503	7367	953873	0.00386465	28.5736
1335	rs893175	A	C	A	C	M01898.metal.pos.txt.gz	IPF	-0.0086	0.021771	0.5884	0.5963	0.0018	0.020725	1.527e-06	0.2935	7367	903869	0.003089	22.821
1336	rs9540462	T	G	T	G	M01898.metal.pos.txt.gz	IPF	-0.012	-0.0085897	0.8756	0.8628	0.0026	0.027425	4.797e-06	0.7541	7367	953873	0.00288318	21.296
1342	rs10164524	A	G	A	G	M02132.metal.pos.txt.gz	IPF	-0.01	0.01196	0.6775	0.6712	0.0017	0.019818	1.059e-08	0.5462	7325	953873	0.00470162	34.5926
1343	rs10234187	T	C	T	C	M02132.metal.pos.txt.gz	IPF	0.0085	0.0074582	0.3185	0.3263	0.0017	0.019843	1.074e-06	0.707	7325	953873	0.00340136	24.9932
1344	rs10858075	T	C	T	C	M02132.metal.pos.txt.gz	IPF	-0.0091	0.0004613	0.4061	0.3802	0.0017	0.020717	1.124e-07	0.9822	7325	903869	0.00389656	28.6462
1345	rs10901047	T	C	T	C	M02132.metal.pos.txt.gz	IPF	-0.009	0.012254	0.5877	0.5747	0.0018	0.020511	2.964e-07	0.5502	7325	903869	0.00340136	24.9932
1346	rs11119951	T	C	T	C	M02132.metal.pos.txt.gz	IPF	0.0119	-0.006624	0.1175	0.1314	0.0026	0.028446	4.358e-06	0.8159	7325	953873	0.00285167	20.9425
1347	rs11993007	A	G	A	G	M02132.metal.pos.txt.gz	IPF	-0.0127	0.027078	0.3167	0.3346	0.0028	0.022838	5.239e-06	0.2358	7325	887228	0.00280069	20.5671
1348	rs12701265	A	G	A	G	M02132.metal.pos.txt.gz	IPF	0.0086	-0.038209	0.3919	0.3934	0.0017	0.019116	7.372e-07	0.04563	7325	953873	0.00348158	25.5847
1349	rs13105113	A	C	A	C	M02132.metal.pos.txt.gz	IPF	0.0114	-0.018375	0.8769	0.8642	0.0026	0.027729	9.176e-06	0.5075	7325	953873	0.00261768	19.2196
1350	rs1509820	A	G	A	G	M02132.metal.pos.txt.gz	IPF	0.0096	0.015133	0.5299	0.5307	0.0017	0.018732	1.749e-08	0.4191	7325	953873	0.00433461	31.8806
1351	rs1511589	A	G	A	G	M02132.metal.pos.txt.gz	IPF	0.0077	0.019945	0.4559	0.4002	0.0017	0.01903	7.553e-06	0.2946	7325	953873	0.00279294	20.51
1352	rs1610360	A	T	A	T	M02132.metal.pos.txt.gz	IPF	0.008	0.03872	0.6678	0.686	0.0018	0.01997	4.628e-06	0.05251	7325	953873	0.00268941	19.7477
1353	rs16841570	T	C	T	C	M02132.metal.pos.txt.gz	IPF	0.0248	-0.0011249	0.9726	0.9501	0.0056	0.044095	8.589e-06	0.9796	7325	953873	0.00267029	19.6069
1354	rs17142889	T	G	T	G	M02132.metal.pos.txt.gz	IPF	0.0111	0.0038162	0.1339	0.1337	0.0025	0.029375	9.909e-06	0.8966	7325	903869	0.00268405	19.7082
1355	rs17821771	T	G	T	G	M02132.metal.pos.txt.gz	IPF	-0.0082	-0.033389	0.3485	0.3173	0.0017	0.020085	1.917e-06	0.09642	7325	953873	0.00316625	23.2601
1356	rs1920325	T	C	T	C	M02132.metal.pos.txt.gz	IPF	-0.0081	-0.015806	0.6425	0.6403	0.0017	0.019405	3.658e-06	0.4153	7325	953873	0.00308973	22.6962
1357	rs1935815	A	T	A	T	M02132.metal.pos.txt.gz	IPF	0.0111	-0.014258	0.3513	0.3381	0.0017	0.019785	1.548e-10	0.4711	7325	953873	0.00578656	42.6216
1358	rs229084	A	G	A	G	M02132.metal.pos.txt.gz	IPF	-0.0077	0.0052196	0.4727	0.4992	0.0017	0.018747	6.574e-06	0.7807	7325	953873	0.00279294	20.51
1359	rs2350885	A	T	A	T	M02132.metal.pos.txt.gz	IPF	-0.0079	-0.015327	0.3481	0.3379	0.0018	0.019651	8.717e-06	0.4354	7325	953873	0.00262277	19.2571
1360	rs2487410	T	C	T	C	M02132.metal.pos.txt.gz	IPF	-0.0081	0.0064136	0.4696	0.4816	0.0017	0.01873	1.841e-06	0.732	7325	953873	0.00308973	22.6962
1361	rs2506864	T	G	T	G	M02132.metal.pos.txt.gz	IPF	-0.0076	0.016248	0.4103	0.4306	0.0017	0.018945	8.81e-06	0.3911	7325	953873	0.00272106	19.9807
1362	rs310101	A	G	A	G	M02132.metal.pos.txt.gz	IPF	0.0367	0.0035666	0.9579	0.9423	0.0079	0.043743	3.86e-06	0.935	1753	882012	0.0121614	21.5567
1363	rs539904	A	G	A	G	M02132.metal.pos.txt.gz	IPF	-0.0086	-0.0067584	0.7056	0.7001	0.0018	0.020423	1.507e-06	0.7407	7325	953873	0.00310665	22.8209
1364	rs6040877	A	G	A	G	M02132.metal.pos.txt.gz	IPF	-0.0081	0.012367	0.2715	0.2955	0.0018	0.020695	4.01e-06	0.5501	7325	953873	0.00275688	20.2445
1365	rs6510448	T	G	T	G	M02132.metal.pos.txt.gz	IPF	0.0077	-0.021867	0.6691	0.6518	0.0017	0.028864	8.14e-06	0.4487	7325	623180	0.00279294	20.51
1366	rs682103	T	C	T	C	M02132.metal.pos.txt.gz	IPF	-0.0097	-0.0097004	0.7055	0.7014	0.0018	0.020458	4.257e-08	0.6354	7325	953873	0.00394887	29.0322
1367	rs6889120	T	C	T	C	M02132.metal.pos.txt.gz	IPF	-0.034	0.026793	0.9378	0.94185	0.0076	0.046944	7.436e-06	0.5682	1753	885936	0.011288	19.991
1368	rs6994363	A	G	A	G	M02132.metal.pos.txt.gz	IPF	-0.0121	0.020004	0.8662	0.8737	0.0026	0.029301	2.495e-06	0.4948	7325	903869	0.00294805	21.6524
1369	rs758186	T	C	T	C	M02132.metal.pos.txt.gz	IPF	-0.0077	0.014739	0.6536	0.6317	0.0017	0.020966	8.687e-06	0.4821	7325	903869	0.00279294	20.51
1370	rs7597477	A	G	A	G	M02132.metal.pos.txt.gz	IPF	-0.0155	-0.014197	0.9327	0.9423	0.0034	0.039521	6.797e-06	0.7194	7325	953873	0.00282922	20.7772
1371	rs7615965	T	C	T	C	M02132.metal.pos.txt.gz	IPF	0.0086	0.013627	0.7121	0.7209	0.0019	0.022295	4.149e-06	0.5411	7325	903869	0.00278913	20.4819
1372	rs8021336	A	G	A	G	M02132.metal.pos.txt.gz	IPF	-0.0086	0.041148	0.313	0.3197	0.0018	0.020145	9.887e-07	0.04109	7325	953873	0.00310665	22.8209
1373	rs8033140	T	C	T	C	M02132.metal.pos.txt.gz	IPF	0.008	-0.00087497	0.3547	0.3436	0.0017	0.019744	4.323e-06	0.9647	7325	953873	0.00301414	22.1393
1374	rs9354336	T	C	T	C	M02132.metal.pos.txt.gz	IPF	0.0113	-0.009348	0.8733	0.8667	0.0025	0.02733	8.569e-06	0.7323	7325	953873	0.00278138	20.4248
1380	rs1019595	T	C	T	C	M02137.metal.pos.txt.gz	IPF	-0.0345	-0.061886	0.9326	0.94143	0.0076	0.041748	5.463e-06	0.1382	6252	937232	0.00328521	20.6002
1381	rs12371604	T	C	T	C	M02137.metal.pos.txt.gz	IPF	-0.0205	0.026779	0.7709	0.7374	0.0043	0.021691	2.18e-06	0.217	6252	953873	0.00362223	22.7212
1382	rs12496969	A	G	A	G	M02137.metal.pos.txt.gz	IPF	0.0202	-0.038312	0.7844	0.7556	0.0044	0.022302	4.279e-06	0.08582	6252	953873	0.00335983	21.0697
1383	rs1891053	A	G	A	G	M02137.metal.pos.txt.gz	IPF	0.1831	-0.073778	0.0145	0.0102	0.0371	0.10128	8.028e-07	0.4663	1175	937232	0.0203086	24.3158
1384	rs2760277	A	G	A	G	M02137.metal.pos.txt.gz	IPF	0.0197	0.00093727	0.7946	0.828	0.0044	0.024262	8.256e-06	0.9692	6252	953873	0.00319608	20.0396
1385	rs280194	T	C	T	C	M02137.metal.pos.txt.gz	IPF	-0.0197	0.010345	0.7311	0.7238	0.0043	0.022468	5.766e-06	0.6452	6252	903869	0.00334596	20.9825
1386	rs4944238	A	G	A	G	M02137.metal.pos.txt.gz	IPF	-0.0241	0.0062937	0.8712	0.862	0.0053	0.027176	4.882e-06	0.8169	6252	953873	0.00329632	20.6701
1387	rs4964090	A	G	A	G	M02137.metal.pos.txt.gz	IPF	-0.019	0.0060846	0.5654	0.5706	0.0036	0.023234	1.176e-07	0.7934	6252	571637	0.0044356	27.846
1388	rs6503066	T	C	T	C	M02137.metal.pos.txt.gz	IPF	0.0317	0.02177	0.0984	0.096	0.0065	0.033835	9.488e-07	0.52	6252	937232	0.00378987	23.7768
1389	rs6759896	A	G	A	G	M02137.metal.pos.txt.gz	IPF	-0.0166	0.024359	0.5913	0.5549	0.0036	0.020288	4.888e-06	0.2299	6252	903869	0.00338936	21.2555
1390	rs6823453	A	G	A	G	M02137.metal.pos.txt.gz	IPF	0.0231	0.032515	0.2233	0.2202	0.0044	0.024	1.781e-07	0.1755	6252	903869	0.00438924	27.5537
1391	rs6837370	A	G	A	G	M02137.metal.pos.txt.gz	IPF	0.0645	0.039033	0.1004	0.1039	0.0122	0.037081	1.149e-07	0.2925	1175	705855	0.0232355	27.9036
1392	rs887829	T	C	T	C	M02137.metal.pos.txt.gz	IPF	0.1131	-0.011007	0.3411	0.3377	0.0041	0.019724	2.5e-168	0.5768	6252	953873	0.108507	760.709
1398	rs10516056	T	C	T	C	M02342.metal.pos.txt.gz	IPF	-0.0222	-0.010532	0.1978	0.2077	0.0045	0.025425	6.992e-07	0.6787	5791	903869	0.0041851	24.3294
1399	rs10953038	T	C	T	C	M02342.metal.pos.txt.gz	IPF	0.022	-0.0042234	0.8497	0.8329	0.0048	0.025347	4.116e-06	0.8677	5791	953873	0.0036144	20.9997
1400	rs12646122	T	C	T	C	M02342.metal.pos.txt.gz	IPF	-0.0497	0.059526	0.0308	0.03887	0.0104	0.05171	1.802e-06	0.2497	5791	953873	0.00392811	22.8295
1401	rs17708932	A	G	A	G	M02342.metal.pos.txt.gz	IPF	-0.0766	0.090027	0.0376	0.05749	0.0171	0.041074	7.215e-06	0.02839	1741	953873	0.0113944	20.0432
1402	rs2742351	C	G	C	G	M02342.metal.pos.txt.gz	IPF	-0.0235	0.028447	0.2209	0.243	0.0046	0.02293	3.227e-07	0.2147	5791	903869	0.00448656	26.0898
1403	rs3753556	T	C	T	C	M02342.metal.pos.txt.gz	IPF	0.015	-0.020781	0.4325	0.4298	0.0032	0.018903	3.663e-06	0.2716	5791	953873	0.00377993	21.9651
1404	rs5764174	T	C	T	C	M02342.metal.pos.txt.gz	IPF	-0.0194	0.0098281	0.2445	0.2677	0.004	0.021265	9.608e-07	0.644	5791	953873	0.00404547	23.5144
1405	rs6466265	A	G	A	G	M02342.metal.pos.txt.gz	IPF	0.0186	0.010442	0.7977	0.7892	0.004	0.023086	4.146e-06	0.6511	5791	953873	0.00371992	21.615
1406	rs7868774	A	G	A	G	M02342.metal.pos.txt.gz	IPF	-0.0188	0.026333	0.2709	0.2517	0.0039	0.021439	1.779e-06	0.2193	5791	953873	0.00399663	23.2293
1407	rs8113773	A	G	A	G	M02342.metal.pos.txt.gz	IPF	0.016	-0.040003	0.5616	0.5259	0.0033	0.01878	1.117e-06	0.03316	5791	953873	0.00404296	23.4997
1408	rs825278	T	C	T	C	M02342.metal.pos.txt.gz	IPF	-0.0913	0.023491	0.0201	0.0306	0.0192	0.067734	2.062e-06	0.7287	1741	887228	0.0128214	22.586
1409	rs988694	A	G	A	G	M02342.metal.pos.txt.gz	IPF	-0.0145	-0.025459	0.477	0.5017	0.0033	0.018633	8.39e-06	0.1718	5791	953873	0.00332284	19.3
1410	rs9953702	A	G	A	G	M02342.metal.pos.txt.gz	IPF	0.0146	-0.029032	0.3601	0.371	0.0033	0.019475	9.22e-06	0.136	5791	953873	0.00336867	19.5672
1416	rs10432570	A	G	A	G	M02730.metal.pos.txt.gz	IPF	0.0738	0.031101	0.0145	0.03522	0.0138	0.057401	9.502e-08	0.5879	1766	903869	0.0159363	28.5669
1417	rs10497174	T	C	T	C	M02730.metal.pos.txt.gz	IPF	0.0103	0.0028597	0.2732	0.2709	0.0022	0.021052	4.162e-06	0.892	7226	953873	0.00302424	21.9134
1418	rs11151406	A	T	A	T	M02730.metal.pos.txt.gz	IPF	0.0301	-0.0051766	0.9444	0.945	0.0066	0.04186	5.611e-06	0.9016	1766	953873	0.0116404	20.7756
1419	rs1260326	T	C	T	C	M02730.metal.pos.txt.gz	IPF	-0.0121	-0.0030237	0.4122	0.3825	0.0021	0.019156	5.608e-09	0.8746	7226	953873	0.00457344	33.1904
1420	rs12737843	T	C	T	C	M02730.metal.pos.txt.gz	IPF	0.012	-0.040708	0.7976	0.7978	0.0023	0.026258	1.959e-07	0.1211	7226	621641	0.00375298	27.2136
1421	rs17041868	T	C	T	C	M02730.metal.pos.txt.gz	IPF	0.0196	0.055522	0.939	0.94364	0.0042	0.040206	4.018e-06	0.1673	7226	953873	0.00300475	21.7718
1422	rs1751956	T	G	T	G	M02730.metal.pos.txt.gz	IPF	0.016	-0.026683	0.8647	0.8674	0.0029	0.027379	2.353e-08	0.3298	7226	953873	0.00419489	30.4315
1423	rs17602430	T	C	T	C	M02730.metal.pos.txt.gz	IPF	0.0172	-0.023544	0.079	0.07308	0.0036	0.03561	1.574e-06	0.5085	7226	953873	0.00314908	22.8208
1424	rs1832664	T	C	T	C	M02730.metal.pos.txt.gz	IPF	-0.0097	-0.0030888	0.2818	0.3274	0.0022	0.019941	7.735e-06	0.8769	7226	953873	0.00268308	19.4347
1425	rs192598	A	C	A	C	M02730.metal.pos.txt.gz	IPF	0.0103	-0.02839	0.3185	0.295	0.0022	0.020307	1.989e-06	0.1621	7226	953873	0.00302424	21.9134
1426	rs2657879	A	G	A	G	M02730.metal.pos.txt.gz	IPF	0.0238	0.018875	0.8262	0.8198	0.0027	0.023949	5.854e-19	0.4306	7226	953873	0.0106386	77.6795
1427	rs35592	T	C	T	C	M02730.metal.pos.txt.gz	IPF	0.0107	0.0049337	0.7618	0.744	0.0022	0.021568	1.241e-06	0.8191	7226	953873	0.00326291	23.6484
1428	rs4587207	A	G	A	G	M02730.metal.pos.txt.gz	IPF	-0.0129	0.059213	0.8566	0.8524	0.0028	0.025906	3.194e-06	0.02227	7226	888793	0.00292881	21.2199
1429	rs4981468	A	G	A	G	M02730.metal.pos.txt.gz	IPF	0.0207	-0.0031806	0.0509	0.0477	0.0045	0.050895	4.761e-06	0.9502	7226	887228	0.00291976	21.1541
1430	rs6488270	A	G	A	G	M02730.metal.pos.txt.gz	IPF	0.0096	0.0021468	0.4076	0.3839	0.0021	0.019122	4.947e-06	0.9106	7226	953873	0.00288371	20.8922
1431	rs7068278	T	G	T	G	M02730.metal.pos.txt.gz	IPF	0.0116	-0.0038783	0.1968	0.2127	0.0023	0.027633	6.545e-07	0.8884	7226	705855	0.00350781	25.4296
1432	rs832404	T	C	T	C	M02730.metal.pos.txt.gz	IPF	-0.013	0.038175	0.8684	0.8703	0.0029	0.030162	7.525e-06	0.2056	7226	937232	0.00277324	20.0896
1433	rs849039	T	G	T	G	M02730.metal.pos.txt.gz	IPF	-0.0135	-0.029523	0.779	0.71	0.0028	0.022767	1.405e-06	0.1947	7226	903869	0.0032067	23.2397
1434	rs9436667	T	C	T	C	M02730.metal.pos.txt.gz	IPF	0.0135	0.027873	0.1138	0.1177	0.003	0.029122	7.3e-06	0.3385	7226	953873	0.00279455	20.2444
1440	rs10013737	A	G	A	G	M02734.metal.pos.txt.gz	IPF	0.0087	0.0005164	0.6839	0.6743	0.0018	0.019825	7.895e-07	0.9792	7037	953873	0.00330877	23.3545
1441	rs10774085	A	C	A	C	M02734.metal.pos.txt.gz	IPF	0.008	-0.037365	0.6817	0.6735	0.0018	0.019915	7.6e-06	0.06062	7037	953873	0.00279917	19.7475
1442	rs10840070	T	C	T	C	M02734.metal.pos.txt.gz	IPF	-0.0079	-0.010825	0.3602	0.3842	0.0018	0.022954	8.346e-06	0.6372	7037	705855	0.00272982	19.2569
1443	rs11165454	T	C	T	C	M02734.metal.pos.txt.gz	IPF	0.0089	-0.062355	0.5583	0.5901	0.0017	0.020369	2.786e-07	0.002204	7037	903869	0.00387977	27.4005
1444	rs11199176	A	C	A	C	M02734.metal.pos.txt.gz	IPF	0.0077	0.030164	0.5221	0.5574	0.0017	0.020261	9.328e-06	0.1365	7037	903869	0.00290691	20.5097
1445	rs12276109	T	C	T	C	M02734.metal.pos.txt.gz	IPF	-0.0084	0.00037227	0.4352	0.4078	0.0017	0.020487	1.564e-06	0.9855	7037	903869	0.00345755	24.4083
1446	rs12429206	A	G	A	G	M02734.metal.pos.txt.gz	IPF	0.0086	0.040459	0.3376	0.3599	0.0018	0.021058	1.847e-06	0.05469	7037	903869	0.00323339	22.8207
1447	rs1340971	T	C	T	C	M02734.metal.pos.txt.gz	IPF	-0.008	0.0050002	0.6654	0.6795	0.0017	0.019865	4.663e-06	0.8013	7037	953873	0.00313711	22.139
1448	rs151743	T	C	T	C	M02734.metal.pos.txt.gz	IPF	-0.009	0.025608	0.426	0.4403	0.002	0.021643	6.795e-06	0.2367	5370	903869	0.00375678	20.2425
1449	rs17558863	A	G	A	G	M02734.metal.pos.txt.gz	IPF	-0.0222	0.071277	0.955	0.9455	0.005	0.041286	8.011e-06	0.08427	7037	953873	0.0027936	19.708
1450	rs17593458	C	G	C	G	M02734.metal.pos.txt.gz	IPF	0.0144	0.02614	0.8978	0.8971	0.0032	0.032598	7.088e-06	0.4226	7037	903869	0.00286939	20.2442
1451	rs17616555	A	G	A	G	M02734.metal.pos.txt.gz	IPF	-0.0112	0.017115	0.1597	0.1574	0.0025	0.025588	9.579e-06	0.5036	7037	953873	0.00284401	20.0647
1452	rs17720371	T	C	T	C	M02734.metal.pos.txt.gz	IPF	-0.0078	-0.0048799	0.4737	0.4592	0.0017	0.018701	6.329e-06	0.7941	7037	953873	0.00298268	21.0459
1453	rs2111718	A	G	A	G	M02734.metal.pos.txt.gz	IPF	-0.0227	0.034296	0.8615	0.8434	0.005	0.025599	4.996e-06	0.1803	1667	953873	0.0122135	20.5869
1454	rs2250515	T	G	T	G	M02734.metal.pos.txt.gz	IPF	-0.0083	-0.030688	0.5346	0.5477	0.0017	0.018727	1.595e-06	0.1013	7037	953873	0.003376	23.8306
1455	rs2396461	T	C	T	C	M02734.metal.pos.txt.gz	IPF	0.0117	-0.0035691	0.121	0.1801	0.0026	0.02646	8.377e-06	0.8927	7037	937232	0.00286939	20.2442
1456	rs2504282	A	G	A	G	M02734.metal.pos.txt.gz	IPF	0.0191	-0.0094541	0.9338	0.921	0.0042	0.034291	6.703e-06	0.7828	7037	953873	0.00293026	20.675
1457	rs2933568	T	C	T	C	M02734.metal.pos.txt.gz	IPF	-0.008	0.00040901	0.3125	0.3008	0.0018	0.020106	6.225e-06	0.9838	7037	953873	0.00279917	19.7475
1458	rs322614	A	G	A	G	M02734.metal.pos.txt.gz	IPF	0.0084	-0.022367	0.3892	0.4037	0.0017	0.019198	1.7e-06	0.244	7037	953873	0.00345755	24.4083
1459	rs353620	A	G	A	G	M02734.metal.pos.txt.gz	IPF	-0.0077	-0.0064985	0.6613	0.6557	0.0017	0.019663	9.8e-06	0.741	7037	953873	0.00290691	20.5097
1460	rs3936152	T	C	T	C	M02734.metal.pos.txt.gz	IPF	0.0079	0.019603	0.6051	0.5966	0.0018	0.018954	5.924e-06	0.301	7037	953873	0.00272982	19.2569
1461	rs4487134	T	G	T	G	M02734.metal.pos.txt.gz	IPF	-0.0083	0.015745	0.355	0.3661	0.0017	0.020688	1.99e-06	0.4466	7037	903869	0.003376	23.8306
1462	rs5010651	T	C	T	C	M02734.metal.pos.txt.gz	IPF	-0.0132	0.0080384	0.8332	0.6527	0.0025	0.019847	1.765e-07	0.6855	7037	953873	0.00394606	27.8705
1463	rs5751902	T	C	T	C	M02734.metal.pos.txt.gz	IPF	0.012	-0.017836	0.3762	0.3779	0.0025	0.019362	2.381e-06	0.357	7037	953873	0.00326344	23.0335
1464	rs6456786	T	C	T	C	M02734.metal.pos.txt.gz	IPF	-0.008	0.025375	0.3582	0.3914	0.0018	0.019352	5.665e-06	0.1898	7037	953873	0.00279917	19.7475
1465	rs8013373	A	G	A	G	M02734.metal.pos.txt.gz	IPF	-0.0091	0.0051186	0.3428	0.3851	0.0018	0.019281	4.988e-07	0.7906	7037	953873	0.00361889	25.5514
1466	rs848767	T	C	T	C	M02734.metal.pos.txt.gz	IPF	-0.0179	0.0080743	0.0696	0.07125	0.0039	0.038195	3.455e-06	0.8326	7037	903869	0.00298463	21.0598
1467	rs9310707	A	G	A	G	M02734.metal.pos.txt.gz	IPF	-0.0082	-9.5901e-06	0.3473	0.3754	0.0018	0.021033	6.378e-06	0.9996	7037	903869	0.00294047	20.7472
1468	rs9895157	T	C	T	C	M02734.metal.pos.txt.gz	IPF	-0.0079	0.006485	0.6536	0.6487	0.0018	0.019938	6.332e-06	0.745	7037	819655	0.00272982	19.2569
1469	rs9940990	A	T	A	T	M02734.metal.pos.txt.gz	IPF	-0.0104	-0.038062	0.3545	0.3622	0.0018	0.019589	4.745e-09	0.05202	7037	953873	0.00472149	33.3732
1475	rs10878072	A	G	A	G	M03127.metal.pos.txt.gz	IPF	0.0137	0.025347	0.6887	0.6692	0.003	0.02125	7.135e-06	0.2329	6941	903869	0.00299553	20.8484
1476	rs113515	C	G	C	G	M03127.metal.pos.txt.gz	IPF	-0.0109	0.033193	0.5982	0.6042	0.0024	0.020368	8.092e-06	0.1032	6941	903869	0.00296292	20.6208
1477	rs11595079	T	G	T	G	M03127.metal.pos.txt.gz	IPF	-0.0214	-0.023919	0.0951	0.1112	0.0045	0.030562	1.888e-06	0.4339	6941	953873	0.00324764	22.6088
1478	rs1433818	T	C	T	C	M03127.metal.pos.txt.gz	IPF	0.0206	-0.0043515	0.0808	0.0721	0.0046	0.037896	6.99e-06	0.9086	6941	903869	0.002881	20.049
1479	rs1587235	A	G	A	G	M03127.metal.pos.txt.gz	IPF	-0.0132	-0.021726	0.3312	0.3504	0.0029	0.019816	6.47e-06	0.2729	6941	953873	0.00297602	20.7122
1480	rs16948294	A	T	A	T	M03127.metal.pos.txt.gz	IPF	-0.041	0.037464	0.0694	0.08288	0.0085	0.037024	1.354e-06	0.3116	1745	903869	0.0131578	23.2398
1481	rs2113305	T	G	T	G	M03127.metal.pos.txt.gz	IPF	-0.0134	0.052403	0.2651	0.3022	0.0029	0.022072	4.952e-06	0.01759	6941	903869	0.0030666	21.3446
1482	rs2145985	T	C	T	C	M03127.metal.pos.txt.gz	IPF	-0.0152	0.01871	0.16	0.1586	0.0033	0.02536	3.911e-06	0.4606	6941	953873	0.00304728	21.2097
1483	rs2247330	T	C	T	C	M03127.metal.pos.txt.gz	IPF	0.0124	-0.028856	0.6524	0.6525	0.0025	0.019582	4.564e-07	0.1406	6941	953873	0.00353187	24.5945
1484	rs275721	A	C	A	C	M03127.metal.pos.txt.gz	IPF	-0.016	-0.003443	0.509	0.4871	0.003	0.018651	9.643e-08	0.8535	5196	953873	0.00544449	28.4335
1485	rs4147184	A	G	A	G	M03127.metal.pos.txt.gz	IPF	0.0112	-0.0028652	0.6082	0.6383	0.0025	0.020885	6.728e-06	0.8909	6941	903869	0.00288323	20.0646
1486	rs4676313	T	C	T	C	M03127.metal.pos.txt.gz	IPF	0.0179	-0.0074824	0.8778	0.8912	0.0039	0.029881	3.535e-06	0.8023	6941	953873	0.00302579	21.0597
1487	rs4776752	A	G	A	G	M03127.metal.pos.txt.gz	IPF	0.0178	0.013741	0.1512	0.1658	0.0039	0.025247	4.234e-06	0.5863	6941	953873	0.00299218	20.825
1488	rs7644390	A	T	A	T	M03127.metal.pos.txt.gz	IPF	0.0129	-0.013361	0.3478	0.3589	0.0025	0.01954	1.756e-07	0.4941	6941	953873	0.00382133	26.6179
1489	rs9379061	C	G	C	G	M03127.metal.pos.txt.gz	IPF	-0.0456	0.053196	0.9562	0.9629	0.0099	0.052818	3.918e-06	0.3139	1745	937232	0.012012	21.1915
1495	rs11943623	A	G	A	G	M03141.metal.pos.txt.gz	IPF	-0.0115	-0.0339	0.1709	0.168	0.0026	0.025204	8.402e-06	0.1786	7357	953873	0.00265213	19.5583
1496	rs12151827	T	C	T	C	M03141.metal.pos.txt.gz	IPF	-0.0141	0.0041143	0.8159	0.8115	0.0026	0.02346	6.347e-08	0.8608	7357	953873	0.0039816	29.4018
1497	rs12190141	A	G	A	G	M03141.metal.pos.txt.gz	IPF	0.0616	-0.046877	0.9723	0.96979	0.0139	0.056698	9.9e-06	0.4084	1759	953873	0.0110419	19.6172
1498	rs12569219	A	C	A	C	M03141.metal.pos.txt.gz	IPF	-0.0118	0.05571	0.1612	0.157	0.0026	0.025625	5.823e-06	0.0297	7357	953873	0.00279192	20.592
1499	rs1535039	T	C	T	C	M03141.metal.pos.txt.gz	IPF	0.0175	-0.10864	0.912	0.90374	0.0035	0.032874	4.491e-07	0.0009501	7357	888793	0.00338662	24.9932
1500	rs164372	T	C	T	C	M03141.metal.pos.txt.gz	IPF	0.012	-0.018652	0.8036	0.7879	0.0025	0.022746	2.641e-06	0.4122	7357	953873	0.00312193	23.0337
1501	rs16876394	T	C	T	C	M03141.metal.pos.txt.gz	IPF	0.0304	-0.02873	0.8993	0.8976	0.0034	0.030876	1.488e-19	0.3521	7357	953873	0.0107497	79.9229
1502	rs17595065	A	G	A	G	M03141.metal.pos.txt.gz	IPF	0.0347	0.071331	0.9724	0.97853	0.0078	0.065911	9.73e-06	0.2791	7357	953873	0.00268289	19.7857
1503	rs2396726	T	C	T	C	M03141.metal.pos.txt.gz	IPF	-0.0179	-0.0065795	0.5395	0.5184	0.0039	0.018704	4.519e-06	0.725	1759	953873	0.0118343	21.0418
1504	rs2851391	T	C	T	C	M03141.metal.pos.txt.gz	IPF	-0.0121	0.0040675	0.4582	0.4425	0.0018	0.024214	1.146e-11	0.8666	7357	673184	0.00610472	45.176
1505	rs3797248	A	G	A	G	M03141.metal.pos.txt.gz	IPF	0.012	0.041939	0.1651	0.1811	0.0026	0.024379	4.624e-06	0.08538	7357	953873	0.00288708	21.296
1506	rs4646359	T	C	T	C	M03141.metal.pos.txt.gz	IPF	-0.0083	0.014964	0.5297	0.5078	0.0018	0.018668	3.202e-06	0.4228	7357	953873	0.00288176	21.2566
1507	rs495360	A	C	A	C	M03141.metal.pos.txt.gz	IPF	-0.019	-0.025508	0.497	0.5039	0.003	0.020594	2.399e-10	0.2155	5598	903869	0.00711428	40.0968
1508	rs715	T	C	T	C	M03141.metal.pos.txt.gz	IPF	0.0221	-0.017156	0.713	0.6888	0.0025	0.019995	2.077e-19	0.3909	7357	953873	0.0105103	78.1244
1509	rs7668550	T	G	T	G	M03141.metal.pos.txt.gz	IPF	-0.0368	-0.075824	0.0157	0.01559	0.0081	0.079761	5.536e-06	0.3418	7357	903869	0.00279774	20.6351
1510	rs9462856	T	C	T	C	M03141.metal.pos.txt.gz	IPF	-0.0093	0.022614	0.4711	0.4855	0.0018	0.01869	1.995e-07	0.2263	7357	953873	0.00361532	26.6872
1511	rs9886534	T	C	T	C	M03141.metal.pos.txt.gz	IPF	-0.0079	0.0047663	0.5101	0.4881	0.0018	0.018683	8.744e-06	0.7986	7357	953873	0.0026114	19.2571
1517	rs10874852	A	C	A	C	M03147.metal.pos.txt.gz	IPF	0.0397	-0.0030056	0.0333	0.03338	0.0081	0.062424	1.082e-06	0.9616	6515	571637	0.00367365	24.0147
1518	rs11250123	A	G	A	G	M03147.metal.pos.txt.gz	IPF	-0.0494	0.017962	0.043	0.04815	0.0097	0.041677	3.833e-07	0.6665	1748	953873	0.0146208	25.9068
1519	rs2837424	T	C	T	C	M03147.metal.pos.txt.gz	IPF	-0.0152	0.00267	0.1928	0.2006	0.0034	0.028057	7.358e-06	0.9242	6515	705855	0.00305833	19.98
1520	rs4673167	A	G	A	G	M03147.metal.pos.txt.gz	IPF	-0.021	0.061829	0.889	0.91466	0.0044	0.032505	1.702e-06	0.05715	6515	953873	0.0034842	22.7719
1521	rs4694292	T	C	T	C	M03147.metal.pos.txt.gz	IPF	0.0201	-0.0049254	0.1089	0.108	0.0045	0.029905	6.439e-06	0.8692	6515	953873	0.00305299	19.945
1527	rs10514491	T	C	T	C	M10642.metal.pos.txt.gz	IPF	0.0094	-0.00031646	0.6781	0.6832	0.0017	0.02171	4.457e-08	0.9884	7352	903869	0.00414143	30.5661
1528	rs11196097	A	G	A	G	M10642.metal.pos.txt.gz	IPF	0.0111	0.001877	0.1128	0.09605	0.0025	0.036434	9.828e-06	0.9589	7352	887228	0.00267422	19.7082
1529	rs11664190	T	C	T	C	M10642.metal.pos.txt.gz	IPF	-0.0082	0.0039717	0.592	0.6191	0.0016	0.020687	6.471e-07	0.8478	7352	903869	0.00355986	26.2585
1530	rs12001701	A	G	A	G	M10642.metal.pos.txt.gz	IPF	-0.0315	-0.016827	0.052	0.0433	0.0066	0.071987	1.888e-06	0.8152	1764	623180	0.0127486	22.7531
1531	rs12026398	T	C	T	C	M10642.metal.pos.txt.gz	IPF	-0.014	0.048104	0.8893	0.8676	0.0029	0.027648	9.427e-07	0.08188	7352	953873	0.00315995	23.2992
1532	rs12136055	T	C	T	C	M10642.metal.pos.txt.gz	IPF	-0.0731	-0.0068563	0.0129	0.01149	0.0153	0.091044	1.754e-06	0.94	1764	937232	0.0127752	22.8013
1533	rs12586821	T	C	T	C	M10642.metal.pos.txt.gz	IPF	0.0129	0.051109	0.1222	0.1276	0.0025	0.030441	1.615e-07	0.09316	7352	903869	0.00360848	26.6184
1534	rs1530919	A	G	A	G	M10642.metal.pos.txt.gz	IPF	0.0076	0.01063	0.3006	0.3065	0.0017	0.020394	5.918e-06	0.6022	7352	953873	0.0027111	19.9807
1535	rs1576171	A	T	A	T	M10642.metal.pos.txt.gz	IPF	-0.043	-0.031287	0.984	0.5855	0.009	0.01892	1.772e-06	0.0982	5588	953873	0.00406841	22.819
1536	rs17616891	A	T	A	T	M10642.metal.pos.txt.gz	IPF	-0.0076	0.012128	0.6964	0.7319	0.0017	0.020846	4.651e-06	0.5607	7352	953873	0.0027111	19.9807
1537	rs17695897	T	C	T	C	M10642.metal.pos.txt.gz	IPF	0.011	-0.037106	0.153	0.1516	0.0025	0.02819	8.025e-06	0.1881	7352	903869	0.00262638	19.3547
1538	rs2725779	T	C	T	C	M10642.metal.pos.txt.gz	IPF	0.0077	0.0099367	0.4523	0.4462	0.0017	0.018739	3.274e-06	0.5959	7352	953873	0.00278271	20.51
1539	rs3781273	A	G	A	G	M10642.metal.pos.txt.gz	IPF	0.0074	-0.0024103	0.5139	0.4979	0.0017	0.019925	8.523e-06	0.9037	7352	937232	0.00257065	18.9429
1540	rs4436895	C	G	C	G	M10642.metal.pos.txt.gz	IPF	-0.01	0.011256	0.252	0.286	0.0022	0.020763	3.47e-06	0.5877	7352	953873	0.0028024	20.6555
1541	rs4483514	T	G	T	G	M10642.metal.pos.txt.gz	IPF	0.009	0.025313	0.357	0.3572	0.002	0.019416	6.795e-06	0.1923	5588	953873	0.00361075	20.2428
1542	rs4812805	C	G	C	G	M10642.metal.pos.txt.gz	IPF	-0.0109	0.010173	0.8421	0.8463	0.0024	0.025828	5.881e-06	0.6937	7352	953873	0.00279775	20.6211
1543	rs4818244	T	C	T	C	M10642.metal.pos.txt.gz	IPF	0.0136	-0.037977	0.0939	0.1305	0.003	0.032147	6.608e-06	0.2375	7352	887228	0.00278752	20.5455
1544	rs569114	A	G	A	G	M10642.metal.pos.txt.gz	IPF	-0.0079	0.026004	0.6199	0.6331	0.0017	0.020681	1.991e-06	0.2086	7352	903869	0.00292871	21.5893
1545	rs6540619	T	C	T	C	M10642.metal.pos.txt.gz	IPF	0.0076	-0.018295	0.434	0.4841	0.0016	0.0202	3.706e-06	0.3651	7352	903869	0.0030595	22.5564
1546	rs6557106	T	C	T	C	M10642.metal.pos.txt.gz	IPF	0.0076	0.0075059	0.6715	0.6687	0.0017	0.019895	5.417e-06	0.706	7352	953873	0.0027111	19.9807
1547	rs6828152	T	G	T	G	M10642.metal.pos.txt.gz	IPF	0.009	0.028785	0.359	0.3631	0.002	0.019469	6.795e-06	0.1393	5588	953873	0.00361075	20.2428
1548	rs8043217	A	G	A	G	M10642.metal.pos.txt.gz	IPF	0.009	-0.023134	0.524	0.5201	0.0016	0.018692	2.793e-08	0.2159	7352	953873	0.00428523	31.632
1549	rs8128639	A	C	A	C	M10642.metal.pos.txt.gz	IPF	-0.0113	0.0013531	0.1698	0.2276	0.0025	0.022417	6.513e-06	0.9519	7352	953873	0.00277119	20.4248
1550	rs947099	A	G	A	G	M10642.metal.pos.txt.gz	IPF	-0.008	0.042333	0.3625	0.3401	0.0017	0.019657	1.221e-06	0.03128	7352	953873	0.0030031	22.1393
1551	rs9529827	T	C	T	C	M10642.metal.pos.txt.gz	IPF	-0.0397	-0.090927	0.9843	0.97636	0.0087	0.066937	5.144e-06	0.1743	7352	953873	0.00282429	20.8173
1557	rs10404980	A	G	A	G	M11438.metal.pos.txt.gz	IPF	-0.0744	-0.049653	0.9877	0.98481	0.0158	0.082977	2.337e-06	0.5496	1764	903869	0.0124139	22.1482
1558	rs1466522	T	C	T	C	M11438.metal.pos.txt.gz	IPF	-0.0067	5.4732e-05	0.7645	0.737	0.0013	0.023024	3.149e-07	0.9981	7341	903869	0.00360528	26.5549
1559	rs2921879	T	C	T	C	M11438.metal.pos.txt.gz	IPF	-0.0055	0.0033745	0.5999	0.6163	0.0012	0.030087	8.665e-06	0.9107	7341	623180	0.00285343	21.0012
1560	rs4641759	T	C	T	C	M11438.metal.pos.txt.gz	IPF	-0.0135	0.0029268	0.7521	0.6607	0.003	0.019667	6.66e-06	0.8817	1764	953873	0.0113493	20.227
1561	rs6126354	T	C	T	C	M11438.metal.pos.txt.gz	IPF	-0.0134	0.012887	0.7906	0.619	0.0029	0.02072	5.463e-06	0.534	1764	903869	0.0119589	21.3266
1567	rs10012175	T	C	T	C	M12017.metal.pos.txt.gz	IPF	0.0194	0.0052574	0.1065	0.1223	0.0043	0.029569	5.781e-06	0.8589	5656	953873	0.00358589	20.3476
1568	rs10963172	A	G	A	G	M12017.metal.pos.txt.gz	IPF	0.0352	0.013276	0.9724	0.96114	0.0078	0.050255	6.987e-06	0.7916	5656	953873	0.00358778	20.3583
1569	rs11192702	A	G	A	G	M12017.metal.pos.txt.gz	IPF	-0.0275	0.010454	0.0456	0.04122	0.0062	0.044915	7.881e-06	0.816	5656	953873	0.00346629	19.6666
1570	rs11564710	A	C	A	C	M12017.metal.pos.txt.gz	IPF	0.0166	0.01657	0.3886	0.416	0.0034	0.01905	9.788e-07	0.3844	5656	953873	0.00419684	23.8289
1571	rs12131781	A	G	A	G	M12017.metal.pos.txt.gz	IPF	0.0126	0.0028664	0.7091	0.7084	0.0027	0.020508	2.588e-06	0.8888	5656	953873	0.00383562	21.7701
1572	rs12538514	C	G	C	G	M12017.metal.pos.txt.gz	IPF	0.0124	0.01303	0.3714	0.3864	0.0026	0.019092	2.434e-06	0.4949	5656	953873	0.00400538	22.7375
1573	rs339707	T	G	T	G	M12017.metal.pos.txt.gz	IPF	-0.0142	0.0075179	0.6768	0.6828	0.0026	0.021414	6.347e-08	0.7255	5656	903869	0.0052461	29.8179
1574	rs7514881	C	G	C	G	M12017.metal.pos.txt.gz	IPF	0.012	0.0073999	0.2524	0.2626	0.0027	0.021351	8.532e-06	0.7289	5656	953873	0.00348026	19.7461
1575	rs7908166	A	G	A	G	M12017.metal.pos.txt.gz	IPF	-0.0356	-0.0031215	0.9724	0.96538	0.0079	0.055421	7.678e-06	0.9551	5656	903869	0.0035775	20.2998
1576	rs9323203	A	C	A	C	M12017.metal.pos.txt.gz	IPF	-0.0118	-0.033868	0.7331	0.7127	0.0027	0.022174	9.5e-06	0.1267	5656	903869	0.0033656	19.0934
1582	rs10514491	T	C	T	C	M12035.metal.pos.txt.gz	IPF	0.0122	-0.00031646	0.6801	0.6832	0.0024	0.02171	6.729e-07	0.9884	7356	903869	0.00350052	25.8333
1583	rs10848204	T	C	T	C	M12035.metal.pos.txt.gz	IPF	0.0093	-0.019005	0.5451	0.5523	0.0018	0.020109	1.258e-07	0.3446	7356	903869	0.00361581	26.6872
1584	rs11937702	A	G	A	G	M12035.metal.pos.txt.gz	IPF	0.0157	0.037833	0.1122	0.09561	0.0033	0.032953	2.387e-06	0.2509	7356	903869	0.00306758	22.6284
1585	rs1229590	A	G	A	G	M12035.metal.pos.txt.gz	IPF	-0.0084	0.030768	0.505	0.5434	0.0018	0.020382	5.231e-06	0.1311	7356	903869	0.00295181	21.7719
1586	rs1447842	A	G	A	G	M12035.metal.pos.txt.gz	IPF	0.0082	0.004142	0.5745	0.5266	0.0017	0.018739	2.849e-06	0.8251	7356	953873	0.00315295	23.2601
1587	rs16886123	A	G	A	G	M12035.metal.pos.txt.gz	IPF	-0.0119	-0.0098698	0.8616	0.8782	0.0026	0.028411	3.714e-06	0.7283	7356	953873	0.00283969	20.9425
1588	rs1846975	A	G	A	G	M12035.metal.pos.txt.gz	IPF	0.0083	-0.0012378	0.3554	0.3221	0.0018	0.019811	2.56e-06	0.9502	7356	953873	0.00288215	21.2566
1589	rs1866411	A	C	A	C	M12035.metal.pos.txt.gz	IPF	-0.0085	-0.012572	0.3468	0.3498	0.0018	0.02211	1.406e-06	0.5696	7356	621641	0.00302229	22.2933
1590	rs1938479	T	C	T	C	M12035.metal.pos.txt.gz	IPF	-0.01	0.0097653	0.6445	0.6691	0.0018	0.019848	1.784e-08	0.6227	7356	953873	0.00417825	30.8558
1591	rs2049534	T	C	T	C	M12035.metal.pos.txt.gz	IPF	-0.0082	-0.0087519	0.5044	0.5	0.0018	0.02054	3.175e-06	0.67	7356	903869	0.00281331	20.7474
1592	rs2286396	T	C	T	C	M12035.metal.pos.txt.gz	IPF	0.0117	-0.061277	0.1505	0.166	0.0026	0.027003	5.595e-06	0.02325	7356	903869	0.0027453	20.2445
1593	rs2863202	T	C	T	C	M12035.metal.pos.txt.gz	IPF	0.0114	0.021012	0.178	0.2162	0.0025	0.02321	6.934e-06	0.3653	7356	953873	0.00281879	20.7879
1594	rs4646880	A	G	A	G	M12035.metal.pos.txt.gz	IPF	-0.0085	-0.013091	0.5434	0.5209	0.0018	0.020124	1.498e-06	0.5153	7356	903869	0.00302229	22.2933
1595	rs4834846	A	G	A	G	M12035.metal.pos.txt.gz	IPF	0.0079	-0.0012987	0.5501	0.5517	0.0018	0.018789	6.516e-06	0.9449	7356	953873	0.00261175	19.2571
1596	rs4848532	T	C	T	C	M12035.metal.pos.txt.gz	IPF	-0.0079	-0.0082542	0.4842	0.4707	0.0018	0.020198	9.764e-06	0.6828	7356	903869	0.00261175	19.2571
1597	rs630782	T	C	T	C	M12035.metal.pos.txt.gz	IPF	0.0077	-0.011784	0.4728	0.4635	0.0017	0.018718	9.38e-06	0.529	7356	953873	0.0027812	20.51
1598	rs6864461	C	G	C	G	M12035.metal.pos.txt.gz	IPF	0.0088	-0.006364	0.3644	0.3432	0.0018	0.019612	6.755e-07	0.7456	7356	953873	0.00323869	23.8947
1599	rs7136574	T	C	T	C	M12035.metal.pos.txt.gz	IPF	0.0093	-0.012234	0.4345	0.4166	0.0018	0.018939	1.325e-07	0.5183	7356	953873	0.00361581	26.6872
1600	rs7214330	T	C	T	C	M12035.metal.pos.txt.gz	IPF	0.0144	0.05695	0.1256	0.1448	0.0032	0.026511	9.757e-06	0.0317	7356	953873	0.0027453	20.2445
1601	rs7642054	T	C	T	C	M12035.metal.pos.txt.gz	IPF	-0.0171	-0.036919	0.5887	0.5692	0.0037	0.021755	4.638e-06	0.08968	1766	887228	0.0119502	21.3352
1602	rs7809262	A	G	A	G	M12035.metal.pos.txt.gz	IPF	-0.0088	-0.012007	0.425	0.4106	0.0017	0.02025	4.409e-07	0.5532	7356	903869	0.0036295	26.7886
1603	rs8079173	A	G	A	G	M12035.metal.pos.txt.gz	IPF	0.0119	0.029267	0.1414	0.1652	0.0026	0.025679	3.422e-06	0.2544	7356	953873	0.00283969	20.9425
1604	rs899227	A	G	A	G	M12035.metal.pos.txt.gz	IPF	-0.0084	0.0012129	0.3958	0.4398	0.0018	0.020307	2.971e-06	0.9524	7356	903869	0.00295181	21.7719
1605	rs9513489	T	C	T	C	M12035.metal.pos.txt.gz	IPF	0.0078	0.033984	0.5888	0.5831	0.0018	0.018992	8.48e-06	0.07355	7356	953873	0.00254622	18.7727
1611	rs10520198	A	G	A	G	M12067.metal.pos.txt.gz	IPF	0.0186	-0.091619	0.0296	0.03663	0.0041	0.050701	5.637e-06	0.07075	7081	953873	0.00289803	20.5748
1612	rs10839561	C	G	C	G	M12067.metal.pos.txt.gz	IPF	-0.0177	-0.027634	0.9453	0.92962	0.0039	0.03612	6.461e-06	0.4442	7081	953873	0.00290042	20.5918
1613	rs1122530	A	G	A	G	M12067.metal.pos.txt.gz	IPF	-0.0094	-0.051089	0.8519	0.856	0.0018	0.026163	1.491e-07	0.05086	7081	953873	0.0038366	27.2639
1614	rs11912450	A	T	A	T	M12067.metal.pos.txt.gz	IPF	-0.0078	-0.017301	0.1939	0.2024	0.0018	0.02543	8.581e-06	0.4963	7081	903869	0.00264484	18.7725
1615	rs1216886	A	G	A	G	M12067.metal.pos.txt.gz	IPF	-0.008	-0.0067064	0.858	0.8491	0.0018	0.028131	6.882e-06	0.8116	7081	903869	0.00278183	19.7475
1616	rs12826254	T	C	T	C	M12067.metal.pos.txt.gz	IPF	0.0091	-0.011087	0.1364	0.1405	0.0018	0.026766	7.048e-07	0.6787	7081	953873	0.00359649	25.5514
1617	rs16883391	A	C	A	C	M12067.metal.pos.txt.gz	IPF	-0.0084	-0.01907	0.1921	0.2321	0.0017	0.022623	1.199e-06	0.3992	7081	953873	0.00343614	24.4083
1618	rs17031632	A	G	A	G	M12067.metal.pos.txt.gz	IPF	0.0133	0.020099	0.9284	0.91647	0.0027	0.033901	5.693e-07	0.5533	7081	953873	0.00341504	24.2579
1619	rs170631	C	G	C	G	M12067.metal.pos.txt.gz	IPF	-0.0208	-0.0033674	0.8913	0.9085	0.0043	0.031385	1.777e-06	0.9146	1747	953873	0.0132166	23.3718
1620	rs17094565	A	T	A	T	M12067.metal.pos.txt.gz	IPF	-0.0125	-0.0042915	0.9357	0.93081	0.0026	0.03726	1.884e-06	0.9083	7081	953873	0.00325359	23.1074
1621	rs17233321	A	G	A	G	M12067.metal.pos.txt.gz	IPF	-0.0175	-0.039843	0.9519	0.95143	0.0034	0.050246	3.736e-07	0.4278	7081	903869	0.00372736	26.4847
1622	rs196885	T	C	T	C	M12067.metal.pos.txt.gz	IPF	-0.0086	-0.012936	0.8501	0.8285	0.0018	0.026988	1.22e-06	0.6317	7081	903869	0.00321336	22.8207
1623	rs2944772	C	G	C	G	M12067.metal.pos.txt.gz	IPF	-0.0079	-0.015905	0.8193	0.8121	0.0018	0.023793	7.038e-06	0.5038	7081	953873	0.00271291	19.2569
1624	rs4519482	A	T	A	T	M12067.metal.pos.txt.gz	IPF	-0.0091	-0.0040224	0.291	0.353	0.0017	0.019729	8.791e-08	0.8384	7081	953873	0.00403029	28.6459
1625	rs6140831	A	C	A	C	M12067.metal.pos.txt.gz	IPF	0.0089	0.0052558	0.5484	0.5855	0.0016	0.020349	5.398e-08	0.7962	7081	903869	0.00435063	30.9327
1626	rs686321	T	C	T	C	M12067.metal.pos.txt.gz	IPF	0.0082	0.024168	0.8232	0.812	0.0017	0.025878	2.138e-06	0.3503	7081	903869	0.00327499	23.2599
1627	rs6967282	A	G	A	G	M12067.metal.pos.txt.gz	IPF	0.0088	0.026356	0.797	0.7818	0.0017	0.024543	3.962e-07	0.2829	7081	903869	0.00376992	26.7883
1628	rs7134822	A	G	A	G	M12067.metal.pos.txt.gz	IPF	-0.0164	0.00097771	0.9597	0.9536	0.0035	0.048653	3.872e-06	0.984	7081	937232	0.0030911	21.9497
1629	rs7279224	A	T	A	T	M12067.metal.pos.txt.gz	IPF	0.0077	0.0047803	0.6952	0.645	0.0017	0.021078	6.868e-06	0.8206	7081	903869	0.0028889	20.5098
1635	rs10494270	A	G	A	G	M12129.metal.pos.txt.gz	IPF	0.0119	-0.019101	0.7114	0.7268	0.0027	0.020627	8.63e-06	0.3545	6864	953873	0.00282203	19.4196
1636	rs10945649	A	T	A	T	M12129.metal.pos.txt.gz	IPF	0.0212	-0.011442	0.1287	0.1375	0.0036	0.029318	4.291e-09	0.6963	6864	903869	0.00502691	34.6689
1637	rs11605057	T	C	T	C	M12129.metal.pos.txt.gz	IPF	-0.0202	-0.088041	0.8787	0.8873	0.0043	0.028772	2.238e-06	0.002214	6864	953873	0.00320475	22.0617
1638	rs11858062	T	C	T	C	M12129.metal.pos.txt.gz	IPF	0.0213	0.038957	0.9142	0.8703	0.0044	0.028553	1.654e-06	0.1724	6864	953873	0.00340249	23.4276
1639	rs11869714	A	G	A	G	M12129.metal.pos.txt.gz	IPF	-0.0126	-0.016378	0.7762	0.7936	0.0027	0.02406	4.245e-06	0.496	6864	903869	0.00316272	21.7714
1640	rs12950972	T	C	T	C	M12129.metal.pos.txt.gz	IPF	-0.0133	0.0059069	0.6497	0.6373	0.0027	0.020939	9.841e-07	0.7779	6864	903869	0.00352262	24.2577
1641	rs1337278	A	G	A	G	M12129.metal.pos.txt.gz	IPF	0.0124	0.0081852	0.6107	0.5979	0.0027	0.018983	3.677e-06	0.6663	6864	953873	0.00306342	21.0858
1642	rs1448817	A	G	A	G	M12129.metal.pos.txt.gz	IPF	0.0124	0.01749	0.7393	0.7205	0.0027	0.020934	4.563e-06	0.4034	6864	953873	0.00306342	21.0858
1643	rs17386586	A	C	A	C	M12129.metal.pos.txt.gz	IPF	-0.0134	0.012506	0.2495	0.2256	0.0027	0.022073	9.741e-07	0.571	6864	953873	0.0035756	24.6238
1644	rs2130791	A	G	A	G	M12129.metal.pos.txt.gz	IPF	0.0121	0.040681	0.7132	0.7299	0.0027	0.020827	7.964e-06	0.05079	6864	953873	0.00291741	20.0778
1645	rs3778889	T	C	T	C	M12129.metal.pos.txt.gz	IPF	0.0246	0.071296	0.0616	0.06616	0.0053	0.037247	3.416e-06	0.0556	6864	953873	0.00312882	21.5373
1646	rs6477873	T	C	T	C	M12129.metal.pos.txt.gz	IPF	0.0131	-0.013044	0.6394	0.6292	0.0027	0.019769	9.506e-07	0.5094	6864	819655	0.00341783	23.5336
1647	rs6952850	A	G	A	G	M12129.metal.pos.txt.gz	IPF	-0.012	0.0095267	0.6998	0.6688	0.0027	0.021418	6.875e-06	0.6565	6864	903869	0.00286952	19.7473
1648	rs7178596	A	G	A	G	M12129.metal.pos.txt.gz	IPF	-0.012	0.023091	0.3535	0.3802	0.0027	0.020842	7.922e-06	0.2679	6864	903869	0.00286952	19.7473
1649	rs7446718	A	G	A	G	M12129.metal.pos.txt.gz	IPF	-0.0417	0.023619	0.8591	0.8303	0.0082	0.024901	3.832e-07	0.3429	1586	953873	0.0160442	25.8283
1650	rs7544738	A	G	A	G	M12129.metal.pos.txt.gz	IPF	0.0132	0.012951	0.4114	0.3948	0.0027	0.019103	7.152e-07	0.4978	6864	953873	0.00347003	23.8943
1651	rs7660017	A	G	A	G	M12129.metal.pos.txt.gz	IPF	-0.0131	-0.044353	0.3331	0.3342	0.0028	0.019835	2.339e-06	0.02534	6864	953873	0.00317882	21.8827
1652	rs789195	A	G	A	G	M12129.metal.pos.txt.gz	IPF	-0.0128	0.006026	0.7657	0.7686	0.0027	0.021903	2.526e-06	0.7832	6864	953873	0.00326359	22.4681
1653	rs943251	T	G	T	G	M12129.metal.pos.txt.gz	IPF	0.0118	0.030552	0.3712	0.3742	0.0027	0.019277	9.899e-06	0.113	6864	953873	0.00277493	19.0946
1654	rs9460599	T	C	T	C	M12129.metal.pos.txt.gz	IPF	0.0302	0.010274	0.2443	0.2429	0.0066	0.023369	4.862e-06	0.6602	1586	903869	0.0130295	20.9112
1655	rs9841498	T	C	T	C	M12129.metal.pos.txt.gz	IPF	0.0145	0.0085435	0.2663	0.2641	0.0027	0.022616	7.117e-08	0.7056	6864	903869	0.00418418	28.8325
1661	rs10975331	T	C	T	C	M12261.metal.pos.txt.gz	IPF	0.1208	0.014863	0.0361	0.04109	0.0273	0.04675	9.601e-06	0.7505	1543	953873	0.0125304	19.5544
1662	rs11241933	A	T	A	T	M12261.metal.pos.txt.gz	IPF	-0.061	0.0034335	0.2705	0.2463	0.0125	0.022923	1.053e-06	0.8809	1543	903869	0.0151992	23.7835
1663	rs11949031	A	G	A	G	M12261.metal.pos.txt.gz	IPF	0.0662	-0.021407	0.1629	0.1602	0.0138	0.025572	1.522e-06	0.4025	1543	953873	0.0146948	22.9824
1664	rs17022499	A	T	A	T	M12261.metal.pos.txt.gz	IPF	0.054	-0.014224	0.2267	0.2377	0.0122	0.022739	9.71e-06	0.5316	1543	953873	0.0125378	19.5661
1665	rs17403795	A	G	A	G	M12261.metal.pos.txt.gz	IPF	0.073	0.020276	0.1166	0.1232	0.0161	0.028472	5.607e-06	0.4764	1543	953873	0.0131486	20.532
1666	rs1898906	A	G	A	G	M12261.metal.pos.txt.gz	IPF	0.1378	0.051678	0.0296	0.02207	0.0299	0.05937	4.087e-06	0.3841	1543	953873	0.0135785	21.2125
1667	rs4632709	T	C	T	C	M12261.metal.pos.txt.gz	IPF	-0.1504	0.033938	0.95	0.95076	0.0297	0.041689	3.995e-07	0.4156	963	953873	0.0259384	25.5906
1668	rs4896370	A	G	A	G	M12261.metal.pos.txt.gz	IPF	0.0555	-0.00081341	0.3542	0.3906	0.0121	0.022774	4.191e-06	0.9715	1543	887228	0.0134514	21.0113
1669	rs7961079	A	G	A	G	M12261.metal.pos.txt.gz	IPF	0.0527	0.032054	0.6241	0.6382	0.0109	0.019529	1.456e-06	0.1007	1543	953873	0.0149236	23.3456
1670	rs8137495	A	G	A	G	M12261.metal.pos.txt.gz	IPF	0.0602	-0.017939	0.7393	0.7476	0.0135	0.021204	7.8e-06	0.3975	1543	953873	0.0127233	19.8592
1676	rs10132580	T	G	T	G	M12593.metal.pos.txt.gz	IPF	0.0094	0.010072	0.1734	0.1868	0.0017	0.025753	5.674e-08	0.6957	7314	903869	0.00416285	30.566
1677	rs10279326	T	C	T	C	M12593.metal.pos.txt.gz	IPF	-0.0148	-0.019703	0.9522	0.9512	0.0033	0.04121	6.517e-06	0.6326	7314	953873	0.00274251	20.1084
1678	rs10483826	A	G	A	G	M12593.metal.pos.txt.gz	IPF	-0.0078	0.0052334	0.7932	0.7945	0.0017	0.023538	4.598e-06	0.824	7314	819655	0.00287004	21.0461
1679	rs10937658	A	G	A	G	M12593.metal.pos.txt.gz	IPF	0.0077	-0.031228	0.2676	0.2758	0.0017	0.022478	3.502e-06	0.1648	7314	903869	0.00279713	20.51
1680	rs11874996	T	C	T	C	M12593.metal.pos.txt.gz	IPF	-0.0523	0.008737	0.0175	0.02055	0.0115	0.074269	5.616e-06	0.9064	1750	887228	0.0116806	20.6591
1681	rs12042948	A	G	A	G	M12593.metal.pos.txt.gz	IPF	-0.0084	0.0076584	0.8045	0.793	0.0017	0.024656	1.402e-06	0.7561	7314	903869	0.00332704	24.4085
1682	rs12444778	T	C	T	C	M12593.metal.pos.txt.gz	IPF	-0.0156	-0.020755	0.0607	0.0749	0.0032	0.035461	1.612e-06	0.5583	7314	953873	0.00323881	23.7591
1683	rs12896482	T	C	T	C	M12593.metal.pos.txt.gz	IPF	-0.0109	-0.035186	0.8919	0.90273	0.0024	0.033017	4.174e-06	0.2866	7314	903869	0.00281224	20.6211
1684	rs1556988	A	G	A	G	M12593.metal.pos.txt.gz	IPF	-0.0077	-0.0061999	0.7923	0.804	0.0017	0.024949	5.861e-06	0.8037	7314	903869	0.00279713	20.51
1685	rs1615157	T	C	T	C	M12593.metal.pos.txt.gz	IPF	0.0076	-0.026655	0.5764	0.6128	0.0016	0.020578	2.224e-06	0.1952	7314	903869	0.00307535	22.5563
1686	rs17562832	T	C	T	C	M12593.metal.pos.txt.gz	IPF	0.0118	-0.028464	0.0769	0.07907	0.0026	0.03425	4.171e-06	0.4059	7314	953873	0.00280828	20.592
1687	rs2422370	A	G	A	G	M12593.metal.pos.txt.gz	IPF	-0.0084	-0.0045336	0.8094	0.7857	0.0018	0.029077	5.964e-06	0.8761	7314	887228	0.00296871	21.7718
1688	rs2705962	A	G	A	G	M12593.metal.pos.txt.gz	IPF	0.0078	0.0069361	0.8068	0.8054	0.0017	0.023855	4.625e-06	0.7712	7314	953873	0.00287004	21.0461
1689	rs6129758	T	G	T	G	M12593.metal.pos.txt.gz	IPF	0.0078	0.0058436	0.843	0.8537	0.0017	0.026602	7.879e-06	0.8261	7314	953873	0.00287004	21.0461
1690	rs6924754	A	G	A	G	M12593.metal.pos.txt.gz	IPF	0.0154	-0.040348	0.0606	0.09215	0.0034	0.032823	6.425e-06	0.219	7314	953873	0.00279713	20.51
1691	rs7068714	A	C	A	C	M12593.metal.pos.txt.gz	IPF	0.008	0.034388	0.1774	0.1943	0.0017	0.023865	2.966e-06	0.1496	7314	953873	0.00301866	22.1393
1692	rs7914384	T	C	T	C	M12593.metal.pos.txt.gz	IPF	-0.0082	0.04365	0.1806	0.1729	0.0017	0.024401	1.85e-06	0.07364	7314	953873	0.003171	23.2601
1693	rs8046494	A	G	A	G	M12593.metal.pos.txt.gz	IPF	0.0138	0.060595	0.9288	0.90919	0.003	0.033893	4.079e-06	0.0738	7314	953873	0.00288474	21.1542
1694	rs905508	T	C	T	C	M12593.metal.pos.txt.gz	IPF	0.0079	-0.02072	0.1655	0.1694	0.0017	0.025105	5.935e-06	0.4092	7314	953873	0.00294389	21.5893
1695	rs9396681	T	C	T	C	M12593.metal.pos.txt.gz	IPF	-0.012	0.053618	0.9072	0.8989	0.0024	0.036804	6.253e-07	0.1452	7314	887228	0.00340646	24.9932
1701	rs17150563	T	C	T	C	M12626.metal.pos.txt.gz	IPF	0.0117	-0.00026918	0.7256	0.7474	0.0026	0.021209	4.614e-06	0.9899	7258	953873	0.00278226	20.2444
1702	rs4978089	A	G	A	G	M12626.metal.pos.txt.gz	IPF	0.0117	-0.0073918	0.2125	0.2296	0.0026	0.022225	8.776e-06	0.7394	7258	953873	0.00278226	20.2444
1703	rs6904862	T	C	T	C	M12626.metal.pos.txt.gz	IPF	0.0115	0.030329	0.7427	0.7577	0.0026	0.025105	9.425e-06	0.227	7258	887228	0.00268821	19.5582
1704	rs7844733	T	C	T	C	M12626.metal.pos.txt.gz	IPF	-0.0126	0.048912	0.1881	0.1833	0.0027	0.024435	2.675e-06	0.04532	7258	953873	0.00299154	21.7718
1705	rs8105499	A	C	A	C	M12626.metal.pos.txt.gz	IPF	0.0123	-0.026847	0.2909	0.3044	0.0026	0.021748	1.567e-06	0.217	7258	903869	0.00307404	22.374
1711	rs10512645	A	G	A	G	M12768.metal.pos.txt.gz	IPF	-0.0121	0.0024333	0.6525	0.6398	0.0027	0.019749	5.524e-06	0.9019	7034	953873	0.0028471	20.078
1712	rs10787426	T	C	T	C	M12768.metal.pos.txt.gz	IPF	-0.0123	-0.0054133	0.4783	0.491	0.0026	0.020051	2.98e-06	0.7872	7034	903869	0.00317162	22.3738
1713	rs10945327	A	G	A	G	M12768.metal.pos.txt.gz	IPF	0.0124	-0.014491	0.6184	0.6214	0.0026	0.019282	2.317e-06	0.4523	7034	953873	0.00322324	22.7391
1714	rs11734331	A	G	A	G	M12768.metal.pos.txt.gz	IPF	-0.0119	-0.002296	0.3779	0.3893	0.0027	0.019102	7.813e-06	0.9043	7034	953873	0.00275402	19.4197
1715	rs12230393	A	C	A	C	M12768.metal.pos.txt.gz	IPF	-0.02	0.068551	0.9032	0.91356	0.0045	0.033266	7.417e-06	0.03934	7034	953873	0.00280037	19.7475
1716	rs12671954	A	G	A	G	M12768.metal.pos.txt.gz	IPF	-0.0118	0.028895	0.5605	0.5673	0.0026	0.023175	7.274e-06	0.2125	7034	571637	0.00291975	20.5918
1717	rs16985223	T	C	T	C	M12768.metal.pos.txt.gz	IPF	0.1077	-0.026626	0.9655	0.95525	0.0225	0.05258	1.689e-06	0.6126	1682	887228	0.0134389	22.8849
1718	rs1748947	T	G	T	G	M12768.metal.pos.txt.gz	IPF	-0.0264	-0.019271	0.9114	0.8756	0.0055	0.030497	1.373e-06	0.5275	7034	903869	0.00326482	23.0334
1719	rs3114834	T	C	T	C	M12768.metal.pos.txt.gz	IPF	0.0213	-0.0093963	0.1017	0.1325	0.0048	0.029192	9.856e-06	0.7475	7034	903869	0.00279165	19.6858
1720	rs4239564	A	G	A	G	M12768.metal.pos.txt.gz	IPF	-0.0155	-0.00027678	0.1652	0.1939	0.0035	0.024078	7.621e-06	0.9908	7034	953873	0.00278045	19.6067
1721	rs7127507	T	C	T	C	M12768.metal.pos.txt.gz	IPF	0.0122	-0.029544	0.6814	0.6706	0.0027	0.019947	4.946e-06	0.1386	7034	953873	0.00289422	20.4112
1727	rs10186957	T	C	T	C	M12774.metal.pos.txt.gz	IPF	-0.0124	-0.0088152	0.837	0.8397	0.0026	0.025335	2.419e-06	0.7279	7356	953873	0.00308258	22.7394
1728	rs10822248	T	C	T	C	M12774.metal.pos.txt.gz	IPF	-0.0136	0.018183	0.8488	0.8187	0.0026	0.025137	2.844e-07	0.4695	7356	953873	0.00370576	27.3535
1729	rs10899249	T	C	T	C	M12774.metal.pos.txt.gz	IPF	-0.0081	0.0074859	0.5316	0.4888	0.0018	0.018896	7.022e-06	0.692	7356	953873	0.0027453	20.2445
1730	rs12416136	A	C	A	C	M12774.metal.pos.txt.gz	IPF	-0.0082	0.0047906	0.4756	0.4858	0.0018	0.018688	3.435e-06	0.7977	7356	953873	0.00281331	20.7474
1731	rs1260326	T	C	T	C	M12774.metal.pos.txt.gz	IPF	0.0133	-0.0030237	0.4088	0.3825	0.0024	0.019156	1.827e-08	0.8746	7356	953873	0.00415748	30.7017
1732	rs1289240	T	C	T	C	M12774.metal.pos.txt.gz	IPF	-0.0084	-0.0066269	0.5712	0.5607	0.0018	0.020146	2.409e-06	0.7422	7356	903869	0.00295181	21.7719
1733	rs1929672	T	C	T	C	M12774.metal.pos.txt.gz	IPF	0.0087	0.033911	0.5201	0.5489	0.0018	0.020222	1.153e-06	0.09356	7356	903869	0.00316574	23.3548
1734	rs1930038	T	C	T	C	M12774.metal.pos.txt.gz	IPF	0.008	-0.0002797	0.5477	0.5658	0.0018	0.018838	7.294e-06	0.9882	7356	953873	0.00267811	19.7477
1735	rs2187375	A	G	A	G	M12774.metal.pos.txt.gz	IPF	-0.0221	-0.0094005	0.1651	0.176	0.0026	0.024978	2.649e-17	0.7067	7356	953873	0.00972638	72.2304
1736	rs2285943	T	G	T	G	M12774.metal.pos.txt.gz	IPF	0.0088	0.012721	0.4941	0.4806	0.0018	0.018673	7.599e-07	0.4957	7356	953873	0.00323869	23.8947
1737	rs2862982	A	G	A	G	M12774.metal.pos.txt.gz	IPF	-0.0149	-0.035604	0.8794	0.8829	0.0033	0.02891	5.005e-06	0.2181	7356	953873	0.00276376	20.3811
1738	rs2980872	A	G	A	G	M12774.metal.pos.txt.gz	IPF	-0.009	-0.015252	0.461	0.464	0.002	0.018995	6.795e-06	0.422	5595	953873	0.00360625	20.2428
1739	rs3219095	T	C	T	C	M12774.metal.pos.txt.gz	IPF	0.0117	0.019821	0.8471	0.8441	0.0026	0.025691	9.791e-06	0.4404	7356	953873	0.0027453	20.2445
1740	rs400839	T	C	T	C	M12774.metal.pos.txt.gz	IPF	-0.008	-0.037259	0.4443	0.4258	0.0018	0.020758	7.798e-06	0.07266	7356	903869	0.00267811	19.7477
1741	rs4236893	T	C	T	C	M12774.metal.pos.txt.gz	IPF	-0.0116	0.0093451	0.1865	0.2007	0.0025	0.023358	4.779e-06	0.6891	7356	953873	0.00291827	21.5237
1742	rs623068	A	C	A	C	M12774.metal.pos.txt.gz	IPF	0.0352	-0.014728	0.9375	0.9349	0.0079	0.0376	8.233e-06	0.6953	1761	953873	0.0111482	19.8307
1743	rs6679002	T	G	T	G	M12774.metal.pos.txt.gz	IPF	0.0141	-0.035842	0.5914	0.6067	0.0018	0.019083	2.16e-15	0.06035	7356	953873	0.00827263	61.3444
1744	rs716140	T	C	T	C	M12774.metal.pos.txt.gz	IPF	0.0079	-0.015709	0.4892	0.4952	0.0018	0.018637	8.304e-06	0.3993	7356	953873	0.00261175	19.2571
1745	rs7520876	A	G	A	G	M12774.metal.pos.txt.gz	IPF	0.044	-0.0070298	0.9879	0.97593	0.0094	0.068367	3.148e-06	0.9181	7356	937232	0.00296973	21.9044
1746	rs782378	A	G	A	G	M12774.metal.pos.txt.gz	IPF	-0.0089	-0.00047301	0.5252	0.5467	0.0018	0.018712	6.006e-07	0.9798	7356	953873	0.00331247	24.4409
1747	rs8025505	T	C	T	C	M12774.metal.pos.txt.gz	IPF	0.0116	0.036798	0.2344	0.2628	0.0026	0.021177	7.76e-06	0.08227	7356	953873	0.0026987	19.8999
1748	rs8078118	A	C	A	C	M12774.metal.pos.txt.gz	IPF	0.0085	0.0019499	0.4238	0.4221	0.0019	0.018901	6.982e-06	0.9178	7356	953873	0.00271337	20.0084
1749	rs964184	C	G	C	G	M12774.metal.pos.txt.gz	IPF	-0.0252	0.0091115	0.8617	0.8625	0.0032	0.027001	7.949e-15	0.7358	7356	953873	0.00836014	61.9988
1750	rs9855331	A	T	A	T	M12774.metal.pos.txt.gz	IPF	0.0147	0.0099907	0.7473	0.7196	0.0027	0.022244	3.809e-08	0.6533	7356	903869	0.00401346	29.6339
1751	rs988143	T	C	T	C	M12774.metal.pos.txt.gz	IPF	0.0081	-0.0053425	0.4828	0.4761	0.0018	0.020078	5.254e-06	0.7902	7356	903869	0.0027453	20.2445
1752	rs998933	T	C	T	C	M12774.metal.pos.txt.gz	IPF	0.0252	-0.02552	0.9528	0.95169	0.0051	0.042587	7.954e-07	0.549	7356	953873	0.00330811	24.4086
1758	rs10036528	A	G	A	G	M15122.metal.pos.txt.gz	IPF	-0.0209	0.029423	0.0757	0.09617	0.0043	0.032037	9.578e-07	0.3584	7352	953873	0.003203	23.6177
1759	rs10839972	T	G	T	G	M15122.metal.pos.txt.gz	IPF	0.0121	0.039137	0.1872	0.1972	0.0027	0.023661	7.908e-06	0.09811	7352	953873	0.00272429	20.0782
1760	rs13106354	A	T	A	T	M15122.metal.pos.txt.gz	IPF	-0.0127	-0.0034659	0.2123	0.2276	0.0027	0.022546	2.308e-06	0.8778	7352	953873	0.00300033	22.1188
1761	rs13216754	A	G	A	G	M15122.metal.pos.txt.gz	IPF	0.0555	0.098683	0.0117	0.01496	0.0105	0.074298	1.311e-07	0.1841	7352	953873	0.00378577	27.9312
1762	rs1614303	T	G	T	G	M15122.metal.pos.txt.gz	IPF	0.0138	0.0014742	0.8159	0.8253	0.0027	0.02586	2.401e-07	0.9545	7352	937232	0.00354066	26.1164
1763	rs2259038	A	G	A	G	M15122.metal.pos.txt.gz	IPF	-0.0216	0.0011361	0.203	0.03593	0.0048	0.050181	7.514e-06	0.9819	7352	953873	0.00274679	20.2445
1764	rs2501242	T	G	T	G	M15122.metal.pos.txt.gz	IPF	-0.0136	0.0071104	0.223	0.2536	0.0026	0.021697	1.841e-07	0.7431	7352	953873	0.00370777	27.3535
1765	rs2941840	A	G	A	G	M15122.metal.pos.txt.gz	IPF	0.0221	0.015736	0.0691	0.09677	0.0048	0.03395	3.709e-06	0.643	7352	903869	0.00287505	21.1926
1766	rs4436910	A	T	A	T	M15122.metal.pos.txt.gz	IPF	0.0118	-0.033286	0.8036	0.8044	0.0027	0.023474	9.126e-06	0.1562	7352	953873	0.00259122	19.0949
1767	rs5022234	A	C	A	C	M15122.metal.pos.txt.gz	IPF	0.0221	0.023537	0.6303	0.659	0.0047	0.019597	2.149e-06	0.2297	1757	953873	0.0124276	22.0848
1768	rs5759809	T	C	T	C	M15122.metal.pos.txt.gz	IPF	0.069	-0.049944	0.011	0.07704	0.015	0.039353	4.225e-06	0.2044	5595	903869	0.0037677	21.1524
1769	rs641939	A	G	A	G	M15122.metal.pos.txt.gz	IPF	0.0127	0.033358	0.7987	0.8016	0.0027	0.024876	2.128e-06	0.1799	7352	903869	0.00300033	22.1188
1770	rs806214	A	G	A	G	M15122.metal.pos.txt.gz	IPF	0.0123	-0.00065149	0.2175	0.2281	0.0026	0.022644	2.939e-06	0.977	7352	953873	0.00303486	22.3741
1771	rs9374302	A	G	A	G	M15122.metal.pos.txt.gz	IPF	-0.0141	-0.049689	0.1744	0.1636	0.0027	0.024963	1.716e-07	0.04654	7352	953873	0.0036957	27.2642
1772	rs9878149	A	G	A	G	M15122.metal.pos.txt.gz	IPF	0.0117	0.0058631	0.2674	0.2519	0.0026	0.02124	5.478e-06	0.7825	7352	953873	0.00274679	20.2445
1778	rs10085935	T	C	T	C	M15140.metal.pos.txt.gz	IPF	-0.0103	-0.041439	0.3782	0.3731	0.0017	0.019342	3.326e-09	0.03215	7368	953873	0.00495757	36.6994
1779	rs10857319	T	C	T	C	M15140.metal.pos.txt.gz	IPF	-0.0086	-0.004013	0.3481	0.3934	0.0017	0.019254	9.451e-07	0.8349	7368	953873	0.00346133	25.5847
1780	rs11057695	T	C	T	C	M15140.metal.pos.txt.gz	IPF	0.0206	-0.021199	0.0566	0.09302	0.0046	0.033524	8.027e-06	0.5271	7368	953873	0.00271449	20.0494
1781	rs11593042	A	T	A	T	M15140.metal.pos.txt.gz	IPF	0.0151	-0.015551	0.0919	0.08109	0.0033	0.034138	4.545e-06	0.6487	7368	953873	0.00283364	20.9319
1782	rs11646849	A	G	A	G	M15140.metal.pos.txt.gz	IPF	-0.0086	-0.01073	0.5005	0.5133	0.0017	0.018638	6.403e-07	0.5648	7368	953873	0.00346133	25.5847
1783	rs12490394	T	G	T	G	M15140.metal.pos.txt.gz	IPF	0.0084	0.027968	0.4967	0.5257	0.0019	0.018885	8.014e-06	0.1386	7368	953873	0.00264576	19.5404
1784	rs12802337	A	G	A	G	M15140.metal.pos.txt.gz	IPF	-0.0161	-0.030203	0.0776	0.0843	0.0036	0.033743	5.952e-06	0.3707	7368	953873	0.0027072	19.9953
1785	rs12937634	T	C	T	C	M15140.metal.pos.txt.gz	IPF	-0.0082	0.025998	0.5397	0.5303	0.0017	0.020055	2.279e-06	0.1949	7368	903869	0.00314783	23.2601
1786	rs1496635	A	C	A	C	M15140.metal.pos.txt.gz	IPF	-0.0091	0.020952	0.3407	0.3408	0.0018	0.021276	2.123e-07	0.3247	7368	903869	0.00345688	25.5517
1787	rs16924894	A	T	A	T	M15140.metal.pos.txt.gz	IPF	0.0814	-0.013346	0.024	0.02372	0.0146	0.059103	2.329e-08	0.8213	1764	953873	0.0173164	31.0492
1788	rs16974854	T	C	T	C	M15140.metal.pos.txt.gz	IPF	-0.0234	0.013433	0.038	0.04063	0.0048	0.046628	1.151e-06	0.7733	7368	953873	0.00321515	23.7592
1789	rs21327	A	G	A	G	M15140.metal.pos.txt.gz	IPF	0.0095	0.042136	0.286	0.2893	0.0018	0.022474	1.245e-07	0.06081	7368	882012	0.00376629	27.8474
1790	rs2320536	T	C	T	C	M15140.metal.pos.txt.gz	IPF	0.0081	0.026651	0.4131	0.4407	0.0017	0.0203	3.322e-06	0.1892	7368	903869	0.00307175	22.6963
1791	rs2375475	T	C	T	C	M15140.metal.pos.txt.gz	IPF	-0.0084	0.0020498	0.3236	0.3514	0.0017	0.019697	1.414e-06	0.9171	7368	953873	0.00330274	24.4086
1792	rs2491294	A	G	A	G	M15140.metal.pos.txt.gz	IPF	-0.01	0.006496	0.31	0.3298	0.002	0.021645	5.733e-07	0.7641	5604	903869	0.00444129	24.9911
1793	rs3789978	A	G	A	G	M15140.metal.pos.txt.gz	IPF	0.0123	-0.038923	0.8469	0.8372	0.0025	0.025411	1.318e-06	0.1256	7368	953873	0.00327458	24.1998
1794	rs3809198	A	C	A	C	M15140.metal.pos.txt.gz	IPF	0.0554	-0.010504	0.0199	0.01236	0.012	0.080559	4.281e-06	0.8963	1764	953873	0.0119383	21.2894
1795	rs4820242	A	G	A	G	M15140.metal.pos.txt.gz	IPF	-0.0085	0.014773	0.6201	0.5925	0.0017	0.019168	9.026e-07	0.4409	7368	953873	0.00338158	24.9932
1796	rs511797	A	C	A	C	M15140.metal.pos.txt.gz	IPF	0.012	0.032326	0.1261	0.1261	0.0026	0.028321	3.774e-06	0.2537	7368	953873	0.00288279	21.296
1797	rs6575634	T	C	T	C	M15140.metal.pos.txt.gz	IPF	-0.0158	0.0070995	0.6184	0.6265	0.0035	0.019345	4.845e-06	0.7136	1764	953873	0.0114207	20.3557
1798	rs669764	T	C	T	C	M15140.metal.pos.txt.gz	IPF	-0.0078	-0.027742	0.3176	0.3347	0.0018	0.019789	7.726e-06	0.161	7368	953873	0.00254208	18.7727
1799	rs6770323	T	C	T	C	M15140.metal.pos.txt.gz	IPF	-0.008	0.044095	0.4299	0.4433	0.0017	0.018854	3.331e-06	0.01935	7368	953873	0.0029966	22.1393
1800	rs7082839	T	G	T	G	M15140.metal.pos.txt.gz	IPF	-0.0079	0.0019794	0.3842	0.4062	0.0017	0.019003	5.023e-06	0.917	7368	953873	0.00292237	21.5893
1801	rs7548008	A	G	A	G	M15140.metal.pos.txt.gz	IPF	0.016	0.0096637	0.504	0.5216	0.0035	0.018623	3.564e-06	0.6038	1764	953873	0.0117082	20.8743
1802	rs759507	T	C	T	C	M15140.metal.pos.txt.gz	IPF	0.008	0.046725	0.366	0.3555	0.0018	0.021194	5.176e-06	0.02748	7368	903869	0.00267376	19.7477
1803	rs7619568	A	G	A	G	M15140.metal.pos.txt.gz	IPF	0.0177	0.013709	0.94	0.93411	0.004	0.038218	9.527e-06	0.7198	7368	953873	0.00265048	19.5753
1804	rs8051149	A	G	A	G	M15140.metal.pos.txt.gz	IPF	0.0258	-0.02894	0.2127	0.2552	0.0025	0.021348	9.073e-26	0.1752	7368	953873	0.0142488	106.473
1805	rs9533582	A	G	A	G	M15140.metal.pos.txt.gz	IPF	-0.0222	0.048516	0.0351	0.04514	0.005	0.044577	9.996e-06	0.2764	7368	953873	0.00266843	19.7082
1806	rs9857268	A	G	A	G	M15140.metal.pos.txt.gz	IPF	0.008	0.0046415	0.411	0.4114	0.0017	0.018937	3.072e-06	0.8064	7368	953873	0.0029966	22.1393
1812	rs10017961	A	G	A	G	M15335.metal.pos.txt.gz	IPF	0.0486	0.03124	0.2731	0.2843	0.0107	0.022739	5.618e-06	0.1695	5606	903869	0.00366654	20.6229
1813	rs11487092	A	G	A	G	M15335.metal.pos.txt.gz	IPF	0.248	-0.00037314	0.012	0.00721	0.053	0.10117	2.879e-06	0.9971	4084	903869	0.00533266	21.8846
1814	rs16967757	T	C	T	C	M15335.metal.pos.txt.gz	IPF	0.0495	0.014539	0.3037	0.2933	0.0103	0.020426	1.428e-06	0.4766	5606	953873	0.00410296	23.0877
1815	rs1998053	A	G	A	G	M15335.metal.pos.txt.gz	IPF	0.0724	-0.053944	0.0855	0.0958	0.0159	0.033371	5.604e-06	0.106	5606	953873	0.00368491	20.7266
1816	rs2365522	A	C	A	C	M15335.metal.pos.txt.gz	IPF	0.0442	0.010055	0.7137	0.7317	0.0098	0.022283	6.702e-06	0.6518	5606	903869	0.00361548	20.3347
1817	rs4404993	T	G	T	G	M15335.metal.pos.txt.gz	IPF	0.0964	0.008607	0.1848	0.2133	0.0207	0.024732	3.215e-06	0.7278	1522	903869	0.0140493	21.6592
1818	rs488225	A	G	A	G	M15335.metal.pos.txt.gz	IPF	-0.0411	-0.023265	0.3902	0.3848	0.009	0.019149	4.874e-06	0.2244	5606	953873	0.00370623	20.847
1819	rs4917405	T	C	T	C	M15335.metal.pos.txt.gz	IPF	0.0972	-0.031537	0.0437	0.0462	0.0215	0.043615	6.283e-06	0.4696	5606	953873	0.00363264	20.4315
1820	rs6434811	T	C	T	C	M15335.metal.pos.txt.gz	IPF	-0.0785	0.0053578	0.9256	0.9041	0.0169	0.031982	3.524e-06	0.867	5606	953873	0.00383393	21.5681
1821	rs6657899	T	G	T	G	M15335.metal.pos.txt.gz	IPF	0.1908	0.013593	0.0322	0.01949	0.0427	0.06301	7.957e-06	0.8292	1522	953873	0.0129487	19.9402
1822	rs7184992	T	C	T	C	M15335.metal.pos.txt.gz	IPF	0.0807	0.014385	0.3003	0.3096	0.0167	0.021617	1.312e-06	0.5058	1522	903869	0.0151108	23.3208
1823	rs7240261	T	C	T	C	M15335.metal.pos.txt.gz	IPF	0.0565	-0.0074716	0.562	0.5403	0.0126	0.022213	7.524e-06	0.7366	5606	887228	0.00357394	20.1002
1829	rs11020587	A	G	A	G	M15365.metal.pos.txt.gz	IPF	-0.0362	-0.040778	0.9798	0.9765	0.008	0.065226	7.02e-06	0.5318	7337	937232	0.00278297	20.47
1830	rs11062138	A	G	A	G	M15365.metal.pos.txt.gz	IPF	0.0131	-0.028901	0.1724	0.1986	0.0027	0.026016	1.46e-06	0.2666	7337	903869	0.0031982	23.534
1831	rs1159317	C	G	C	G	M15365.metal.pos.txt.gz	IPF	-0.0149	-0.015034	0.2439	0.2711	0.0034	0.023391	9.272e-06	0.5204	7337	903869	0.00261072	19.1998
1832	rs13120638	T	G	T	G	M15365.metal.pos.txt.gz	IPF	0.0443	0.026015	0.9213	0.9276	0.0096	0.038584	3.958e-06	0.5002	1760	903869	0.0119544	21.2702
1833	rs1813982	T	C	T	C	M15365.metal.pos.txt.gz	IPF	-0.0122	0.014901	0.2209	0.22	0.0027	0.022451	6.59e-06	0.5069	7337	953873	0.00277502	20.4114
1834	rs2517897	A	C	A	C	M15365.metal.pos.txt.gz	IPF	0.0171	-0.029703	0.1141	0.1523	0.0035	0.025768	1.232e-06	0.249	7337	953873	0.00324285	23.8637
1835	rs333383	A	G	A	G	M15365.metal.pos.txt.gz	IPF	-0.0127	0.0031518	0.8384	0.8396	0.0027	0.02526	3.384e-06	0.9007	7337	953873	0.00300645	22.1188
1836	rs4075155	T	C	T	C	M15365.metal.pos.txt.gz	IPF	-0.012	0.0023247	0.7961	0.7551	0.0027	0.021951	8.879e-06	0.9157	7337	953873	0.00268503	19.7477
1837	rs4816048	C	G	C	G	M15365.metal.pos.txt.gz	IPF	0.0123	-0.008876	0.1794	0.2022	0.0027	0.023453	7.131e-06	0.7051	7337	953873	0.00282057	20.7474
1838	rs6130362	C	G	C	G	M15365.metal.pos.txt.gz	IPF	0.0124	-0.0084199	0.2071	0.2101	0.0027	0.024314	5.617e-06	0.7291	7337	903869	0.00286649	21.0862
1839	rs7813124	A	T	A	T	M15365.metal.pos.txt.gz	IPF	-0.0433	-0.11113	0.9866	0.98151	0.0098	0.075015	9.412e-06	0.1385	7337	903869	0.0026537	19.5166
1840	rs7867387	A	G	A	G	M15365.metal.pos.txt.gz	IPF	0.0167	0.024943	0.9051	0.92028	0.0036	0.032898	4.16e-06	0.4483	7337	953873	0.0029244	21.5134
1841	rs874758	A	G	A	G	M15365.metal.pos.txt.gz	IPF	-0.0134	0.01455	0.1855	0.1778	0.0028	0.025539	1.433e-06	0.5689	7337	903869	0.00311187	22.8968
1847	rs10490240	A	G	A	G	M15488.metal.pos.txt.gz	IPF	0.0078	-0.009455	0.8318	0.8463	0.0017	0.025202	5.172e-06	0.7075	7345	953873	0.00285796	21.0462
1848	rs10933558	A	G	A	G	M15488.metal.pos.txt.gz	IPF	-0.0074	-0.014737	0.794	0.8009	0.0017	0.023193	9.254e-06	0.5251	7345	953873	0.00257309	18.9429
1849	rs11539202	A	G	A	G	M15488.metal.pos.txt.gz	IPF	-0.007	0.028468	0.6685	0.6915	0.0016	0.020129	9.773e-06	0.1573	7345	953873	0.00259917	19.1354
1850	rs11843722	T	C	T	C	M15488.metal.pos.txt.gz	IPF	0.019	0.0071689	0.9644	0.95886	0.0039	0.046169	9.473e-07	0.8766	7345	953873	0.00322096	23.7279
1851	rs12119234	T	C	T	C	M15488.metal.pos.txt.gz	IPF	0.0095	-0.000968	0.2374	0.2329	0.0018	0.022195	7.106e-08	0.9652	7345	953873	0.00377804	27.8474
1852	rs2044899	A	C	A	C	M15488.metal.pos.txt.gz	IPF	0.0074	-0.0012363	0.3787	0.3686	0.0016	0.019443	3.537e-06	0.9493	7345	953873	0.00290381	21.3848
1853	rs2799635	T	C	T	C	M15488.metal.pos.txt.gz	IPF	0.0089	0.014506	0.3644	0.3644	0.0016	0.022936	1.96e-08	0.5271	7345	739218	0.00419491	30.933
1854	rs3904667	A	T	A	T	M15488.metal.pos.txt.gz	IPF	-0.0078	-0.01203	0.2059	0.1933	0.0017	0.023436	3.196e-06	0.6077	7345	953873	0.00285796	21.0462
1855	rs4970834	T	C	T	C	M15488.metal.pos.txt.gz	IPF	-0.0098	-0.0023638	0.1821	0.1943	0.0017	0.023918	1.06e-08	0.9213	7345	953873	0.00450404	33.2228
1856	rs6455128	A	C	A	C	M15488.metal.pos.txt.gz	IPF	0.0081	-0.035694	0.1757	0.1521	0.0017	0.027176	2.208e-06	0.189	7345	903869	0.00308134	22.6962
1857	rs7288834	T	G	T	G	M15488.metal.pos.txt.gz	IPF	-0.0083	-0.02086	0.3986	0.4775	0.0016	0.020525	1.506e-07	0.3095	7345	903869	0.00365036	26.9028
1858	rs9572809	A	C	A	C	M15488.metal.pos.txt.gz	IPF	-0.0223	-0.020613	0.97	0.95072	0.005	0.047643	9.996e-06	0.6653	7345	903869	0.00270087	19.8862
1859	rs9811522	A	G	A	G	M15488.metal.pos.txt.gz	IPF	0.01	0.026519	0.174	0.1783	0.002	0.024543	5.733e-07	0.2799	5583	953873	0.00445792	24.991
1860	rs9818690	T	C	T	C	M15488.metal.pos.txt.gz	IPF	0.0071	-0.011937	0.6477	0.6605	0.0016	0.021227	7.068e-06	0.5739	7345	903869	0.00267376	19.686
1861	rs9998852	A	G	A	G	M15488.metal.pos.txt.gz	IPF	0.0076	-0.0075615	0.6611	0.6724	0.0016	0.019679	2.768e-06	0.7008	7345	953873	0.00306241	22.5564
1867	rs10111368	A	G	A	G	M15500.metal.pos.txt.gz	IPF	-0.0041	-0.031357	0.5456	0.5112	0.0009	0.020166	4.982e-06	0.12	7349	903869	0.00281598	20.7474
1868	rs10130689	T	C	T	C	M15500.metal.pos.txt.gz	IPF	-0.0075	0.0054398	0.1587	0.1631	0.0017	0.025213	4.991e-06	0.8292	7349	953873	0.00264148	19.4584
1869	rs10275028	T	C	T	C	M15500.metal.pos.txt.gz	IPF	0.0046	-0.00055919	0.6522	0.6642	0.0009	0.01969	4.9e-07	0.9773	7349	953873	0.0035421	26.1163
1870	rs1028981	A	G	A	G	M15500.metal.pos.txt.gz	IPF	-0.005	-0.0075041	0.385	0.373	0.001	0.019188	5.733e-07	0.6957	5590	953873	0.00445236	24.9911
1871	rs10481187	T	G	T	G	M15500.metal.pos.txt.gz	IPF	0.0045	0.0054132	0.3707	0.3696	0.0009	0.019474	9.685e-07	0.781	7349	953873	0.00339029	24.9932
1872	rs10784558	T	C	T	C	M15500.metal.pos.txt.gz	IPF	-0.0048	0.0045479	0.4845	0.4507	0.0009	0.018751	1.062e-07	0.8084	7349	953873	0.0038556	28.4367
1873	rs10789970	T	C	T	C	M15500.metal.pos.txt.gz	IPF	-0.0041	0.030137	0.4061	0.4174	0.0009	0.018891	6.632e-06	0.1106	7349	953873	0.00281598	20.7474
1874	rs10818924	T	C	T	C	M15500.metal.pos.txt.gz	IPF	-0.0045	0.0039358	0.6254	0.6499	0.0009	0.019504	6.077e-07	0.8401	7349	953873	0.00339029	24.9932
1875	rs10820588	T	G	T	G	M15500.metal.pos.txt.gz	IPF	0.0048	-0.028284	0.5616	0.5519	0.0009	0.020125	1.636e-07	0.1599	7349	903869	0.0038556	28.4367
1876	rs10821585	A	G	A	G	M15500.metal.pos.txt.gz	IPF	-0.0086	0.023108	0.4124	0.4197	0.0009	0.01893	1.277e-21	0.2222	7349	953873	0.0122722	91.2838
1877	rs10869018	T	C	T	C	M15500.metal.pos.txt.gz	IPF	-0.0041	0.0042619	0.5113	0.5389	0.0009	0.018818	5.196e-06	0.8208	7349	953873	0.00281598	20.7474
1878	rs10875102	A	G	A	G	M15500.metal.pos.txt.gz	IPF	-0.0042	-0.015404	0.5422	0.4915	0.0009	0.020513	4.633e-06	0.4527	7349	903869	0.00295461	21.7719
1879	rs10920115	T	G	T	G	M15500.metal.pos.txt.gz	IPF	0.0044	-0.019354	0.5507	0.5514	0.0009	0.020956	1.638e-06	0.3557	7349	903869	0.00324177	23.8947
1880	rs11085914	T	G	T	G	M15500.metal.pos.txt.gz	IPF	-0.0042	0.016687	0.5541	0.5432	0.0009	0.018713	2.878e-06	0.3725	7349	953873	0.00295461	21.7719
1881	rs1109773	C	G	C	G	M15500.metal.pos.txt.gz	IPF	0.004	0.040145	0.3724	0.3796	0.0009	0.0205	9.026e-06	0.05019	7349	903869	0.00268066	19.7477
1882	rs1114130	T	C	T	C	M15500.metal.pos.txt.gz	IPF	-0.0042	0.0016091	0.3401	0.3541	0.0009	0.019458	4.284e-06	0.9341	7349	953873	0.00295461	21.7719
1883	rs11183620	A	G	A	G	M15500.metal.pos.txt.gz	IPF	0.005	0.031798	0.4676	0.4342	0.0009	0.020054	3.003e-08	0.1128	7349	937232	0.00418222	30.8558
1884	rs11223211	A	G	A	G	M15500.metal.pos.txt.gz	IPF	0.0047	0.0085794	0.4713	0.5052	0.0009	0.018803	1.712e-07	0.6482	7349	953873	0.00369721	27.2642
1885	rs11589858	T	G	T	G	M15500.metal.pos.txt.gz	IPF	-0.0041	-0.0098196	0.3573	0.3694	0.0009	0.019431	5.262e-06	0.6133	7349	953873	0.00281598	20.7474
1886	rs11620955	A	G	A	G	M15500.metal.pos.txt.gz	IPF	-0.0051	-0.023582	0.4767	0.4682	0.0009	0.018736	1.632e-08	0.2082	7349	953873	0.00435044	32.1024
1887	rs11620973	A	G	A	G	M15500.metal.pos.txt.gz	IPF	-0.0051	0.016842	0.6326	0.643	0.0009	0.020918	2.346e-08	0.4207	7349	903869	0.00435044	32.1024
1888	rs11630130	A	G	A	G	M15500.metal.pos.txt.gz	IPF	0.0092	-0.020892	0.1395	0.1498	0.002	0.025775	5.781e-06	0.4176	7349	953873	0.00287104	21.1542
1889	rs11915024	T	G	T	G	M15500.metal.pos.txt.gz	IPF	-0.0044	-0.0013003	0.402	0.4326	0.0009	0.018864	9.59e-07	0.945	7349	953873	0.00324177	23.8947
1890	rs12201109	A	G	A	G	M15500.metal.pos.txt.gz	IPF	-0.0045	-0.029022	0.3703	0.393	0.0009	0.019427	1.141e-06	0.1352	7349	953873	0.00339029	24.9932
1891	rs12245254	T	C	T	C	M15500.metal.pos.txt.gz	IPF	0.0043	-0.016816	0.4414	0.4208	0.0009	0.020188	1.916e-06	0.4049	7349	903869	0.00309654	22.8209
1892	rs12246131	A	T	A	T	M15500.metal.pos.txt.gz	IPF	0.008	0.017471	0.778	0.7483	0.0015	0.021577	2.408e-07	0.4181	7349	953873	0.0038556	28.4367
1893	rs1225019	A	G	A	G	M15500.metal.pos.txt.gz	IPF	-0.0043	-0.011983	0.5791	0.5905	0.0009	0.018959	1.588e-06	0.5274	7349	953873	0.00309654	22.8209
1894	rs12356193	A	G	A	G	M15500.metal.pos.txt.gz	IPF	0.0274	-0.019544	0.8362	0.8585	0.0016	0.025962	3.686e-63	0.4516	7349	953873	0.0383742	293.186
1895	rs1246267	A	G	A	G	M15500.metal.pos.txt.gz	IPF	0.0045	-0.013706	0.591	0.5761	0.0009	0.018964	1.087e-06	0.4698	7349	953873	0.00339029	24.9932
1896	rs12484	T	C	T	C	M15500.metal.pos.txt.gz	IPF	-0.005	-0.0066636	0.427	0.4161	0.001	0.018874	5.733e-07	0.7241	5590	953873	0.00445236	24.9911
1897	rs12510909	T	C	T	C	M15500.metal.pos.txt.gz	IPF	-0.0043	0.020161	0.5338	0.5246	0.0009	0.018695	1.836e-06	0.2809	7349	953873	0.00309654	22.8209
1898	rs12709393	T	G	T	G	M15500.metal.pos.txt.gz	IPF	0.0053	-0.0041739	0.6286	0.6284	0.0009	0.020776	6.408e-09	0.8408	7349	903869	0.00469671	34.6696
1899	rs13162168	A	G	A	G	M15500.metal.pos.txt.gz	IPF	-0.0041	0.021062	0.3813	0.3661	0.0009	0.019404	6.37e-06	0.2777	7349	953873	0.00281598	20.7474
1900	rs13231650	T	C	T	C	M15500.metal.pos.txt.gz	IPF	0.0041	0.003309	0.4296	0.4244	0.0009	0.018799	4.778e-06	0.8603	7349	953873	0.00281598	20.7474
1901	rs13284789	T	C	T	C	M15500.metal.pos.txt.gz	IPF	0.0079	0.00014663	0.1397	0.1736	0.0018	0.0274	9.193e-06	0.9957	7349	903869	0.00261423	19.2571
1902	rs140572	A	C	A	C	M15500.metal.pos.txt.gz	IPF	0.0047	-0.044757	0.5115	0.5149	0.0009	0.020329	2.185e-07	0.02769	7349	903869	0.00369721	27.2642
1903	rs1424937	A	G	A	G	M15500.metal.pos.txt.gz	IPF	0.0042	0.0002561	0.4576	0.4711	0.0009	0.018672	2.316e-06	0.9891	7349	953873	0.00295461	21.7719
1904	rs1446555	A	C	A	C	M15500.metal.pos.txt.gz	IPF	0.008	-0.02459	0.9028	0.90703	0.0017	0.03122	3.212e-06	0.4309	7349	953873	0.00300433	22.1393
1905	rs1449844	C	G	C	G	M15500.metal.pos.txt.gz	IPF	-0.0048	0.018555	0.4023	0.4164	0.0009	0.018919	9.23e-08	0.3267	7349	953873	0.0038556	28.4367
1906	rs1466788	A	G	A	G	M15500.metal.pos.txt.gz	IPF	-0.0074	-0.0071424	0.4068	0.4019	0.0009	0.020387	3.053e-16	0.7261	7349	903869	0.00911535	67.5865
1907	rs1479614	A	G	A	G	M15500.metal.pos.txt.gz	IPF	-0.0048	-0.027043	0.6092	0.6015	0.0009	0.019084	9.928e-08	0.1565	7349	953873	0.0038556	28.4367
1908	rs1507101	A	G	A	G	M15500.metal.pos.txt.gz	IPF	0.004	0.01226	0.5673	0.5535	0.0009	0.020219	9.625e-06	0.5443	7349	903869	0.00268066	19.7477
1909	rs1544412	T	C	T	C	M15500.metal.pos.txt.gz	IPF	-0.0043	-0.0031707	0.3552	0.3782	0.0009	0.01934	2.679e-06	0.8698	7349	953873	0.00309654	22.8209
1910	rs17370344	A	C	A	C	M15500.metal.pos.txt.gz	IPF	-0.0047	0.015159	0.6374	0.6572	0.0009	0.021134	1.659e-07	0.4732	7349	903869	0.00369721	27.2642
1911	rs1760903	A	G	A	G	M15500.metal.pos.txt.gz	IPF	-0.0045	0.012788	0.4432	0.4445	0.0009	0.018761	1.005e-06	0.4955	7349	953873	0.00339029	24.9932
1912	rs1812126	T	C	T	C	M15500.metal.pos.txt.gz	IPF	-0.0042	0.0038508	0.4696	0.4549	0.0009	0.018732	3.047e-06	0.8371	7349	953873	0.00295461	21.7719
1913	rs1929425	T	C	T	C	M15500.metal.pos.txt.gz	IPF	0.0043	0.038228	0.3937	0.4275	0.0009	0.020224	2.077e-06	0.05872	7349	903869	0.00309654	22.8209
1914	rs1936602	T	C	T	C	M15500.metal.pos.txt.gz	IPF	0.0043	-0.012602	0.4194	0.4212	0.0009	0.018875	2.527e-06	0.5044	7349	953873	0.00309654	22.8209
1915	rs2000364	T	G	T	G	M15500.metal.pos.txt.gz	IPF	0.0041	0.034833	0.6346	0.5881	0.0009	0.019361	5.716e-06	0.07199	7349	953873	0.00281598	20.7474
1916	rs2114713	T	G	T	G	M15500.metal.pos.txt.gz	IPF	-0.005	-0.027246	0.58	0.5763	0.0009	0.018828	2.665e-08	0.1479	7349	953873	0.00418222	30.8558
1917	rs2130882	T	C	T	C	M15500.metal.pos.txt.gz	IPF	0.0044	0.0038293	0.4864	0.5028	0.0009	0.018779	1.108e-06	0.8384	7349	953873	0.00324177	23.8947
1918	rs2133813	T	C	T	C	M15500.metal.pos.txt.gz	IPF	0.0041	-0.011505	0.4438	0.4512	0.0009	0.018745	9.469e-06	0.5394	7349	953873	0.00281598	20.7474
1919	rs2170082	A	G	A	G	M15500.metal.pos.txt.gz	IPF	-0.0047	0.011623	0.5174	0.4986	0.0009	0.018732	2.159e-07	0.5349	7349	953873	0.00369721	27.2642
1920	rs2279014	T	C	T	C	M15500.metal.pos.txt.gz	IPF	-0.005	-0.001462	0.367	0.3522	0.0009	0.020904	4.863e-08	0.9442	7349	903869	0.00418222	30.8558
1921	rs2286460	A	G	A	G	M15500.metal.pos.txt.gz	IPF	-0.0045	-0.0052593	0.5399	0.5302	0.0009	0.018668	8.359e-07	0.7782	7349	953873	0.00339029	24.9932
1922	rs2327855	A	C	A	C	M15500.metal.pos.txt.gz	IPF	0.004	0.033349	0.5796	0.586	0.0009	0.018901	9.553e-06	0.07767	7349	953873	0.00268066	19.7477
1923	rs2362839	A	G	A	G	M15500.metal.pos.txt.gz	IPF	-0.0041	0.0090116	0.5974	0.5908	0.0009	0.01897	5.149e-06	0.6348	7349	953873	0.00281598	20.7474
1924	rs2396004	A	G	A	G	M15500.metal.pos.txt.gz	IPF	0.0049	-0.03535	0.4389	0.4228	0.0009	0.018919	4.315e-08	0.0617	7349	953873	0.00401727	29.6339
1925	rs2451996	A	G	A	G	M15500.metal.pos.txt.gz	IPF	0.0043	-0.0027256	0.5799	0.5711	0.0009	0.022083	1.666e-06	0.9018	7349	887228	0.00309654	22.8209
1926	rs2492788	T	C	T	C	M15500.metal.pos.txt.gz	IPF	0.0049	0.040769	0.5457	0.5379	0.0009	0.018727	4.58e-08	0.02948	7349	953873	0.00401727	29.6339
1927	rs2504927	T	C	T	C	M15500.metal.pos.txt.gz	IPF	-0.0041	-0.0059112	0.4387	0.4366	0.0009	0.01886	4.349e-06	0.754	7349	953873	0.00281598	20.7474
1928	rs2508305	T	C	T	C	M15500.metal.pos.txt.gz	IPF	-0.0079	0.037697	0.8912	0.8901	0.0017	0.0294	4.051e-06	0.1998	7349	953873	0.00292991	21.5893
1929	rs2544371	A	G	A	G	M15500.metal.pos.txt.gz	IPF	0.004	0.0028765	0.5575	0.5638	0.0009	0.018773	8.693e-06	0.8782	7349	953873	0.00268066	19.7477
1930	rs2577264	A	G	A	G	M15500.metal.pos.txt.gz	IPF	0.0043	-0.029167	0.3826	0.3839	0.0009	0.020648	2.123e-06	0.1578	7349	903869	0.00309654	22.8209
1931	rs2595993	A	C	A	C	M15500.metal.pos.txt.gz	IPF	-0.0042	0.012732	0.4967	0.5019	0.0009	0.018631	2.877e-06	0.4944	7349	953873	0.00295461	21.7719
1932	rs262273	C	G	C	G	M15500.metal.pos.txt.gz	IPF	-0.0042	0.050717	0.3946	0.384	0.0009	0.019106	2.755e-06	0.007944	7349	953873	0.00295461	21.7719
1933	rs2789599	A	G	A	G	M15500.metal.pos.txt.gz	IPF	0.0043	-0.017702	0.5029	0.4869	0.0009	0.018664	2.163e-06	0.3429	7349	953873	0.00309654	22.8209
1934	rs2793471	T	C	T	C	M15500.metal.pos.txt.gz	IPF	0.0041	0.033714	0.5669	0.5541	0.0009	0.02016	7.225e-06	0.09447	7349	903869	0.00281598	20.7474
1935	rs288332	A	G	A	G	M15500.metal.pos.txt.gz	IPF	-0.0043	0.006697	0.6294	0.6301	0.0009	0.019517	1.833e-06	0.7315	7349	953873	0.00309654	22.8209
1936	rs294280	T	C	T	C	M15500.metal.pos.txt.gz	IPF	0.0042	0.015049	0.3901	0.3793	0.0009	0.020539	3.432e-06	0.4637	7349	903869	0.00295461	21.7719
1937	rs2961253	T	C	T	C	M15500.metal.pos.txt.gz	IPF	-0.005	0.027918	0.55	0.5326	0.001	0.020005	5.733e-07	0.1628	5590	903869	0.00445236	24.9911
1938	rs2962321	T	C	T	C	M15500.metal.pos.txt.gz	IPF	-0.0077	-0.045983	0.8968	0.9162	0.0017	0.036719	6.011e-06	0.2105	7349	903869	0.00278384	20.51
1939	rs3127274	T	C	T	C	M15500.metal.pos.txt.gz	IPF	0.0043	0.029658	0.4172	0.4212	0.0009	0.018859	2.09e-06	0.1158	7349	953873	0.00309654	22.8209
1940	rs3736438	T	G	T	G	M15500.metal.pos.txt.gz	IPF	-0.0057	0.022924	0.3889	0.4035	0.0009	0.019121	3.186e-10	0.2305	7349	953873	0.00542841	40.1002
1941	rs378999	T	C	T	C	M15500.metal.pos.txt.gz	IPF	-0.0044	-0.019524	0.6369	0.6259	0.0009	0.019444	1.2e-06	0.3153	7349	953873	0.00324177	23.8947
1942	rs4284335	A	G	A	G	M15500.metal.pos.txt.gz	IPF	-0.0046	0.022878	0.4121	0.3863	0.0009	0.019146	3.534e-07	0.2321	7349	953873	0.0035421	26.1163
1943	rs4436868	T	C	T	C	M15500.metal.pos.txt.gz	IPF	0.0045	-0.010725	0.4973	0.4975	0.0009	0.01871	4.29e-07	0.5665	7349	953873	0.00339029	24.9932
1944	rs4504898	T	C	T	C	M15500.metal.pos.txt.gz	IPF	-0.0041	-0.003236	0.3869	0.376	0.0009	0.019273	7.026e-06	0.8667	7349	953873	0.00281598	20.7474
1945	rs4531372	A	G	A	G	M15500.metal.pos.txt.gz	IPF	-0.0045	0.0020366	0.4345	0.415	0.0009	0.020317	7.129e-07	0.9202	7349	903869	0.00339029	24.9932
1946	rs4633738	A	C	A	C	M15500.metal.pos.txt.gz	IPF	0.0041	-0.015286	0.4809	0.4842	0.0009	0.018751	5.382e-06	0.4149	7349	953873	0.00281598	20.7474
1947	rs4634560	T	C	T	C	M15500.metal.pos.txt.gz	IPF	-0.009	0.041432	0.906	0.8948	0.002	0.030786	6.795e-06	0.1784	5590	953873	0.00360946	20.2428
1948	rs4665406	T	C	T	C	M15500.metal.pos.txt.gz	IPF	-0.0043	-0.0075635	0.3652	0.3982	0.0009	0.020649	1.938e-06	0.7141	7349	903869	0.00309654	22.8209
1949	rs4669392	A	G	A	G	M15500.metal.pos.txt.gz	IPF	-0.004	-0.0059878	0.4262	0.4487	0.0009	0.020292	9.293e-06	0.7679	7349	903869	0.00268066	19.7477
1950	rs4672450	T	C	T	C	M15500.metal.pos.txt.gz	IPF	0.0044	0.012503	0.4757	0.5122	0.0009	0.018934	1.355e-06	0.509	7349	953873	0.00324177	23.8947
1951	rs4713396	A	C	A	C	M15500.metal.pos.txt.gz	IPF	-0.0044	0.014889	0.4478	0.5096	0.0009	0.018862	1.154e-06	0.4299	7349	953873	0.00324177	23.8947
1952	rs4722438	A	G	A	G	M15500.metal.pos.txt.gz	IPF	0.0044	0.0043415	0.4414	0.4666	0.0009	0.018762	1.16e-06	0.817	7349	953873	0.00324177	23.8947
1953	rs4764292	T	C	T	C	M15500.metal.pos.txt.gz	IPF	0.0044	-0.0071468	0.5797	0.5915	0.0009	0.018968	9.759e-07	0.7063	7349	953873	0.00324177	23.8947
1954	rs4811828	T	C	T	C	M15500.metal.pos.txt.gz	IPF	0.0077	-0.0060981	0.8787	0.8891	0.0017	0.029044	5.887e-06	0.8337	7349	953873	0.00278384	20.51
1955	rs4860022	T	C	T	C	M15500.metal.pos.txt.gz	IPF	-0.0055	-0.0065357	0.3362	0.3583	0.0009	0.021033	9.602e-10	0.756	7349	903869	0.00505604	37.3355
1956	rs4881523	T	C	T	C	M15500.metal.pos.txt.gz	IPF	0.0045	-0.0065183	0.5372	0.5616	0.0009	0.018863	5.953e-07	0.7297	7349	953873	0.00339029	24.9932
1957	rs4888504	T	C	T	C	M15500.metal.pos.txt.gz	IPF	0.0046	0.040917	0.4223	0.4061	0.0009	0.018901	2.675e-07	0.0304	7349	953873	0.0035421	26.1163
1958	rs4940563	A	G	A	G	M15500.metal.pos.txt.gz	IPF	-0.005	-0.012852	0.526	0.5306	0.001	0.020746	5.733e-07	0.5356	5590	903869	0.00445236	24.9911
1959	rs496150	A	G	A	G	M15500.metal.pos.txt.gz	IPF	-0.004	-0.028449	0.6256	0.5918	0.0009	0.019155	9.878e-06	0.1375	7349	953873	0.00268066	19.7477
1960	rs6471514	T	C	T	C	M15500.metal.pos.txt.gz	IPF	-0.0042	0.008637	0.5379	0.5365	0.0009	0.018768	2.734e-06	0.6454	7349	953873	0.00295461	21.7719
1961	rs6535870	T	C	T	C	M15500.metal.pos.txt.gz	IPF	-0.005	-0.05364	0.6539	0.6775	0.0009	0.021232	5.498e-08	0.01152	7349	903869	0.00418222	30.8558
1962	rs6554156	T	C	T	C	M15500.metal.pos.txt.gz	IPF	0.0044	0.0014519	0.4037	0.4115	0.0009	0.020334	1.117e-06	0.9431	7349	903869	0.00324177	23.8947
1963	rs6596361	T	C	T	C	M15500.metal.pos.txt.gz	IPF	0.0044	0.01945	0.5945	0.5617	0.0009	0.018936	9.191e-07	0.3043	7349	953873	0.00324177	23.8947
1964	rs6602640	T	G	T	G	M15500.metal.pos.txt.gz	IPF	0.008	-0.0074484	0.8847	0.8857	0.0017	0.029209	2.498e-06	0.7987	7349	953873	0.00300433	22.1393
1965	rs6709816	A	G	A	G	M15500.metal.pos.txt.gz	IPF	-0.0077	0.006265	0.1494	0.1527	0.0016	0.0278	1.855e-06	0.8217	7349	903869	0.00314157	23.1539
1966	rs6793266	T	C	T	C	M15500.metal.pos.txt.gz	IPF	-0.0043	-0.050084	0.3866	0.4134	0.0009	0.02021	2.921e-06	0.0132	7349	937232	0.00309654	22.8209
1967	rs6852374	A	G	A	G	M15500.metal.pos.txt.gz	IPF	0.0041	0.022176	0.5054	0.5378	0.0009	0.019949	4.441e-06	0.2663	7349	903869	0.00281598	20.7474
1968	rs6862024	A	G	A	G	M15500.metal.pos.txt.gz	IPF	-0.0055	-0.0043705	0.3691	0.3576	0.0009	0.019598	8.988e-10	0.8235	7349	953873	0.00505604	37.3355
1969	rs6908972	T	G	T	G	M15500.metal.pos.txt.gz	IPF	-0.009	0.079553	0.082	0.08405	0.0018	0.034069	7.99e-07	0.01954	7349	953873	0.00339029	24.9932
1970	rs7038757	T	C	T	C	M15500.metal.pos.txt.gz	IPF	0.0041	0.031442	0.6526	0.6556	0.0009	0.021058	6.125e-06	0.1354	7349	903869	0.00281598	20.7474
1971	rs724752	T	C	T	C	M15500.metal.pos.txt.gz	IPF	0.0043	0.012715	0.3696	0.3545	0.0009	0.020946	2.65e-06	0.5438	7349	903869	0.00309654	22.8209
1972	rs729952	T	G	T	G	M15500.metal.pos.txt.gz	IPF	0.0042	-0.016934	0.4017	0.3672	0.0009	0.019342	2.738e-06	0.3813	7349	953873	0.00295461	21.7719
1973	rs735315	T	C	T	C	M15500.metal.pos.txt.gz	IPF	0.0054	0.036612	0.4943	0.527	0.0009	0.020072	1.868e-09	0.06815	7349	903869	0.00487475	35.9902
1974	rs769809	A	G	A	G	M15500.metal.pos.txt.gz	IPF	0.0046	0.0050456	0.5723	0.5935	0.0009	0.018998	3.496e-07	0.7906	7349	953873	0.0035421	26.1163
1975	rs7732790	A	C	A	C	M15500.metal.pos.txt.gz	IPF	-0.0042	-0.037042	0.59	0.5591	0.0009	0.020105	3.715e-06	0.06541	7349	903869	0.00295461	21.7719
1976	rs7929841	T	C	T	C	M15500.metal.pos.txt.gz	IPF	0.0043	0.0051199	0.6502	0.6577	0.0009	0.019675	2.103e-06	0.7947	7349	953873	0.00309654	22.8209
1977	rs7991989	T	C	T	C	M15500.metal.pos.txt.gz	IPF	0.0041	0.0065638	0.6115	0.6085	0.0009	0.01908	4.3e-06	0.7308	7349	953873	0.00281598	20.7474
1978	rs8043243	T	C	T	C	M15500.metal.pos.txt.gz	IPF	-0.004	0.021453	0.3641	0.3678	0.0009	0.019263	8.406e-06	0.2654	7349	953873	0.00268066	19.7477
1979	rs8127674	A	G	A	G	M15500.metal.pos.txt.gz	IPF	-0.0041	0.0063247	0.59	0.6012	0.0009	0.019072	5.851e-06	0.7402	7349	953873	0.00281598	20.7474
1980	rs8179836	C	G	C	G	M15500.metal.pos.txt.gz	IPF	0.0048	0.01286	0.6288	0.6254	0.0009	0.019313	1.488e-07	0.5055	7349	953873	0.0038556	28.4367
1981	rs9419445	T	C	T	C	M15500.metal.pos.txt.gz	IPF	0.0042	-0.022463	0.5296	0.5438	0.0009	0.018778	3.457e-06	0.2316	7349	953873	0.00295461	21.7719
1982	rs9557806	A	G	A	G	M15500.metal.pos.txt.gz	IPF	-0.0042	0.030182	0.5506	0.5822	0.0009	0.018894	2.396e-06	0.1102	7349	953873	0.00295461	21.7719
1983	rs9613019	T	C	T	C	M15500.metal.pos.txt.gz	IPF	-0.0041	-0.018932	0.4063	0.411	0.0009	0.02028	7.419e-06	0.3506	7349	903869	0.00281598	20.7474
1984	rs977041	A	G	A	G	M15500.metal.pos.txt.gz	IPF	0.0044	0.024554	0.4355	0.4453	0.0009	0.01873	1.269e-06	0.1899	7349	953873	0.00324177	23.8947
1985	rs9838540	A	C	A	C	M15500.metal.pos.txt.gz	IPF	0.0047	0.0068851	0.6102	0.6302	0.0009	0.019349	1.795e-07	0.722	7349	953873	0.00369721	27.2642
1986	rs9842133	T	C	T	C	M15500.metal.pos.txt.gz	IPF	0.0064	-0.017369	0.6649	0.6409	0.0009	0.019531	4.2e-12	0.3738	7349	953873	0.0068339	50.5541
1987	rs9880736	A	C	A	C	M15500.metal.pos.txt.gz	IPF	-0.0044	-0.031612	0.5431	0.5302	0.0009	0.018778	1.51e-06	0.09229	7349	953873	0.00324177	23.8947
1988	rs9947578	A	G	A	G	M15500.metal.pos.txt.gz	IPF	0.0043	-0.0033616	0.5631	0.5836	0.0009	0.019061	3.942e-06	0.86	7349	953873	0.00309654	22.8209
1989	rs996408	T	C	T	C	M15500.metal.pos.txt.gz	IPF	-0.0046	0.016251	0.5159	0.5146	0.0009	0.02152	3.667e-07	0.4502	7349	887228	0.0035421	26.1163
1995	rs10194073	A	C	A	C	M15506.metal.pos.txt.gz	IPF	-0.007	0.0033461	0.7918	0.7798	0.0015	0.024323	6.329e-06	0.8906	7310	903869	0.00297033	21.7718
1996	rs11058334	A	G	A	G	M15506.metal.pos.txt.gz	IPF	-0.0217	0.04933	0.0228	0.02462	0.0047	0.059152	4.263e-06	0.4043	7310	953873	0.00290765	21.3111
1997	rs11656215	T	C	T	C	M15506.metal.pos.txt.gz	IPF	-0.0079	0.011889	0.498	0.5108	0.0015	0.020035	7.478e-08	0.5529	7310	903869	0.00378015	27.7302
1998	rs11930490	A	G	A	G	M15506.metal.pos.txt.gz	IPF	-0.0076	0.019374	0.803	0.8004	0.0016	0.023351	1.523e-06	0.4067	7310	953873	0.00307703	22.5563
1999	rs17497383	T	G	T	G	M15506.metal.pos.txt.gz	IPF	0.0157	-0.0026258	0.0722	0.05424	0.0034	0.044997	5.336e-06	0.9535	7310	903869	0.00290843	21.3168
2000	rs17642749	T	G	T	G	M15506.metal.pos.txt.gz	IPF	-0.0165	0.011482	0.9518	0.93596	0.0035	0.037659	2.678e-06	0.7604	7310	953873	0.00303107	22.2184
2001	rs2080224	A	G	A	G	M15506.metal.pos.txt.gz	IPF	-0.0112	0.074072	0.9304	0.9198	0.0024	0.037326	1.973e-06	0.0472	7310	903869	0.00297033	21.7718
2002	rs2297615	A	T	A	T	M15506.metal.pos.txt.gz	IPF	0.007	-0.0047861	0.7752	0.7446	0.0016	0.023134	8.168e-06	0.8361	7310	903869	0.00261158	19.1354
2003	rs2824226	A	G	A	G	M15506.metal.pos.txt.gz	IPF	0.0074	-0.025442	0.8186	0.8168	0.0016	0.024271	3.187e-06	0.2945	7310	953873	0.00291768	21.3848
2004	rs4242454	A	T	A	T	M15506.metal.pos.txt.gz	IPF	0.0077	0.051645	0.1377	0.139	0.0016	0.039656	3.249e-06	0.1928	7310	488624	0.00315828	23.1538
2005	rs4487482	A	G	A	G	M15506.metal.pos.txt.gz	IPF	0.0081	0.03855	0.8039	0.8027	0.0015	0.025354	1.818e-07	0.1284	7310	903869	0.00397321	29.152
2006	rs4538138	T	G	T	G	M15506.metal.pos.txt.gz	IPF	0.0071	-0.020753	0.1884	0.2195	0.0016	0.022773	6.085e-06	0.3621	7310	953873	0.00268653	19.686
2007	rs4784175	A	T	A	T	M15506.metal.pos.txt.gz	IPF	-0.0091	0.0066871	0.8586	0.843	0.002	0.030615	8.644e-06	0.8271	7310	887228	0.00282408	20.6968
2008	rs715	T	C	T	C	M15506.metal.pos.txt.gz	IPF	0.008	-0.017156	0.7088	0.6888	0.0015	0.019995	9.11e-08	0.3909	7310	953873	0.00387609	28.4367
2009	rs7215931	A	G	A	G	M15506.metal.pos.txt.gz	IPF	0.0079	0.0058082	0.2013	0.2206	0.0016	0.022397	1.286e-06	0.7954	7310	953873	0.00332392	24.3722
2010	rs7687295	A	G	A	G	M15506.metal.pos.txt.gz	IPF	0.0211	-0.01368	0.0249	0.0363	0.0046	0.055013	4.321e-06	0.8036	7310	903869	0.00287001	21.0344
2011	rs8033100	T	C	T	C	M15506.metal.pos.txt.gz	IPF	-0.0083	0.0086218	0.8565	0.8624	0.0016	0.027055	4.939e-07	0.75	7310	953873	0.00366778	26.9028
2012	rs9321388	A	G	A	G	M15506.metal.pos.txt.gz	IPF	-0.0072	-0.011332	0.1772	0.1904	0.0016	0.025753	7.577e-06	0.6599	7310	903869	0.00276253	20.2445
2013	rs9663814	A	G	A	G	M15506.metal.pos.txt.gz	IPF	0.0069	0.011257	0.6163	0.6135	0.0014	0.019083	1.097e-06	0.5553	7310	953873	0.00331195	24.2842
2019	rs12644208	A	G	A	G	M15630.metal.pos.txt.gz	IPF	-0.0197	-0.016155	0.6293	0.6365	0.0043	0.019481	5.116e-06	0.407	7146	953873	0.00292859	20.9833
2020	rs1355074	A	G	A	G	M15630.metal.pos.txt.gz	IPF	-0.0193	0.0017317	0.2565	0.264	0.0043	0.021423	8.809e-06	0.9356	7146	953873	0.0028112	20.1398
2021	rs1509525	A	G	A	G	M15630.metal.pos.txt.gz	IPF	-0.019	0.0096967	0.2972	0.3173	0.0043	0.020162	7.59e-06	0.6306	7146	953873	0.00272472	19.5186
2022	rs17075971	A	G	A	G	M15630.metal.pos.txt.gz	IPF	0.0264	0.026136	0.1666	0.2176	0.0056	0.024742	2.233e-06	0.2908	7146	903869	0.00310042	22.2183
2023	rs17314234	T	C	T	C	M15630.metal.pos.txt.gz	IPF	-0.0324	0.022319	0.1023	0.0851	0.0069	0.035131	2.425e-06	0.5252	7146	903869	0.00307603	22.043
2024	rs1937336	A	T	A	T	M15630.metal.pos.txt.gz	IPF	0.0189	0.03067	0.6597	0.6422	0.0043	0.019696	9.071e-06	0.1194	7146	953873	0.00269619	19.3137
2025	rs2268365	T	C	T	C	M15630.metal.pos.txt.gz	IPF	0.0289	-0.05068	0.8731	0.872	0.0059	0.027663	1.108e-06	0.06694	7146	953873	0.00334636	23.9867
2026	rs7309949	A	G	A	G	M15630.metal.pos.txt.gz	IPF	-0.132	-0.046749	0.0184	0.01333	0.0277	0.074563	1.933e-06	0.5307	1751	953873	0.0128028	22.6826
2027	rs7553988	A	G	A	G	M15630.metal.pos.txt.gz	IPF	0.0203	0.0040275	0.2898	0.326	0.0043	0.021681	2.223e-06	0.8526	7146	903869	0.00310914	22.2809
2028	rs7573275	A	G	A	G	M15630.metal.pos.txt.gz	IPF	-0.1511	0.0036609	0.2739	0.2786	0.0042	0.022438	1e-200	0.8704	7146	903869	0.153346	1293.92
2029	rs9610113	A	G	A	G	M15630.metal.pos.txt.gz	IPF	-0.0208	-0.0083391	0.3153	0.3442	0.0043	0.019866	1.25e-06	0.6747	7146	953873	0.00326368	23.392
2035	rs10513863	A	G	A	G	M15650.metal.pos.txt.gz	IPF	0.0055	0.021799	0.2661	0.2567	0.0012	0.021327	7.325e-06	0.3067	7365	953873	0.00284415	21.0012
2036	rs12662536	A	T	A	T	M15650.metal.pos.txt.gz	IPF	-0.0056	0.016736	0.2919	0.2916	0.0012	0.020573	6.662e-06	0.4159	7365	953873	0.00294821	21.7719
2037	rs315988	T	C	T	C	M15650.metal.pos.txt.gz	IPF	0.0072	-0.045684	0.2367	0.2158	0.0013	0.024014	1.08e-08	0.05712	7365	937232	0.00414763	30.6662
2038	rs414540	A	G	A	G	M15650.metal.pos.txt.gz	IPF	-0.0057	-0.020619	0.782	0.8065	0.0013	0.023294	6.97e-06	0.3761	7365	953873	0.0026035	19.2196
2039	rs6108469	A	G	A	G	M15650.metal.pos.txt.gz	IPF	0.0056	-0.014926	0.7569	0.741	0.0012	0.021627	6.363e-06	0.4901	7365	953873	0.00294821	21.7719
2045	rs10508868	A	G	A	G	M15676.metal.pos.txt.gz	IPF	0.0118	0.0060431	0.8446	0.8211	0.0025	0.025682	1.642e-06	0.814	7331	953873	0.00302972	22.2723
2046	rs11084396	T	C	T	C	M15676.metal.pos.txt.gz	IPF	-0.011	-0.01765	0.544	0.5654	0.002	0.018921	3.798e-08	0.3509	5566	953873	0.00540541	30.2391
2047	rs11563662	A	G	A	G	M15676.metal.pos.txt.gz	IPF	0.0657	-0.093662	0.0136	0.012	0.0139	0.086995	2.277e-06	0.2816	1765	953873	0.0124995	22.3156
2048	rs11615860	A	G	A	G	M15676.metal.pos.txt.gz	IPF	-0.009	0.016587	0.3917	0.3789	0.0017	0.019167	1.335e-07	0.3868	7331	953873	0.00380861	28.02
2049	rs11954603	T	C	T	C	M15676.metal.pos.txt.gz	IPF	0.0306	-0.010319	0.9767	0.98168	0.0067	0.066249	4.827e-06	0.8762	7331	953873	0.00283724	20.8533
2050	rs12220364	A	G	A	G	M15676.metal.pos.txt.gz	IPF	-0.0077	0.0199	0.4107	0.4246	0.0017	0.020302	8.34e-06	0.327	7331	903869	0.00279066	20.51
2051	rs12455580	T	C	T	C	M15676.metal.pos.txt.gz	IPF	0.0117	0.015713	0.3104	0.3686	0.0023	0.019314	4.39e-07	0.4159	7331	953873	0.00351741	25.8701
2052	rs1260326	T	C	T	C	M15676.metal.pos.txt.gz	IPF	0.01	-0.0030237	0.406	0.3825	0.0017	0.019156	4.572e-09	0.8746	7331	953873	0.00469779	34.5926
2053	rs12616616	A	G	A	G	M15676.metal.pos.txt.gz	IPF	0.0079	0.010141	0.5527	0.5785	0.0017	0.01887	3.825e-06	0.591	7331	953873	0.00293708	21.5893
2054	rs16870228	A	G	A	G	M15676.metal.pos.txt.gz	IPF	0.0129	-0.03523	0.1456	0.1504	0.0025	0.026017	3.225e-07	0.1757	7331	953873	0.00361878	26.6183
2055	rs1902781	T	G	T	G	M15676.metal.pos.txt.gz	IPF	0.0076	-0.023093	0.4272	0.4528	0.0017	0.01888	6.707e-06	0.2213	7331	953873	0.00271884	19.9807
2056	rs2404519	A	G	A	G	M15676.metal.pos.txt.gz	IPF	0.0117	0.012997	0.1587	0.1691	0.0024	0.026607	1.596e-06	0.6252	7331	903869	0.00323132	23.7591
2057	rs4570993	T	C	T	C	M15676.metal.pos.txt.gz	IPF	0.0081	-0.013138	0.5322	0.5455	0.0017	0.020188	2.425e-06	0.5152	7331	903869	0.00308721	22.6962
2058	rs6846111	T	C	T	C	M15676.metal.pos.txt.gz	IPF	-0.012	-0.030238	0.1508	0.1621	0.0026	0.025691	5.463e-06	0.2392	7331	953873	0.00289729	21.296
2059	rs699530	T	G	T	G	M15676.metal.pos.txt.gz	IPF	-0.008	0.030815	0.5636	0.5783	0.0017	0.018931	2.782e-06	0.1036	7331	953873	0.00301168	22.1393
2060	rs7006068	T	C	T	C	M15676.metal.pos.txt.gz	IPF	0.0082	0.023397	0.6266	0.5992	0.0017	0.019179	2.081e-06	0.2225	7331	953873	0.00316367	23.2601
2061	rs7222769	T	C	T	C	M15676.metal.pos.txt.gz	IPF	0.0141	0.026174	0.8765	0.8842	0.003	0.028701	2.971e-06	0.3618	7331	953873	0.00300418	22.084
2062	rs7405977	T	C	T	C	M15676.metal.pos.txt.gz	IPF	-0.0114	0.0029574	0.3918	0.4072	0.0023	0.019048	1.173e-06	0.8766	7331	953873	0.00333993	24.5604
2063	rs7648992	T	C	T	C	M15676.metal.pos.txt.gz	IPF	0.0083	0.0089978	0.3947	0.3994	0.0017	0.020427	1.531e-06	0.6596	7331	903869	0.00324105	23.8309
2064	rs7761964	T	C	T	C	M15676.metal.pos.txt.gz	IPF	0.0175	-0.012194	0.6305	0.6055	0.0033	0.019219	1.709e-07	0.5258	1765	953873	0.0156833	28.0903
2065	rs7986369	A	C	A	C	M15676.metal.pos.txt.gz	IPF	-0.008	-0.01463	0.3795	0.3715	0.0017	0.019322	2.971e-06	0.4489	7331	953873	0.00301168	22.1393
2066	rs938391	A	G	A	G	M15676.metal.pos.txt.gz	IPF	0.0079	0.0074286	0.3682	0.386	0.0018	0.019274	7.229e-06	0.6999	7331	953873	0.00262063	19.2571
2072	rs11174282	T	C	T	C	M15677.metal.pos.txt.gz	IPF	-0.0615	0.03513	0.0957	0.1049	0.0137	0.030798	6.885e-06	0.254	5502	953873	0.00364923	20.1443
2073	rs17241253	T	C	T	C	M15677.metal.pos.txt.gz	IPF	0.0481	-0.012889	0.8117	0.8353	0.0107	0.024791	7.074e-06	0.6031	5502	953873	0.0036594	20.2006
2074	rs2126638	A	G	A	G	M15677.metal.pos.txt.gz	IPF	0.0816	-0.007807	0.9266	0.9236	0.0163	0.040285	5.779e-07	0.8463	5502	887228	0.00453431	25.0523
2075	rs2257187	A	T	A	T	M15677.metal.pos.txt.gz	IPF	-0.036	-0.0023091	0.5991	0.5874	0.0081	0.020322	8.084e-06	0.9095	5502	903869	0.00357732	19.7459
2076	rs3783141	T	C	T	C	M15677.metal.pos.txt.gz	IPF	0.0559	0.026024	0.8708	0.8569	0.0125	0.026623	7.746e-06	0.3283	5502	953873	0.00362166	19.9915
2077	rs7151608	A	G	A	G	M15677.metal.pos.txt.gz	IPF	0.0497	0.020799	0.8127	0.8195	0.0106	0.025779	2.86e-06	0.4198	5502	903869	0.00397968	21.9757
2078	rs8048366	A	G	A	G	M15677.metal.pos.txt.gz	IPF	-0.0363	-0.013943	0.4796	0.4465	0.0082	0.020145	9.744e-06	0.4889	5502	903869	0.00354912	19.5897
2084	rs10493278	A	T	A	T	M15749.metal.pos.txt.gz	IPF	0.0243	-0.014723	0.8124	0.8222	0.0054	0.02596	5.828e-06	0.5706	5829	903869	0.00346198	20.2431
2085	rs11647589	A	G	A	G	M15749.metal.pos.txt.gz	IPF	0.0303	-0.0092717	0.7151	0.7112	0.0045	0.022099	2.854e-11	0.6748	5829	903869	0.00771794	45.3222
2086	rs11847947	T	C	T	C	M15749.metal.pos.txt.gz	IPF	-0.0217	-0.0077954	0.3031	0.3087	0.0045	0.020272	1.535e-06	0.7006	5829	953873	0.00397348	23.2458
2087	rs11983172	A	G	A	G	M15749.metal.pos.txt.gz	IPF	-0.0326	0.011846	0.1593	0.2021	0.0073	0.024639	8.633e-06	0.6307	5829	937232	0.00340967	19.9361
2088	rs2441128	A	T	A	T	M15749.metal.pos.txt.gz	IPF	0.0239	-0.00010915	0.2361	0.2759	0.0054	0.022278	8.573e-06	0.9961	5829	903869	0.00334932	19.5821
2089	rs4772056	C	G	C	G	M15749.metal.pos.txt.gz	IPF	-0.034	0.012883	0.907	0.856	0.0076	0.028726	8.451e-06	0.6538	5829	937232	0.00342175	20.007
2090	rs584630	A	C	A	C	M15749.metal.pos.txt.gz	IPF	-0.0318	-0.053117	0.1052	0.1289	0.007	0.032399	6.273e-06	0.1011	5829	887228	0.00352801	20.6305
2091	rs6851666	A	T	A	T	M15749.metal.pos.txt.gz	IPF	-0.0526	-0.0019604	0.9632	0.94578	0.0114	0.043918	4.06e-06	0.9644	5829	953873	0.00363902	21.282
2092	rs6891705	A	C	A	C	M15749.metal.pos.txt.gz	IPF	0.02	-0.0063751	0.6963	0.6886	0.0045	0.020175	9.37e-06	0.752	5829	953873	0.00337732	19.7463
2093	rs9402497	A	G	A	G	M15749.metal.pos.txt.gz	IPF	0.024	-0.0063398	0.252	0.215	0.0054	0.02342	8.927e-06	0.7866	5829	819655	0.00337732	19.7463
2094	rs987313	A	G	A	G	M15749.metal.pos.txt.gz	IPF	0.1845	-0.15896	0.0159	0.0157	0.0416	0.10849	9.179e-06	0.1429	1259	869295	0.0153832	19.6388
2100	rs10400902	A	G	A	G	M15753.metal.pos.txt.gz	IPF	-0.0251	0.021683	0.3089	0.3432	0.0052	0.019828	1.622e-06	0.2741	7357	953873	0.00315694	23.2929
2101	rs12466421	A	G	A	G	M15753.metal.pos.txt.gz	IPF	0.0279	0.039939	0.6945	0.6944	0.006	0.020141	3.96e-06	0.04737	7357	953873	0.00293043	21.6166
2102	rs12660977	T	G	T	G	M15753.metal.pos.txt.gz	IPF	0.0405	-0.020327	0.1536	0.1606	0.0089	0.030291	5.671e-06	0.5022	7357	887228	0.00280678	20.702
2103	rs1343188	T	C	T	C	M15753.metal.pos.txt.gz	IPF	-0.0263	0.023681	0.5646	0.5385	0.0057	0.018852	4.169e-06	0.2091	7357	953873	0.0028854	21.2835
2104	rs1878105	T	C	T	C	M15753.metal.pos.txt.gz	IPF	0.0966	0.083015	0.0183	0.03721	0.0216	0.051884	7.377e-06	0.1096	7357	953873	0.00271123	19.9953
2105	rs3892034	A	T	A	T	M15753.metal.pos.txt.gz	IPF	-0.0273	0.0066261	0.7703	0.7412	0.006	0.021437	4.754e-06	0.7573	7357	953873	0.00280609	20.6969
2106	rs4338651	A	G	A	G	M15753.metal.pos.txt.gz	IPF	-0.088	-0.084394	0.026	0.023	0.018	0.066402	1.014e-06	0.2037	5599	937232	0.00425069	23.8927
2107	rs6739717	T	C	T	C	M15753.metal.pos.txt.gz	IPF	0.0441	-0.014399	0.6235	0.6416	0.0099	0.019429	8.938e-06	0.4586	1758	953873	0.0111613	19.8204
2108	rs7102716	A	T	A	T	M15753.metal.pos.txt.gz	IPF	0.027	-0.053156	0.7654	0.7598	0.006	0.02349	7.853e-06	0.02364	7357	903869	0.00274493	20.2445
2114	rs10515641	A	G	A	G	M15778.metal.pos.txt.gz	IPF	-0.0086	0.019404	0.2493	0.2368	0.0019	0.024145	4.369e-06	0.4216	7308	903869	0.0027956	20.4819
2115	rs10745735	A	G	A	G	M15778.metal.pos.txt.gz	IPF	0.0133	0.0096082	0.907	0.8984	0.0027	0.03144	1.146e-06	0.7599	7308	953873	0.00330931	24.2581
2116	rs10981455	A	G	A	G	M15778.metal.pos.txt.gz	IPF	-0.0089	-0.02721	0.3039	0.3169	0.0018	0.026545	1.083e-06	0.3053	7308	689214	0.00333416	24.4408
2117	rs11013865	T	C	T	C	M15778.metal.pos.txt.gz	IPF	0.0084	0.028637	0.214	0.2181	0.0019	0.022423	5.422e-06	0.2016	7308	953873	0.00266743	19.5404
2118	rs1151659	T	C	T	C	M15778.metal.pos.txt.gz	IPF	-0.0219	0.016505	0.2122	0.2208	0.0049	0.02391	8.236e-06	0.49	1750	937232	0.0112857	19.9526
2119	rs11838539	A	G	A	G	M15778.metal.pos.txt.gz	IPF	0.0284	-0.01614	0.0205	0.03472	0.0061	0.054035	3.382e-06	0.7652	7308	953873	0.00295728	21.67
2120	rs12150754	C	G	C	G	M15778.metal.pos.txt.gz	IPF	0.0083	-0.018392	0.7851	0.7704	0.0019	0.022234	7.698e-06	0.4081	7308	953873	0.00260446	19.0779
2121	rs12899069	T	C	T	C	M15778.metal.pos.txt.gz	IPF	0.0131	0.011006	0.7665	0.6759	0.0029	0.021739	8.583e-06	0.6126	7308	937232	0.00278444	20.3999
2122	rs159486	T	C	T	C	M15778.metal.pos.txt.gz	IPF	0.012	-0.028099	0.1205	0.1653	0.0027	0.027475	5.913e-06	0.3064	7308	903869	0.00269565	19.7477
2123	rs16876152	T	G	T	G	M15778.metal.pos.txt.gz	IPF	-0.0089	-0.028192	0.2054	0.2184	0.0019	0.022762	1.652e-06	0.2155	7308	953873	0.00299345	21.9358
2124	rs2317834	T	G	T	G	M15778.metal.pos.txt.gz	IPF	0.0129	-0.0027533	0.9041	0.8733	0.0027	0.028304	2.308e-06	0.9225	7308	953873	0.00311386	22.8209
2125	rs247616	T	C	T	C	M15778.metal.pos.txt.gz	IPF	0.0098	0.015316	0.322	0.3223	0.0019	0.021866	1.322e-07	0.4836	7308	755859	0.00362717	26.5966
2126	rs310528	A	G	A	G	M15778.metal.pos.txt.gz	IPF	0.0086	-0.028382	0.2233	0.2453	0.0018	0.021873	2.589e-06	0.1944	7308	953873	0.00311386	22.8209
2127	rs310597	A	G	A	G	M15778.metal.pos.txt.gz	IPF	-0.0088	-0.023398	0.6532	0.6146	0.0018	0.019181	1.304e-06	0.2225	7308	953873	0.0032599	23.8947
2128	rs3112496	T	C	T	C	M15778.metal.pos.txt.gz	IPF	0.0127	-0.013017	0.1331	0.1395	0.0026	0.031013	1.126e-06	0.6747	7308	887228	0.00325422	23.8529
2129	rs3131535	A	G	A	G	M15778.metal.pos.txt.gz	IPF	-0.0205	0.045893	0.9652	0.958	0.0045	0.050335	6.301e-06	0.3619	7308	937232	0.00283173	20.7474
2130	rs3765035	A	G	A	G	M15778.metal.pos.txt.gz	IPF	0.0092	0.037999	0.3438	0.3524	0.0018	0.020996	3.757e-07	0.07032	7308	903869	0.00356191	26.1163
2131	rs4353947	A	G	A	G	M15778.metal.pos.txt.gz	IPF	-0.0082	-0.0027018	0.2304	0.2427	0.0018	0.021728	8.704e-06	0.901	7308	953873	0.00283173	20.7474
2132	rs4386719	T	C	T	C	M15778.metal.pos.txt.gz	IPF	-0.0083	0.005263	0.7737	0.7808	0.0019	0.022626	7.378e-06	0.8161	7308	953873	0.00260446	19.0779
2133	rs4515826	T	G	T	G	M15778.metal.pos.txt.gz	IPF	-0.0132	0.072325	0.1021	0.1423	0.0027	0.034039	1.31e-06	0.0336	7308	821194	0.0032599	23.8947
2134	rs4672488	A	G	A	G	M15778.metal.pos.txt.gz	IPF	0.0086	0.0036998	0.2854	0.3263	0.0019	0.020136	4.078e-06	0.8542	7308	953873	0.0027956	20.4819
2135	rs4741625	A	G	A	G	M15778.metal.pos.txt.gz	IPF	0.0085	0.022865	0.2777	0.2707	0.0018	0.022459	3.495e-06	0.3086	7308	903869	0.00304208	22.2933
2136	rs4850051	A	G	A	G	M15778.metal.pos.txt.gz	IPF	-0.0086	-0.013315	0.2082	0.1921	0.0019	0.023485	3.839e-06	0.5707	7308	953873	0.0027956	20.4819
2137	rs6841005	T	C	T	C	M15778.metal.pos.txt.gz	IPF	0.0088	-0.014977	0.3264	0.3207	0.0018	0.021707	1.146e-06	0.4902	7308	903869	0.0032599	23.8947
2138	rs7283154	T	C	T	C	M15778.metal.pos.txt.gz	IPF	-0.0087	0.013319	0.2516	0.2471	0.0018	0.023695	2.319e-06	0.574	7308	903869	0.00318646	23.3547
2139	rs7513165	T	C	T	C	M15778.metal.pos.txt.gz	IPF	0.0086	0.011415	0.7526	0.7608	0.0018	0.023302	2.832e-06	0.6242	7308	903869	0.00311386	22.8209
2140	rs7561849	A	G	A	G	M15778.metal.pos.txt.gz	IPF	0.009	-0.0048886	0.2168	0.2597	0.0018	0.021437	1.01e-06	0.8196	7308	953873	0.00340925	24.9932
2141	rs8008040	T	C	T	C	M15778.metal.pos.txt.gz	IPF	-0.0087	-0.013681	0.7276	0.6891	0.0018	0.021725	2.064e-06	0.5289	7308	937232	0.00318646	23.3547
2142	rs8014112	T	C	T	C	M15778.metal.pos.txt.gz	IPF	0.0081	0.024559	0.2899	0.2814	0.0018	0.020758	9.352e-06	0.2368	7308	953873	0.00276328	20.2445
2143	rs9394526	A	G	A	G	M15778.metal.pos.txt.gz	IPF	-0.0187	0.071675	0.0529	0.05155	0.0037	0.040147	4.28e-07	0.07421	7308	953873	0.0034831	25.5365
2144	rs9514739	C	G	C	G	M15778.metal.pos.txt.gz	IPF	-0.0122	0.0078818	0.8962	0.8928	0.0027	0.02936	6.095e-06	0.7884	7308	953873	0.00278601	20.4114
2145	rs9859467	A	G	A	G	M15778.metal.pos.txt.gz	IPF	-0.0203	-0.11823	0.037	0.05242	0.0045	0.042538	5.752e-06	0.005447	7308	953873	0.0027769	20.3446
2159	rs1076302	A	G	A	G	M15990.metal.pos.txt.gz	IPF	0.018	-0.0074913	0.201	0.1975	0.004	0.023379	6.795e-06	0.7486	5026	953873	0.00401288	20.2419
2160	rs11025430	A	G	A	G	M15990.metal.pos.txt.gz	IPF	-0.0118	0.0088142	0.4231	0.4204	0.0026	0.020327	8.332e-06	0.6646	6782	903869	0.00302791	20.5916
2161	rs16876953	A	G	A	G	M15990.metal.pos.txt.gz	IPF	0.0232	-0.019599	0.0818	0.09104	0.0052	0.033161	8.687e-06	0.5545	6782	953873	0.00292643	19.8995
2162	rs170555	T	C	T	C	M15990.metal.pos.txt.gz	IPF	-0.0253	-0.007558	0.5607	0.5452	0.0055	0.018866	3.838e-06	0.6887	1756	953873	0.0119066	21.1359
2163	rs17312926	A	G	A	G	M15990.metal.pos.txt.gz	IPF	0.016	-0.018294	0.3493	0.366	0.0033	0.019417	1.424e-06	0.3461	6782	953873	0.00345423	23.5009
2164	rs1923140	A	G	A	G	M15990.metal.pos.txt.gz	IPF	0.0131	-0.017975	0.5322	0.5267	0.0027	0.018703	8.567e-07	0.3365	6782	953873	0.00345901	23.5335
2165	rs1955742	A	T	A	T	M15990.metal.pos.txt.gz	IPF	-0.012	0.01462	0.599	0.6169	0.0026	0.019199	6.239e-06	0.4464	6782	953873	0.00313109	21.2955
2166	rs1978450	A	C	A	C	M15990.metal.pos.txt.gz	IPF	0.1329	-0.023086	0.017	0.144	0.0291	0.026716	4.751e-06	0.3875	1756	953873	0.0117385	20.8338
2167	rs309293	T	C	T	C	M15990.metal.pos.txt.gz	IPF	0.0256	0.012786	0.4315	0.4078	0.0057	0.01895	6.898e-06	0.4998	1756	953873	0.0113565	20.1482
2168	rs633114	T	C	T	C	M15990.metal.pos.txt.gz	IPF	-0.0152	-0.0050519	0.3884	0.4015	0.0033	0.020529	3.913e-06	0.8056	6782	903869	0.00311849	21.2095
2169	rs7260033	T	C	T	C	M15990.metal.pos.txt.gz	IPF	-0.0117	0.003598	0.4757	0.4644	0.0026	0.01866	8.791e-06	0.8471	6782	953873	0.00297696	20.244
2170	rs7711255	A	G	A	G	M15990.metal.pos.txt.gz	IPF	-0.0173	-0.00036721	0.7968	0.777	0.0034	0.022349	4.922e-07	0.9869	6782	953873	0.00380296	25.8825
2171	rs7738342	A	G	A	G	M15990.metal.pos.txt.gz	IPF	-0.0153	-0.021376	0.2185	0.2288	0.0035	0.022172	9.168e-06	0.335	6782	953873	0.00280975	19.1038
2172	rs7788421	A	G	A	G	M15990.metal.pos.txt.gz	IPF	-0.0245	-0.008519	0.9134	0.92982	0.0054	0.03535	5.183e-06	0.8096	6782	953873	0.00302601	20.5786
2173	rs7795076	T	C	T	C	M15990.metal.pos.txt.gz	IPF	-0.017	-0.030383	0.8166	0.8286	0.0035	0.024764	1.62e-06	0.2199	6782	953873	0.00346654	23.5849
2179	rs7150776	T	C	T	C	M15996.metal.pos.txt.gz	IPF	0.0279	0.033103	0.1105	0.112	0.0057	0.029732	9.215e-07	0.2655	7281	953873	0.00327975	23.9519
2181	rs10415535	A	G	A	G	M16634.metal.pos.txt.gz	IPF	0.036	-0.012903	0.167	0.1796	0.008	0.030408	6.795e-06	0.6713	5315	887228	0.00379551	20.2424
2182	rs12197075	C	G	C	G	M16634.metal.pos.txt.gz	IPF	0.0598	-0.0089533	0.9687	0.96504	0.0134	0.050256	8.047e-06	0.8586	7064	953873	0.00281138	19.9099
2183	rs12949918	T	C	T	C	M16634.metal.pos.txt.gz	IPF	-0.0201	-0.043931	0.584	0.5868	0.0043	0.018933	2.361e-06	0.02032	7064	953873	0.00308364	21.844
2184	rs1598817	T	G	T	G	M16634.metal.pos.txt.gz	IPF	0.0541	0.025396	0.9624	0.96523	0.012	0.050872	7.096e-06	0.6176	7064	953873	0.00286902	20.3193
2185	rs16959796	T	C	T	C	M16634.metal.pos.txt.gz	IPF	0.058	-0.0091075	0.951	0.94341	0.013	0.048884	8.137e-06	0.8522	5315	887228	0.00373115	19.8978
2186	rs2216140	A	G	A	G	M16634.metal.pos.txt.gz	IPF	-0.1026	0.013428	0.0341	0.0232	0.0219	0.062592	2.733e-06	0.8301	1749	903869	0.0123937	21.9235
2187	rs7857624	T	C	T	C	M16634.metal.pos.txt.gz	IPF	0.0395	0.0089667	0.9289	0.91434	0.0087	0.032523	6.22e-06	0.7828	7064	953873	0.00290964	20.6079
2188	rs8061140	A	G	A	G	M16634.metal.pos.txt.gz	IPF	-0.0498	0.013266	0.9587	0.95663	0.0112	0.046751	8.361e-06	0.7766	7064	953873	0.00279099	19.7651
2189	rs9904521	A	G	A	G	M16634.metal.pos.txt.gz	IPF	0.0892	0.017262	0.9525	0.95671	0.02	0.048023	7.934e-06	0.7193	1749	903869	0.0112452	19.8689
2195	rs10254175	T	C	T	C	M16816.metal.pos.txt.gz	IPF	-0.0157	0.014455	0.2329	0.2369	0.0034	0.022108	3.928e-06	0.5132	4689	953873	0.00452679	21.3136
2196	rs10974528	A	G	A	G	M16816.metal.pos.txt.gz	IPF	0.0155	-0.026103	0.2038	0.1971	0.0035	0.023063	8.883e-06	0.2577	4689	953873	0.00416519	19.6039
2197	rs10980324	T	C	T	C	M16816.metal.pos.txt.gz	IPF	0.0411	0.067798	0.9677	0.96059	0.0084	0.053141	9.208e-07	0.202	4689	903869	0.00507964	23.9298
2198	rs11935679	A	G	A	G	M16816.metal.pos.txt.gz	IPF	-0.0155	0.0043335	0.202	0.1949	0.0034	0.023283	6.795e-06	0.8524	4689	953873	0.0044127	20.774
2199	rs12629505	A	G	A	G	M16816.metal.pos.txt.gz	IPF	0.0128	-0.036247	0.3983	0.3846	0.0026	0.019286	1.095e-06	0.06019	4689	953873	0.00514226	24.2263
2200	rs1517397	T	C	T	C	M16816.metal.pos.txt.gz	IPF	0.0122	0.013329	0.3986	0.3872	0.0027	0.01913	4.442e-06	0.486	4689	953873	0.00433536	20.4083
2201	rs1552422	A	G	A	G	M16816.metal.pos.txt.gz	IPF	-0.0119	-0.027004	0.5052	0.5109	0.0026	0.020058	6.004e-06	0.1782	4689	903869	0.00444766	20.9393
2202	rs17655603	T	C	T	C	M16816.metal.pos.txt.gz	IPF	0.0904	0.023838	0.9567	0.95382	0.0205	0.049701	9.912e-06	0.6315	1244	903869	0.0153912	19.4147
2203	rs1861007	C	G	C	G	M16816.metal.pos.txt.gz	IPF	-0.0181	-0.032258	0.1925	0.1859	0.004	0.023861	7.814e-06	0.1764	4689	953873	0.00434775	20.4669
2204	rs1861371	A	G	A	G	M16816.metal.pos.txt.gz	IPF	0.0165	-0.011616	0.1774	0.1624	0.0035	0.024984	2.354e-06	0.642	4689	953873	0.00471735	22.215
2205	rs2473097	T	C	T	C	M16816.metal.pos.txt.gz	IPF	0.0154	0.032528	0.7894	0.7754	0.0034	0.022584	5.895e-06	0.1498	4689	953873	0.0043562	20.5068
2206	rs4665701	T	C	T	C	M16816.metal.pos.txt.gz	IPF	-0.0121	-0.0072784	0.4689	0.4739	0.0027	0.020183	4.902e-06	0.7184	4689	903869	0.00426488	20.0751
2207	rs6810964	A	G	A	G	M16816.metal.pos.txt.gz	IPF	0.0125	-0.031775	0.5495	0.5564	0.0026	0.020113	2.079e-06	0.1141	4689	903869	0.00490521	23.104
2208	rs8105530	T	C	T	C	M16816.metal.pos.txt.gz	IPF	0.0128	0.00163	0.5286	0.527	0.0028	0.020192	4.852e-06	0.9357	4689	903869	0.00443703	20.889
2214	rs10966194	A	G	A	G	M16818.metal.pos.txt.gz	IPF	0.0159	-0.0080776	0.7354	0.7002	0.0036	0.020573	9.766e-06	0.6946	7055	953873	0.00275736	19.5014
2215	rs11022215	T	C	T	C	M16818.metal.pos.txt.gz	IPF	0.0572	0.016241	0.9308	0.93363	0.0126	0.038934	5.33e-06	0.6766	1670	953873	0.0121901	20.584
2216	rs11597065	T	C	T	C	M16818.metal.pos.txt.gz	IPF	-0.018	0.0081972	0.7513	0.7436	0.0036	0.021197	5.272e-07	0.699	7055	953873	0.00353107	24.9929
2217	rs12314479	C	G	C	G	M16818.metal.pos.txt.gz	IPF	0.0283	-0.042609	0.0853	0.09652	0.006	0.032344	2.761e-06	0.1877	7055	953873	0.00314345	22.2406
2218	rs3113185	T	C	T	C	M16818.metal.pos.txt.gz	IPF	-0.0175	0.030156	0.6254	0.5921	0.0036	0.020333	9.501e-07	0.1381	7055	903869	0.00333827	23.6237
2219	rs4332594	T	C	T	C	M16818.metal.pos.txt.gz	IPF	-0.0177	-0.016205	0.246	0.2332	0.0036	0.023926	1.109e-06	0.4982	7055	903869	0.00341475	24.1668
2220	rs4862124	A	T	A	T	M16818.metal.pos.txt.gz	IPF	0.0348	0.016536	0.945	0.90631	0.0073	0.031088	1.759e-06	0.5948	7055	953873	0.00321084	22.719
2221	rs4888946	A	T	A	T	M16818.metal.pos.txt.gz	IPF	-0.0161	-0.046332	0.7754	0.7843	0.0036	0.022537	8.78e-06	0.0398	7055	953873	0.00282696	19.9951
2222	rs7084948	T	C	T	C	M16818.metal.pos.txt.gz	IPF	-0.0322	0.019609	0.067	0.0801	0.0067	0.035303	1.536e-06	0.5786	7055	953873	0.00326321	23.0908
2228	rs11643275	C	G	C	G	M16821.metal.pos.txt.gz	IPF	-0.0128	0.0011827	0.7236	0.7241	0.0027	0.020837	2.036e-06	0.9547	6733	953873	0.00332688	22.4679
2229	rs12446555	T	G	T	G	M16821.metal.pos.txt.gz	IPF	-0.029	0.024908	0.0671	0.0795	0.0065	0.037966	9.015e-06	0.5118	6733	803014	0.00294767	19.8994
2230	rs12552851	T	C	T	C	M16821.metal.pos.txt.gz	IPF	0.0131	-0.014075	0.7391	0.716	0.0027	0.02231	1.737e-06	0.5281	6733	903869	0.0034841	23.5335
2231	rs13357681	T	C	T	C	M16821.metal.pos.txt.gz	IPF	0.0129	-0.00039721	0.2441	0.2567	0.0027	0.021692	1.964e-06	0.9854	6733	953873	0.00337888	22.8204
2232	rs13440146	T	G	T	G	M16821.metal.pos.txt.gz	IPF	-0.0292	-0.013551	0.0579	0.07804	0.006	0.037813	1.293e-06	0.7201	6733	903869	0.00350534	23.6774
2233	rs17450296	T	G	T	G	M16821.metal.pos.txt.gz	IPF	-0.0219	0.036743	0.9051	0.8763	0.0045	0.028466	1.108e-06	0.1968	6733	953873	0.00350534	23.6774
2234	rs1781619	T	C	T	C	M16821.metal.pos.txt.gz	IPF	0.016	0.027759	0.751	0.7377	0.003	0.021392	9.643e-08	0.1944	5288	953873	0.00535028	28.4337
2235	rs1879207	C	G	C	G	M16821.metal.pos.txt.gz	IPF	0.0128	0.032635	0.2501	0.2293	0.0027	0.021912	2.726e-06	0.1364	6733	953873	0.00332688	22.4679
2236	rs1939990	T	C	T	C	M16821.metal.pos.txt.gz	IPF	-0.0136	-0.0018054	0.2409	0.2196	0.0027	0.022225	6.912e-07	0.9353	6733	953873	0.00375412	25.3642
2237	rs2043660	A	T	A	T	M16821.metal.pos.txt.gz	IPF	0.036	0.0035563	0.8396	0.8143	0.0078	0.024301	4.034e-06	0.8837	1445	953873	0.0145276	21.2723
2238	rs2642169	A	G	A	G	M16821.metal.pos.txt.gz	IPF	0.0118	-0.0016722	0.5682	0.5849	0.0027	0.020271	8.632e-06	0.9343	6733	903869	0.00282877	19.0945
2239	rs2863060	A	G	A	G	M16821.metal.pos.txt.gz	IPF	-0.0132	-0.0069517	0.2677	0.2637	0.0027	0.022637	1.422e-06	0.7588	6733	903869	0.00353731	23.8941
2240	rs3778464	T	C	T	C	M16821.metal.pos.txt.gz	IPF	0.0455	-0.00085046	0.9795	0.90194	0.0096	0.030547	2.181e-06	0.9778	6733	953873	0.00332526	22.457
2241	rs4510422	T	C	T	C	M16821.metal.pos.txt.gz	IPF	-0.0158	0.0055937	0.196	0.2187	0.0035	0.022749	7.035e-06	0.8058	6733	953873	0.00301757	20.3727
2242	rs6012412	A	G	A	G	M16821.metal.pos.txt.gz	IPF	-0.0128	0.036351	0.6677	0.6967	0.0028	0.021564	4.01e-06	0.09184	6733	903869	0.00309421	20.8918
2243	rs7604529	A	G	A	G	M16821.metal.pos.txt.gz	IPF	-0.0161	0.0056146	0.8443	0.8706	0.0036	0.027133	8.039e-06	0.8361	6733	953873	0.00296176	19.9948
2244	rs7938161	A	G	A	G	M16821.metal.pos.txt.gz	IPF	0.0145	0.0040767	0.514	0.4632	0.0033	0.020144	9.943e-06	0.8396	6733	903869	0.00285928	19.301
2245	rs9890574	A	T	A	T	M16821.metal.pos.txt.gz	IPF	0.0132	0.024282	0.7604	0.7472	0.0028	0.024153	2.986e-06	0.3147	6733	621641	0.00328997	22.2179
2246	rs9926816	A	G	A	G	M16821.metal.pos.txt.gz	IPF	-0.0164	0.016944	0.8582	0.8572	0.0036	0.026916	5.193e-06	0.529	6733	953873	0.00307282	20.7469
2252	rs10065951	T	C	T	C	M16822.metal.pos.txt.gz	IPF	0.0112	-0.0026635	0.3122	0.3203	0.0025	0.029843	9.188e-06	0.9289	6549	488624	0.00305529	20.0643
2253	rs1009184	T	G	T	G	M16822.metal.pos.txt.gz	IPF	-0.0123	-0.030004	0.5453	0.5401	0.0025	0.018705	5.996e-07	0.1087	6549	953873	0.00368259	24.199
2254	rs1030420	T	C	T	C	M16822.metal.pos.txt.gz	IPF	-0.0221	0.0080944	0.1884	0.1792	0.0032	0.02565	1.016e-11	0.7523	6549	937232	0.00723033	47.6817
2255	rs11856353	T	C	T	C	M16822.metal.pos.txt.gz	IPF	-0.0162	0.0072993	0.8796	0.8809	0.0035	0.031206	2.873e-06	0.8151	6549	903869	0.00326062	21.4171
2256	rs13332924	A	C	A	C	M16822.metal.pos.txt.gz	IPF	0.0132	-0.021998	0.2301	0.2438	0.0026	0.021864	4.758e-07	0.3143	6549	953873	0.00392031	25.7673
2257	rs2333040	A	G	A	G	M16822.metal.pos.txt.gz	IPF	0.0115	0.0083205	0.4575	0.459	0.0025	0.018846	4.156e-06	0.6588	6549	953873	0.00322062	21.1535
2258	rs2372342	A	G	A	G	M16822.metal.pos.txt.gz	IPF	0.0217	-0.064021	0.9307	0.9395	0.0049	0.038231	9.435e-06	0.09402	6549	953873	0.00298575	19.6063
2259	rs2632020	T	C	T	C	M16822.metal.pos.txt.gz	IPF	0.0109	0.0387	0.4506	0.4555	0.0025	0.018699	9.83e-06	0.03849	6549	953873	0.00289427	19.0038
2260	rs4273762	T	C	T	C	M16822.metal.pos.txt.gz	IPF	-0.0182	-0.042666	0.1	0.08923	0.0041	0.032599	8.748e-06	0.1906	6549	953873	0.00299982	19.6989
2261	rs4325745	T	C	T	C	M16822.metal.pos.txt.gz	IPF	-0.014	0.0091566	0.596	0.5874	0.003	0.019042	3.061e-06	0.6306	4962	953873	0.00436973	21.769
2262	rs504899	T	C	T	C	M16822.metal.pos.txt.gz	IPF	-0.0232	0.045789	0.0734	0.07219	0.0048	0.035145	1.423e-06	0.1926	6549	953873	0.00355445	23.354
2263	rs6024831	A	G	A	G	M16822.metal.pos.txt.gz	IPF	-0.0189	0.01419	0.9232	0.91006	0.0042	0.035148	7.093e-06	0.6864	6549	903869	0.00308254	20.2438
2264	rs6748268	T	C	T	C	M16822.metal.pos.txt.gz	IPF	0.0112	-0.032461	0.6942	0.6778	0.0025	0.020179	8.734e-06	0.1077	6549	953873	0.00305529	20.0643
2265	rs6959584	T	C	T	C	M16822.metal.pos.txt.gz	IPF	0.0173	0.0074496	0.1278	0.1512	0.0035	0.028391	6.103e-07	0.793	6549	903869	0.00371676	24.4244
2266	rs7699551	T	C	T	C	M16822.metal.pos.txt.gz	IPF	-0.0118	-0.0042108	0.5871	0.6019	0.0025	0.019051	3.306e-06	0.8251	6549	953873	0.00339027	22.2716
2267	rs8112502	A	G	A	G	M16822.metal.pos.txt.gz	IPF	-0.0212	0.01819	0.0918	0.0936	0.0041	0.033636	2.642e-07	0.5887	6549	903869	0.00406593	26.7283
2268	rs9393768	A	G	A	G	M16822.metal.pos.txt.gz	IPF	0.0114	0.024792	0.3579	0.3408	0.0025	0.020129	6.24e-06	0.2181	6549	819655	0.00316503	20.7872
2274	rs11111705	A	G	A	G	M16823.metal.pos.txt.gz	IPF	-0.0492	0.011587	0.6141	0.5885	0.0111	0.020406	8.902e-06	0.5702	3393	903869	0.00575696	19.6349
2275	rs11721313	T	C	T	C	M16823.metal.pos.txt.gz	IPF	-0.0959	-0.024392	0.0704	0.08152	0.0217	0.033983	9.834e-06	0.4729	3393	953873	0.00572323	19.5192
2276	rs12584638	A	G	A	G	M16823.metal.pos.txt.gz	IPF	-0.0945	-0.0029264	0.6398	0.672	0.0209	0.019931	6.238e-06	0.8833	604	953873	0.0327399	20.3765
2277	rs13336955	T	C	T	C	M16823.metal.pos.txt.gz	IPF	0.1061	-0.058887	0.0541	0.06611	0.0233	0.037442	5.476e-06	0.1158	3393	953873	0.0060742	20.7235
2278	rs1373765	T	C	T	C	M16823.metal.pos.txt.gz	IPF	-0.0637	-0.043184	0.7973	0.7112	0.0141	0.020758	6.419e-06	0.0375	3393	953873	0.00597933	20.3979
2279	rs17579664	T	G	T	G	M16823.metal.pos.txt.gz	IPF	-0.0601	-0.0093725	0.2583	0.2896	0.0126	0.022438	1.836e-06	0.6762	3393	903869	0.00666073	22.738
2280	rs269263	T	C	T	C	M16823.metal.pos.txt.gz	IPF	-0.0487	0.0082586	0.3981	0.3913	0.0105	0.020522	3.321e-06	0.6874	3393	903869	0.00630015	21.4992
2281	rs343836	T	C	T	C	M16823.metal.pos.txt.gz	IPF	-0.1801	0.021756	0.9796	0.97077	0.0385	0.055195	2.829e-06	0.6935	3393	953873	0.00640811	21.8701
2282	rs6008912	A	G	A	G	M16823.metal.pos.txt.gz	IPF	0.1439	-0.017247	0.159	0.1939	0.0296	0.023548	1.189e-06	0.4639	604	953873	0.0376558	23.5558
2288	rs10005912	T	G	T	G	M17799.metal.pos.txt.gz	IPF	0.1151	0.019485	0.9533	0.93948	0.0252	0.038182	5.094e-06	0.6098	1739	953873	0.0118542	20.8377
2289	rs10068843	A	C	A	C	M17799.metal.pos.txt.gz	IPF	-0.1072	0.046534	0.046	0.06551	0.0239	0.040123	7.434e-06	0.2461	1739	903869	0.0114366	20.0953
2290	rs10421478	T	C	T	C	M17799.metal.pos.txt.gz	IPF	-0.0639	-0.021627	0.153	0.1696	0.0143	0.024997	7.684e-06	0.3869	1739	953873	0.011352	19.9448
2291	rs10875231	T	G	T	G	M17799.metal.pos.txt.gz	IPF	-0.0515	0.0076953	0.2715	0.2616	0.0113	0.021608	5.427e-06	0.7217	1739	953873	0.0118032	20.7471
2292	rs10900676	C	G	C	G	M17799.metal.pos.txt.gz	IPF	-0.305	0.083063	0.987	0.98823	0.067	0.085579	5.308e-06	0.3317	1714	953873	0.0119459	20.6987
2293	rs10988783	T	C	T	C	M17799.metal.pos.txt.gz	IPF	-0.1623	0.020677	0.04	0.07214	0.0299	0.034468	5.624e-08	0.5486	25	953873	0.540983	27.1071
2294	rs10998867	A	G	A	G	M17799.metal.pos.txt.gz	IPF	0.1623	-0.033649	0.96	0.8621	0.0299	0.028911	5.624e-08	0.2445	25	903869	0.540983	27.1071
2295	rs11161725	A	C	A	C	M17799.metal.pos.txt.gz	IPF	-0.1623	-0.047162	0.04	0.02172	0.0299	0.06923	5.624e-08	0.4957	25	953873	0.540983	27.1071
2296	rs11265416	A	G	A	G	M17799.metal.pos.txt.gz	IPF	0.0995	0.17551	0.9118	0.98114	0.0202	0.070196	8.302e-07	0.01241	25	953873	0.492519	22.3219
2297	rs11612437	A	G	A	G	M17799.metal.pos.txt.gz	IPF	-0.1389	0.11422	0.0367	0.02314	0.0307	0.058526	5.909e-06	0.05098	1739	953873	0.0116344	20.4469
2298	rs11703458	A	G	A	G	M17799.metal.pos.txt.gz	IPF	-0.1963	0.022798	0.036	0.01492	0.0432	0.096976	5.458e-06	0.8141	25	887228	0.452328	18.9959
2299	rs11803192	T	C	T	C	M17799.metal.pos.txt.gz	IPF	0.1002	0.056478	0.9061	0.90216	0.0172	0.034399	6.104e-09	0.1006	1739	903869	0.0191419	33.8984
2300	rs11819046	T	C	T	C	M17799.metal.pos.txt.gz	IPF	-0.1237	0.00065354	0.0689	0.04582	0.0205	0.048974	1.676e-09	0.9894	1739	903869	0.0205084	36.369
2301	rs12238450	A	G	A	G	M17799.metal.pos.txt.gz	IPF	0.1431	-0.057409	0.9559	0.95962	0.0307	0.047276	3.093e-06	0.2246	1739	953873	0.0123399	21.7021
2302	rs12327976	A	G	A	G	M17799.metal.pos.txt.gz	IPF	0.1079	-0.012918	0.9239	0.93474	0.0195	0.036868	3.276e-08	0.726	1739	953873	0.0173019	30.5826
2303	rs12622555	T	C	T	C	M17799.metal.pos.txt.gz	IPF	-0.1623	-0.072302	0.04	0.04934	0.0299	0.04307	5.624e-08	0.09321	25	953873	0.540983	27.1071
2304	rs12684749	A	G	A	G	M17799.metal.pos.txt.gz	IPF	0.1623	-0.042905	0.96	0.96333	0.0299	0.050224	5.624e-08	0.393	25	953873	0.540983	27.1071
2305	rs13007817	A	G	A	G	M17799.metal.pos.txt.gz	IPF	-0.114	0.029054	0.0685	0.1366	0.0218	0.030127	1.616e-07	0.3349	1739	903869	0.0154818	27.3147
2306	rs13035089	T	G	T	G	M17799.metal.pos.txt.gz	IPF	0.063	-0.0067038	0.8393	0.8499	0.0143	0.026175	9.807e-06	0.7979	1739	953873	0.011038	19.3869
2307	rs13041562	T	C	T	C	M17799.metal.pos.txt.gz	IPF	0.0697	0.0074273	0.8472	0.7972	0.0151	0.023289	3.761e-06	0.7498	1739	953873	0.0121038	21.282
2308	rs1353529	T	G	T	G	M17799.metal.pos.txt.gz	IPF	-0.0569	0.01618	0.3696	0.5021	0.0127	0.018648	7.455e-06	0.3856	25	953873	0.445347	18.4674
2309	rs1382668	A	G	A	G	M17799.metal.pos.txt.gz	IPF	0.0927	0.011483	0.9273	0.96452	0.0206	0.047916	7.014e-06	0.8106	1739	953873	0.0115106	20.2267
2310	rs1429342	A	G	A	G	M17799.metal.pos.txt.gz	IPF	0.1439	-0.09125	0.9623	0.98937	0.0284	0.096772	4.145e-07	0.3457	1739	937232	0.0145486	25.644
2311	rs1498721	T	C	T	C	M17799.metal.pos.txt.gz	IPF	0.1222	0.0062179	0.953	0.9352	0.0241	0.040678	3.9e-07	0.8785	1739	937232	0.0145692	25.6808
2312	rs1561803	T	G	T	G	M17799.metal.pos.txt.gz	IPF	0.1304	0.011516	0.9623	0.9607	0.028	0.045742	3.282e-06	0.8012	1739	953873	0.0123185	21.664
2313	rs1608368	T	C	T	C	M17799.metal.pos.txt.gz	IPF	-0.1623	-0.027241	0.04	0.0612	0.0299	0.038846	5.624e-08	0.4831	25	953873	0.540983	27.1071
2314	rs16828389	T	C	T	C	M17799.metal.pos.txt.gz	IPF	-0.165	0.19134	0.0405	0.01785	0.0303	0.072542	5.009e-08	0.008349	25	953873	0.542577	27.2816
2315	rs16834234	T	C	T	C	M17799.metal.pos.txt.gz	IPF	-0.1418	0.01042	0.0372	0.03862	0.0321	0.047217	9.918e-06	0.8253	1739	953873	0.0110968	19.4914
2316	rs16874680	T	C	T	C	M17799.metal.pos.txt.gz	IPF	0.1181	-0.049889	0.9573	0.94408	0.025	0.041253	2.378e-06	0.2265	1739	953873	0.0126702	22.2905
2317	rs16947929	A	G	A	G	M17799.metal.pos.txt.gz	IPF	-0.1419	0.099852	0.0406	0.02751	0.0282	0.056251	4.87e-07	0.07588	1739	953873	0.0143512	25.291
2318	rs17025221	A	T	A	T	M17799.metal.pos.txt.gz	IPF	-0.0944	-0.046873	0.0832	0.1011	0.0195	0.030735	1.319e-06	0.1272	1739	953873	0.0132972	23.4086
2319	rs17069415	A	G	A	G	M17799.metal.pos.txt.gz	IPF	-0.1552	0.02969	0.0383	0.02405	0.0286	0.060162	5.664e-08	0.6217	1739	953873	0.0166517	29.4138
2320	rs17098098	T	C	T	C	M17799.metal.pos.txt.gz	IPF	-0.0961	-0.020089	0.0738	0.119	0.0171	0.029959	1.934e-08	0.5025	1739	953873	0.0178377	31.5468
2321	rs17224513	A	G	A	G	M17799.metal.pos.txt.gz	IPF	-0.0911	0.0013911	0.0812	0.08552	0.0192	0.035711	2.078e-06	0.9689	1739	903869	0.0127805	22.4872
2322	rs17303404	C	G	C	G	M17799.metal.pos.txt.gz	IPF	0.1424	0.039535	0.9617	0.94554	0.0265	0.042304	7.461e-08	0.35	1739	953873	0.0163334	28.8422
2323	rs17488959	T	G	T	G	M17799.metal.pos.txt.gz	IPF	-0.1116	0.11011	0.0776	0.05019	0.0218	0.042915	3.194e-07	0.0103	1739	953873	0.0148464	26.1767
2324	rs17506661	T	C	T	C	M17799.metal.pos.txt.gz	IPF	-0.1171	-0.015487	0.0465	0.0559	0.0235	0.040695	6.218e-07	0.7035	1739	953873	0.0140774	24.8015
2325	rs17557803	T	C	T	C	M17799.metal.pos.txt.gz	IPF	0.0971	0.031104	0.9267	0.90407	0.0213	0.031912	5.386e-06	0.3297	1739	953873	0.0118092	20.7577
2326	rs1790642	A	G	A	G	M17799.metal.pos.txt.gz	IPF	-0.0732	-0.022657	0.16	0.1544	0.0165	0.028308	8.927e-06	0.4235	25	903869	0.440482	18.1068
2327	rs1792131	A	G	A	G	M17799.metal.pos.txt.gz	IPF	0.1008	-0.021964	0.9141	0.867	0.0208	0.029766	1.208e-06	0.4606	1739	903869	0.0133251	23.4582
2328	rs187090	T	C	T	C	M17799.metal.pos.txt.gz	IPF	-0.1623	-0.081587	0.04	0.01043	0.0299	0.091217	5.624e-08	0.3711	25	903869	0.540983	27.1071
2329	rs1896703	T	G	T	G	M17799.metal.pos.txt.gz	IPF	-0.1538	-0.065084	0.0817	0.06601	0.0226	0.037457	9.672e-12	0.08228	25	953873	0.649429	42.6073
2330	rs1954097	T	C	T	C	M17799.metal.pos.txt.gz	IPF	0.0926	0.012535	0.9146	0.7891	0.0202	0.023337	4.639e-06	0.5912	25	953873	0.456693	19.3333
2331	rs2155977	T	C	T	C	M17799.metal.pos.txt.gz	IPF	0.0964	0.032223	0.9371	0.9752	0.0195	0.074398	8.179e-07	0.6649	1739	865371	0.0138588	24.411
2332	rs217763	T	C	T	C	M17799.metal.pos.txt.gz	IPF	0.0552	0.011013	0.4911	0.4414	0.0108	0.018853	3.233e-07	0.5591	1739	953873	0.0147998	26.0934
2333	rs2374150	C	G	C	G	M17799.metal.pos.txt.gz	IPF	-0.1422	-0.054096	0.0418	0.06576	0.0282	0.040055	4.548e-07	0.1768	1739	903869	0.0144111	25.3981
2334	rs2469235	A	G	A	G	M17799.metal.pos.txt.gz	IPF	0.1221	0.01269	0.948	0.9643	0.0204	0.05445	2.093e-09	0.8157	1739	937232	0.0201844	35.7825
2335	rs2473138	A	G	A	G	M17799.metal.pos.txt.gz	IPF	0.1053	0.014194	0.9395	0.90994	0.0218	0.03264	1.421e-06	0.6637	1739	953873	0.013239	23.3047
2336	rs2486578	A	G	A	G	M17799.metal.pos.txt.gz	IPF	0.1523	-0.00023442	0.9524	0.789	0.0326	0.022995	2.988e-06	0.9919	25	953873	0.466103	20.0795
2337	rs276642	A	G	A	G	M17799.metal.pos.txt.gz	IPF	0.1626	0.051923	0.9591	0.93353	0.0299	0.040893	5.623e-08	0.2042	25	903869	0.5419	27.2074
2338	rs2861997	A	G	A	G	M17799.metal.pos.txt.gz	IPF	0.0897	0.031758	0.9163	0.8936	0.0187	0.030465	1.541e-06	0.2972	1739	953873	0.0130585	22.9827
2339	rs28951670	T	C	T	C	M17799.metal.pos.txt.gz	IPF	-0.1627	0.018363	0.0414	0.08165	0.0299	0.034552	5.152e-08	0.5951	25	953873	0.542205	27.2408
2340	rs3925748	A	C	A	C	M17799.metal.pos.txt.gz	IPF	-0.0826	0.037224	0.1468	0.155	0.0182	0.03273	5.549e-06	0.2554	25	751718	0.451726	18.9498
2341	rs4141286	C	G	C	G	M17799.metal.pos.txt.gz	IPF	0.1065	-0.028712	0.9514	0.9319	0.0231	0.039737	3.951e-06	0.47	1739	903869	0.0120753	21.2312
2342	rs4454728	A	G	A	G	M17799.metal.pos.txt.gz	IPF	-0.1672	-0.035598	0.0408	0.03428	0.0307	0.054487	5.209e-08	0.5135	25	903869	0.542641	27.2887
2343	rs4488147	T	C	T	C	M17799.metal.pos.txt.gz	IPF	-0.1623	-0.026558	0.04	0.02835	0.0299	0.057043	5.624e-08	0.6415	25	953873	0.540983	27.1071
2344	rs463183	A	G	A	G	M17799.metal.pos.txt.gz	IPF	-0.1164	-0.019976	0.0833	0.06083	0.0232	0.038603	4.981e-07	0.6048	25	953873	0.501721	23.1589
2345	rs4733038	A	C	A	C	M17799.metal.pos.txt.gz	IPF	-0.1718	-0.05836	0.0208	0.0209	0.0387	0.06964	9.034e-06	0.402	1739	937232	0.0112055	19.6845
2346	rs4768766	A	C	A	C	M17799.metal.pos.txt.gz	IPF	-0.1376	-0.023927	0.0417	0.0476	0.0243	0.044394	1.575e-08	0.5899	1739	953873	0.0181046	32.0276
2347	rs5809847	T	C	T	C	M17799.metal.pos.txt.gz	IPF	0.1145	-0.056376	0.9106	0.94459	0.025	0.065126	4.601e-06	0.3867	25	671281	0.456243	19.2983
2348	rs600711	A	G	A	G	M17799.metal.pos.txt.gz	IPF	0.1004	0.055647	0.9334	0.9054	0.0179	0.032762	2.077e-08	0.08941	1739	953873	0.0177695	31.424
2349	rs6070814	T	C	T	C	M17799.metal.pos.txt.gz	IPF	-0.0813	-0.04485	0.1104	0.1052	0.0165	0.030895	7.875e-07	0.1466	1739	953873	0.0137687	24.2501
2350	rs6506569	T	C	T	C	M17799.metal.pos.txt.gz	IPF	0.0541	0.0037169	0.5349	0.5154	0.0105	0.018832	2.4e-07	0.8435	1739	953873	0.0150361	26.5165
2351	rs665540	T	G	T	G	M17799.metal.pos.txt.gz	IPF	-0.1368	0.00071664	0.118	0.253	0.0266	0.021774	2.767e-07	0.9737	25	953873	0.514082	24.3331
2352	rs6783548	T	C	T	C	M17799.metal.pos.txt.gz	IPF	-0.0779	-0.027131	0.6219	0.608	0.0162	0.01937	1.624e-06	0.1613	25	953873	0.480498	21.2732
2353	rs7144659	A	G	A	G	M17799.metal.pos.txt.gz	IPF	0.0554	-0.065364	0.8457	0.96911	0.0113	0.051738	9.857e-07	0.2065	1739	953873	0.0136333	24.0084
2354	rs7454011	T	G	T	G	M17799.metal.pos.txt.gz	IPF	-0.1313	-0.018691	0.0448	0.0403	0.0235	0.044102	2.342e-08	0.6717	1739	953873	0.0176347	31.1813
2355	rs7616688	A	G	A	G	M17799.metal.pos.txt.gz	IPF	-0.163	0.009209	0.0408	0.04026	0.03	0.045918	5.502e-08	0.841	25	953873	0.541462	27.1594
2356	rs7688643	T	C	T	C	M17799.metal.pos.txt.gz	IPF	0.083	-0.040016	0.9032	0.8862	0.0186	0.035133	8.233e-06	0.2547	1739	887228	0.011321	19.8898
2357	rs7692251	A	G	A	G	M17799.metal.pos.txt.gz	IPF	0.133	-0.064138	0.9573	0.95853	0.028	0.045014	1.966e-06	0.1542	1739	953873	0.0128082	22.5366
2358	rs7701924	A	G	A	G	M17799.metal.pos.txt.gz	IPF	-0.0907	-0.0095866	0.0923	0.08447	0.0191	0.033529	2.083e-06	0.7749	1739	953873	0.0128013	22.5241
2359	rs7708256	T	C	T	C	M17799.metal.pos.txt.gz	IPF	-0.1541	-0.031137	0.0274	0.03068	0.0348	0.055024	9.602e-06	0.5715	1739	953873	0.0111501	19.5861
2360	rs771788	A	G	A	G	M17799.metal.pos.txt.gz	IPF	-0.0881	-0.035825	0.0921	0.09982	0.0187	0.032738	2.515e-06	0.2738	1739	953873	0.0126026	22.1702
2361	rs7751252	T	C	T	C	M17799.metal.pos.txt.gz	IPF	0.105	-0.040705	0.9491	0.93681	0.0227	0.038567	3.895e-06	0.2912	1739	953873	0.0121539	21.3711
2362	rs7755387	T	G	T	G	M17799.metal.pos.txt.gz	IPF	-0.1252	-0.030234	0.0397	0.06008	0.0259	0.039252	1.298e-06	0.4411	1739	953873	0.0132591	23.3405
2363	rs7785951	T	G	T	G	M17799.metal.pos.txt.gz	IPF	-0.1396	0.012817	0.0389	0.05032	0.0267	0.042883	1.666e-07	0.765	1739	953873	0.0154766	27.3054
2364	rs7969423	A	G	A	G	M17799.metal.pos.txt.gz	IPF	-0.1138	0.022297	0.0833	0.1858	0.0237	0.024157	1.556e-06	0.356	25	953873	0.479776	21.2117
2365	rs831541	T	C	T	C	M17799.metal.pos.txt.gz	IPF	-0.0567	0.035793	0.2066	0.1964	0.0116	0.027452	9.874e-07	0.1923	1739	887228	0.0135527	23.8644
2366	rs836533	A	T	A	T	M17799.metal.pos.txt.gz	IPF	0.1623	0.25362	0.96	0.990934	0.0299	0.094331	5.624e-08	0.007175	25	953873	0.540983	27.1071
2367	rs928907	T	C	T	C	M17799.metal.pos.txt.gz	IPF	-0.0749	0.10359	0.0952	0.03661	0.0166	0.049802	6.037e-06	0.03752	25	953873	0.448836	18.7299
2368	rs9341191	T	C	T	C	M17799.metal.pos.txt.gz	IPF	-0.1636	0.039523	0.0476	0.0555	0.0301	0.050649	5.675e-08	0.4352	25	887228	0.541634	27.1782
2369	rs945493	A	G	A	G	M17799.metal.pos.txt.gz	IPF	-0.1625	0.022139	0.0433	0.07588	0.0301	0.034318	6.451e-08	0.5188	25	953873	0.538282	26.814
2370	rs9557045	A	T	A	T	M17799.metal.pos.txt.gz	IPF	-0.1164	-0.0087206	0.087	0.07831	0.0234	0.038188	6.281e-07	0.8194	25	903869	0.497429	22.7647
2371	rs9861255	A	G	A	G	M17799.metal.pos.txt.gz	IPF	0.1156	0.070976	0.92	0.91544	0.0231	0.032547	5.739e-07	0.0292	25	953873	0.500433	23.0398
2372	rs997892	A	C	A	C	M17799.metal.pos.txt.gz	IPF	0.0925	0.026784	0.9349	0.91257	0.0181	0.0362	3.139e-07	0.4594	1739	903869	0.0147963	26.0871
2373	rs9999552	A	G	A	G	M17799.metal.pos.txt.gz	IPF	0.1464	-0.012413	0.9321	0.8705	0.0213	0.028661	5.697e-12	0.6649	25	953873	0.653938	43.4621
2379	rs1027175	A	G	A	G	M17805.metal.pos.txt.gz	IPF	0.0221	-0.034675	0.8735	0.8846	0.005	0.030546	9.558e-06	0.2563	7353	903869	0.00264989	19.5311
2380	rs1348656	T	C	T	C	M17805.metal.pos.txt.gz	IPF	-0.0202	-0.0084403	0.798	0.8065	0.0042	0.023593	1.516e-06	0.7205	7353	953873	0.003136	23.1252
2381	rs1477025	T	C	T	C	M17805.metal.pos.txt.gz	IPF	0.0164	0.002303	0.6547	0.64	0.0034	0.020846	2.01e-06	0.912	7353	903869	0.00315423	23.2601
2382	rs16839086	A	C	A	C	M17805.metal.pos.txt.gz	IPF	0.0329	-0.0055654	0.2302	0.3164	0.0074	0.019931	8.805e-06	0.7801	1767	953873	0.0110627	19.7441
2383	rs1709851	A	C	A	C	M17805.metal.pos.txt.gz	IPF	-0.0155	0.029976	0.6588	0.6684	0.0035	0.019934	7.62e-06	0.1326	7353	953873	0.00266015	19.6069
2384	rs3793900	A	C	A	C	M17805.metal.pos.txt.gz	IPF	-0.0154	-0.019309	0.6359	0.6561	0.0034	0.021115	7.412e-06	0.3605	7353	903869	0.00278233	20.51
2385	rs6557244	T	C	T	C	M17805.metal.pos.txt.gz	IPF	0.0302	-0.011886	0.9101	0.9188	0.0067	0.039159	7.324e-06	0.7615	7353	887228	0.00275551	20.3117
2386	rs6738713	T	C	T	C	M17805.metal.pos.txt.gz	IPF	-0.0308	0.0018374	0.9295	0.93134	0.0066	0.036166	3.378e-06	0.9595	7353	953873	0.00295301	21.7719
2387	rs9560579	A	G	A	G	M17805.metal.pos.txt.gz	IPF	-0.0153	0.01875	0.5193	0.481	0.0034	0.020105	6.405e-06	0.351	7353	903869	0.00274641	20.2445
2393	rs1390947	A	C	A	C	M17807.metal.pos.txt.gz	IPF	-0.0272	-0.014435	0.4471	0.4504	0.005	0.020119	5.722e-08	0.4731	7226	937232	0.00407873	29.5854
2394	rs1398802	T	G	T	G	M17807.metal.pos.txt.gz	IPF	-0.026	0.01218	0.6877	0.6606	0.0057	0.019838	6.115e-06	0.5392	7226	953873	0.00287111	20.8006
2395	rs16934512	A	C	A	C	M17807.metal.pos.txt.gz	IPF	-0.0233	0.0090523	0.5653	0.5696	0.0052	0.018842	7.363e-06	0.6309	7226	953873	0.00277078	20.0717
2396	rs17091567	T	C	T	C	M17807.metal.pos.txt.gz	IPF	0.0332	-0.026536	0.1249	0.1244	0.0074	0.028349	7.532e-06	0.3492	7226	953873	0.00277784	20.123
2397	rs17289436	A	G	A	G	M17807.metal.pos.txt.gz	IPF	-0.0248	-0.043778	0.5235	0.4979	0.0056	0.020507	9.626e-06	0.03278	7226	903869	0.00270678	19.6068
2398	rs1864468	A	G	A	G	M17807.metal.pos.txt.gz	IPF	-0.0251	-0.030808	0.6161	0.6041	0.005	0.019139	5.937e-07	0.1075	7226	953873	0.00347534	25.1934
2399	rs2048428	T	C	T	C	M17807.metal.pos.txt.gz	IPF	-0.036	-0.043568	0.133	0.139	0.0081	0.026688	9.518e-06	0.1026	7226	953873	0.00272616	19.7476
2400	rs2199680	A	T	A	T	M17807.metal.pos.txt.gz	IPF	-0.0415	0.0098693	0.8328	0.7922	0.0065	0.025431	2.174e-10	0.698	7226	903869	0.00560956	40.752
2401	rs2847326	A	T	A	T	M17807.metal.pos.txt.gz	IPF	0.0259	0.028664	0.2376	0.2532	0.0058	0.021801	9.277e-06	0.1886	7226	953873	0.002752	19.9353
2402	rs296381	T	C	T	C	M17807.metal.pos.txt.gz	IPF	0.039	-0.0088239	0.8282	0.8436	0.0067	0.025354	4.825e-09	0.7278	7226	953873	0.00466713	33.8734
2403	rs4393440	T	C	T	C	M17807.metal.pos.txt.gz	IPF	-0.129	0.029246	0.987	0.94843	0.028	0.043023	4.082e-06	0.4967	5482	953873	0.00385697	21.218
2404	rs450940	T	C	T	C	M17807.metal.pos.txt.gz	IPF	-0.0251	-0.0098617	0.5116	0.5131	0.005	0.02014	5.041e-07	0.6244	7226	903869	0.00347534	25.1934
2405	rs480891	A	G	A	G	M17807.metal.pos.txt.gz	IPF	-0.0235	-0.0042389	0.6432	0.6517	0.0051	0.019687	4.148e-06	0.8295	7226	953873	0.0029297	21.2263
2406	rs6603803	A	G	A	G	M17807.metal.pos.txt.gz	IPF	-0.0253	-0.021638	0.4879	0.4879	0.0049	0.018708	2.929e-07	0.2474	7226	953873	0.0036758	26.6519
2407	rs6900835	T	C	T	C	M17807.metal.pos.txt.gz	IPF	-0.0284	0.025313	0.2163	0.2203	0.0059	0.022468	1.437e-06	0.2599	7226	953873	0.00319628	23.1639
2408	rs7610725	A	G	A	G	M17807.metal.pos.txt.gz	IPF	-0.1714	-0.041447	0.9698	0.98617	0.0373	0.090795	4.421e-06	0.648	1744	937232	0.0119627	21.0914
2409	rs878983	T	C	T	C	M17807.metal.pos.txt.gz	IPF	-0.0269	-0.0041815	0.2282	0.2628	0.006	0.021808	8.148e-06	0.8479	7226	953873	0.00277394	20.0947
2410	rs9552597	A	G	A	G	M17807.metal.pos.txt.gz	IPF	0.0306	0.043953	0.1845	0.2091	0.0065	0.024795	2.152e-06	0.07629	7226	937232	0.00305765	22.1562
2411	rs9632722	A	G	A	G	M17807.metal.pos.txt.gz	IPF	0.0571	-0.022884	0.9087	0.8945	0.0085	0.031028	1.517e-11	0.4608	7226	953873	0.0062063	45.1143
2412	rs9972424	A	G	A	G	M17807.metal.pos.txt.gz	IPF	-0.0242	0.034719	0.6602	0.6529	0.0051	0.023285	2.041e-06	0.136	7226	705855	0.00310628	22.5097
2418	rs10443953	A	G	A	G	M17945.metal.pos.txt.gz	IPF	0.0086	-0.029723	0.382	0.3739	0.0018	0.020606	2.599e-06	0.1492	7315	903869	0.00311089	22.8209
2419	rs10841406	A	G	A	G	M17945.metal.pos.txt.gz	IPF	-0.0087	0.0034888	0.3963	0.3567	0.0018	0.021069	2.273e-06	0.8685	7315	903869	0.00318342	23.3547
2420	rs10892951	A	G	A	G	M17945.metal.pos.txt.gz	IPF	-0.0088	-0.014544	0.4059	0.3783	0.0018	0.019212	1.655e-06	0.449	7315	953873	0.00325679	23.8947
2421	rs11150606	T	C	T	C	M17945.metal.pos.txt.gz	IPF	-0.072	0.1227	0.989	0.96568	0.014	0.060196	2.706e-07	0.04151	5554	882012	0.00473958	26.4395
2422	rs11210537	A	G	A	G	M17945.metal.pos.txt.gz	IPF	0.0085	-0.052313	0.3117	0.3192	0.0019	0.021507	4.963e-06	0.015	7315	903869	0.00272854	20.0084
2423	rs12208243	A	G	A	G	M17945.metal.pos.txt.gz	IPF	0.0236	-0.042873	0.9516	0.9227	0.0053	0.041107	8.254e-06	0.297	7315	887228	0.00270323	19.8223
2424	rs12536678	C	G	C	G	M17945.metal.pos.txt.gz	IPF	-0.0096	-0.025183	0.3198	0.3411	0.0019	0.019723	2.039e-07	0.2016	7315	953873	0.00347783	25.5221
2425	rs12639715	T	C	T	C	M17945.metal.pos.txt.gz	IPF	0.0085	-0.021384	0.6649	0.6799	0.0019	0.020157	4.184e-06	0.2887	7315	953873	0.00272854	20.0084
2426	rs12975371	A	G	A	G	M17945.metal.pos.txt.gz	IPF	-0.0081	-0.024829	0.5367	0.5441	0.0018	0.020087	9.152e-06	0.2164	7315	903869	0.00276064	20.2445
2427	rs16909189	T	C	T	C	M17945.metal.pos.txt.gz	IPF	0.0217	0.017707	0.0502	0.052	0.0045	0.041698	1.393e-06	0.6711	7315	953873	0.00316885	23.2475
2428	rs2555231	T	C	T	C	M17945.metal.pos.txt.gz	IPF	-0.0094	0.01082	0.6247	0.6222	0.0018	0.01924	3.223e-07	0.5738	7315	953873	0.00371433	27.2641
2429	rs2745001	A	G	A	G	M17945.metal.pos.txt.gz	IPF	-0.0081	0.029403	0.3976	0.4112	0.0018	0.018899	9.253e-06	0.1198	7315	953873	0.00276064	20.2445
2430	rs6033014	T	C	T	C	M17945.metal.pos.txt.gz	IPF	-0.0087	-0.025946	0.3688	0.3713	0.0018	0.022403	2.6e-06	0.2468	7315	903869	0.00318342	23.3547
2431	rs6462013	A	G	A	G	M17945.metal.pos.txt.gz	IPF	-0.0082	0.010046	0.5116	0.5014	0.0018	0.018607	7.138e-06	0.5893	7315	953873	0.00282903	20.7474
2432	rs6564154	T	C	T	C	M17945.metal.pos.txt.gz	IPF	0.0096	0.031321	0.6689	0.6688	0.0019	0.019856	2.565e-07	0.1147	7315	953873	0.00347783	25.5221
2433	rs6905811	T	C	T	C	M17945.metal.pos.txt.gz	IPF	0.009	-0.0034956	0.343	0.3414	0.0018	0.021138	1.008e-06	0.8687	7315	903869	0.00340599	24.9932
2434	rs697635	A	G	A	G	M17945.metal.pos.txt.gz	IPF	0.0084	-0.021505	0.3292	0.341	0.0019	0.019725	5.153e-06	0.2756	7315	953873	0.00266488	19.5404
2435	rs7283743	T	C	T	C	M17945.metal.pos.txt.gz	IPF	-0.0128	0.0016571	0.1245	0.1152	0.0028	0.02848	5.007e-06	0.9536	7315	953873	0.00284873	20.8922
2436	rs7322113	T	C	T	C	M17945.metal.pos.txt.gz	IPF	-0.0453	-0.020614	0.9889	0.98983	0.0098	0.088998	3.65e-06	0.8168	7315	953873	0.00291248	21.3612
2437	rs913416	T	C	T	C	M17945.metal.pos.txt.gz	IPF	-0.0082	-0.013823	0.5313	0.5419	0.0018	0.018725	7.516e-06	0.4604	7315	953873	0.00282903	20.7474
2438	rs9302365	A	C	A	C	M17945.metal.pos.txt.gz	IPF	-0.0096	-0.015118	0.4684	0.4649	0.0019	0.020258	2.175e-07	0.4555	7315	903869	0.00347783	25.5221
2439	rs9408014	A	T	A	T	M17945.metal.pos.txt.gz	IPF	-0.0158	-0.030642	0.8976	0.8881	0.0034	0.029611	4.101e-06	0.3008	7315	953873	0.00294348	21.5893
2440	rs9715724	T	C	T	C	M17945.metal.pos.txt.gz	IPF	0.009	-0.00020785	0.448	0.4423	0.002	0.02052	6.795e-06	0.9919	5554	903869	0.00363278	20.2427
2446	rs10791723	A	T	A	T	M18254.metal.pos.txt.gz	IPF	-0.0658	0.020383	0.3242	0.3309	0.0141	0.019847	2.962e-06	0.3044	1659	953873	0.012957	21.7515
2447	rs11915650	A	G	A	G	M18254.metal.pos.txt.gz	IPF	-0.0474	0.0012383	0.1557	0.1505	0.01	0.031257	2.221e-06	0.9684	7071	887228	0.00316736	22.4612
2448	rs12341812	T	C	T	C	M18254.metal.pos.txt.gz	IPF	-0.093	-0.096144	0.9564	0.93095	0.0188	0.044162	7.435e-07	0.02947	7071	887228	0.00344881	24.464
2449	rs12895893	A	G	A	G	M18254.metal.pos.txt.gz	IPF	-0.0443	-0.034329	0.8278	0.8157	0.0093	0.023861	1.964e-06	0.1502	7071	953873	0.00319867	22.684
2450	rs13387835	A	T	A	T	M18254.metal.pos.txt.gz	IPF	-0.0622	0.015207	0.9417	0.94524	0.0138	0.039785	6.237e-06	0.7023	7071	953873	0.00286481	20.3095
2451	rs17777937	T	C	T	C	M18254.metal.pos.txt.gz	IPF	-0.0744	0.055876	0.0548	0.07373	0.0165	0.035247	6.198e-06	0.1129	7071	953873	0.00286715	20.3262
2452	rs29456	T	C	T	C	M18254.metal.pos.txt.gz	IPF	-0.0356	0.029231	0.2189	0.2311	0.0077	0.024295	4.097e-06	0.2289	7071	903869	0.00301389	21.3696
2453	rs946712	A	C	A	C	M18254.metal.pos.txt.gz	IPF	0.084	0.0078993	0.9563	0.9606	0.0165	0.04895	3.294e-07	0.8718	7071	903869	0.00365192	25.91
2459	rs10886877	T	C	T	C	M18281.metal.pos.txt.gz	IPF	-0.1704	-0.023523	0.9072	0.8519	0.0356	0.030907	1.747e-06	0.4466	2433	887228	0.00932882	22.8919
2460	rs11824477	T	C	T	C	M18281.metal.pos.txt.gz	IPF	0.0951	-0.0053609	0.5787	0.5712	0.0215	0.01896	9.593e-06	0.7774	2433	953873	0.00797744	19.5491
2461	rs17021783	A	G	A	G	M18281.metal.pos.txt.gz	IPF	-0.3999	-0.0062508	0.9857	0.97651	0.0838	0.063241	1.844e-06	0.9213	2433	953873	0.00927314	22.754
2462	rs17682068	A	G	A	G	M18281.metal.pos.txt.gz	IPF	-0.1836	-0.022033	0.9239	0.93089	0.0349	0.038041	1.453e-07	0.5625	2433	953873	0.0112471	27.6527
2463	rs1951656	T	C	T	C	M18281.metal.pos.txt.gz	IPF	-0.42	-0.059229	0.986	0.972	0.0887	0.053972	2.201e-06	0.2725	2078	953873	0.0106744	22.3992
2464	rs219633	A	G	A	G	M18281.metal.pos.txt.gz	IPF	0.1483	0.016757	0.121	0.1246	0.0297	0.033188	5.96e-07	0.6136	2433	887228	0.0101438	24.9122
2465	rs37058	A	T	A	T	M18281.metal.pos.txt.gz	IPF	0.1894	-0.02766	0.0686	0.1392	0.0416	0.031674	5.251e-06	0.3825	2433	887228	0.00844786	20.7117
2466	rs3800052	T	C	T	C	M18281.metal.pos.txt.gz	IPF	0.1715	0.053256	0.0846	0.109	0.0377	0.035939	5.46e-06	0.1384	2433	887228	0.00843384	20.677
2467	rs735507	A	G	A	G	M18281.metal.pos.txt.gz	IPF	-0.1128	-0.025856	0.8134	0.7975	0.0246	0.022921	4.6e-06	0.2593	2433	953873	0.00856779	21.0083
2468	rs7663798	A	G	A	G	M18281.metal.pos.txt.gz	IPF	0.1966	-0.0039032	0.0486	0.05511	0.0438	0.04154	7.231e-06	0.9251	2433	953873	0.00821287	20.1308
2474	rs12340032	T	G	T	G	M18283.metal.pos.txt.gz	IPF	-0.0273	-0.0059724	0.4693	0.4676	0.006	0.018804	5.588e-06	0.7508	5984	953873	0.00344771	20.6956
2475	rs12764831	A	G	A	G	M18283.metal.pos.txt.gz	IPF	0.0253	0.02472	0.6005	0.5683	0.0055	0.018917	4.461e-06	0.1913	5984	953873	0.00352364	21.1529
2476	rs1321208	T	C	T	C	M18283.metal.pos.txt.gz	IPF	-0.0355	-0.017894	0.1913	0.2298	0.0073	0.022213	1.053e-06	0.4205	5984	953873	0.00393647	23.641
2477	rs1392786	T	C	T	C	M18283.metal.pos.txt.gz	IPF	-0.0282	-0.0084163	0.4017	0.4445	0.0059	0.018862	1.934e-06	0.6555	5984	953873	0.00380319	22.8375
2478	rs2035344	A	G	A	G	M18283.metal.pos.txt.gz	IPF	0.0254	-0.027761	0.6893	0.6725	0.0056	0.021552	6.739e-06	0.1977	5984	903869	0.00342617	20.5658
2479	rs4708792	A	G	A	G	M18283.metal.pos.txt.gz	IPF	-0.0673	-0.0084049	0.1015	0.1227	0.0143	0.029354	2.61e-06	0.7746	1448	953873	0.015066	22.1186
2480	rs6725791	T	C	T	C	M18283.metal.pos.txt.gz	IPF	0.0259	-0.045644	0.4058	0.408	0.0054	0.019025	1.81e-06	0.01643	5984	953873	0.00382961	22.9968
2481	rs9854875	A	G	A	G	M18283.metal.pos.txt.gz	IPF	0.0266	0.037775	0.3185	0.3304	0.0056	0.019932	2.047e-06	0.05808	5984	953873	0.00375631	22.555
2487	rs17209311	C	G	C	G	M18335.metal.pos.txt.gz	IPF	0.0723	0.031508	0.1068	0.1523	0.0157	0.026402	4.169e-06	0.2327	5899	953873	0.00358212	21.1997
2488	rs2726698	C	G	C	G	M18335.metal.pos.txt.gz	IPF	-0.0791	0.0022162	0.6936	0.8287	0.0152	0.025068	2.117e-07	0.9296	1452	953873	0.0183094	27.0438
2489	rs6955908	T	C	T	C	M18335.metal.pos.txt.gz	IPF	0.0386	-0.0081881	0.4325	0.4301	0.0083	0.020308	3.496e-06	0.6868	5899	903869	0.00365301	21.6208
2490	rs6999144	T	C	T	C	M18335.metal.pos.txt.gz	IPF	0.0668	-0.028168	0.915	0.90693	0.015	0.032898	8.462e-06	0.3919	5899	953873	0.00335069	19.8255
2491	rs7088140	T	G	T	G	M18335.metal.pos.txt.gz	IPF	0.0353	-0.02266	0.5864	0.592	0.0079	0.019009	7.255e-06	0.2332	5899	953873	0.00337326	19.9594
2497	rs10159475	A	G	A	G	M18349.metal.pos.txt.gz	IPF	0.0157	-0.010548	0.8276	0.8119	0.0034	0.023689	4.094e-06	0.6561	6939	953873	0.00306346	21.3165
2498	rs1055689	A	G	A	G	M18349.metal.pos.txt.gz	IPF	-0.0135	0.0043004	0.2969	0.304	0.0027	0.020166	4.261e-07	0.8311	6939	953873	0.00358989	24.9928
2499	rs10759811	A	T	A	T	M18349.metal.pos.txt.gz	IPF	-0.0119	-0.023086	0.653	0.6421	0.0027	0.01968	7.025e-06	0.2408	6939	953873	0.00279161	19.4196
2500	rs11623441	T	C	T	C	M18349.metal.pos.txt.gz	IPF	0.0121	-0.040115	0.6919	0.6842	0.0027	0.021587	7.84e-06	0.06313	6939	903869	0.00288597	20.0779
2501	rs11647808	A	C	A	C	M18349.metal.pos.txt.gz	IPF	0.0249	0.018178	0.0735	0.07464	0.0051	0.035292	8.569e-07	0.6065	6939	953873	0.00342351	23.8305
2502	rs12880087	A	C	A	C	M18349.metal.pos.txt.gz	IPF	-0.0192	0.065683	0.1577	0.0822	0.0043	0.034147	9.897e-06	0.05442	6939	953873	0.00286499	19.9315
2503	rs15676	A	G	A	G	M18349.metal.pos.txt.gz	IPF	0.0191	0.019438	0.7123	0.7377	0.0027	0.022454	1.326e-12	0.3867	6939	903869	0.00716014	50.0281
2504	rs2689672	T	G	T	G	M18349.metal.pos.txt.gz	IPF	0.0119	-0.0032769	0.7286	0.7315	0.0027	0.021059	9.5e-06	0.8763	6939	953873	0.00279161	19.4196
2505	rs2932525	A	G	A	G	M18349.metal.pos.txt.gz	IPF	-0.0157	-0.023053	0.8432	0.8545	0.0035	0.027932	7.552e-06	0.4092	6939	903869	0.0028914	20.1158
2506	rs4719964	A	G	A	G	M18349.metal.pos.txt.gz	IPF	-0.0123	0.013568	0.2554	0.2373	0.0027	0.021695	4.459e-06	0.5317	6939	953873	0.00298187	20.7471
2507	rs6910570	A	G	A	G	M18349.metal.pos.txt.gz	IPF	0.0125	-0.030335	0.5538	0.5536	0.0026	0.020686	1.842e-06	0.1425	6939	769651	0.00331996	23.1072
2508	rs7727858	A	G	A	G	M18349.metal.pos.txt.gz	IPF	-0.0205	-0.046246	0.8891	0.8862	0.0042	0.02908	1.077e-06	0.1118	6939	953873	0.00342156	23.8168
2509	rs7805747	A	G	A	G	M18349.metal.pos.txt.gz	IPF	0.0131	-0.0043539	0.2679	0.2554	0.0028	0.021195	3.769e-06	0.8372	6939	953873	0.00314457	21.8827
2510	rs940008	A	G	A	G	M18349.metal.pos.txt.gz	IPF	0.0251	-0.01446	0.4416	0.4797	0.0054	0.01877	2.636e-06	0.4411	1492	953873	0.0142741	21.5763
2516	rs17092360	A	G	A	G	M18357.metal.pos.txt.gz	IPF	-0.0671	-0.017828	0.9096	0.90382	0.0143	0.03105	2.61e-06	0.5658	2079	953873	0.0104796	21.9966
2517	rs17498524	T	C	T	C	M18357.metal.pos.txt.gz	IPF	0.0422	-0.016236	0.7903	0.7615	0.0095	0.023858	9.646e-06	0.4962	2079	903869	0.00940201	19.7133
2518	rs1772858	A	G	A	G	M18357.metal.pos.txt.gz	IPF	-0.0341	-0.0085061	0.6211	0.6455	0.0076	0.019471	7.984e-06	0.6622	2079	953873	0.00959051	20.1124
2519	rs3846242	T	C	T	C	M18357.metal.pos.txt.gz	IPF	0.0383	0.0062317	0.5792	0.5337	0.0086	0.018696	8.042e-06	0.7389	2079	953873	0.0094498	19.8145
2520	rs4905425	A	C	A	C	M18357.metal.pos.txt.gz	IPF	0.0377	-0.017425	0.5066	0.4864	0.0075	0.018744	5.715e-07	0.3526	2079	953873	0.0120077	25.2431
2521	rs7349940	A	T	A	T	M18357.metal.pos.txt.gz	IPF	-0.0611	-0.034418	0.1269	0.129	0.0132	0.033366	3.594e-06	0.3023	2079	887228	0.0102006	21.4051
2522	rs7697449	T	C	T	C	M18357.metal.pos.txt.gz	IPF	0.0383	0.029831	0.5636	0.5749	0.0085	0.018825	6.18e-06	0.113	1204	953873	0.0165833	20.2692
2528	rs10426971	A	G	A	G	M18369.metal.pos.txt.gz	IPF	0.0076	0.027093	0.4387	0.4449	0.0017	0.018793	8.177e-06	0.1494	7354	953873	0.00271036	19.9807
2529	rs11151740	A	G	A	G	M18369.metal.pos.txt.gz	IPF	-0.0115	0.01753	0.839	0.799	0.0026	0.024611	9.284e-06	0.4763	7354	953873	0.00265321	19.5583
2530	rs12707434	A	G	A	G	M18369.metal.pos.txt.gz	IPF	-0.0501	-0.029237	0.9639	0.97376	0.0101	0.06012	7.658e-07	0.6267	1762	953873	0.0137722	24.5776
2531	rs13188217	A	C	A	C	M18369.metal.pos.txt.gz	IPF	0.0081	0.021381	0.4184	0.407	0.0017	0.020541	1.77e-06	0.2979	7354	903869	0.00307758	22.6962
2532	rs13189579	A	G	A	G	M18369.metal.pos.txt.gz	IPF	-0.0192	-0.008889	0.9299	0.9209	0.0043	0.034232	7.058e-06	0.7951	7354	953873	0.00270375	19.9318
2533	rs1382190	A	G	A	G	M18369.metal.pos.txt.gz	IPF	-0.0401	0.017524	0.9891	0.98627	0.0091	0.076024	9.323e-06	0.8177	7354	953873	0.00263352	19.4128
2534	rs17185878	A	G	A	G	M18369.metal.pos.txt.gz	IPF	-0.0122	0.0019245	0.8515	0.8488	0.0025	0.026189	8.678e-07	0.9414	7354	953873	0.00322784	23.8079
2535	rs17652614	A	G	A	G	M18369.metal.pos.txt.gz	IPF	-0.0078	0.02962	0.5436	0.5469	0.0017	0.020432	7.291e-06	0.1471	7354	903869	0.00285448	21.0462
2536	rs17794361	A	C	A	C	M18369.metal.pos.txt.gz	IPF	0.024	-0.023509	0.847	0.828	0.005	0.029252	1.587e-06	0.4216	5592	887228	0.00410327	23.0318
2537	rs2043769	T	C	T	C	M18369.metal.pos.txt.gz	IPF	-0.0111	-0.0017111	0.8032	0.8042	0.0025	0.023472	8.715e-06	0.9419	7354	953873	0.0026735	19.7082
2538	rs2201453	A	G	A	G	M18369.metal.pos.txt.gz	IPF	0.0082	-0.006991	0.438	0.4339	0.0017	0.018835	1.139e-06	0.7105	7354	953873	0.0031538	23.2601
2539	rs2203995	A	G	A	G	M18369.metal.pos.txt.gz	IPF	0.0077	-0.015355	0.6055	0.6367	0.0017	0.019318	7.255e-06	0.4267	7354	953873	0.00278196	20.51
2540	rs2413113	T	C	T	C	M18369.metal.pos.txt.gz	IPF	-0.0076	0.019943	0.4667	0.4952	0.0017	0.018704	5.742e-06	0.2863	7354	953873	0.00271036	19.9807
[truncated: 5,382 more rows]
