# Supplementary material for: The causal relationship between genetically predicted blood metabolites and idiopathic pulmonary fibrosis: A bidirectional two-sample Mendelian randomization study
Source: PLoS One. 2024 Apr 16;19(4):e0300423. doi: 10.1371/journal.pone.0300423 (PMC11020755; doi:10.1371/journal.pone.0300423)
Supplement: S10 Table — (XLSX) [file pone.0300423.s016.xlsx]

## Sheet: Sheet1
Supplementary Table S10: Sensitivity analysis results of the MR analyses for the effect of IPF on blood metabolites (P < 5.00E-06, IPF GWAS from Zhou et al.)
	Metabolite	outcome	exposure	nsnp	Q_Inverse.variance.weighted	Q_df_Inverse.variance.weighted	Q_pval_Inverse.variance.weighted	egger_intercept	se_egger_intercept	pval_egger_intercept	steiger_pval
1	glutamine	M00053	IPF	6	2.49513	5	0.777228	-0.00572565	0.00384383	0.210579	0.742016
2	tryptophan	M00054	IPF	6	1.9692	5	0.85339	-0.00010315	0.00347285	0.977728	0.871372
3	histidine	M00059	IPF	6	4.67797	5	0.456431	0.00119426	0.00444089	0.80129	0.381669
4	leucine	M00060	IPF	6	6.59131	5	0.252852	0.00194115	0.00435109	0.678589	0.0910731
5	cholesterol	M00063	IPF	6	4.24037	5	0.515352	0.00530545	0.00541671	0.382811	0.429767
6	phenylalanine	M00064	IPF	6	4.74297	5	0.448047	0.00773313	0.00406768	0.130071	0.326906
7	creatinine	M00513	IPF	6	6.95641	5	0.223903	0.012087	0.00532306	0.0856632	0.0523874
8	lactate	M00527	IPF	6	4.39199	5	0.494464	0.00164383	0.00764293	0.840227	0.337256
9	3-hydroxybutyrate (BHBA)	M00542	IPF	6	7.69862	5	0.173646	-0.043703	0.0233426	0.134481	0.00921254
10	cotinine	M00553	IPF	6	2.28408	5	0.808602	0.0531654	0.0566074	0.400805	0.268875
11	caffeine	M00569	IPF	6	7.41341	5	0.191665	0.058727	0.0292319	0.114929	0.106198
12	arabinose	M00575	IPF	6	1.99527	5	0.849799	0.00244411	0.0124072	0.853439	0.606181
13	fructose	M00577	IPF	6	5.78526	5	0.327678	-0.00374519	0.0155423	0.821428	0.228783
14	mannose	M00584	IPF	6	4.00321	5	0.548953	-0.00195624	0.00777235	0.813681	0.402739
15	pyruvate	M00599	IPF	6	4.54345	5	0.474091	0.0091536	0.0124833	0.504052	0.382432
16	uridine	M00606	IPF	6	6.40009	5	0.269211	-0.0047902	0.0065297	0.50387	0.211589
17	linoleate (18:2n6)	M01105	IPF	6	6.11198	5	0.295474	-0.00987995	0.00860467	0.314881	0.0442096
18	allantoin	M01107	IPF	6	7.84959	5	0.164722	0.0358056	0.0148388	0.0733186	0.0520164
19	arachidonate (20:4n6)	M01110	IPF	6	4.82141	5	0.438062	-8.11591e-05	0.00880057	0.993084	0.348439
20	deoxycholate	M01114	IPF	6	3.04934	5	0.69238	-0.00756137	0.0223704	0.752352	0.435618
21	margarate (17:0)	M01121	IPF	6	5.65901	5	0.340825	-0.0167838	0.00991159	0.16564	0.275013
22	inosine	M01123	IPF	6	5.84989	5	0.3211	0.0288701	0.0385607	0.495666	0.0882946
23	isoleucine	M01125	IPF	6	3.24039	5	0.66298	0.00284679	0.00496351	0.596982	0.478512
24	threonine	M01284	IPF	6	5.15118	5	0.397711	-0.00578493	0.00830392	0.524384	0.198054
25	tyrosine	M01299	IPF	6	4.32897	5	0.503087	0.00712526	0.00517429	0.240538	0.291585
26	lysine	M01301	IPF	6	2.78526	5	0.73305	0.0036436	0.00541671	0.538024	0.668654
27	methionine	M01302	IPF	6	2.65017	5	0.753729	-0.00246205	0.00460034	0.620888	0.457894
28	malate	M01303	IPF	6	8.72958	5	0.120349	0.0168851	0.0101058	0.170076	0.0783546
29	palmitate (16:0)	M01336	IPF	6	11.1371	5	0.0487291	-0.00758868	0.00937573	0.463684	0.0170477
30	nonadecanoate (19:0)	M01356	IPF	6	5.18706	5	0.393481	-0.018606	0.00859422	0.0963535	0.31228
31	stearate (18:0)	M01358	IPF	6	8.35572	5	0.13769	-0.00733672	0.00797165	0.409471	0.0514506
32	oleate (18:1n9)	M01359	IPF	6	8.43069	5	0.134042	-0.00809769	0.0106846	0.490717	0.0227634
33	pentadecanoate (15:0)	M01361	IPF	6	11.6008	5	0.0406869	-0.00467031	0.0137793	0.751703	0.0228105
34	myristate (14:0)	M01365	IPF	6	9.17614	5	0.102242	-0.00955237	0.0118858	0.466626	0.0498333
35	pipecolate	M01444	IPF	6	5.91805	5	0.314275	-0.0111097	0.0141676	0.476777	0.245845
36	ornithine	M01493	IPF	6	4.12254	5	0.531912	-0.00279183	0.00777235	0.737604	0.448897
37	5-oxoproline	M01494	IPF	6	5.6968	5	0.336848	-0.00498179	0.00586797	0.443715	0.0788321
38	pantothenate	M01508	IPF	6	2.34442	5	0.799721	0.00236399	0.00905295	0.806886	0.794111
39	salicylate	M01515	IPF	6	2.96561	5	0.705288	0.0642578	0.058406	0.333009	0.281168
40	4-acetamidobutanoate	M01558	IPF	6	4.22774	5	0.517115	0.0106998	0.00635398	0.167476	0.361986
41	alpha-tocopherol	M01561	IPF	6	10.5468	5	0.0611434	0.0143812	0.0148065	0.386409	0.0473708
42	citrate	M01564	IPF	6	3.90383	5	0.563344	0.00265672	0.00644983	0.701525	0.237167
43	glycerate	M01572	IPF	6	2.90681	5	0.714351	-0.000475545	0.00774866	0.954008	0.672291
44	guanosine	M01573	IPF	6	11.2698	5	0.0462862	0.0419811	0.0323285	0.263894	0.00816359
45	N-acetylalanine	M01585	IPF	6	1.98267	5	0.851538	-0.00324028	0.00507707	0.558039	0.844526
46	urate	M01604	IPF	6	4.97514	5	0.418922	0.00380385	0.00548159	0.525917	0.327556
47	ursodeoxycholate	M01605	IPF	6	3.00767	5	0.698803	-0.00120297	0.021714	0.958476	0.396071
48	arginine	M01638	IPF	6	8.2205	5	0.144495	0.00759777	0.0106785	0.516069	0.102957
49	ascorbate (Vitamin C)	M01640	IPF	6	4.95375	5	0.421551	0.00142029	0.0383113	0.972204	0.0635793
51	heptanoate (7:0)	M01644	IPF	6	7.9693	5	0.157936	0.00635328	0.00879106	0.509861	0.0344188
52	laurate (12:0)	M01645	IPF	6	10.3316	5	0.0663665	-0.00706141	0.00966008	0.505301	0.0384251
53	valine	M01649	IPF	6	3.50801	5	0.622175	0.00622205	0.00428686	0.220292	0.550131
54	urea	M01670	IPF	6	2.82171	5	0.727449	0.00814929	0.00801601	0.366822	0.485337
55	cortisol	M01712	IPF	6	6.69863	5	0.244036	0.011253	0.0122736	0.411101	0.171296
56	cortisone	M01769	IPF	6	10.2486	5	0.0684913	0.00388507	0.00960711	0.706612	0.0318345
57	proline	M01898	IPF	6	4.71514	5	0.451624	-0.00157875	0.00683984	0.828783	0.0352143
58	citrulline	M02132	IPF	6	3.15417	5	0.676231	-0.00558201	0.00607148	0.409921	0.623143
59	biliverdin	M02137	IPF	6	3.49408	5	0.624284	0.0101228	0.0127562	0.471871	0.148928
60	serotonin (5HT)	M02342	IPF	6	4.30566	5	0.506298	-0.00848274	0.0120618	0.520662	0.20015
61	gamma-glutamylglutamine	M02730	IPF	6	4.60013	5	0.466599	-0.00826528	0.0067168	0.285911	0.294527
62	gamma-glutamyltyrosine	M02734	IPF	6	8.52909	5	0.129387	0.00977095	0.00782167	0.279698	0.0916376
63	hypoxanthine	M03127	IPF	4	1.57932	3	0.664087	-0.00469545	0.0101952	0.690344	0.0048987
64	betaine	M03141	IPF	6	5.50893	5	0.356967	-0.00601178	0.00851094	0.518936	0.0983524
65	xanthine	M03147	IPF	6	5.20928	5	0.390877	0.0053591	0.0104016	0.633566	0.114919
50	caprate (10:0)	M10642	IPF	6	7.77616	5	0.169011	-0.00117063	0.00816126	0.892881	0.116508
66	phosphate	M11438	IPF	6	2.80268	5	0.730375	0.000375386	0.00454325	0.938119	0.657864
67	3-methoxytyrosine	M12017	IPF	6	0.296275	5	0.997713	-0.00389116	0.00904099	0.689086	0.711599
68	pelargonate (9:0)	M12035	IPF	6	9.92051	5	0.0775192	0.00470444	0.0101857	0.668179	0.0208445
69	undecanoate (11:0)	M12067	IPF	6	10.8558	5	0.0543162	-0.00830645	0.00759491	0.335537	0.0423214
70	beta-hydroxyisovalerate	M12129	IPF	6	4.89551	5	0.428764	0.0024283	0.0100321	0.820643	0.307497
71	taurodeoxycholate	M12261	IPF	6	2.30928	5	0.804903	0.00600551	0.0333347	0.865788	0.18817
72	X-02973	M12593	IPF	6	7.73893	5	0.171223	-0.000945688	0.00718161	0.901594	0.0377413
73	X-03003	M12626	IPF	6	4.79667	5	0.441195	0.000874675	0.0088882	0.926342	0.362705
74	X-03088	M12768	IPF	5	9.59456	4	0.0478401	-0.00366035	0.020275	0.868239	0.00547477
75	X-03094	M12774	IPF	6	1.54808	5	0.907456	-0.000183967	0.00769128	0.982063	0.85141
76	glycerol	M15122	IPF	6	3.13203	5	0.679639	0.00595725	0.00812607	0.504143	0.480552
77	kynurenine	M15140	IPF	6	10.2304	5	0.0689647	0.0143325	0.00661739	0.0962524	0.0258686
78	mannitol	M15335	IPF	6	6.99529	5	0.220991	0.0544444	0.0304637	0.148436	0.113283
79	glycerol 3-phosphate (G3P)	M15365	IPF	6	3.56131	5	0.614132	0.00338802	0.00847916	0.709889	0.453126
80	acetylphosphate	M15488	IPF	6	6.97448	5	0.222545	-0.000393684	0.00682934	0.956795	0.111938
81	carnitine	M15500	IPF	6	4.40377	5	0.492861	-0.00152588	0.00358574	0.69234	0.137366
82	choline	M15506	IPF	6	7.39458	5	0.192909	0.00923008	0.00449439	0.109232	0.152039
83	N-acetylornithine	M15630	IPF	6	2.54412	5	0.769836	0.0144595	0.0141656	0.365087	0.322672
84	N1-methyladenosine	M15650	IPF	6	9.30004	5	0.0976786	0.00480168	0.00584399	0.45743	0.0735533
85	3-methyl-2-oxovalerate	M15676	IPF	6	3.76136	5	0.584259	-0.000362754	0.00629522	0.956812	0.144987
86	3-methylhistidine	M15677	IPF	6	10.0257	5	0.0745103	-0.0394332	0.0411115	0.391788	0.0313808
87	3-phenylpropionate (hydrocinnamate)	M15749	IPF	6	11.3754	5	0.0444245	-0.0214945	0.0234547	0.411296	0.0128994
88	hippurate	M15753	IPF	6	7.62661	5	0.17805	0.0139832	0.0231759	0.578818	0.132078
89	benzoate	M15778	IPF	6	8.39744	5	0.13565	0.00437792	0.00877608	0.644074	0.0133296
90	phenylacetate	M15958	IPF	6	3.22652	5	0.665109	-0.00341964	0.0132105	0.80852	0.393987
91	glycerophosphorylcholine (GPC)	M15990	IPF	6	2.10488	5	0.834451	-1.90598e-05	0.0105643	0.998647	0.82775
92	aspartate	M15996	IPF	6	1.59036	5	0.902412	0.00440444	0.0129916	0.751643	0.985253
93	X-04357	M16634	IPF	6	8.43055	5	0.134049	0.0167264	0.0199452	0.448874	0.0634
94	X-04494	M16816	IPF	6	9.01229	5	0.108575	-0.017482	0.0132076	0.256207	0.0480165
95	X-04495	M16818	IPF	6	0.19665	5	0.999149	0.00262479	0.0113792	0.828892	0.527312
96	X-04498	M16821	IPF	6	1.56248	5	0.905749	0.00780365	0.00935044	0.450901	0.956099
97	X-04499--3,4-dihydroxybutyrate	M16822	IPF	6	3.73266	5	0.588511	0.0104996	0.00842766	0.280806	0.392353
98	X-04500	M16823	IPF	6	1.31767	5	0.933103	-0.0301909	0.0363581	0.453013	0.774216
99	ibuprofen	M17799	IPF	6	3.29458	5	0.654671	0.0325863	0.0401988	0.463053	0.229066
100	dihomo-linoleate (20:2n6)	M17805	IPF	6	3.95565	5	0.555819	-0.0111526	0.0116663	0.393221	0.301082
101	X-18601	M17807	IPF	6	2.21736	5	0.818325	0.00916339	0.0173041	0.624452	0.811974
102	2-hydroxystearate	M17945	IPF	6	3.07872	5	0.687851	-0.00397664	0.00662862	0.58089	0.466623
103	paraxanthine	M18254	IPF	6	14.9578	5	0.0105441	0.0782855	0.0233623	0.028544	0.00861036
104	2-hydroxyhippurate (salicylurate)	M18281	IPF	6	3.80033	5	0.578506	0.0856609	0.067155	0.27115	0.177407
105	X-05426	M18283	IPF	6	11.4043	5	0.0439278	0.0334649	0.0260978	0.269011	0.0265333
106	quinate	M18335	IPF	6	3.86491	5	0.569025	0.0305535	0.0265381	0.313741	0.319052
107	indolelactate	M18349	IPF	6	6.52112	5	0.258759	0.000804817	0.0116303	0.948152	0.161523
108	glycylvaline	M18357	IPF	6	7.51242	5	0.185234	0.0335507	0.029474	0.318539	0.0243821
109	gamma-glutamylleucine	M18369	IPF	6	8.89397	5	0.113369	0.0111592	0.00739723	0.205906	0.0884447
110	theobromine	M18392	IPF	6	11.326	5	0.0452853	0.0521201	0.025012	0.105568	0.0350877
111	theophylline	M18394	IPF	6	6.8602	5	0.231247	0.045562	0.0192327	0.0769062	0.0926507
112	eicosapentaenoate (EPA; 20:5n3)	M18467	IPF	6	7.25839	5	0.202122	-0.0130001	0.0146929	0.426249	0.0743483
113	estrone 3-sulfate	M18474	IPF	6	8.24713	5	0.143132	0.00462045	0.0573331	0.93964	0.0142586
114	glycocholate	M18476	IPF	6	2.65072	5	0.753645	0.016053	0.0196337	0.459476	0.497992
115	glycodeoxycholate	M18477	IPF	6	1.409	5	0.923326	0.00786075	0.0445586	0.868541	0.379795
116	taurochenodeoxycholate	M18494	IPF	6	5.21078	5	0.390702	0.0124064	0.0244695	0.638819	0.152844
117	taurocholate	M18497	IPF	6	6.09511	5	0.297074	0.0161003	0.0348439	0.668045	0.00488131
118	X-05907	M18929	IPF	6	6.26252	5	0.281506	0.00387122	0.00984151	0.714121	0.215935
119	docosahexaenoate (DHA; 22:6n3)	M19323	IPF	6	3.5755	5	0.611995	-0.0149851	0.0113763	0.258153	0.140074
120	1-stearoylglycerophosphoinositol	M19324	IPF	6	3.34234	5	0.647365	-0.00638817	0.0117131	0.614474	0.527325
121	X-06226	M19362	IPF	6	4.91588	5	0.426233	0.00322231	0.0079515	0.706035	0.33946
122	X-06246	M19364	IPF	6	5.3371	5	0.376139	0.0180697	0.00892079	0.11278	0.0661936
123	X-06267	M19368	IPF	6	8.69933	5	0.121675	0.00362911	0.0134653	0.800865	0.0818026
124	X-06307	M19396	IPF	6	1.51649	5	0.911159	0.0105993	0.0117041	0.41636	0.903567
125	X-06350	M19414	IPF	6	3.8484	5	0.571442	0.00126116	0.0109966	0.91422	0.260909
126	X-06351	M19415	IPF	6	9.60832	5	0.0871251	0.0210483	0.0171659	0.287383	0.0359204
127	myo-inositol	M19934	IPF	6	6.49586	5	0.260912	0.0015463	0.00769846	0.85061	0.202159
128	glucose	M20489	IPF	6	7.23251	5	0.203915	0.00692127	0.00640869	0.34092	0.161367
129	1,5-anhydroglucitol (1,5-AG)	M20675	IPF	6	3.96067	5	0.555092	-0.00975748	0.0094039	0.35806	0.388776
130	erythritol	M20699	IPF	6	3.24253	5	0.662651	0.0126899	0.00809701	0.192127	0.584308
131	2-hydroxybutyrate (AHB)	M21044	IPF	6	2.71333	5	0.744078	-0.000706305	0.0106424	0.95027	0.718927
132	3-methyl-2-oxobutyrate	M21047	IPF	6	0.29413	5	0.997752	0.0011043	0.00689596	0.880535	0.829715
133	1,6-anhydroglucose	M21049	IPF	6	10.3262	5	0.0665033	-0.01127	0.0387672	0.785724	0.00725356
134	1-palmitoylglycerol (1-monopalmitin)	M21127	IPF	6	1.67567	5	0.89195	-0.00925019	0.00958991	0.38938	0.874374
135	saccharin	M21151	IPF	6	2.13107	5	0.830728	0.0246635	0.0375226	0.546888	0.418627
136	1-oleoylglycerol (1-monoolein)	M21184	IPF	6	3.86932	5	0.56838	0.0167223	0.0170309	0.381752	0.390194
137	1-stearoylglycerol (1-monostearin)	M21188	IPF	6	2.13545	5	0.830103	0.0106878	0.00930332	0.314658	0.664961
138	X-08402	M21630	IPF	6	4.30722	5	0.506083	0.0055322	0.00882634	0.564797	0.152184
139	2-hydroxyisobutyrate	M22030	IPF	6	11.0143	5	0.0510976	0.0114334	0.0134846	0.444257	0.0173327
140	X-08766	M22032	IPF	6	7.12186	5	0.211734	-0.0080989	0.0147644	0.612499	0.1198
141	4-methyl-2-oxopentanoate	M22116	IPF	6	4.37481	5	0.496806	-0.00233703	0.00754841	0.772319	0.404282
142	phenyllactate (PLA)	M22130	IPF	6	7.2578	5	0.202163	0.00213474	0.012011	0.867571	0.111309
143	homocitrulline	M22138	IPF	6	2.75374	5	0.737888	0.00332171	0.0131991	0.813704	0.471079
144	aspartylphenylalanine	M22175	IPF	6	2.7454	5	0.739167	0.00862793	0.0173934	0.64588	0.425628
145	levulinate (4-oxovalerate)	M22177	IPF	6	3.45733	5	0.629853	0.00358123	0.00716991	0.643664	0.509464
146	palmitoylcarnitine	M22189	IPF	5	6.85373	4	0.143823	0.0220009	0.0164316	0.273007	0.0061103
147	X-08988	M22481	IPF	6	7.42253	5	0.191065	0.00590336	0.0111669	0.625024	0.0984996
148	X-09026	M22548	IPF	6	10.2425	5	0.0686489	0.0218383	0.00836614	0.0594004	0.0534979
149	X-09108	M22649	IPF	6	6.8618	5	0.231123	-0.00177001	0.0106109	0.875612	0.108494
150	cholate	M22842	IPF	6	4.74311	5	0.448029	-0.0106307	0.0371383	0.788903	0.215883
151	X-09706	M24074	IPF	6	3.55438	5	0.615176	-0.00481737	0.00839344	0.596735	0.54266
152	X-10395	M25459	IPF	6	5.45888	5	0.362476	0.00459386	0.00770635	0.583194	0.241504
153	X-10429	M25599	IPF	6	5.38223	5	0.371032	0.0053889	0.0104922	0.634592	0.178169
154	X-10500	M27256	IPF	6	2.99157	5	0.701286	0.00134025	0.00555426	0.821186	0.575336
155	X-10506	M27273	IPF	6	5.21368	5	0.390363	0.00563889	0.00841366	0.539433	0.168102
156	X-10510	M27278	IPF	6	2.45722	5	0.782923	-0.000923711	0.00844724	0.918191	0.768508
157	1-linoleoylglycerol (1-monolinolein)	M27447	IPF	6	2.91326	5	0.713356	0.0274894	0.0204276	0.249616	0.331171
158	indoleacetate	M27513	IPF	6	3.41306	5	0.636581	0.00760653	0.0111569	0.53281	0.559279
159	hyodeoxycholate	M27531	IPF	6	4.77755	5	0.443627	-0.0179275	0.0241783	0.49958	0.281268
160	3-indoxyl sulfate	M27672	IPF	6	7.17587	5	0.207886	0.0138547	0.0152844	0.415959	0.121426
161	N-acetylglycine	M27710	IPF	6	4.8007	5	0.440685	-0.0224015	0.0153741	0.218819	0.13027
162	bilirubin (Z,Z)	M27716	IPF	6	4.02555	5	0.545744	-0.0129681	0.0203291	0.558221	0.348817
163	creatine	M27718	IPF	6	1.81608	5	0.873964	7.54463e-05	0.0122521	0.995382	0.952419
164	erythrose	M27722	IPF	6	7.81223	5	0.166892	-0.00363418	0.0178438	0.848556	0.119254
165	glycerol 2-phosphate	M27728	IPF	6	9.83859	5	0.0799401	0.0057193	0.0146141	0.715487	0.0201433
166	threonate	M27738	IPF	6	1.83292	5	0.871747	-0.00810059	0.0121625	0.541837	0.934212
167	X-10810	M30805	IPF	6	9.69119	5	0.0844733	0.00842419	0.0136085	0.569406	0.0451955
168	cysteine	M31453	IPF	6	4.62395	5	0.463473	-0.0124845	0.00812642	0.199275	0.371772
169	pyroglutamylglycine	M31522	IPF	6	1.96688	5	0.853708	-0.017932	0.0270425	0.543525	0.417806
170	N-(2-furoyl)glycine	M31536	IPF	6	5.87823	5	0.318248	-0.0183259	0.058456	0.769569	0.00479794
171	DSGEGDFXAEGGGVR*	M31548	IPF	6	2.64173	5	0.755015	-0.0165886	0.0210482	0.474704	0.51438
172	pyridoxate	M31555	IPF	6	4.50971	5	0.478585	0.00345964	0.0137995	0.814391	0.307829
173	androsterone sulfate	M31591	IPF	6	1.19315	5	0.945533	0.00396643	0.0217953	0.864444	0.916508
174	3-carboxy-4-methyl-5-propyl-2-furanpropanoate (CMPF)	M31787	IPF	6	7.24161	5	0.203283	-0.0100938	0.0350578	0.787711	0.0905377
175	3-(4-hydroxyphenyl)lactate	M32197	IPF	6	4.31239	5	0.50537	0.0117314	0.0089494	0.260097	0.418409
176	acetylcarnitine	M32198	IPF	6	4.69103	5	0.454738	-0.00411353	0.00870334	0.661106	0.344267
177	serine	M32315	IPF	6	2.14716	5	0.82843	-0.00869521	0.00733594	0.301508	0.589325
178	trans-4-hydroxyproline	M32319	IPF	6	1.92142	5	0.859908	0.011966	0.0125158	0.393176	0.524519
179	glutamate	M32322	IPF	6	2.29861	5	0.806471	0.00343407	0.0117599	0.784795	0.636025
180	hexanoylcarnitine	M32328	IPF	6	4.69264	5	0.454529	0.00459085	0.0116292	0.71316	0.234449
181	glycine	M32338	IPF	6	2.40841	5	0.790221	0.00950619	0.00830002	0.315944	0.753857
182	alanine	M32339	IPF	6	6.87005	5	0.230485	0.0144147	0.00634164	0.0854415	0.0493251
183	glycochenodeoxycholate	M32346	IPF	6	2.56635	5	0.766471	0.00178931	0.0246931	0.945713	0.258786
184	2-aminobutyrate	M32348	IPF	6	1.55837	5	0.906238	0.000137277	0.00665216	0.984524	0.970158
185	scyllo-inositol	M32379	IPF	6	7.25624	5	0.202271	0.00819461	0.0186336	0.682816	0.128759
186	dodecanedioate	M32388	IPF	6	6.05706	5	0.300707	0.0157209	0.0134221	0.3065	0.181062
187	gamma-glutamylvaline	M32393	IPF	6	6.02839	5	0.303466	0.0018231	0.00946878	0.856701	0.241737
188	indolepropionate	M32405	IPF	6	9.16703	5	0.102584	-0.000632782	0.0196648	0.975871	0.0784164
189	butyrylcarnitine	M32412	IPF	6	3.6668	5	0.598312	0.0132194	0.0135231	0.38365	0.503539
190	myristoleate (14:1n5)	M32418	IPF	6	9.56539	5	0.088529	-0.00831469	0.0183315	0.673654	0.0429592
191	dehydroisoandrosterone sulfate (DHEA-S)	M32425	IPF	6	1.53174	5	0.909378	0.00166727	0.0165141	0.92444	0.996847
192	3-methylxanthine	M32445	IPF	6	2.16339	5	0.826106	0.0165924	0.0180354	0.409638	0.587953
193	propionylcarnitine	M32452	IPF	6	2.78728	5	0.732741	0.00868255	0.00698402	0.281684	0.0814935
194	caproate (6:0)	M32489	IPF	6	9.41088	5	0.0937557	0.00512818	0.00962733	0.622479	0.0719658
195	caprylate (8:0)	M32492	IPF	6	6.92066	5	0.226608	0.00457342	0.00814096	0.604252	0.071172
196	10-undecenoate (11:1n1)	M32497	IPF	6	5.75581	5	0.330709	-0.00431701	0.0110319	0.715511	0.218695
197	docosapentaenoate (n3 DPA; 22:5n3)	M32504	IPF	6	5.54753	5	0.352763	-0.0134778	0.01231	0.33508	0.176041
198	X-11204	M32518	IPF	6	3.26394	5	0.659367	0.000975337	0.00587649	0.87623	0.59156
199	X-02269	M32549	IPF	6	3.38172	5	0.641356	-0.0376564	0.0224861	0.169314	0.276419
200	phenol sulfate	M32553	IPF	6	3.85087	5	0.57108	-0.00244916	0.0170669	0.892832	0.345706
201	X-06126	M32557	IPF	6	0.399159	5	0.995353	-0.00245704	0.0192515	0.904602	0.538778
202	X-07765	M32560	IPF	6	4.01836	5	0.546776	-0.0235315	0.0304974	0.483409	0.0447362
203	X-11247	M32564	IPF	6	5.46905	5	0.361351	0.0330466	0.0254837	0.264456	0.27877
204	X-11261	M32578	IPF	6	4.48671	5	0.481663	0.0133834	0.0154018	0.433906	0.398701
205	bilirubin (E,E)*	M32586	IPF	6	10.4993	5	0.0622614	0.00600561	0.0307862	0.854842	0.0289358
206	X-02249	M32587	IPF	6	5.78118	5	0.328097	0.0121391	0.0136671	0.42462	0.242646
207	heme*	M32593	IPF	5	6.11234	4	0.190914	0.0132191	0.0229373	0.604799	0.0130223
208	X-11299	M32616	IPF	6	4.79317	5	0.44164	-0.0466839	0.0311827	0.208711	0.195886
209	X-11315	M32632	IPF	6	3.15089	5	0.676736	-0.0124774	0.00979525	0.271711	0.624043
210	X-11317	M32634	IPF	6	4.75799	5	0.446124	0.00947363	0.00628278	0.206075	0.305624
211	1-linoleoylglycerophosphoethanolamine*	M32635	IPF	6	1.15993	5	0.948663	0.0075592	0.0115238	0.547664	0.410247
212	X-11327	M32644	IPF	6	3.82916	5	0.574265	0.00780339	0.00657693	0.301088	0.429235
213	X-11334	M32651	IPF	6	4.40026	5	0.493338	0.0112716	0.00961182	0.305995	0.296759
214	3-dehydrocarnitine*	M32654	IPF	6	2.46419	5	0.781879	0.00618455	0.00809701	0.487549	0.143676
215	pyroglutamine*	M32672	IPF	6	5.56137	5	0.351264	0.00355525	0.0147971	0.821935	0.193976
216	C-glycosyltryptophan*	M32675	IPF	6	4.06197	5	0.540529	-0.000629597	0.00544708	0.913552	0.451783
217	X-11374	M32691	IPF	6	7.80325	5	0.167417	0.0202937	0.0267347	0.490078	0.0422323
218	X-11381	M32698	IPF	6	4.91389	5	0.426479	0.0114436	0.00757814	0.205539	0.0326277
219	X-03056--N-[3-(2-Oxopyrrolidin-1-yl)propyl]acetamide	M32709	IPF	6	3.64792	5	0.601133	-0.0106179	0.00910198	0.308199	0.422438
220	X-11412	M32729	IPF	6	2.79263	5	0.731919	0.00684358	0.00695325	0.380726	0.166846
221	X-01911	M32735	IPF	6	4.37602	5	0.496641	0.022507	0.0213408	0.351075	0.341732
222	X-11422--xanthine	M32739	IPF	6	4.47515	5	0.483215	0.00764949	0.00952423	0.466894	0.292024
223	X-11423--O-sulfo-L-tyrosine	M32740	IPF	6	5.88491	5	0.31758	0.010828	0.00607148	0.14909	0.254912
224	X-09789	M32753	IPF	6	7.97488	5	0.157626	-0.018653	0.0242354	0.484433	0.124496
225	X-11437	M32754	IPF	6	0.925674	5	0.968335	0.0145271	0.0303578	0.657255	0.877603
226	X-11438	M32755	IPF	6	4.18399	5	0.523241	-0.0208745	0.0121857	0.161866	0.365929
227	X-11440	M32757	IPF	6	7.32312	5	0.197697	0.0153073	0.0216208	0.518024	0.135804
228	X-11441	M32758	IPF	6	1.68283	5	0.891056	-0.000884883	0.0148016	0.955196	0.226633
229	X-11442	M32759	IPF	6	0.727029	5	0.981452	-0.00291804	0.0147268	0.852594	0.241063
230	X-11444	M32761	IPF	6	10.7656	5	0.056231	0.0267988	0.0131734	0.111664	0.0461788
231	X-11445--5-alpha-pregnan-3beta,20alpha-disulfate	M32762	IPF	6	4.42943	5	0.48938	-0.00618427	0.0294284	0.843824	0.175726
232	X-11452	M32769	IPF	6	5.97467	5	0.308692	0.00365979	0.0245235	0.888589	0.203366
233	X-11469	M32786	IPF	6	4.92333	5	0.425308	-0.0288246	0.0208528	0.239053	0.214013
234	X-11470	M32787	IPF	6	6.89981	5	0.228199	0.0168713	0.0129381	0.26221	0.165322
235	X-11478	M32795	IPF	6	1.97737	5	0.852268	-0.000183165	0.0164027	0.991625	0.225474
236	X-11483	M32800	IPF	6	2.49403	5	0.777394	-0.0274389	0.0222021	0.284124	0.547557
237	X-11485	M32802	IPF	6	0.792202	5	0.977528	-0.000134321	0.0184795	0.994549	0.92684
238	X-11491	M32808	IPF	6	6.55586	5	0.255821	-0.0350897	0.0200481	0.154966	0.165063
239	X-11497	M32814	IPF	6	6.95888	5	0.223717	0.00634428	0.0107836	0.587926	0.0481286
240	HWESASXX*	M32836	IPF	6	1.95781	5	0.854952	0.000122315	0.017179	0.99466	0.302839
241	X-11521	M32838	IPF	6	1.76188	5	0.881013	0.00458177	0.0131661	0.745383	0.758162
242	X-11529	M32846	IPF	6	3.06318	5	0.690246	-0.0286328	0.022828	0.278033	0.555253
243	X-11530	M32847	IPF	6	2.21051	5	0.819316	-0.00403054	0.0146893	0.797376	0.123268
244	X-11537	M32854	IPF	6	2.11663	5	0.832783	-0.0208532	0.020918	0.375234	0.276492
245	X-11538	M32855	IPF	6	2.45065	5	0.783909	-0.01945	0.0139607	0.235989	0.765005
246	X-11540	M32857	IPF	6	2.94098	5	0.709085	-0.0141932	0.0207389	0.531331	0.197868
247	X-11546	M32863	IPF	6	1.51248	5	0.911625	0.0274107	0.0346892	0.473631	0.529075
248	X-11550	M32867	IPF	6	2.28897	5	0.807886	-0.00302844	0.00423152	0.513741	0.684037
249	X-11552	M32869	IPF	6	8.54226	5	0.128775	-0.0127687	0.0220844	0.594134	0.0209782
250	X-11593--O-methylascorbate*	M32910	IPF	6	0.535889	5	0.99075	0.00301096	0.00614113	0.649603	0.814298
251	adrenate (22:4n6)	M32980	IPF	6	5.81655	5	0.324481	-0.0105874	0.0121587	0.43302	0.258529
252	homostachydrine*	M33009	IPF	6	4.26278	5	0.512235	0.0115294	0.0209965	0.612143	0.0741793
253	ADSGEGDFXAEGGGVR*	M33084	IPF	6	7.63391	5	0.177599	-0.0157752	0.0190924	0.455095	0.0965328
254	X-11786--methylcysteine	M33131	IPF	6	7.83304	5	0.165681	0.000213566	0.0226027	0.992914	0.0434035
255	X-11787	M33132	IPF	6	10.4101	5	0.0644146	0.00656772	0.00764599	0.438783	0.0523359
256	X-11792	M33137	IPF	6	3.83496	5	0.573414	0.0174611	0.030052	0.592387	0.182611
257	X-11793--oxidized bilirubin*	M33138	IPF	6	1.87744	5	0.86583	0.0129888	0.0139572	0.404732	0.490993
258	X-11795	M33140	IPF	6	6.56035	5	0.255443	0.00333606	0.0143833	0.827968	0.145181
259	X-11799	M33144	IPF	6	6.10792	5	0.295859	0.0173618	0.0332478	0.629119	0.0560234
260	X-11805	M33150	IPF	6	3.93346	5	0.559035	0.0261587	0.0262874	0.376008	0.178121
261	X-11818	M33163	IPF	6	5.68569	5	0.338014	0.00633019	0.0110992	0.598964	0.16761
262	X-11820	M33165	IPF	6	3.95826	5	0.555441	0.00110904	0.0132447	0.937291	0.42118
263	2-hydroxyacetaminophen sulfate*	M33173	IPF	6	9.62619	5	0.086547	0.0195611	0.108884	0.86616	0.0111988
264	2-methoxyacetaminophen sulfate*	M33178	IPF	6	1.48923	5	0.91431	-0.0150714	0.0590628	0.811171	0.410577
265	X-11843	M33188	IPF	6	4.98053	5	0.418261	-0.0437294	0.0312843	0.234708	0.145154
266	X-11845	M33190	IPF	6	6.446	5	0.265207	-0.0492342	0.0376586	0.261168	0.0766767
267	X-11847	M33192	IPF	6	7.25538	5	0.202329	-0.0133461	0.0447694	0.780464	0.00948659
268	X-11849	M33194	IPF	6	3.47636	5	0.626967	-0.0290912	0.0347425	0.449515	0.286473
269	X-11850	M33195	IPF	6	5.33149	5	0.376778	-0.026904	0.0344645	0.478636	0.150897
270	X-11852	M33197	IPF	6	4.40014	5	0.493355	-0.014899	0.0362795	0.702359	0.164617
271	X-11858	M33203	IPF	6	4.11906	5	0.532405	-0.00758569	0.0416042	0.864191	0.156436
272	X-11859	M33204	IPF	6	6.5465	5	0.25661	-0.00998134	0.0117259	0.442605	0.0750724
273	X-11876	M33221	IPF	6	5.5763	5	0.349652	-0.000930021	0.0174846	0.96013	0.111534
274	1-arachidonoylglycerophosphocholine*	M33228	IPF	6	6.00124	5	0.306098	0.0201572	0.00958991	0.10343	0.185242
275	1-palmitoleoylglycerophosphocholine*	M33230	IPF	6	10.6358	5	0.0590978	0.00619903	0.0181096	0.74935	0.0376896
276	X-11905	M33250	IPF	6	4.77601	5	0.443823	-0.00194833	0.0183645	0.920617	0.13258
277	X-12007	M33353	IPF	6	1.48611	5	0.914667	-0.00481671	0.0295962	0.878608	0.430666
278	X-12013	M33359	IPF	6	5.45638	5	0.362753	-0.05437	0.0311014	0.155351	0.0776296
279	gamma-glutamylmethionine*	M33363	IPF	6	1.14831	5	0.949739	-0.0108773	0.0124866	0.432853	0.713605
280	gamma-glutamylthreonine*	M33364	IPF	6	3.28831	5	0.655633	0.0120557	0.0115631	0.355999	0.380745
281	X-12029	M33380	IPF	6	4.52258	5	0.476868	-0.00383747	0.00558557	0.529822	0.210169
282	salicyluric glucuronide*	M33384	IPF	6	2.60638	5	0.760396	-0.00652587	0.0724588	0.932567	0.228053
283	X-12038	M33389	IPF	6	3.17536	5	0.672971	0.00693666	0.00684846	0.368407	0.608294
284	X-12039	M33390	IPF	6	6.86441	5	0.230921	-0.00414687	0.0312577	0.900863	0.103717
285	X-12040	M33391	IPF	6	2.11896	5	0.832452	0.0286606	0.0508421	0.60305	0.225371
286	X-12056	M33408	IPF	6	3.32041	5	0.650718	-0.0206959	0.0238283	0.434104	0.345714
287	X-12063	M33415	IPF	6	5.74955	5	0.331357	0.0316078	0.0172879	0.141504	0.235595
288	gamma-tocopherol	M33420	IPF	6	3.30291	5	0.653396	0.0164782	0.0169298	0.385507	0.48985
289	gamma-glutamylphenylalanine	M33422	IPF	6	3.59785	5	0.608637	0.00462229	0.005795	0.469753	0.364322
290	p-acetamidophenylglucuronide	M33423	IPF	5	12.1156	4	0.0165117	-0.179899	0.189108	0.411633	8.42432e-05
291	isobutyrylcarnitine	M33441	IPF	6	2.52943	5	0.772057	0.00766719	0.0126291	0.576556	0.686038
292	pseudouridine	M33442	IPF	6	11.5928	5	0.0408141	0.0110704	0.00702717	0.190294	0.0346392
293	valerate	M33443	IPF	5	6.09656	4	0.192052	-0.00706298	0.0157235	0.683756	0.00640676
294	palmitoleate (16:1n7)	M33447	IPF	6	9.6866	5	0.0846182	-0.0113631	0.0178455	0.558903	0.0308665
295	alpha-ketoglutarate	M33453	IPF	6	5.02794	5	0.41248	0.0212739	0.0128983	0.17442	0.216826
296	erythronate*	M33477	IPF	6	3.01865	5	0.69711	0.00917239	0.00649534	0.230762	0.596883
297	lathosterol	M33488	IPF	6	6.33296	5	0.275155	0.032413	0.0158418	0.110185	0.143365
298	X-12092	M33507	IPF	6	3.19697	5	0.669649	0.00354342	0.0170749	0.845739	0.57396
299	X-12093	M33508	IPF	6	10.8791	5	0.0538296	-0.0127358	0.0344625	0.730447	0.0111017
300	X-12094	M33509	IPF	6	4.17242	5	0.524868	0.000947014	0.0121286	0.941513	0.393855
301	X-12095--N1-methyl-3-pyridone-4-carboxamide	M33510	IPF	6	3.75319	5	0.585468	0.0125914	0.00961218	0.26038	0.302572
302	X-12100--hydroxytryptophan*	M33515	IPF	6	12.9335	5	0.0240097	0.0100663	0.0107586	0.402422	0.017808
303	X-12116	M33531	IPF	6	3.71239	5	0.591521	-0.0151002	0.020808	0.508212	0.194185
304	eicosenoate (20:1n9 or 11)	M33587	IPF	6	6.63749	5	0.249026	-0.0216816	0.0130184	0.17115	0.0671213
305	X-12188	M33609	IPF	6	5.55837	5	0.351587	-0.0268845	0.0382984	0.521392	0.0246074
306	X-12189	M33610	IPF	6	1.90831	5	0.861682	0.0172077	0.0377447	0.672117	0.290507
307	X-12206	M33627	IPF	6	3.68673	5	0.59534	-0.0174503	0.0114272	0.201448	0.223849
308	X-12212	M33633	IPF	6	8.43715	5	0.133733	0.0380798	0.0247686	0.199007	0.0376982
309	X-12216	M33637	IPF	6	3.34213	5	0.647398	0.00323127	0.0154035	0.844095	0.300838
310	X-12217	M33638	IPF	6	3.31857	5	0.650999	-0.00578552	0.0151269	0.721569	0.475547
311	X-12230	M33652	IPF	6	10.3449	5	0.0660329	-0.00829702	0.0324064	0.810555	0.0315648
312	X-12231	M33653	IPF	6	4.2551	5	0.513303	-0.0074002	0.0174735	0.693704	0.307366
313	X-12236	M33658	IPF	5	4.43083	4	0.350828	0.0661832	0.0367914	0.169871	0.000346773
314	X-12244--N-acetylcarnosine	M33666	IPF	6	10.7191	5	0.0572429	0.00554027	0.0123784	0.677628	0.0374742
315	X-12253	M33675	IPF	6	6.28492	5	0.279474	-0.0388316	0.0204839	0.130885	0.158622
316	X-12261	M33683	IPF	6	2.25054	5	0.813503	-0.014386	0.0325166	0.681055	0.115469
317	X-12329	M33751	IPF	6	5.60722	5	0.346332	0.0131385	0.0559767	0.825956	0.0257889
318	X-10346	M33782	IPF	6	7.73461	5	0.171481	-0.0109108	0.0405391	0.801132	0.0666108
319	ADpSGEGDFXAEGGGVR*	M33801	IPF	6	2.83312	5	0.725695	-0.00743047	0.0191664	0.717997	0.441837
320	1-eicosatrienoylglycerophosphocholine*	M33821	IPF	6	3.4109	5	0.63691	0.011708	0.0112961	0.358528	0.572074
321	1-docosahexaenoylglycerophosphocholine*	M33822	IPF	6	3.77957	5	0.581568	-0.015319	0.0117041	0.260714	0.0694717
322	X-12405	M33833	IPF	6	5.87637	5	0.318435	0.0132935	0.014275	0.404445	0.20853
323	X-12407	M33835	IPF	6	5.69998	5	0.336515	-0.022671	0.0298492	0.489841	0.106896
324	X-12428	M33864	IPF	6	1.8162	5	0.873948	-0.0234461	0.0255352	0.410476	0.00475959
325	1-eicosadienoylglycerophosphocholine*	M33871	IPF	6	3.97948	5	0.552373	-0.00361125	0.012213	0.782182	0.431817
326	X-12435	M33877	IPF	6	2.99122	5	0.70134	-0.00657503	0.0651532	0.924473	0.101678
327	X-12441--12-hydroxyeicosatetraenoate (12-HETE)	M33883	IPF	6	3.90482	5	0.5632	-0.022166	0.0350992	0.561988	0.232827
328	X-12442--5,8-tetradecadienoate	M33884	IPF	6	12.4527	5	0.029085	-0.0188967	0.022693	0.451838	0.0081574
329	X-12443	M33885	IPF	6	13.2297	5	0.0213191	-0.011119	0.0488615	0.831145	0.00467108
330	X-12450	M33892	IPF	6	6.21798	5	0.285583	0.00176595	0.0136366	0.903212	0.123052
331	X-12456	M33901	IPF	6	8.90998	5	0.112709	0.0263456	0.0188748	0.235264	0.0455893
332	X-12465	M33910	IPF	6	3.56824	5	0.613088	0.0110333	0.0153002	0.510731	0.327161
333	piperine	M33935	IPF	6	9.81067	5	0.0807811	0.0140706	0.0393936	0.739004	0.0582739
334	octanoylcarnitine	M33936	IPF	6	6.24853	5	0.282782	0.00185604	0.0152362	0.908918	0.118251
335	alpha-hydroxyisovalerate	M33937	IPF	6	8.73591	5	0.120073	0.0186982	0.0151312	0.284167	0.0892096
336	N-acetylthreonine	M33939	IPF	6	1.77908	5	0.878791	-0.00255784	0.00825814	0.772227	0.768954
337	decanoylcarnitine	M33941	IPF	6	8.6084	5	0.125741	0.00141243	0.0200626	0.947254	0.0654062
338	1-palmitoylglycerophosphocholine	M33955	IPF	6	8.9391	5	0.111518	0.0034215	0.00923291	0.729743	0.057446
339	1-heptadecanoylglycerophosphocholine	M33957	IPF	6	2.42213	5	0.788174	-0.00946938	0.0128551	0.502219	0.575754
340	1-oleoylglycerophosphocholine	M33960	IPF	6	9.65124	5	0.0857424	0.00226043	0.0138553	0.878314	0.0301651
341	1-stearoylglycerophosphocholine	M33961	IPF	6	4.60505	5	0.465953	-0.00575775	0.0117679	0.650265	0.264108
342	5-dodecenoate (12:1n7)	M33968	IPF	6	11.0786	5	0.0498435	-0.0141765	0.0214252	0.544352	0.0233931
343	stearidonate (18:4n3)	M33969	IPF	6	6.04092	5	0.302257	-0.00918687	0.01552	0.585729	0.0649961
344	10-heptadecenoate (17:1n7)	M33971	IPF	6	8.60726	5	0.125792	-0.0168592	0.0138461	0.290286	0.0779358
345	10-nonadecenoate (19:1n9)	M33972	IPF	6	6.32105	5	0.27622	-0.0124351	0.0133657	0.404841	0.145896
346	epiandrosterone sulfate	M33973	IPF	6	0.483773	5	0.992705	-0.00178098	0.0196913	0.932282	0.821108
347	linolenate [alpha or gamma; (18:3n3 or 6)]	M34035	IPF	6	6.53692	5	0.25742	-0.0100602	0.0138034	0.506493	0.0432497
348	X-12510--2-aminooctanoic acid	M34040	IPF	6	1.84915	5	0.8696	0.00175187	0.0128726	0.898322	0.718547
349	X-12524	M34062	IPF	6	1.86059	5	0.868079	-9.34398e-05	0.00537127	0.986954	0.505212
350	bilirubin (E,Z or Z,E)*	M34106	IPF	6	4.03782	5	0.543984	0.00270095	0.0174046	0.884191	0.260904
351	metoprolol acid metabolite*	M34109	IPF	6	6.25866	5	0.281857	0.121304	0.073555	0.17446	0.0234882
352	X-12544	M34112	IPF	6	1.96941	5	0.853361	-0.0225749	0.0202638	0.327683	0.678072
353	X-12556	M34123	IPF	6	7.25918	5	0.202068	0.00415294	0.0119007	0.74471	0.144755
354	1-arachidonoylglycerophosphoinositol*	M34214	IPF	6	5.04787	5	0.410066	0.00478258	0.00985637	0.652892	0.338369
355	X-12627	M34221	IPF	6	4.59526	5	0.46724	-0.0199097	0.0143663	0.238047	0.373006
356	X-12644	M34244	IPF	6	1.90387	5	0.86228	0.00214266	0.00970875	0.836138	0.453585
357	X-12645	M34245	IPF	6	1.99174	5	0.850286	-0.00660787	0.0147616	0.677587	0.718051
358	asparagine	M34283	IPF	6	3.51482	5	0.621146	0.000153573	0.00642869	0.982086	0.498572
359	X-12680	M34289	IPF	6	2.35646	5	0.79794	0.0122306	0.0136621	0.421271	0.407497
360	X-12696	M34306	IPF	6	3.33225	5	0.648907	-0.00350916	0.00910665	0.7196	0.562369
361	X-12704	M34314	IPF	6	3.92681	5	0.560001	0.0365341	0.0279093	0.26066	0.172739
362	X-12712	M34322	IPF	6	3.58852	5	0.610038	0.00791842	0.0413459	0.85745	0.0199259
363	X-12717	M34327	IPF	6	10.1375	5	0.071433	0.0474078	0.0531947	0.423179	0.00951132
364	X-12719	M34329	IPF	6	3.15584	5	0.675974	-0.00733253	0.0305077	0.821875	0.190564
365	X-12726	M34336	IPF	6	2.29694	5	0.806717	0.00999565	0.0105696	0.397851	0.656153
366	X-12728	M34338	IPF	6	0.920119	5	0.968748	-0.0289188	0.0633227	0.671594	0.350714
367	X-12729	M34339	IPF	6	0.863101	5	0.972835	-0.00205972	0.0345401	0.955309	0.742619
368	X-12734	M34344	IPF	6	6.93926	5	0.225197	0.0585149	0.027537	0.100778	0.0850214
369	X-12740	M34350	IPF	6	1.0464	5	0.958737	0.0124029	0.0318342	0.71668	0.262199
370	X-12749	M34359	IPF	6	9.46721	5	0.0918181	0.0117133	0.00796253	0.215238	0.0585579
371	3-(cystein-S-yl)acetaminophen*	M34365	IPF	6	8.18005	5	0.146588	0.0646239	0.0878885	0.502945	0.0146122
372	stachydrine	M34384	IPF	6	4.31946	5	0.504396	-0.0203064	0.0422146	0.655625	0.160653
373	1-methylxanthine	M34389	IPF	6	6.85042	5	0.232005	0.0093119	0.0195389	0.658526	0.120118
374	7-methylxanthine	M34390	IPF	6	6.68346	5	0.245266	0.0367776	0.0179835	0.110305	0.142557
375	1-methylurate	M34395	IPF	6	8.07394	5	0.152208	0.0188526	0.0179162	0.352043	0.0783159
376	1,7-dimethylurate	M34400	IPF	6	6.72764	5	0.241697	0.0217261	0.016928	0.268645	0.129078
377	1,3,7-trimethylurate	M34404	IPF	6	1.20504	5	0.944393	0.0321424	0.0408999	0.475879	0.017357
378	isovalerylcarnitine	M34407	IPF	6	0.805089	5	0.976708	0.000608208	0.0107759	0.957697	0.883336
379	stearoylcarnitine	M34409	IPF	6	3.27575	5	0.657556	-0.00339831	0.0110874	0.774515	0.245146
380	1-stearoylglycerophosphoethanolamine	M34416	IPF	6	1.96466	5	0.854013	0.00276306	0.0118085	0.826482	0.83286
381	1-linoleoylglycerophosphocholine	M34419	IPF	6	3.10357	5	0.684022	0.00554508	0.00825814	0.538707	0.515122
382	bradykinin, des-arg(9)	M34420	IPF	6	1.27138	5	0.937848	0.0200904	0.0327152	0.572357	0.482906
383	X-12771	M34441	IPF	6	1.08984	5	0.954999	0.00218301	0.0151269	0.892232	0.707187
384	X-12776	M34453	IPF	6	2.8234	5	0.727189	-0.0049349	0.00420963	0.306134	0.544244
385	gamma-glutamylisoleucine*	M34456	IPF	6	4.40782	5	0.492311	0.00994546	0.00994017	0.373672	0.284853
386	X-12786	M34469	IPF	6	8.48481	5	0.131464	0.0211247	0.0180599	0.307063	0.0525344
387	X-12798	M34481	IPF	6	7.45241	5	0.189108	-0.00647483	0.0149996	0.688233	0.112964
388	X-12816	M34499	IPF	6	4.7326	5	0.449378	0.0392718	0.0268829	0.217852	0.217336
389	X-12830	M34513	IPF	6	12.9714	5	0.0236479	0.0208033	0.0346767	0.580888	0.0041694
390	X-12833	M34516	IPF	6	5.43659	5	0.364949	0.101585	0.0768182	0.256577	0.0233077
391	X-12844	M34527	IPF	6	5.09391	5	0.404527	0.0129336	0.0105621	0.287939	0.20533
392	X-12847	M34530	IPF	6	1.7695	5	0.88003	-0.00679004	0.0214871	0.7678	0.179333
393	X-12850	M34533	IPF	6	1.55148	5	0.907053	0.00380913	0.0188543	0.849753	0.422584
394	laurylcarnitine	M34534	IPF	6	2.84246	5	0.724258	-0.00444799	0.0163536	0.799092	0.280613
395	X-12851	M34535	IPF	6	1.52413	5	0.910269	0.0331161	0.0315488	0.353099	0.688734
396	X-12855	M34539	IPF	6	4.32923	5	0.503051	0.00692561	0.0140907	0.64882	0.2599
397	X-12990--docosapentaenoic acid (n6-DPA)	M34674	IPF	6	2.88658	5	0.717467	-0.00707565	0.016946	0.697721	0.17285
398	isovalerate	M34732	IPF	6	3.40232	5	0.638216	-0.00948876	0.00992972	0.393392	0.481581
399	X-13069	M34761	IPF	6	8.19931	5	0.145588	-0.0151454	0.0184977	0.45889	0.0653486
400	X-13183--stearamide	M34878	IPF	6	5.78167	5	0.328047	0.00176575	0.0234571	0.94361	0.0237748
401	X-13215	M34912	IPF	6	4.50532	5	0.479172	0.000591385	0.00760611	0.94176	0.279506
402	7-methylguanine	M35114	IPF	6	10.2791	5	0.0677019	0.0176479	0.0143963	0.287487	0.0130641
403	phenylacetylglutamine	M35126	IPF	6	6.55362	5	0.25601	-0.00868889	0.0212108	0.703054	0.202614
404	pro-hydroxy-pro	M35127	IPF	6	7.48158	5	0.187216	0.0195006	0.00890009	0.0935813	0.0885052
405	N2,N2-dimethylguanosine	M35137	IPF	6	3.67311	5	0.597371	0.0111585	0.00705347	0.188814	0.368586
406	cysteine-glutathione disulfide	M35159	IPF	6	5.35513	5	0.374093	-0.0382882	0.0194796	0.120783	0.100064
407	oleoylcarnitine	M35160	IPF	6	13.1399	5	0.0221026	-0.0078265	0.0216095	0.735543	0.00110717
408	1-arachidonoylglycerophosphoethanolamine*	M35186	IPF	6	6.84689	5	0.232278	0.0202934	0.0089494	0.0859583	0.0955748
409	X-13429	M35187	IPF	6	2.83174	5	0.725908	-0.008278	0.0215907	0.720925	0.37953
410	X-13431--nonanoylcarnitine*	M35189	IPF	6	3.11456	5	0.682329	0.00326247	0.0161791	0.850032	0.437274
411	X-13435	M35193	IPF	6	10.2481	5	0.0685029	0.0129984	0.0145499	0.422153	0.0326654
412	X-13477	M35240	IPF	6	7.06712	5	0.215696	0.0207032	0.00976935	0.101433	0.124883
413	2-palmitoylglycerophosphocholine*	M35253	IPF	6	3.57157	5	0.612587	0.00648507	0.00914321	0.517307	0.200119
414	2-oleoylglycerophosphocholine*	M35254	IPF	6	6.01992	5	0.304285	-0.00054473	0.011504	0.964503	0.0746444
415	2-stearoylglycerophosphocholine*	M35255	IPF	6	7.3933	5	0.192994	-0.00388445	0.0162419	0.822734	0.0525044
416	2-linoleoylglycerophosphocholine*	M35257	IPF	6	2.89856	5	0.715621	0.00345254	0.00977754	0.741829	0.142222
417	X-13496	M35270	IPF	6	2.20813	5	0.819661	0.00770143	0.00585036	0.258402	0.639293
418	1-palmitoylglycerophosphoinositol*	M35305	IPF	6	8.007	5	0.15585	0.00111388	0.0177653	0.953014	0.0947
419	catechol sulfate	M35320	IPF	6	10.9103	5	0.0531881	-0.000875647	0.022782	0.971182	0.0348742
420	hydroquinone sulfate	M35322	IPF	6	7.14675	5	0.209953	0.0169026	0.046267	0.733365	0.0131288
421	X-13548	M35326	IPF	6	10.7337	5	0.0569227	-0.016703	0.00614783	0.053157	0.0265152
422	X-13549	M35327	IPF	6	3.9342	5	0.558928	0.00251756	0.00552749	0.672406	0.463494
423	X-13553	M35331	IPF	6	3.71704	5	0.59083	0.0170659	0.0106056	0.182871	0.232262
424	X-13619	M35397	IPF	6	6.65857	5	0.247296	-0.0100059	0.00539575	0.137287	0.19632
425	2-methylbutyroylcarnitine	M35431	IPF	6	4.05346	5	0.541745	0.0137506	0.00831053	0.173348	0.176573
426	hydroxyisovaleroyl carnitine	M35433	IPF	6	4.79901	5	0.440899	0.00595564	0.0134349	0.680471	0.213962
427	glutaroyl carnitine	M35439	IPF	6	3.29529	5	0.654563	-0.00545392	0.00850097	0.556073	0.589582
428	X-13658	M35451	IPF	6	8.29698	5	0.14061	-0.0374445	0.0463149	0.464157	0.0186965
429	X-13671	M35464	IPF	6	3.58568	5	0.610465	-0.0017463	0.00855643	0.848245	0.353812
430	2-tetradecenoyl carnitine	M35472	IPF	6	10.0938	5	0.0726195	-0.0147963	0.0223062	0.543397	0.0105994
431	4-hydroxyhippurate	M35527	IPF	6	1.89781	5	0.863096	0.0208426	0.0253699	0.45748	0.386416
432	X-13741	M35551	IPF	6	4.56863	5	0.470754	0.0116096	0.0253873	0.671191	0.278873
433	1-myristoylglycerophosphocholine	M35626	IPF	6	3.87722	5	0.567226	0.0125485	0.012282	0.364685	0.492291
434	1-oleoylglycerophosphoethanolamine	M35628	IPF	6	4.16369	5	0.526097	0.00635897	0.0121625	0.628712	0.433874
435	1-palmitoylglycerophosphoethanolamine	M35631	IPF	6	4.30344	5	0.506605	-0.000441871	0.00935715	0.964599	0.359189
436	3-(3-hydroxyphenyl)propionate	M35635	IPF	6	0.802353	5	0.976883	0.0171695	0.0365685	0.663152	0.523645
437	tetradecanedioate	M35669	IPF	6	6.57735	5	0.254017	-0.0222655	0.017813	0.279454	0.0116554
438	2-hydroxypalmitate	M35675	IPF	6	7.68809	5	0.174284	-0.00988967	0.00769924	0.268312	0.138413
439	hexadecanedioate	M35678	IPF	6	0.763618	5	0.979296	-0.00955733	0.015224	0.564206	0.2804
440	dihomo-linolenate (20:3n3 or n6)	M35718	IPF	6	2.54803	5	0.769244	-0.00119713	0.00878212	0.898158	0.654077
441	X-13859	M35754	IPF	6	4.17645	5	0.524301	-0.00389464	0.00714768	0.614791	0.41078
442	threitol	M35854	IPF	6	5.35614	5	0.373979	0.0185854	0.0126394	0.215397	0.283791
443	X-14056	M35977	IPF	6	1.45701	5	0.917977	0.0103015	0.0116853	0.427792	0.177544
444	X-14057	M35978	IPF	6	3.78927	5	0.580137	0.0187092	0.0150211	0.280913	0.261758
445	X-14086	M36009	IPF	6	4.1181	5	0.532541	0.00824653	0.0175747	0.663341	0.186603
446	thymol sulfate	M36095	IPF	6	1.78603	5	0.877888	0.0446808	0.0383408	0.308628	0.66454
447	4-acetaminophen sulfate	M36097	IPF	4	3.08981	3	0.377984	-0.284966	0.181871	0.257658	0.000719105
448	4-vinylphenol sulfate	M36098	IPF	6	5.01048	5	0.414603	-0.0032855	0.0257592	0.904663	0.32229
449	4-ethylphenylsulfate	M36099	IPF	6	7.88843	5	0.162492	0.00506627	0.0360897	0.895145	0.0928161
450	p-cresol sulfate	M36103	IPF	6	7.02031	5	0.219134	-0.0214546	0.0220676	0.385994	0.168393
451	X-14189--leucylalanine	M36115	IPF	6	6.17026	5	0.290003	0.0231437	0.0218781	0.349779	0.0882569
452	X-14205--alpha-glutamyltyrosine	M36131	IPF	6	1.49099	5	0.914107	0.0040096	0.0185136	0.839136	0.502058
453	X-14208--phenylalanylserine	M36134	IPF	6	2.61429	5	0.759192	-0.00863175	0.020662	0.697573	0.261912
454	X-14304--leucylalanine	M36230	IPF	6	3.21654	5	0.666641	0.0211343	0.0206621	0.3642	0.248628
455	X-14374	M36300	IPF	6	13.5218	5	0.0189501	0.0237442	0.0154874	0.200018	0.0112092
456	X-14450--phenylalanylleucine	M36376	IPF	6	7.75896	5	0.17003	0.0304147	0.0267458	0.318962	0.0110971
457	X-14473	M36399	IPF	6	7.67586	5	0.175027	0.0336456	0.0156162	0.0974852	0.116758
458	X-14541	M36468	IPF	6	4.16583	5	0.525796	0.0295218	0.0227054	0.263385	0.0688794
459	X-14588	M36515	IPF	6	1.78521	5	0.877994	-0.000674382	0.00300418	0.833383	0.923128
460	X-14625	M36552	IPF	6	4.14782	5	0.528336	0.00153362	0.00706526	0.83878	0.40719
461	X-14626	M36553	IPF	6	10.2816	5	0.0676374	-0.0139062	0.0153469	0.416118	0.0427532
462	X-14632	M36559	IPF	6	1.83987	5	0.870829	-0.0195766	0.0180334	0.338713	0.358014
463	X-14658	M36585	IPF	6	6.17175	5	0.289864	0.0459011	0.0224584	0.110462	0.0788664
464	X-14662	M36589	IPF	6	4.05183	5	0.541978	0.0159509	0.0235543	0.535426	0.251546
465	X-14745	M36673	IPF	6	1.59909	5	0.901359	-0.00886789	0.012539	0.518451	0.338712
466	gamma-glutamylglutamate	M36738	IPF	6	4.5051	5	0.479202	0.0316955	0.0204322	0.195786	0.0499232
467	octadecanedioate	M36754	IPF	6	3.37421	5	0.642501	-0.0195244	0.012423	0.191133	0.552029
468	leucylleucine	M36756	IPF	6	8.72739	5	0.120444	0.0169548	0.0208701	0.462145	0.0336887
469	7-alpha-hydroxy-3-oxo-4-cholestenoate (7-Hoca)	M36776	IPF	6	7.05475	5	0.2166	-0.00688504	0.0102286	0.537761	0.162828
470	n-Butyl Oleate	M36802	IPF	6	1.56365	5	0.905609	-0.0015332	0.010296	0.888829	0.604803
471	dimethylarginine (SDMA + ADMA)	M36808	IPF	6	0.941951	5	0.967111	0.00115592	0.00555426	0.845307	0.849552
472	taurolithocholate 3-sulfate	M36850	IPF	6	4.01025	5	0.547941	-0.0311958	0.0211096	0.213528	0.317179
473	X-14977--vanillin	M37004	IPF	6	4.29536	5	0.507721	0.0134955	0.0150486	0.420524	0.0209415
474	succinylcarnitine	M37058	IPF	6	8.13306	5	0.149053	0.0177579	0.00695978	0.0632042	0.102638
475	tryptophan betaine	M37097	IPF	6	7.55819	5	0.182324	-0.0159539	0.0395369	0.707206	0.126357
476	cyclo(leu-pro)	M37104	IPF	6	4.29674	5	0.50753	0.0138891	0.0204209	0.533744	0.189925
477	chiro-inositol	M37112	IPF	6	3.7086	5	0.592085	-0.0311123	0.0460197	0.536073	0.222456
478	5alpha-androstan-3beta,17beta-diol disulfate	M37190	IPF	6	7.01657	5	0.219411	0.0515083	0.0220453	0.0796851	0.15725
479	4-androsten-3beta,17beta-diol disulfate 1*	M37202	IPF	6	6.40119	5	0.269114	0.0464142	0.021701	0.0992211	0.211475
480	4-androsten-3beta,17beta-diol disulfate 2*	M37203	IPF	6	3.21202	5	0.667336	0.00793024	0.0142132	0.606631	0.577474
481	2-hydroxyglutarate	M37253	IPF	6	3.17004	5	0.67379	0.0144616	0.0110982	0.262502	0.481349
482	ergothioneine	M37459	IPF	6	4.6045	5	0.466025	-0.00673755	0.0266389	0.812795	0.00244509
483	palmitoyl sphingomyelin	M37506	IPF	6	2.42635	5	0.787544	0.000737871	0.00633879	0.912941	0.720411
484	phenylalanylphenylalanine	M38150	IPF	6	1.84796	5	0.869758	0.00190391	0.0123931	0.885343	0.682188
485	cis-4-decenoyl carnitine	M38178	IPF	6	5.0763	5	0.406639	0.00663581	0.0134687	0.648055	0.231379
486	15-methylpalmitate (isobar with 2-methylpalmitate)	M38768	IPF	6	8.6402	5	0.124305	-0.0178672	0.00901239	0.11846	0.091577
