# Supplementary material for: The causal relationship between genetically predicted blood metabolites and idiopathic pulmonary fibrosis: A bidirectional two-sample Mendelian randomization study
Source: PLoS One. 2024 Apr 16;19(4):e0300423. doi: 10.1371/journal.pone.0300423 (PMC11020755; doi:10.1371/journal.pone.0300423)
Supplement: S14 Table — (XLSX) [file pone.0300423.s020.xlsx]

## Sheet: Sheet1
Supplementary Table S14: Characteristics of the genetic IVs used in TSMR analysis for the effect of IPF on blood metabolites (P < 5.00E-06, IPF GWAS from Allen et al.)
	SNP	exposure	outcome	effect_allele.exposure	other_allele.exposure	effect_allele.outcome	other_allele.outcome	beta.exposure	beta.outcome	eaf.exposure	eaf.outcome	se.exposure	se.outcome	pval.exposure	pval.outcome	samplesize.exposure	samplesize.outcome	R2	F
1	rs10967305	IPF	M00053.metal.pos.txt.gz	C	T	C	T	-0.1437	-0.001	0.4135	0.4087	0.0276121	0.0011	1.94795e-07	0.365	24589	7372	0.00110026	27.0819
2	rs11073517	IPF	M00053.metal.pos.txt.gz	C	T	C	T	-0.175	0.0008	0.7296	0.6801	0.0288768	0.0012	1.35927e-09	0.4822	24589	7372	0.00149138	36.7234
3	rs1123573	IPF	M00053.metal.pos.txt.gz	G	A	G	A	-0.1327	-0.0003	0.3867	0.392	0.0282445	0.0011	2.62378e-06	0.7905	24589	7372	0.000896902	22.0719
4	rs11788059	IPF	M00053.metal.pos.txt.gz	C	T	C	T	0.1547	-0.0008	0.3648	0.3236	0.0283498	0.0012	4.84737e-08	0.4914	24589	7372	0.00120952	29.7745
5	rs1214759	IPF	M00053.metal.pos.txt.gz	G	A	G	A	0.1652	-0.001	0.6292	0.669	0.0292984	0.0011	1.71495e-08	0.3915	24589	7372	0.00129131	31.7906
6	rs12610495	IPF	M00053.metal.pos.txt.gz	G	A	G	A	0.2495	-0.001	0.2942	0.292	0.0304576	0.003	2.57551e-16	0.7359	23506	5604	0.00284664	67.0983
7	rs12753958	IPF	M00053.metal.pos.txt.gz	G	T	G	T	-0.1753	-0.0002	0.8151	0.8335	0.0349894	0.0018	5.44049e-07	0.8933	24589	7372	0.00101978	25.099
8	rs2076295	IPF	M00053.metal.pos.txt.gz	G	T	G	T	0.3966	0.0003	0.4145	0.4488	0.0270852	0.0011	1.49989e-48	0.8098	24589	7372	0.00864432	214.391
9	rs2197025	IPF	M00053.metal.pos.txt.gz	G	A	G	A	-0.144	-0.0006	0.4483	0.4881	0.0276121	0.0016	1.83716e-07	0.6813	24589	7372	0.00110485	27.1951
10	rs2609259	IPF	M00053.metal.pos.txt.gz	C	A	C	A	-0.2642	0.0011	0.7654	0.7813	0.0316169	0.0017	6.4725e-17	0.5191	24589	7372	0.00283174	69.8218
11	rs2967465	IPF	M00053.metal.pos.txt.gz	G	A	G	A	-0.2037	-0.0013	0.1113	0.1244	0.0407858	0.002	5.90247e-07	0.5154	24589	7372	0.0010134	24.9418
12	rs3808803	IPF	M00053.metal.pos.txt.gz	C	T	C	T	-0.1278	0.0032	0.5358	0.5496	0.0272959	0.0011	2.8407e-06	0.004431	24589	7372	0.000890712	21.9195
13	rs4233306	IPF	M00053.metal.pos.txt.gz	C	T	C	T	0.2068	0.0006	0.7913	0.8024	0.0349894	0.0018	3.41357e-09	0.7534	24589	7372	0.00141864	34.9295
14	rs4642211	IPF	M00053.metal.pos.txt.gz	C	T	C	T	-0.1422	0.0008	0.3539	0.3547	0.0285606	0.0011	6.39523e-07	0.468	24589	7372	0.00100713	24.7873
15	rs6560861	IPF	M00053.metal.pos.txt.gz	G	A	G	A	0.1636	0	0.1928	0.1832	0.0346732	0.0019	2.3778e-06	0.9826	24589	7372	0.000904574	22.2609
16	rs6786378	IPF	M00053.metal.pos.txt.gz	C	A	C	A	-0.1786	0.0017	0.159	0.1457	0.0384673	0.0019	3.43537e-06	0.3812	24589	7372	0.000875909	21.5549
17	rs7100920	IPF	M00053.metal.pos.txt.gz	C	T	C	T	-0.1744	0.0002	0.4612	0.5094	0.0272959	0.0011	1.66726e-10	0.853	24589	7372	0.00165743	40.8189
18	rs7138541	IPF	M00053.metal.pos.txt.gz	G	A	G	A	-0.1298	0.0024	0.3986	0.414	0.0280337	0.0011	3.65408e-06	0.03396	24589	7372	0.000871104	21.4365
19	rs751709	IPF	M00053.metal.pos.txt.gz	G	T	G	T	0.4781	0.0095	0.9761	0.9813	0.100858	0.0092	2.13372e-06	0.2979	24589	1768	0.000913018	22.4689
20	rs757918	IPF	M00053.metal.pos.txt.gz	C	T	C	T	0.1254	-0.001	0.4503	0.4978	0.0272959	0.0011	4.34644e-06	0.3876	24589	7372	0.000857601	21.1039
21	rs9860874	IPF	M00053.metal.pos.txt.gz	C	A	C	A	-0.2572	0	0.7356	0.7463	0.0298253	0.0012	6.49092e-18	0.9671	24589	7372	0.00301523	74.3596
22	rs10967305	IPF	M00054.metal.pos.txt.gz	C	T	C	T	-0.1437	-0.0022	0.4135	0.4079	0.0276121	0.0009	1.94795e-07	0.01405	24589	7355	0.00110026	27.0819
23	rs11073517	IPF	M00054.metal.pos.txt.gz	C	T	C	T	-0.175	-0.0011	0.7296	0.6827	0.0288768	0.0015	1.35927e-09	0.4657	24589	7355	0.00149138	36.7234
24	rs1123573	IPF	M00054.metal.pos.txt.gz	G	A	G	A	-0.1327	-0.0014	0.3867	0.3894	0.0282445	0.0009	2.62378e-06	0.1233	24589	7355	0.000896902	22.0719
25	rs11788059	IPF	M00054.metal.pos.txt.gz	C	T	C	T	0.1547	-0.0009	0.3648	0.3233	0.0283498	0.0015	4.84737e-08	0.5518	24589	7355	0.00120952	29.7745
26	rs1214759	IPF	M00054.metal.pos.txt.gz	G	A	G	A	0.1652	-0.0008	0.6292	0.6671	0.0292984	0.0014	1.71495e-08	0.5995	24589	7355	0.00129131	31.7906
27	rs12610495	IPF	M00054.metal.pos.txt.gz	G	A	G	A	0.2495	0.001	0.2942	0.292	0.0304576	0.002	2.57551e-16	0.6171	23506	5592	0.00284664	67.0983
28	rs12753958	IPF	M00054.metal.pos.txt.gz	G	T	G	T	-0.1753	0	0.8151	0.8534	0.0349894	0.0016	5.44049e-07	0.9957	24589	7355	0.00101978	25.099
29	rs2076295	IPF	M00054.metal.pos.txt.gz	G	T	G	T	0.3966	-0.0006	0.4145	0.4451	0.0270852	0.0009	1.49989e-48	0.5023	24589	7355	0.00864432	214.391
30	rs2197025	IPF	M00054.metal.pos.txt.gz	G	A	G	A	-0.144	-0.0002	0.4483	0.4879	0.0276121	0.0015	1.83716e-07	0.8868	24589	7355	0.00110485	27.1951
31	rs2609259	IPF	M00054.metal.pos.txt.gz	C	A	C	A	-0.2642	-0.0014	0.7654	0.7824	0.0316169	0.0015	6.4725e-17	0.3762	24589	7355	0.00283174	69.8218
32	rs2967465	IPF	M00054.metal.pos.txt.gz	G	A	G	A	-0.2037	0.0006	0.1113	0.13	0.0407858	0.0017	5.90247e-07	0.7219	24589	7355	0.0010134	24.9418
33	rs3808803	IPF	M00054.metal.pos.txt.gz	C	T	C	T	-0.1278	0.001	0.5358	0.5526	0.0272959	0.0009	2.8407e-06	0.2587	24589	7355	0.000890712	21.9195
34	rs4233306	IPF	M00054.metal.pos.txt.gz	C	T	C	T	0.2068	0.0027	0.7913	0.8017	0.0349894	0.0016	3.41357e-09	0.09187	24589	7355	0.00141864	34.9295
35	rs4642211	IPF	M00054.metal.pos.txt.gz	C	T	C	T	-0.1422	0.0003	0.3539	0.3518	0.0285606	0.0015	6.39523e-07	0.8414	24589	7355	0.00100713	24.7873
36	rs6560861	IPF	M00054.metal.pos.txt.gz	G	A	G	A	0.1636	0	0.1928	0.1831	0.0346732	0.0016	2.3778e-06	0.9897	24589	7355	0.000904574	22.2609
37	rs6786378	IPF	M00054.metal.pos.txt.gz	C	A	C	A	-0.1786	-0.0002	0.159	0.1468	0.0384673	0.0016	3.43537e-06	0.8919	24589	7355	0.000875909	21.5549
38	rs7100920	IPF	M00054.metal.pos.txt.gz	C	T	C	T	-0.1744	0.0008	0.4612	0.5061	0.0272959	0.0009	1.66726e-10	0.3951	24589	7355	0.00165743	40.8189
39	rs7138541	IPF	M00054.metal.pos.txt.gz	G	A	G	A	-0.1298	0.0008	0.3986	0.4022	0.0280337	0.0009	3.65408e-06	0.3786	24589	7355	0.000871104	21.4365
40	rs751709	IPF	M00054.metal.pos.txt.gz	G	T	G	T	0.4781	-0.0001	0.9761	0.9813	0.100858	0.0107	2.13372e-06	0.9927	24589	1763	0.000913018	22.4689
41	rs757918	IPF	M00054.metal.pos.txt.gz	C	T	C	T	0.1254	-0.0003	0.4503	0.4999	0.0272959	0.0009	4.34644e-06	0.7196	24589	7355	0.000857601	21.1039
42	rs9860874	IPF	M00054.metal.pos.txt.gz	C	A	C	A	-0.2572	-0.0007	0.7356	0.7458	0.0298253	0.0015	6.49092e-18	0.6607	24589	7355	0.00301523	74.3596
43	rs10967305	IPF	M00059.metal.pos.txt.gz	C	T	C	T	-0.1437	-0.0002	0.4135	0.4087	0.0276121	0.0012	1.94795e-07	0.8893	24589	7355	0.00110026	27.0819
44	rs11073517	IPF	M00059.metal.pos.txt.gz	C	T	C	T	-0.175	0.0023	0.7296	0.6783	0.0288768	0.0012	1.35927e-09	0.05574	24589	7355	0.00149138	36.7234
45	rs1123573	IPF	M00059.metal.pos.txt.gz	G	A	G	A	-0.1327	0.0004	0.3867	0.3917	0.0282445	0.0012	2.62378e-06	0.7272	24589	7355	0.000896902	22.0719
46	rs11788059	IPF	M00059.metal.pos.txt.gz	C	T	C	T	0.1547	-0.0004	0.3648	0.3245	0.0283498	0.0012	4.84737e-08	0.7656	24589	7355	0.00120952	29.7745
47	rs1214759	IPF	M00059.metal.pos.txt.gz	G	A	G	A	0.1652	-0.0006	0.6292	0.6701	0.0292984	0.0012	1.71495e-08	0.6221	24589	7355	0.00129131	31.7906
48	rs12610495	IPF	M00059.metal.pos.txt.gz	G	A	G	A	0.2495	-0.003	0.2942	0.292	0.0304576	0.003	2.57551e-16	0.3117	23506	5593	0.00284664	67.0983
49	rs12753958	IPF	M00059.metal.pos.txt.gz	G	T	G	T	-0.1753	-0.0035	0.8151	0.8372	0.0349894	0.0019	5.44049e-07	0.06473	24589	7355	0.00101978	25.099
50	rs2076295	IPF	M00059.metal.pos.txt.gz	G	T	G	T	0.3966	0.0002	0.4145	0.4478	0.0270852	0.0012	1.49989e-48	0.8754	24589	7355	0.00864432	214.391
51	rs2197025	IPF	M00059.metal.pos.txt.gz	G	A	G	A	-0.144	-0.0013	0.4483	0.4879	0.0276121	0.0012	1.83716e-07	0.2936	24589	7355	0.00110485	27.1951
52	rs2609259	IPF	M00059.metal.pos.txt.gz	C	A	C	A	-0.2642	-0.0004	0.7654	0.7827	0.0316169	0.0012	6.4725e-17	0.7618	24589	7355	0.00283174	69.8218
53	rs2967465	IPF	M00059.metal.pos.txt.gz	G	A	G	A	-0.2037	0.0002	0.1113	0.1256	0.0407858	0.0021	5.90247e-07	0.9267	24589	7355	0.0010134	24.9418
54	rs3808803	IPF	M00059.metal.pos.txt.gz	C	T	C	T	-0.1278	0.0022	0.5358	0.5504	0.0272959	0.0012	2.8407e-06	0.06595	24589	7355	0.000890712	21.9195
55	rs4233306	IPF	M00059.metal.pos.txt.gz	C	T	C	T	0.2068	0.0009	0.7913	0.8015	0.0349894	0.0013	3.41357e-09	0.4886	24589	7355	0.00141864	34.9295
56	rs4642211	IPF	M00059.metal.pos.txt.gz	C	T	C	T	-0.1422	0.0002	0.3539	0.3568	0.0285606	0.0012	6.39523e-07	0.8405	24589	7355	0.00100713	24.7873
57	rs6560861	IPF	M00059.metal.pos.txt.gz	G	A	G	A	0.1636	-0.0011	0.1928	0.1832	0.0346732	0.002	2.3778e-06	0.5865	24589	7355	0.000904574	22.2609
58	rs6786378	IPF	M00059.metal.pos.txt.gz	C	A	C	A	-0.1786	0.0006	0.159	0.1462	0.0384673	0.002	3.43537e-06	0.7723	24589	7355	0.000875909	21.5549
59	rs7100920	IPF	M00059.metal.pos.txt.gz	C	T	C	T	-0.1744	-0.001	0.4612	0.5089	0.0272959	0.0012	1.66726e-10	0.4055	24589	7355	0.00165743	40.8189
60	rs7138541	IPF	M00059.metal.pos.txt.gz	G	A	G	A	-0.1298	-0.0004	0.3986	0.4112	0.0280337	0.0012	3.65408e-06	0.7149	24589	7355	0.000871104	21.4365
61	rs751709	IPF	M00059.metal.pos.txt.gz	G	T	G	T	0.4781	-0.0048	0.9761	0.9813	0.100858	0.0102	2.13372e-06	0.6399	24589	1762	0.000913018	22.4689
62	rs757918	IPF	M00059.metal.pos.txt.gz	C	T	C	T	0.1254	-0.001	0.4503	0.498	0.0272959	0.0012	4.34644e-06	0.3873	24589	7355	0.000857601	21.1039
63	rs9860874	IPF	M00059.metal.pos.txt.gz	C	A	C	A	-0.2572	-0.001	0.7356	0.7467	0.0298253	0.0012	6.49092e-18	0.3938	24589	7355	0.00301523	74.3596
64	rs10967305	IPF	M00060.metal.pos.txt.gz	C	T	C	T	-0.1437	-0.0006	0.4135	0.4079	0.0276121	0.0009	1.94795e-07	0.4874	24589	7351	0.00110026	27.0819
65	rs11073517	IPF	M00060.metal.pos.txt.gz	C	T	C	T	-0.175	-0.0008	0.7296	0.6826	0.0288768	0.0015	1.35927e-09	0.5882	24589	7351	0.00149138	36.7234
66	rs1123573	IPF	M00060.metal.pos.txt.gz	G	A	G	A	-0.1327	0	0.3867	0.3894	0.0282445	0.0009	2.62378e-06	0.9566	24589	7351	0.000896902	22.0719
67	rs11788059	IPF	M00060.metal.pos.txt.gz	C	T	C	T	0.1547	-0.0015	0.3648	0.323	0.0283498	0.0015	4.84737e-08	0.3055	24589	7351	0.00120952	29.7745
68	rs1214759	IPF	M00060.metal.pos.txt.gz	G	A	G	A	0.1652	0.0016	0.6292	0.6668	0.0292984	0.0014	1.71495e-08	0.2822	24589	7351	0.00129131	31.7906
69	rs12610495	IPF	M00060.metal.pos.txt.gz	G	A	G	A	0.2495	0	0.2942	0.292	0.0304576	0.002	2.57551e-16	1	23506	5589	0.00284664	67.0983
70	rs12753958	IPF	M00060.metal.pos.txt.gz	G	T	G	T	-0.1753	-0.0032	0.8151	0.8533	0.0349894	0.0016	5.44049e-07	0.04502	24589	7351	0.00101978	25.099
71	rs2076295	IPF	M00060.metal.pos.txt.gz	G	T	G	T	0.3966	0.0021	0.4145	0.4451	0.0270852	0.0009	1.49989e-48	0.02342	24589	7351	0.00864432	214.391
72	rs2197025	IPF	M00060.metal.pos.txt.gz	G	A	G	A	-0.144	-0.001	0.4483	0.4878	0.0276121	0.0015	1.83716e-07	0.5125	24589	7351	0.00110485	27.1951
73	rs2609259	IPF	M00060.metal.pos.txt.gz	C	A	C	A	-0.2642	-0.0024	0.7654	0.7825	0.0316169	0.0015	6.4725e-17	0.1105	24589	7351	0.00283174	69.8218
74	rs2967465	IPF	M00060.metal.pos.txt.gz	G	A	G	A	-0.2037	0	0.1113	0.13	0.0407858	0.0017	5.90247e-07	0.9896	24589	7351	0.0010134	24.9418
75	rs3808803	IPF	M00060.metal.pos.txt.gz	C	T	C	T	-0.1278	0.0011	0.5358	0.5525	0.0272959	0.0009	2.8407e-06	0.2164	24589	7351	0.000890712	21.9195
76	rs4233306	IPF	M00060.metal.pos.txt.gz	C	T	C	T	0.2068	0.0004	0.7913	0.8018	0.0349894	0.0016	3.41357e-09	0.7932	24589	7351	0.00141864	34.9295
77	rs4642211	IPF	M00060.metal.pos.txt.gz	C	T	C	T	-0.1422	-0.0005	0.3539	0.3642	0.0285606	0.0009	6.39523e-07	0.5816	24589	7351	0.00100713	24.7873
78	rs6560861	IPF	M00060.metal.pos.txt.gz	G	A	G	A	0.1636	0.0003	0.1928	0.1831	0.0346732	0.0016	2.3778e-06	0.8669	24589	7351	0.000904574	22.2609
79	rs6786378	IPF	M00060.metal.pos.txt.gz	C	A	C	A	-0.1786	0.0004	0.159	0.1469	0.0384673	0.0016	3.43537e-06	0.8203	24589	7351	0.000875909	21.5549
80	rs7100920	IPF	M00060.metal.pos.txt.gz	C	T	C	T	-0.1744	0.0005	0.4612	0.506	0.0272959	0.0009	1.66726e-10	0.6134	24589	7351	0.00165743	40.8189
81	rs7138541	IPF	M00060.metal.pos.txt.gz	G	A	G	A	-0.1298	0.0001	0.3986	0.4022	0.0280337	0.0009	3.65408e-06	0.8931	24589	7351	0.000871104	21.4365
82	rs751709	IPF	M00060.metal.pos.txt.gz	G	T	G	T	0.4781	0.0146	0.9761	0.9814	0.100858	0.0107	2.13372e-06	0.1722	24589	1762	0.000913018	22.4689
83	rs757918	IPF	M00060.metal.pos.txt.gz	C	T	C	T	0.1254	0.0015	0.4503	0.4999	0.0272959	0.0009	4.34644e-06	0.09619	24589	7351	0.000857601	21.1039
84	rs9860874	IPF	M00060.metal.pos.txt.gz	C	A	C	A	-0.2572	-0.0009	0.7356	0.7458	0.0298253	0.0015	6.49092e-18	0.54	24589	7351	0.00301523	74.3596
85	rs10967305	IPF	M00063.metal.pos.txt.gz	C	T	C	T	-0.1437	-0.001	0.4135	0.4085	0.0276121	0.0016	1.94795e-07	0.5546	24589	7365	0.00110026	27.0819
86	rs11073517	IPF	M00063.metal.pos.txt.gz	C	T	C	T	-0.175	0.0017	0.7296	0.6764	0.0288768	0.0017	1.35927e-09	0.318	24589	7365	0.00149138	36.7234
87	rs1123573	IPF	M00063.metal.pos.txt.gz	G	A	G	A	-0.1327	0.0017	0.3867	0.3909	0.0282445	0.0017	2.62378e-06	0.304	24589	7365	0.000896902	22.0719
88	rs11788059	IPF	M00063.metal.pos.txt.gz	C	T	C	T	0.1547	0.0035	0.3648	0.3248	0.0283498	0.0017	4.84737e-08	0.03588	24589	7365	0.00120952	29.7745
89	rs1214759	IPF	M00063.metal.pos.txt.gz	G	A	G	A	0.1652	0.0001	0.6292	0.6716	0.0292984	0.0017	1.71495e-08	0.9305	24589	7365	0.00129131	31.7906
90	rs12610495	IPF	M00063.metal.pos.txt.gz	G	A	G	A	0.2495	-0.007	0.2942	0.292	0.0304576	0.002	2.57551e-16	0.0004653	23506	5602	0.00284664	67.0983
91	rs12753958	IPF	M00063.metal.pos.txt.gz	G	T	G	T	-0.1753	-0.0005	0.8151	0.8521	0.0349894	0.0024	5.44049e-07	0.8302	24589	7365	0.00101978	25.099
92	rs2076295	IPF	M00063.metal.pos.txt.gz	G	T	G	T	0.3966	0.0001	0.4145	0.4469	0.0270852	0.0017	1.49989e-48	0.9565	24589	7365	0.00864432	214.391
93	rs2197025	IPF	M00063.metal.pos.txt.gz	G	A	G	A	-0.144	0.0003	0.4483	0.4882	0.0276121	0.0017	1.83716e-07	0.8648	24589	7365	0.00110485	27.1951
94	rs2609259	IPF	M00063.metal.pos.txt.gz	C	A	C	A	-0.2642	0.0041	0.7654	0.783	0.0316169	0.0017	6.4725e-17	0.01869	24589	7365	0.00283174	69.8218
95	rs2967465	IPF	M00063.metal.pos.txt.gz	G	A	G	A	-0.2037	-0.004	0.1113	0.1296	0.0407858	0.0025	5.90247e-07	0.113	24589	7365	0.0010134	24.9418
96	rs3808803	IPF	M00063.metal.pos.txt.gz	C	T	C	T	-0.1278	-0.0023	0.5358	0.551	0.0272959	0.0016	2.8407e-06	0.1546	24589	7365	0.000890712	21.9195
97	rs4233306	IPF	M00063.metal.pos.txt.gz	C	T	C	T	0.2068	-0.0002	0.7913	0.8014	0.0349894	0.0018	3.41357e-09	0.8911	24589	7365	0.00141864	34.9295
98	rs4642211	IPF	M00063.metal.pos.txt.gz	C	T	C	T	-0.1422	0.0002	0.3539	0.3592	0.0285606	0.0017	6.39523e-07	0.9113	24589	7365	0.00100713	24.7873
99	rs6560861	IPF	M00063.metal.pos.txt.gz	G	A	G	A	0.1636	0.0038	0.1928	0.1831	0.0346732	0.0018	2.3778e-06	0.03465	24589	7365	0.000904574	22.2609
100	rs6786378	IPF	M00063.metal.pos.txt.gz	C	A	C	A	-0.1786	0.0022	0.159	0.1468	0.0384673	0.0024	3.43537e-06	0.3628	24589	7365	0.000875909	21.5549
101	rs7100920	IPF	M00063.metal.pos.txt.gz	C	T	C	T	-0.1744	0.0008	0.4612	0.508	0.0272959	0.0017	1.66726e-10	0.619	24589	7365	0.00165743	40.8189
102	rs7138541	IPF	M00063.metal.pos.txt.gz	G	A	G	A	-0.1298	0.0001	0.3986	0.4085	0.0280337	0.0016	3.65408e-06	0.9581	24589	7365	0.000871104	21.4365
103	rs751709	IPF	M00063.metal.pos.txt.gz	G	T	G	T	0.4781	0.0019	0.9761	0.9813	0.100858	0.0155	2.13372e-06	0.9021	24589	1763	0.000913018	22.4689
104	rs757918	IPF	M00063.metal.pos.txt.gz	C	T	C	T	0.1254	-0.0008	0.4503	0.4991	0.0272959	0.0017	4.34644e-06	0.6234	24589	7365	0.000857601	21.1039
105	rs9860874	IPF	M00063.metal.pos.txt.gz	C	A	C	A	-0.2572	0.0015	0.7356	0.7471	0.0298253	0.0017	6.49092e-18	0.3922	24589	7365	0.00301523	74.3596
106	rs10967305	IPF	M00064.metal.pos.txt.gz	C	T	C	T	-0.1437	-0.0005	0.4135	0.4087	0.0276121	0.0011	1.94795e-07	0.644	24589	7354	0.00110026	27.0819
107	rs11073517	IPF	M00064.metal.pos.txt.gz	C	T	C	T	-0.175	-0.0006	0.7296	0.6792	0.0288768	0.0012	1.35927e-09	0.635	24589	7354	0.00149138	36.7234
108	rs1123573	IPF	M00064.metal.pos.txt.gz	G	A	G	A	-0.1327	0	0.3867	0.3922	0.0282445	0.0012	2.62378e-06	0.9889	24589	7354	0.000896902	22.0719
109	rs11788059	IPF	M00064.metal.pos.txt.gz	C	T	C	T	0.1547	-0.0012	0.3648	0.3241	0.0283498	0.0012	4.84737e-08	0.3136	24589	7354	0.00120952	29.7745
110	rs1214759	IPF	M00064.metal.pos.txt.gz	G	A	G	A	0.1652	0.0012	0.6292	0.6695	0.0292984	0.0012	1.71495e-08	0.3024	24589	7354	0.00129131	31.7906
111	rs12610495	IPF	M00064.metal.pos.txt.gz	G	A	G	A	0.2495	0.001	0.2942	0.292	0.0304576	0.003	2.57551e-16	0.7359	23506	5594	0.00284664	67.0983
112	rs12753958	IPF	M00064.metal.pos.txt.gz	G	T	G	T	-0.1753	-0.0021	0.8151	0.8355	0.0349894	0.0019	5.44049e-07	0.2485	24589	7354	0.00101978	25.099
113	rs2076295	IPF	M00064.metal.pos.txt.gz	G	T	G	T	0.3966	-0.0015	0.4145	0.4483	0.0270852	0.0012	1.49989e-48	0.1889	24589	7354	0.00864432	214.391
114	rs2197025	IPF	M00064.metal.pos.txt.gz	G	A	G	A	-0.144	-0.0002	0.4483	0.4879	0.0276121	0.0012	1.83716e-07	0.8323	24589	7354	0.00110485	27.1951
115	rs2609259	IPF	M00064.metal.pos.txt.gz	C	A	C	A	-0.2642	-0.0026	0.7654	0.7828	0.0316169	0.0012	6.4725e-17	0.03415	24589	7354	0.00283174	69.8218
116	rs2967465	IPF	M00064.metal.pos.txt.gz	G	A	G	A	-0.2037	-0.0013	0.1113	0.125	0.0407858	0.0021	5.90247e-07	0.5214	24589	7354	0.0010134	24.9418
117	rs3808803	IPF	M00064.metal.pos.txt.gz	C	T	C	T	-0.1278	-0.0001	0.5358	0.5499	0.0272959	0.0011	2.8407e-06	0.9183	24589	7354	0.000890712	21.9195
118	rs4233306	IPF	M00064.metal.pos.txt.gz	C	T	C	T	0.2068	0.001	0.7913	0.8015	0.0349894	0.0012	3.41357e-09	0.403	24589	7354	0.00141864	34.9295
119	rs4642211	IPF	M00064.metal.pos.txt.gz	C	T	C	T	-0.1422	0.0003	0.3539	0.3558	0.0285606	0.0012	6.39523e-07	0.8156	24589	7354	0.00100713	24.7873
120	rs6560861	IPF	M00064.metal.pos.txt.gz	G	A	G	A	0.1636	0.0018	0.1928	0.1831	0.0346732	0.0019	2.3778e-06	0.345	24589	7354	0.000904574	22.2609
121	rs6786378	IPF	M00064.metal.pos.txt.gz	C	A	C	A	-0.1786	0.0013	0.159	0.1462	0.0384673	0.002	3.43537e-06	0.5074	24589	7354	0.000875909	21.5549
122	rs7100920	IPF	M00064.metal.pos.txt.gz	C	T	C	T	-0.1744	-0.0006	0.4612	0.509	0.0272959	0.0012	1.66726e-10	0.5895	24589	7354	0.00165743	40.8189
123	rs7138541	IPF	M00064.metal.pos.txt.gz	G	A	G	A	-0.1298	-0.0015	0.3986	0.4128	0.0280337	0.0011	3.65408e-06	0.1793	24589	7354	0.000871104	21.4365
124	rs751709	IPF	M00064.metal.pos.txt.gz	G	T	G	T	0.4781	-0.0031	0.9761	0.9812	0.100858	0.0096	2.13372e-06	0.746	24589	1760	0.000913018	22.4689
125	rs757918	IPF	M00064.metal.pos.txt.gz	C	T	C	T	0.1254	0.0002	0.4503	0.4976	0.0272959	0.0012	4.34644e-06	0.8508	24589	7354	0.000857601	21.1039
126	rs9860874	IPF	M00064.metal.pos.txt.gz	C	A	C	A	-0.2572	-0.0002	0.7356	0.7464	0.0298253	0.0012	6.49092e-18	0.8862	24589	7354	0.00301523	74.3596
127	rs10967305	IPF	M00513.metal.pos.txt.gz	C	T	C	T	-0.1437	-0.0019	0.4135	0.4082	0.0276121	0.0016	1.94795e-07	0.2421	24589	7361	0.00110026	27.0819
128	rs11073517	IPF	M00513.metal.pos.txt.gz	C	T	C	T	-0.175	-0.0028	0.7296	0.6762	0.0288768	0.0017	1.35927e-09	0.1017	24589	7361	0.00149138	36.7234
129	rs1123573	IPF	M00513.metal.pos.txt.gz	G	A	G	A	-0.1327	0.0019	0.3867	0.3907	0.0282445	0.0017	2.62378e-06	0.2451	24589	7361	0.000896902	22.0719
130	rs11788059	IPF	M00513.metal.pos.txt.gz	C	T	C	T	0.1547	0.0001	0.3648	0.3249	0.0283498	0.0017	4.84737e-08	0.9605	24589	7361	0.00120952	29.7745
131	rs1214759	IPF	M00513.metal.pos.txt.gz	G	A	G	A	0.1652	0.0029	0.6292	0.6717	0.0292984	0.0017	1.71495e-08	0.07895	24589	7361	0.00129131	31.7906
132	rs12610495	IPF	M00513.metal.pos.txt.gz	G	A	G	A	0.2495	-0.004	0.2942	0.292	0.0304576	0.002	2.57551e-16	0.0455	23506	5598	0.00284664	67.0983
133	rs12753958	IPF	M00513.metal.pos.txt.gz	G	T	G	T	-0.1753	0.0025	0.8151	0.8527	0.0349894	0.0024	5.44049e-07	0.2833	24589	7361	0.00101978	25.099
134	rs2076295	IPF	M00513.metal.pos.txt.gz	G	T	G	T	0.3966	-0.003	0.4145	0.4469	0.0270852	0.0017	1.49989e-48	0.07764	24589	7361	0.00864432	214.391
135	rs2197025	IPF	M00513.metal.pos.txt.gz	G	A	G	A	-0.144	-0.0001	0.4483	0.4879	0.0276121	0.0017	1.83716e-07	0.9423	24589	7361	0.00110485	27.1951
136	rs2609259	IPF	M00513.metal.pos.txt.gz	C	A	C	A	-0.2642	-0.0017	0.7654	0.783	0.0316169	0.0017	6.4725e-17	0.3242	24589	7361	0.00283174	69.8218
137	rs2967465	IPF	M00513.metal.pos.txt.gz	G	A	G	A	-0.2037	-0.0039	0.1113	0.1327	0.0407858	0.0018	5.90247e-07	0.03485	24589	7361	0.0010134	24.9418
138	rs3808803	IPF	M00513.metal.pos.txt.gz	C	T	C	T	-0.1278	0	0.5358	0.5512	0.0272959	0.0017	2.8407e-06	0.9858	24589	7361	0.000890712	21.9195
139	rs4233306	IPF	M00513.metal.pos.txt.gz	C	T	C	T	0.2068	0.0015	0.7913	0.8015	0.0349894	0.0018	3.41357e-09	0.3832	24589	7361	0.00141864	34.9295
140	rs4642211	IPF	M00513.metal.pos.txt.gz	C	T	C	T	-0.1422	-0.0012	0.3539	0.3594	0.0285606	0.0017	6.39523e-07	0.476	24589	7361	0.00100713	24.7873
141	rs6560861	IPF	M00513.metal.pos.txt.gz	G	A	G	A	0.1636	0.0017	0.1928	0.183	0.0346732	0.0018	2.3778e-06	0.3322	24589	7361	0.000904574	22.2609
142	rs6786378	IPF	M00513.metal.pos.txt.gz	C	A	C	A	-0.1786	0.0005	0.159	0.1473	0.0384673	0.0018	3.43537e-06	0.7631	24589	7361	0.000875909	21.5549
143	rs7100920	IPF	M00513.metal.pos.txt.gz	C	T	C	T	-0.1744	-0.0003	0.4612	0.5077	0.0272959	0.0017	1.66726e-10	0.8611	24589	7361	0.00165743	40.8189
144	rs7138541	IPF	M00513.metal.pos.txt.gz	G	A	G	A	-0.1298	-0.002	0.3986	0.4083	0.0280337	0.0017	3.65408e-06	0.2261	24589	7361	0.000871104	21.4365
145	rs751709	IPF	M00513.metal.pos.txt.gz	G	T	G	T	0.4781	-0.0394	0.9761	0.9813	0.100858	0.0156	2.13372e-06	0.01171	24589	1763	0.000913018	22.4689
146	rs757918	IPF	M00513.metal.pos.txt.gz	C	T	C	T	0.1254	-0.0002	0.4503	0.4988	0.0272959	0.0017	4.34644e-06	0.8956	24589	7361	0.000857601	21.1039
147	rs9860874	IPF	M00513.metal.pos.txt.gz	C	A	C	A	-0.2572	0.0014	0.7356	0.7473	0.0298253	0.0017	6.49092e-18	0.4235	24589	7361	0.00301523	74.3596
148	rs10967305	IPF	M00527.metal.pos.txt.gz	C	T	C	T	-0.1437	0.0049	0.4135	0.4091	0.0276121	0.0022	1.94795e-07	0.02911	24589	7365	0.00110026	27.0819
149	rs11073517	IPF	M00527.metal.pos.txt.gz	C	T	C	T	-0.175	0.0041	0.7296	0.6802	0.0288768	0.0023	1.35927e-09	0.07753	24589	7365	0.00149138	36.7234
150	rs1123573	IPF	M00527.metal.pos.txt.gz	G	A	G	A	-0.1327	0.0002	0.3867	0.3926	0.0282445	0.0023	2.62378e-06	0.9314	24589	7365	0.000896902	22.0719
151	rs11788059	IPF	M00527.metal.pos.txt.gz	C	T	C	T	0.1547	-0.0053	0.3648	0.3239	0.0283498	0.0023	4.84737e-08	0.02318	24589	7365	0.00120952	29.7745
152	rs1214759	IPF	M00527.metal.pos.txt.gz	G	A	G	A	0.1652	-0.0018	0.6292	0.6688	0.0292984	0.0023	1.71495e-08	0.4327	24589	7365	0.00129131	31.7906
153	rs12610495	IPF	M00527.metal.pos.txt.gz	G	A	G	A	0.2495	-0.001	0.2942	0.292	0.0304576	0.003	2.57551e-16	0.7389	23506	5604	0.00284664	67.0983
154	rs12753958	IPF	M00527.metal.pos.txt.gz	G	T	G	T	-0.1753	-0.0032	0.8151	0.8478	0.0349894	0.003	5.44049e-07	0.2772	24589	7365	0.00101978	25.099
155	rs2076295	IPF	M00527.metal.pos.txt.gz	G	T	G	T	0.3966	0.0002	0.4145	0.4488	0.0270852	0.0023	1.49989e-48	0.9212	24589	7365	0.00864432	214.391
156	rs2197025	IPF	M00527.metal.pos.txt.gz	G	A	G	A	-0.144	0.0038	0.4483	0.488	0.0276121	0.0023	1.83716e-07	0.1029	24589	7365	0.00110485	27.1951
157	rs2609259	IPF	M00527.metal.pos.txt.gz	C	A	C	A	-0.2642	-0.0012	0.7654	0.7826	0.0316169	0.0024	6.4725e-17	0.6068	24589	7365	0.00283174	69.8218
158	rs2967465	IPF	M00527.metal.pos.txt.gz	G	A	G	A	-0.2037	0.0001	0.1113	0.1285	0.0407858	0.0032	5.90247e-07	0.9864	24589	7365	0.0010134	24.9418
159	rs3808803	IPF	M00527.metal.pos.txt.gz	C	T	C	T	-0.1278	-0.0007	0.5358	0.5498	0.0272959	0.0023	2.8407e-06	0.7416	24589	7365	0.000890712	21.9195
160	rs4233306	IPF	M00527.metal.pos.txt.gz	C	T	C	T	0.2068	-0.0018	0.7913	0.8014	0.0349894	0.0025	3.41357e-09	0.4621	24589	7365	0.00141864	34.9295
161	rs4642211	IPF	M00527.metal.pos.txt.gz	C	T	C	T	-0.1422	-0.0022	0.3539	0.3545	0.0285606	0.0023	6.39523e-07	0.3517	24589	7365	0.00100713	24.7873
162	rs6560861	IPF	M00527.metal.pos.txt.gz	G	A	G	A	0.1636	0.0057	0.1928	0.1832	0.0346732	0.0025	2.3778e-06	0.0245	24589	7365	0.000904574	22.2609
163	rs6786378	IPF	M00527.metal.pos.txt.gz	C	A	C	A	-0.1786	-0.0027	0.159	0.1467	0.0384673	0.0031	3.43537e-06	0.3883	24589	7365	0.000875909	21.5549
164	rs7100920	IPF	M00527.metal.pos.txt.gz	C	T	C	T	-0.1744	-0.0004	0.4612	0.5097	0.0272959	0.0023	1.66726e-10	0.8576	24589	7365	0.00165743	40.8189
165	rs7138541	IPF	M00527.metal.pos.txt.gz	G	A	G	A	-0.1298	-0.0005	0.3986	0.4142	0.0280337	0.0023	3.65408e-06	0.8101	24589	7365	0.000871104	21.4365
166	rs751709	IPF	M00527.metal.pos.txt.gz	G	T	G	T	0.4781	-0.031	0.9761	0.9813	0.100858	0.0183	2.13372e-06	0.0903	24589	1761	0.000913018	22.4689
167	rs757918	IPF	M00527.metal.pos.txt.gz	C	T	C	T	0.1254	-0.0024	0.4503	0.4977	0.0272959	0.0023	4.34644e-06	0.2837	24589	7365	0.000857601	21.1039
168	rs9860874	IPF	M00527.metal.pos.txt.gz	C	A	C	A	-0.2572	-0.0002	0.7356	0.7462	0.0298253	0.0024	6.49092e-18	0.9302	24589	7365	0.00301523	74.3596
169	rs10967305	IPF	M00542.metal.pos.txt.gz	C	T	C	T	-0.1437	0.0086	0.4135	0.4084	0.0276121	0.0066	1.94795e-07	0.1905	24589	7371	0.00110026	27.0819
170	rs11073517	IPF	M00542.metal.pos.txt.gz	C	T	C	T	-0.175	-0.0074	0.7296	0.6778	0.0288768	0.0074	1.35927e-09	0.316	24589	7371	0.00149138	36.7234
171	rs1123573	IPF	M00542.metal.pos.txt.gz	G	A	G	A	-0.1327	0.0044	0.3867	0.3908	0.0282445	0.0067	2.62378e-06	0.5081	24589	7371	0.000896902	22.0719
172	rs11788059	IPF	M00542.metal.pos.txt.gz	C	T	C	T	0.1547	-0.0054	0.3648	0.3243	0.0283498	0.0073	4.84737e-08	0.4648	24589	7371	0.00120952	29.7745
173	rs1214759	IPF	M00542.metal.pos.txt.gz	G	A	G	A	0.1652	0.0047	0.6292	0.6706	0.0292984	0.0073	1.71495e-08	0.5192	24589	7371	0.00129131	31.7906
174	rs12610495	IPF	M00542.metal.pos.txt.gz	G	A	G	A	0.2495	0.014	0.2942	0.292	0.0304576	0.011	2.57551e-16	0.2031	23506	5605	0.00284664	67.0983
175	rs12753958	IPF	M00542.metal.pos.txt.gz	G	T	G	T	-0.1753	0.0076	0.8151	0.8474	0.0349894	0.0104	5.44049e-07	0.4634	24589	7371	0.00101978	25.099
176	rs2076295	IPF	M00542.metal.pos.txt.gz	G	T	G	T	0.3966	-0.0121	0.4145	0.4468	0.0270852	0.0067	1.49989e-48	0.07356	24589	7371	0.00864432	214.391
177	rs2197025	IPF	M00542.metal.pos.txt.gz	G	A	G	A	-0.144	-0.0019	0.4483	0.4881	0.0276121	0.0079	1.83716e-07	0.8089	24589	7371	0.00110485	27.1951
178	rs2609259	IPF	M00542.metal.pos.txt.gz	C	A	C	A	-0.2642	0.0044	0.7654	0.7828	0.0316169	0.0082	6.4725e-17	0.5888	24589	7371	0.00283174	69.8218
179	rs2967465	IPF	M00542.metal.pos.txt.gz	G	A	G	A	-0.2037	0.0139	0.1113	0.1298	0.0407858	0.0101	5.90247e-07	0.1704	24589	7371	0.0010134	24.9418
180	rs3808803	IPF	M00542.metal.pos.txt.gz	C	T	C	T	-0.1278	-0.0065	0.5358	0.5511	0.0272959	0.0066	2.8407e-06	0.3279	24589	7371	0.000890712	21.9195
181	rs4233306	IPF	M00542.metal.pos.txt.gz	C	T	C	T	0.2068	0.0032	0.7913	0.8018	0.0349894	0.0083	3.41357e-09	0.6993	24589	7371	0.00141864	34.9295
182	rs4642211	IPF	M00542.metal.pos.txt.gz	C	T	C	T	-0.1422	-0.008	0.3539	0.3574	0.0285606	0.0073	6.39523e-07	0.2704	24589	7371	0.00100713	24.7873
183	rs6560861	IPF	M00542.metal.pos.txt.gz	G	A	G	A	0.1636	-0.002	0.1928	0.1832	0.0346732	0.0091	2.3778e-06	0.8271	24589	7371	0.000904574	22.2609
184	rs6786378	IPF	M00542.metal.pos.txt.gz	C	A	C	A	-0.1786	0.0004	0.159	0.1468	0.0384673	0.0098	3.43537e-06	0.9666	24589	7371	0.000875909	21.5549
185	rs7100920	IPF	M00542.metal.pos.txt.gz	C	T	C	T	-0.1744	0.0054	0.4612	0.5076	0.0272959	0.0067	1.66726e-10	0.4176	24589	7371	0.00165743	40.8189
186	rs7138541	IPF	M00542.metal.pos.txt.gz	G	A	G	A	-0.1298	0.0024	0.3986	0.4106	0.0280337	0.0072	3.65408e-06	0.7343	24589	7371	0.000871104	21.4365
187	rs751709	IPF	M00542.metal.pos.txt.gz	G	T	G	T	0.4781	0.0305	0.9761	0.9815	0.100858	0.0639	2.13372e-06	0.6331	24589	1766	0.000913018	22.4689
188	rs757918	IPF	M00542.metal.pos.txt.gz	C	T	C	T	0.1254	0.0007	0.4503	0.4992	0.0272959	0.0067	4.34644e-06	0.9159	24589	7371	0.000857601	21.1039
189	rs9860874	IPF	M00542.metal.pos.txt.gz	C	A	C	A	-0.2572	0.003	0.7356	0.7464	0.0298253	0.008	6.49092e-18	0.7077	24589	7371	0.00301523	74.3596
190	rs10967305	IPF	M00553.metal.pos.txt.gz	C	T	C	T	-0.1437	-0.0061	0.4135	0.408	0.0276121	0.0163	1.94795e-07	0.7087	24589	1233	0.00110026	27.0819
191	rs11073517	IPF	M00553.metal.pos.txt.gz	C	T	C	T	-0.175	-0.0003	0.7296	0.6739	0.0288768	0.0176	1.35927e-09	0.9885	24589	1233	0.00149138	36.7234
192	rs1123573	IPF	M00553.metal.pos.txt.gz	G	A	G	A	-0.1327	-0.0271	0.3867	0.3947	0.0282445	0.0168	2.62378e-06	0.1062	24589	1233	0.000896902	22.0719
193	rs11788059	IPF	M00553.metal.pos.txt.gz	C	T	C	T	0.1547	0.0299	0.3648	0.3203	0.0283498	0.0177	4.84737e-08	0.09101	24589	1233	0.00120952	29.7745
194	rs1214759	IPF	M00553.metal.pos.txt.gz	G	A	G	A	0.1652	-0.0018	0.6292	0.6695	0.0292984	0.0178	1.71495e-08	0.9185	24589	1233	0.00129131	31.7906
195	rs12610495	IPF	M00553.metal.pos.txt.gz	G	A	G	A	0.2495	0.046	0.2942	0.292	0.0304576	0.026	2.57551e-16	0.07708	23506	950	0.00284664	67.0983
196	rs12753958	IPF	M00553.metal.pos.txt.gz	G	T	G	T	-0.1753	0.0239	0.8151	0.8458	0.0349894	0.0246	5.44049e-07	0.3324	24589	1233	0.00101978	25.099
197	rs2076295	IPF	M00553.metal.pos.txt.gz	G	T	G	T	0.3966	-0.0112	0.4145	0.4493	0.0270852	0.0169	1.49989e-48	0.5055	24589	1233	0.00864432	214.391
198	rs2197025	IPF	M00553.metal.pos.txt.gz	G	A	G	A	-0.144	-0.0435	0.4483	0.4843	0.0276121	0.0187	1.83716e-07	0.01985	24589	1233	0.00110485	27.1951
199	rs2609259	IPF	M00553.metal.pos.txt.gz	C	A	C	A	-0.2642	-0.0155	0.7654	0.7845	0.0316169	0.0196	6.4725e-17	0.4303	24589	1233	0.00283174	69.8218
200	rs2967465	IPF	M00553.metal.pos.txt.gz	G	A	G	A	-0.2037	-0.0068	0.1113	0.1281	0.0407858	0.0259	5.90247e-07	0.7933	24589	1233	0.0010134	24.9418
201	rs3808803	IPF	M00553.metal.pos.txt.gz	C	T	C	T	-0.1278	0.0312	0.5358	0.5488	0.0272959	0.0165	2.8407e-06	0.05936	24589	1233	0.000890712	21.9195
202	rs4233306	IPF	M00553.metal.pos.txt.gz	C	T	C	T	0.2068	-0.022	0.7913	0.8049	0.0349894	0.0219	3.41357e-09	0.3137	24589	1233	0.00141864	34.9295
203	rs4642211	IPF	M00553.metal.pos.txt.gz	C	T	C	T	-0.1422	0.001	0.3539	0.3662	0.0285606	0.0165	6.39523e-07	0.9497	24589	1233	0.00100713	24.7873
204	rs6560861	IPF	M00553.metal.pos.txt.gz	G	A	G	A	0.1636	-0.028	0.1928	0.1786	0.0346732	0.0216	2.3778e-06	0.1948	24589	1233	0.000904574	22.2609
205	rs6786378	IPF	M00553.metal.pos.txt.gz	C	A	C	A	-0.1786	-0.0034	0.159	0.1408	0.0384673	0.0249	3.43537e-06	0.8907	24589	1233	0.000875909	21.5549
206	rs7100920	IPF	M00553.metal.pos.txt.gz	C	T	C	T	-0.1744	0.0075	0.4612	0.5157	0.0272959	0.0173	1.66726e-10	0.6654	24589	1233	0.00165743	40.8189
207	rs7138541	IPF	M00553.metal.pos.txt.gz	G	A	G	A	-0.1298	0.0247	0.3986	0.4054	0.0280337	0.0165	3.65408e-06	0.1353	24589	1233	0.000871104	21.4365
208	rs751709	IPF	M00553.metal.pos.txt.gz	G	T	G	T	0.4781	0.0332	0.9761	0.9808	0.100858	0.1557	2.13372e-06	0.8309	24589	283	0.000913018	22.4689
209	rs757918	IPF	M00553.metal.pos.txt.gz	C	T	C	T	0.1254	-0.0088	0.4503	0.4939	0.0272959	0.0175	4.34644e-06	0.6149	24589	1233	0.000857601	21.1039
210	rs9860874	IPF	M00553.metal.pos.txt.gz	C	A	C	A	-0.2572	-0.0254	0.7356	0.7452	0.0298253	0.019	6.49092e-18	0.1817	24589	1233	0.00301523	74.3596
211	rs10967305	IPF	M00569.metal.pos.txt.gz	C	T	C	T	-0.1437	0.0075	0.4135	0.4083	0.0276121	0.0084	1.94795e-07	0.3738	24589	7274	0.00110026	27.0819
212	rs11073517	IPF	M00569.metal.pos.txt.gz	C	T	C	T	-0.175	0.0047	0.7296	0.6759	0.0288768	0.0087	1.35927e-09	0.5849	24589	7274	0.00149138	36.7234
213	rs1123573	IPF	M00569.metal.pos.txt.gz	G	A	G	A	-0.1327	-0.0001	0.3867	0.3908	0.0282445	0.0085	2.62378e-06	0.9944	24589	7274	0.000896902	22.0719
214	rs11788059	IPF	M00569.metal.pos.txt.gz	C	T	C	T	0.1547	0.0036	0.3648	0.3251	0.0283498	0.0086	4.84737e-08	0.6774	24589	7274	0.00120952	29.7745
215	rs1214759	IPF	M00569.metal.pos.txt.gz	G	A	G	A	0.1652	-0.011	0.6292	0.6711	0.0292984	0.0092	1.71495e-08	0.231	24589	7274	0.00129131	31.7906
216	rs12610495	IPF	M00569.metal.pos.txt.gz	G	A	G	A	0.2495	-0.022	0.2942	0.292	0.0304576	0.0133	2.57551e-16	0.09686	23506	5561	0.00284664	67.0983
217	rs12753958	IPF	M00569.metal.pos.txt.gz	G	T	G	T	-0.1753	0.0017	0.8151	0.8509	0.0349894	0.0126	5.44049e-07	0.8929	24589	7274	0.00101978	25.099
218	rs2076295	IPF	M00569.metal.pos.txt.gz	G	T	G	T	0.3966	-0.0136	0.4145	0.4458	0.0270852	0.0086	1.49989e-48	0.1157	24589	7274	0.00864432	214.391
219	rs2197025	IPF	M00569.metal.pos.txt.gz	G	A	G	A	-0.144	0.0051	0.4483	0.4886	0.0276121	0.0098	1.83716e-07	0.6023	24589	7274	0.00110485	27.1951
220	rs2609259	IPF	M00569.metal.pos.txt.gz	C	A	C	A	-0.2642	0.0071	0.7654	0.7831	0.0316169	0.0101	6.4725e-17	0.4826	24589	7274	0.00283174	69.8218
221	rs2967465	IPF	M00569.metal.pos.txt.gz	G	A	G	A	-0.2037	0.0047	0.1113	0.1303	0.0407858	0.0123	5.90247e-07	0.7054	24589	7274	0.0010134	24.9418
222	rs3808803	IPF	M00569.metal.pos.txt.gz	C	T	C	T	-0.1278	0.0023	0.5358	0.5513	0.0272959	0.0085	2.8407e-06	0.7858	24589	7274	0.000890712	21.9195
223	rs4233306	IPF	M00569.metal.pos.txt.gz	C	T	C	T	0.2068	-0.0136	0.7913	0.8019	0.0349894	0.0104	3.41357e-09	0.1888	24589	7274	0.00141864	34.9295
224	rs4642211	IPF	M00569.metal.pos.txt.gz	C	T	C	T	-0.1422	-0.0003	0.3539	0.3603	0.0285606	0.0086	6.39523e-07	0.9726	24589	7274	0.00100713	24.7873
225	rs6560861	IPF	M00569.metal.pos.txt.gz	G	A	G	A	0.1636	0.0114	0.1928	0.1832	0.0346732	0.0112	2.3778e-06	0.312	24589	7274	0.000904574	22.2609
226	rs6786378	IPF	M00569.metal.pos.txt.gz	C	A	C	A	-0.1786	-0.0036	0.159	0.1474	0.0384673	0.0119	3.43537e-06	0.7642	24589	7274	0.000875909	21.5549
227	rs7100920	IPF	M00569.metal.pos.txt.gz	C	T	C	T	-0.1744	-0.0086	0.4612	0.5084	0.0272959	0.0085	1.66726e-10	0.3153	24589	7274	0.00165743	40.8189
228	rs7138541	IPF	M00569.metal.pos.txt.gz	G	A	G	A	-0.1298	0.0144	0.3986	0.4074	0.0280337	0.0085	3.65408e-06	0.08972	24589	7274	0.000871104	21.4365
229	rs751709	IPF	M00569.metal.pos.txt.gz	G	T	G	T	0.4781	-0.1107	0.9761	0.9816	0.100858	0.0824	2.13372e-06	0.1793	24589	1713	0.000913018	22.4689
230	rs757918	IPF	M00569.metal.pos.txt.gz	C	T	C	T	0.1254	0.0056	0.4503	0.4992	0.0272959	0.0085	4.34644e-06	0.5141	24589	7274	0.000857601	21.1039
231	rs9860874	IPF	M00569.metal.pos.txt.gz	C	A	C	A	-0.2572	-0.0057	0.7356	0.7466	0.0298253	0.0094	6.49092e-18	0.542	24589	7274	0.00301523	74.3596
232	rs10967305	IPF	M00575.metal.pos.txt.gz	C	T	C	T	-0.1437	0.0042	0.4135	0.4077	0.0276121	0.0036	1.94795e-07	0.2434	24589	5502	0.00110026	27.0819
233	rs11073517	IPF	M00575.metal.pos.txt.gz	C	T	C	T	-0.175	-0.001	0.7296	0.6719	0.0288768	0.0037	1.35927e-09	0.7939	24589	5502	0.00149138	36.7234
234	rs1123573	IPF	M00575.metal.pos.txt.gz	G	A	G	A	-0.1327	-0.0007	0.3867	0.3915	0.0282445	0.0037	2.62378e-06	0.8587	24589	5502	0.000896902	22.0719
235	rs11788059	IPF	M00575.metal.pos.txt.gz	C	T	C	T	0.1547	0.0002	0.3648	0.3258	0.0283498	0.0037	4.84737e-08	0.9497	24589	5502	0.00120952	29.7745
236	rs1214759	IPF	M00575.metal.pos.txt.gz	G	A	G	A	0.1652	0.0049	0.6292	0.6721	0.0292984	0.0037	1.71495e-08	0.1784	24589	5502	0.00129131	31.7906
237	rs12610495	IPF	M00575.metal.pos.txt.gz	G	A	G	A	0.2495	-0.003	0.2942	0.292	0.0304576	0.0053	2.57551e-16	0.571	23506	4500	0.00284664	67.0983
238	rs12753958	IPF	M00575.metal.pos.txt.gz	G	T	G	T	-0.1753	-0.0025	0.8151	0.8582	0.0349894	0.0052	5.44049e-07	0.6284	24589	5502	0.00101978	25.099
239	rs2076295	IPF	M00575.metal.pos.txt.gz	G	T	G	T	0.3966	-0.0009	0.4145	0.4441	0.0270852	0.0037	1.49989e-48	0.8022	24589	5502	0.00864432	214.391
240	rs2197025	IPF	M00575.metal.pos.txt.gz	G	A	G	A	-0.144	0.0027	0.4483	0.4865	0.0276121	0.0043	1.83716e-07	0.5394	24589	5502	0.00110485	27.1951
241	rs2609259	IPF	M00575.metal.pos.txt.gz	C	A	C	A	-0.2642	-0.0022	0.7654	0.7859	0.0316169	0.0045	6.4725e-17	0.6297	24589	5502	0.00283174	69.8218
242	rs2967465	IPF	M00575.metal.pos.txt.gz	G	A	G	A	-0.2037	-0.0035	0.1113	0.1314	0.0407858	0.0048	5.90247e-07	0.4615	24589	5502	0.0010134	24.9418
243	rs3808803	IPF	M00575.metal.pos.txt.gz	C	T	C	T	-0.1278	0.0039	0.5358	0.5516	0.0272959	0.0036	2.8407e-06	0.2831	24589	5502	0.000890712	21.9195
244	rs4233306	IPF	M00575.metal.pos.txt.gz	C	T	C	T	0.2068	0.0025	0.7913	0.8006	0.0349894	0.0046	3.41357e-09	0.5904	24589	5502	0.00141864	34.9295
245	rs4642211	IPF	M00575.metal.pos.txt.gz	C	T	C	T	-0.1422	0.0005	0.3539	0.3609	0.0285606	0.0037	6.39523e-07	0.897	24589	5502	0.00100713	24.7873
246	rs6560861	IPF	M00575.metal.pos.txt.gz	G	A	G	A	0.1636	0.0069	0.1928	0.1829	0.0346732	0.0046	2.3778e-06	0.135	24589	5502	0.000904574	22.2609
247	rs6786378	IPF	M00575.metal.pos.txt.gz	C	A	C	A	-0.1786	0.0056	0.159	0.1477	0.0384673	0.0054	3.43537e-06	0.2992	24589	5502	0.000875909	21.5549
248	rs7100920	IPF	M00575.metal.pos.txt.gz	C	T	C	T	-0.1744	0.0032	0.4612	0.5035	0.0272959	0.0037	1.66726e-10	0.3896	24589	5502	0.00165743	40.8189
249	rs7138541	IPF	M00575.metal.pos.txt.gz	G	A	G	A	-0.1298	-0.0011	0.3986	0.4026	0.0280337	0.0036	3.65408e-06	0.757	24589	5502	0.000871104	21.4365
250	rs751709	IPF	M00575.metal.pos.txt.gz	G	T	G	T	0.4781	-0.007	0.9761	0.9816	0.100858	0.0381	2.13372e-06	0.8539	24589	1002	0.000913018	22.4689
251	rs757918	IPF	M00575.metal.pos.txt.gz	C	T	C	T	0.1254	-0.0027	0.4503	0.5007	0.0272959	0.0037	4.34644e-06	0.4564	24589	5502	0.000857601	21.1039
252	rs9860874	IPF	M00575.metal.pos.txt.gz	C	A	C	A	-0.2572	-0.0016	0.7356	0.7453	0.0298253	0.0037	6.49092e-18	0.6638	24589	5502	0.00301523	74.3596
253	rs10967305	IPF	M00577.metal.pos.txt.gz	C	T	C	T	-0.1437	-0.005	0.4135	0.4079	0.0276121	0.0037	1.94795e-07	0.1785	24589	7333	0.00110026	27.0819
254	rs11073517	IPF	M00577.metal.pos.txt.gz	C	T	C	T	-0.175	0.0021	0.7296	0.6732	0.0288768	0.0038	1.35927e-09	0.572	24589	7333	0.00149138	36.7234
255	rs1123573	IPF	M00577.metal.pos.txt.gz	G	A	G	A	-0.1327	-0.0021	0.3867	0.3896	0.0282445	0.0037	2.62378e-06	0.5743	24589	7333	0.000896902	22.0719
256	rs11788059	IPF	M00577.metal.pos.txt.gz	C	T	C	T	0.1547	-0.0002	0.3648	0.3257	0.0283498	0.0038	4.84737e-08	0.9681	24589	7333	0.00120952	29.7745
257	rs1214759	IPF	M00577.metal.pos.txt.gz	G	A	G	A	0.1652	-0.0006	0.6292	0.6741	0.0292984	0.0038	1.71495e-08	0.8722	24589	7333	0.00129131	31.7906
258	rs12610495	IPF	M00577.metal.pos.txt.gz	G	A	G	A	0.2495	-0.009	0.2942	0.292	0.0304576	0.0053	2.57551e-16	0.08918	23506	5575	0.00284664	67.0983
259	rs12753958	IPF	M00577.metal.pos.txt.gz	G	T	G	T	-0.1753	0.0066	0.8151	0.8552	0.0349894	0.006	5.44049e-07	0.2698	24589	7333	0.00101978	25.099
260	rs2076295	IPF	M00577.metal.pos.txt.gz	G	T	G	T	0.3966	0.0036	0.4145	0.4454	0.0270852	0.0038	1.49989e-48	0.3402	24589	7333	0.00864432	214.391
261	rs2197025	IPF	M00577.metal.pos.txt.gz	G	A	G	A	-0.144	-0.0013	0.4483	0.4882	0.0276121	0.0045	1.83716e-07	0.7653	24589	7333	0.00110485	27.1951
262	rs2609259	IPF	M00577.metal.pos.txt.gz	C	A	C	A	-0.2642	-0.0018	0.7654	0.7833	0.0316169	0.0046	6.4725e-17	0.6916	24589	7333	0.00283174	69.8218
263	rs2967465	IPF	M00577.metal.pos.txt.gz	G	A	G	A	-0.2037	0.0023	0.1113	0.1317	0.0407858	0.0056	5.90247e-07	0.6899	24589	7333	0.0010134	24.9418
264	rs3808803	IPF	M00577.metal.pos.txt.gz	C	T	C	T	-0.1278	-0.0001	0.5358	0.5522	0.0272959	0.0037	2.8407e-06	0.9821	24589	7333	0.000890712	21.9195
265	rs4233306	IPF	M00577.metal.pos.txt.gz	C	T	C	T	0.2068	-0.0079	0.7913	0.8014	0.0349894	0.0047	3.41357e-09	0.092	24589	7333	0.00141864	34.9295
266	rs4642211	IPF	M00577.metal.pos.txt.gz	C	T	C	T	-0.1422	-0.001	0.3539	0.363	0.0285606	0.0038	6.39523e-07	0.79	24589	7333	0.00100713	24.7873
267	rs6560861	IPF	M00577.metal.pos.txt.gz	G	A	G	A	0.1636	0.0029	0.1928	0.1832	0.0346732	0.0048	2.3778e-06	0.5393	24589	7333	0.000904574	22.2609
268	rs6786378	IPF	M00577.metal.pos.txt.gz	C	A	C	A	-0.1786	0.0037	0.159	0.147	0.0384673	0.0055	3.43537e-06	0.5042	24589	7333	0.000875909	21.5549
269	rs7100920	IPF	M00577.metal.pos.txt.gz	C	T	C	T	-0.1744	0.0022	0.4612	0.5062	0.0272959	0.0037	1.66726e-10	0.553	24589	7333	0.00165743	40.8189
270	rs7138541	IPF	M00577.metal.pos.txt.gz	G	A	G	A	-0.1298	0.0023	0.3986	0.4038	0.0280337	0.0037	3.65408e-06	0.5318	24589	7333	0.000871104	21.4365
271	rs751709	IPF	M00577.metal.pos.txt.gz	G	T	G	T	0.4781	0.03	0.9761	0.9813	0.100858	0.0414	2.13372e-06	0.4677	24589	1758	0.000913018	22.4689
272	rs757918	IPF	M00577.metal.pos.txt.gz	C	T	C	T	0.1254	0.0041	0.4503	0.4997	0.0272959	0.0037	4.34644e-06	0.2706	24589	7333	0.000857601	21.1039
273	rs9860874	IPF	M00577.metal.pos.txt.gz	C	A	C	A	-0.2572	-0.0069	0.7356	0.7471	0.0298253	0.0045	6.49092e-18	0.1275	24589	7333	0.00301523	74.3596
274	rs10967305	IPF	M00584.metal.pos.txt.gz	C	T	C	T	-0.1437	-0.0032	0.4135	0.4088	0.0276121	0.0024	1.94795e-07	0.1747	24589	7345	0.00110026	27.0819
275	rs11073517	IPF	M00584.metal.pos.txt.gz	C	T	C	T	-0.175	-0.0042	0.7296	0.6775	0.0288768	0.0025	1.35927e-09	0.08551	24589	7345	0.00149138	36.7234
276	rs1123573	IPF	M00584.metal.pos.txt.gz	G	A	G	A	-0.1327	0.0047	0.3867	0.3913	0.0282445	0.0024	2.62378e-06	0.05019	24589	7345	0.000896902	22.0719
277	rs11788059	IPF	M00584.metal.pos.txt.gz	C	T	C	T	0.1547	0.0009	0.3648	0.3247	0.0283498	0.0024	4.84737e-08	0.7056	24589	7345	0.00120952	29.7745
278	rs1214759	IPF	M00584.metal.pos.txt.gz	G	A	G	A	0.1652	0.0002	0.6292	0.6704	0.0292984	0.0024	1.71495e-08	0.9244	24589	7345	0.00129131	31.7906
279	rs12610495	IPF	M00584.metal.pos.txt.gz	G	A	G	A	0.2495	0.006	0.2942	0.292	0.0304576	0.003	2.57551e-16	0.0455	23506	5591	0.00284664	67.0983
280	rs12753958	IPF	M00584.metal.pos.txt.gz	G	T	G	T	-0.1753	0.0046	0.8151	0.8531	0.0349894	0.0032	5.44049e-07	0.1422	24589	7345	0.00101978	25.099
281	rs2076295	IPF	M00584.metal.pos.txt.gz	G	T	G	T	0.3966	-0.0027	0.4145	0.4476	0.0270852	0.0024	1.49989e-48	0.2655	24589	7345	0.00864432	214.391
282	rs2197025	IPF	M00584.metal.pos.txt.gz	G	A	G	A	-0.144	0.0031	0.4483	0.4882	0.0276121	0.0025	1.83716e-07	0.2078	24589	7345	0.00110485	27.1951
283	rs2609259	IPF	M00584.metal.pos.txt.gz	C	A	C	A	-0.2642	0.0027	0.7654	0.7828	0.0316169	0.0025	6.4725e-17	0.2805	24589	7345	0.00283174	69.8218
284	rs2967465	IPF	M00584.metal.pos.txt.gz	G	A	G	A	-0.2037	0.0005	0.1113	0.1298	0.0407858	0.0034	5.90247e-07	0.8728	24589	7345	0.0010134	24.9418
285	rs3808803	IPF	M00584.metal.pos.txt.gz	C	T	C	T	-0.1278	-0.0008	0.5358	0.5506	0.0272959	0.0024	2.8407e-06	0.7352	24589	7345	0.000890712	21.9195
286	rs4233306	IPF	M00584.metal.pos.txt.gz	C	T	C	T	0.2068	0.0033	0.7913	0.8014	0.0349894	0.0026	3.41357e-09	0.2035	24589	7345	0.00141864	34.9295
287	rs4642211	IPF	M00584.metal.pos.txt.gz	C	T	C	T	-0.1422	-0.002	0.3539	0.3573	0.0285606	0.0024	6.39523e-07	0.4134	24589	7345	0.00100713	24.7873
288	rs6560861	IPF	M00584.metal.pos.txt.gz	G	A	G	A	0.1636	0.0057	0.1928	0.1832	0.0346732	0.0026	2.3778e-06	0.03065	24589	7345	0.000904574	22.2609
289	rs6786378	IPF	M00584.metal.pos.txt.gz	C	A	C	A	-0.1786	-0.0001	0.159	0.1469	0.0384673	0.0033	3.43537e-06	0.9859	24589	7345	0.000875909	21.5549
290	rs7100920	IPF	M00584.metal.pos.txt.gz	C	T	C	T	-0.1744	-0.0024	0.4612	0.5078	0.0272959	0.0024	1.66726e-10	0.3193	24589	7345	0.00165743	40.8189
291	rs7138541	IPF	M00584.metal.pos.txt.gz	G	A	G	A	-0.1298	0.0008	0.3986	0.4104	0.0280337	0.0024	3.65408e-06	0.7426	24589	7345	0.000871104	21.4365
292	rs751709	IPF	M00584.metal.pos.txt.gz	G	T	G	T	0.4781	0.0045	0.9761	0.9812	0.100858	0.0211	2.13372e-06	0.8312	24589	1754	0.000913018	22.4689
293	rs757918	IPF	M00584.metal.pos.txt.gz	C	T	C	T	0.1254	-0.0001	0.4503	0.4991	0.0272959	0.0024	4.34644e-06	0.9637	24589	7345	0.000857601	21.1039
294	rs9860874	IPF	M00584.metal.pos.txt.gz	C	A	C	A	-0.2572	-0.0001	0.7356	0.7466	0.0298253	0.0025	6.49092e-18	0.9829	24589	7345	0.00301523	74.3596
295	rs10967305	IPF	M00599.metal.pos.txt.gz	C	T	C	T	-0.1437	0.0066	0.4135	0.408	0.0276121	0.0035	1.94795e-07	0.0576	24589	7237	0.00110026	27.0819
296	rs11073517	IPF	M00599.metal.pos.txt.gz	C	T	C	T	-0.175	0.0032	0.7296	0.6759	0.0288768	0.0042	1.35927e-09	0.4458	24589	7237	0.00149138	36.7234
297	rs1123573	IPF	M00599.metal.pos.txt.gz	G	A	G	A	-0.1327	-0.0009	0.3867	0.3899	0.0282445	0.0035	2.62378e-06	0.793	24589	7237	0.000896902	22.0719
298	rs11788059	IPF	M00599.metal.pos.txt.gz	C	T	C	T	0.1547	-0.0015	0.3648	0.324	0.0283498	0.0042	4.84737e-08	0.7118	24589	7237	0.00120952	29.7745
299	rs1214759	IPF	M00599.metal.pos.txt.gz	G	A	G	A	0.1652	-0.0035	0.6292	0.6712	0.0292984	0.0041	1.71495e-08	0.403	24589	7237	0.00129131	31.7906
300	rs12610495	IPF	M00599.metal.pos.txt.gz	G	A	G	A	0.2495	-0.007	0.2942	0.292	0.0304576	0.005	2.57551e-16	0.1615	23506	5514	0.00284664	67.0983
301	rs12753958	IPF	M00599.metal.pos.txt.gz	G	T	G	T	-0.1753	-0.0061	0.8151	0.8536	0.0349894	0.0056	5.44049e-07	0.2725	24589	7237	0.00101978	25.099
302	rs2076295	IPF	M00599.metal.pos.txt.gz	G	T	G	T	0.3966	-0.0004	0.4145	0.4457	0.0270852	0.0035	1.49989e-48	0.9016	24589	7237	0.00864432	214.391
303	rs2197025	IPF	M00599.metal.pos.txt.gz	G	A	G	A	-0.144	0.0018	0.4483	0.4888	0.0276121	0.0042	1.83716e-07	0.6617	24589	7237	0.00110485	27.1951
304	rs2609259	IPF	M00599.metal.pos.txt.gz	C	A	C	A	-0.2642	0.0056	0.7654	0.7828	0.0316169	0.0043	6.4725e-17	0.1969	24589	7237	0.00283174	69.8218
305	rs2967465	IPF	M00599.metal.pos.txt.gz	G	A	G	A	-0.2037	-0.0041	0.1113	0.1311	0.0407858	0.0053	5.90247e-07	0.4375	24589	7237	0.0010134	24.9418
306	rs3808803	IPF	M00599.metal.pos.txt.gz	C	T	C	T	-0.1278	0.0016	0.5358	0.5523	0.0272959	0.0035	2.8407e-06	0.6526	24589	7237	0.000890712	21.9195
307	rs4233306	IPF	M00599.metal.pos.txt.gz	C	T	C	T	0.2068	-0.002	0.7913	0.8016	0.0349894	0.0044	3.41357e-09	0.6535	24589	7237	0.00141864	34.9295
308	rs4642211	IPF	M00599.metal.pos.txt.gz	C	T	C	T	-0.1422	-0.0015	0.3539	0.3587	0.0285606	0.0042	6.39523e-07	0.723	24589	7237	0.00100713	24.7873
309	rs6560861	IPF	M00599.metal.pos.txt.gz	G	A	G	A	0.1636	-0.0016	0.1928	0.1831	0.0346732	0.0051	2.3778e-06	0.7621	24589	7237	0.000904574	22.2609
310	rs6786378	IPF	M00599.metal.pos.txt.gz	C	A	C	A	-0.1786	-0.0112	0.159	0.1473	0.0384673	0.0052	3.43537e-06	0.03107	24589	7237	0.000875909	21.5549
311	rs7100920	IPF	M00599.metal.pos.txt.gz	C	T	C	T	-0.1744	-0.0027	0.4612	0.5066	0.0272959	0.0035	1.66726e-10	0.4495	24589	7237	0.00165743	40.8189
312	rs7138541	IPF	M00599.metal.pos.txt.gz	G	A	G	A	-0.1298	0.0002	0.3986	0.4045	0.0280337	0.0035	3.65408e-06	0.9587	24589	7237	0.000871104	21.4365
313	rs751709	IPF	M00599.metal.pos.txt.gz	G	T	G	T	0.4781	-0.0516	0.9761	0.9812	0.100858	0.0378	2.13372e-06	0.1722	24589	1723	0.000913018	22.4689
314	rs757918	IPF	M00599.metal.pos.txt.gz	C	T	C	T	0.1254	0.0055	0.4503	0.4996	0.0272959	0.0035	4.34644e-06	0.1179	24589	7237	0.000857601	21.1039
315	rs9860874	IPF	M00599.metal.pos.txt.gz	C	A	C	A	-0.2572	-0.0001	0.7356	0.7467	0.0298253	0.0043	6.49092e-18	0.9801	24589	7237	0.00301523	74.3596
316	rs10967305	IPF	M00606.metal.pos.txt.gz	C	T	C	T	-0.1437	-0.0016	0.4135	0.4083	0.0276121	0.0017	1.94795e-07	0.3209	24589	7354	0.00110026	27.0819
317	rs11073517	IPF	M00606.metal.pos.txt.gz	C	T	C	T	-0.175	0.0019	0.7296	0.6758	0.0288768	0.0017	1.35927e-09	0.2754	24589	7354	0.00149138	36.7234
318	rs1123573	IPF	M00606.metal.pos.txt.gz	G	A	G	A	-0.1327	-0.0015	0.3867	0.3907	0.0282445	0.0017	2.62378e-06	0.3778	24589	7354	0.000896902	22.0719
319	rs11788059	IPF	M00606.metal.pos.txt.gz	C	T	C	T	0.1547	-0.0031	0.3648	0.325	0.0283498	0.0017	4.84737e-08	0.07231	24589	7354	0.00120952	29.7745
320	rs1214759	IPF	M00606.metal.pos.txt.gz	G	A	G	A	0.1652	0	0.6292	0.6721	0.0292984	0.0017	1.71495e-08	0.9902	24589	7354	0.00129131	31.7906
321	rs12610495	IPF	M00606.metal.pos.txt.gz	G	A	G	A	0.2495	0	0.2942	0.292	0.0304576	0.002	2.57551e-16	1	23506	5588	0.00284664	67.0983
322	rs12753958	IPF	M00606.metal.pos.txt.gz	G	T	G	T	-0.1753	-0.0027	0.8151	0.8536	0.0349894	0.0024	5.44049e-07	0.2607	24589	7354	0.00101978	25.099
323	rs2076295	IPF	M00606.metal.pos.txt.gz	G	T	G	T	0.3966	-0.0014	0.4145	0.4468	0.0270852	0.0017	1.49989e-48	0.4032	24589	7354	0.00864432	214.391
324	rs2197025	IPF	M00606.metal.pos.txt.gz	G	A	G	A	-0.144	0.0005	0.4483	0.4881	0.0276121	0.0017	1.83716e-07	0.7518	24589	7354	0.00110485	27.1951
325	rs2609259	IPF	M00606.metal.pos.txt.gz	C	A	C	A	-0.2642	0.0022	0.7654	0.783	0.0316169	0.0017	6.4725e-17	0.2085	24589	7354	0.00283174	69.8218
326	rs2967465	IPF	M00606.metal.pos.txt.gz	G	A	G	A	-0.2037	-0.0004	0.1113	0.1329	0.0407858	0.0018	5.90247e-07	0.8453	24589	7354	0.0010134	24.9418
327	rs3808803	IPF	M00606.metal.pos.txt.gz	C	T	C	T	-0.1278	-0.0026	0.5358	0.5512	0.0272959	0.0017	2.8407e-06	0.1176	24589	7354	0.000890712	21.9195
328	rs4233306	IPF	M00606.metal.pos.txt.gz	C	T	C	T	0.2068	0.0017	0.7913	0.8014	0.0349894	0.0018	3.41357e-09	0.3523	24589	7354	0.00141864	34.9295
329	rs4642211	IPF	M00606.metal.pos.txt.gz	C	T	C	T	-0.1422	-0.0011	0.3539	0.3599	0.0285606	0.0017	6.39523e-07	0.5189	24589	7354	0.00100713	24.7873
330	rs6560861	IPF	M00606.metal.pos.txt.gz	G	A	G	A	0.1636	0.0014	0.1928	0.183	0.0346732	0.0018	2.3778e-06	0.4281	24589	7354	0.000904574	22.2609
331	rs6786378	IPF	M00606.metal.pos.txt.gz	C	A	C	A	-0.1786	0	0.159	0.1474	0.0384673	0.0018	3.43537e-06	0.9992	24589	7354	0.000875909	21.5549
332	rs7100920	IPF	M00606.metal.pos.txt.gz	C	T	C	T	-0.1744	0.0001	0.4612	0.5077	0.0272959	0.0017	1.66726e-10	0.9675	24589	7354	0.00165743	40.8189
333	rs7138541	IPF	M00606.metal.pos.txt.gz	G	A	G	A	-0.1298	0.0002	0.3986	0.4076	0.0280337	0.0017	3.65408e-06	0.9102	24589	7354	0.000871104	21.4365
334	rs751709	IPF	M00606.metal.pos.txt.gz	G	T	G	T	0.4781	0.0115	0.9761	0.9813	0.100858	0.0161	2.13372e-06	0.4753	24589	1766	0.000913018	22.4689
335	rs757918	IPF	M00606.metal.pos.txt.gz	C	T	C	T	0.1254	-0.0009	0.4503	0.499	0.0272959	0.0017	4.34644e-06	0.574	24589	7354	0.000857601	21.1039
336	rs9860874	IPF	M00606.metal.pos.txt.gz	C	A	C	A	-0.2572	-0.0006	0.7356	0.7471	0.0298253	0.0017	6.49092e-18	0.7113	24589	7354	0.00301523	74.3596
337	rs10967305	IPF	M01105.metal.pos.txt.gz	C	T	C	T	-0.1437	0.0032	0.4135	0.4082	0.0276121	0.0024	1.94795e-07	0.1803	24589	7333	0.00110026	27.0819
338	rs11073517	IPF	M01105.metal.pos.txt.gz	C	T	C	T	-0.175	-0.0014	0.7296	0.6782	0.0288768	0.0024	1.35927e-09	0.5647	24589	7333	0.00149138	36.7234
339	rs1123573	IPF	M01105.metal.pos.txt.gz	G	A	G	A	-0.1327	0.0015	0.3867	0.3913	0.0282445	0.0024	2.62378e-06	0.5274	24589	7333	0.000896902	22.0719
340	rs11788059	IPF	M01105.metal.pos.txt.gz	C	T	C	T	0.1547	-0.0057	0.3648	0.3244	0.0283498	0.0024	4.84737e-08	0.01887	24589	7333	0.00120952	29.7745
341	rs1214759	IPF	M01105.metal.pos.txt.gz	G	A	G	A	0.1652	-0.001	0.6292	0.6704	0.0292984	0.0024	1.71495e-08	0.687	24589	7333	0.00129131	31.7906
342	rs12610495	IPF	M01105.metal.pos.txt.gz	G	A	G	A	0.2495	0.001	0.2942	0.292	0.0304576	0.004	2.57551e-16	0.8026	23506	5569	0.00284664	67.0983
343	rs12753958	IPF	M01105.metal.pos.txt.gz	G	T	G	T	-0.1753	0.0038	0.8151	0.8441	0.0349894	0.0036	5.44049e-07	0.2894	24589	7333	0.00101978	25.099
344	rs2076295	IPF	M01105.metal.pos.txt.gz	G	T	G	T	0.3966	-0.004	0.4145	0.448	0.0270852	0.0024	1.49989e-48	0.1007	24589	7333	0.00864432	214.391
345	rs2197025	IPF	M01105.metal.pos.txt.gz	G	A	G	A	-0.144	0.0001	0.4483	0.4879	0.0276121	0.0029	1.83716e-07	0.9724	24589	7333	0.00110485	27.1951
346	rs2609259	IPF	M01105.metal.pos.txt.gz	C	A	C	A	-0.2642	0.0045	0.7654	0.7828	0.0316169	0.0025	6.4725e-17	0.07566	24589	7333	0.00283174	69.8218
347	rs2967465	IPF	M01105.metal.pos.txt.gz	G	A	G	A	-0.2037	0.0023	0.1113	0.1298	0.0407858	0.0034	5.90247e-07	0.4896	24589	7333	0.0010134	24.9418
348	rs3808803	IPF	M01105.metal.pos.txt.gz	C	T	C	T	-0.1278	-0.0005	0.5358	0.5503	0.0272959	0.0024	2.8407e-06	0.8317	24589	7333	0.000890712	21.9195
349	rs4233306	IPF	M01105.metal.pos.txt.gz	C	T	C	T	0.2068	-0.0028	0.7913	0.8018	0.0349894	0.0031	3.41357e-09	0.3714	24589	7333	0.00141864	34.9295
350	rs4642211	IPF	M01105.metal.pos.txt.gz	C	T	C	T	-0.1422	-0.0028	0.3539	0.3571	0.0285606	0.0024	6.39523e-07	0.2544	24589	7333	0.00100713	24.7873
351	rs6560861	IPF	M01105.metal.pos.txt.gz	G	A	G	A	0.1636	0.0031	0.1928	0.1832	0.0346732	0.0032	2.3778e-06	0.3394	24589	7333	0.000904574	22.2609
352	rs6786378	IPF	M01105.metal.pos.txt.gz	C	A	C	A	-0.1786	0.0009	0.159	0.1468	0.0384673	0.0032	3.43537e-06	0.7847	24589	7333	0.000875909	21.5549
353	rs7100920	IPF	M01105.metal.pos.txt.gz	C	T	C	T	-0.1744	0	0.4612	0.5088	0.0272959	0.0024	1.66726e-10	0.9951	24589	7333	0.00165743	40.8189
354	rs7138541	IPF	M01105.metal.pos.txt.gz	G	A	G	A	-0.1298	-0.0035	0.3986	0.4111	0.0280337	0.0024	3.65408e-06	0.1436	24589	7333	0.000871104	21.4365
355	rs751709	IPF	M01105.metal.pos.txt.gz	G	T	G	T	0.4781	0.0147	0.9761	0.9815	0.100858	0.0209	2.13372e-06	0.4816	24589	1764	0.000913018	22.4689
356	rs757918	IPF	M01105.metal.pos.txt.gz	C	T	C	T	0.1254	-0.0017	0.4503	0.4982	0.0272959	0.0024	4.34644e-06	0.4865	24589	7333	0.000857601	21.1039
357	rs9860874	IPF	M01105.metal.pos.txt.gz	C	A	C	A	-0.2572	0.002	0.7356	0.7467	0.0298253	0.0025	6.49092e-18	0.4311	24589	7333	0.00301523	74.3596
358	rs10967305	IPF	M01107.metal.pos.txt.gz	C	T	C	T	-0.1437	0.0038	0.4135	0.4088	0.0276121	0.0045	1.94795e-07	0.3902	24589	5344	0.00110026	27.0819
359	rs11073517	IPF	M01107.metal.pos.txt.gz	C	T	C	T	-0.175	0.0046	0.7296	0.6738	0.0288768	0.0046	1.35927e-09	0.3101	24589	5344	0.00149138	36.7234
360	rs1123573	IPF	M01107.metal.pos.txt.gz	G	A	G	A	-0.1327	-0.0069	0.3867	0.3906	0.0282445	0.0045	2.62378e-06	0.124	24589	5344	0.000896902	22.0719
361	rs11788059	IPF	M01107.metal.pos.txt.gz	C	T	C	T	0.1547	-0.0017	0.3648	0.3245	0.0283498	0.0046	4.84737e-08	0.7093	24589	5344	0.00120952	29.7745
362	rs1214759	IPF	M01107.metal.pos.txt.gz	G	A	G	A	0.1652	-0.0024	0.6292	0.6754	0.0292984	0.0045	1.71495e-08	0.59	24589	5344	0.00129131	31.7906
363	rs12610495	IPF	M01107.metal.pos.txt.gz	G	A	G	A	0.2495	-0.004	0.2942	0.292	0.0304576	0.006	2.57551e-16	0.505	23506	4608	0.00284664	67.0983
364	rs12753958	IPF	M01107.metal.pos.txt.gz	G	T	G	T	-0.1753	-0.0035	0.8151	0.8687	0.0349894	0.0063	5.44049e-07	0.5747	24589	5344	0.00101978	25.099
365	rs2076295	IPF	M01107.metal.pos.txt.gz	G	T	G	T	0.3966	0.0021	0.4145	0.4445	0.0270852	0.0045	1.49989e-48	0.6447	24589	5344	0.00864432	214.391
366	rs2197025	IPF	M01107.metal.pos.txt.gz	G	A	G	A	-0.144	-0.0001	0.4483	0.4915	0.0276121	0.0052	1.83716e-07	0.9858	24589	5344	0.00110485	27.1951
367	rs2609259	IPF	M01107.metal.pos.txt.gz	C	A	C	A	-0.2642	-0.0077	0.7654	0.7823	0.0316169	0.0046	6.4725e-17	0.09568	24589	5344	0.00283174	69.8218
368	rs2967465	IPF	M01107.metal.pos.txt.gz	G	A	G	A	-0.2037	0.006	0.1113	0.132	0.0407858	0.0065	5.90247e-07	0.3524	24589	5344	0.0010134	24.9418
369	rs3808803	IPF	M01107.metal.pos.txt.gz	C	T	C	T	-0.1278	-0.0009	0.5358	0.5534	0.0272959	0.0037	2.8407e-06	0.8106	24589	5344	0.000890712	21.9195
370	rs4233306	IPF	M01107.metal.pos.txt.gz	C	T	C	T	0.2068	-0.002	0.7913	0.7998	0.0349894	0.0054	3.41357e-09	0.7119	24589	5344	0.00141864	34.9295
371	rs4642211	IPF	M01107.metal.pos.txt.gz	C	T	C	T	-0.1422	0.0044	0.3539	0.3648	0.0285606	0.0045	6.39523e-07	0.3322	24589	5344	0.00100713	24.7873
372	rs6560861	IPF	M01107.metal.pos.txt.gz	G	A	G	A	0.1636	0.001	0.1928	0.1838	0.0346732	0.0055	2.3778e-06	0.8623	24589	5344	0.000904574	22.2609
373	rs6786378	IPF	M01107.metal.pos.txt.gz	C	A	C	A	-0.1786	0.0059	0.159	0.147	0.0384673	0.0063	3.43537e-06	0.3474	24589	5344	0.000875909	21.5549
374	rs7100920	IPF	M01107.metal.pos.txt.gz	C	T	C	T	-0.1744	-0.0085	0.4612	0.5058	0.0272959	0.0045	1.66726e-10	0.05792	24589	5344	0.00165743	40.8189
375	rs7138541	IPF	M01107.metal.pos.txt.gz	G	A	G	A	-0.1298	-0.0029	0.3986	0.4034	0.0280337	0.0045	3.65408e-06	0.527	24589	5344	0.000871104	21.4365
376	rs751709	IPF	M01107.metal.pos.txt.gz	G	T	G	T	0.4781	-0.0314	0.9761	0.9788	0.100858	0.0496	2.13372e-06	0.5267	24589	736	0.000913018	22.4689
377	rs757918	IPF	M01107.metal.pos.txt.gz	C	T	C	T	0.1254	-0.0054	0.4503	0.4992	0.0272959	0.0045	4.34644e-06	0.2347	24589	5344	0.000857601	21.1039
378	rs9860874	IPF	M01107.metal.pos.txt.gz	C	A	C	A	-0.2572	-0.0027	0.7356	0.7482	0.0298253	0.0046	6.49092e-18	0.5543	24589	5344	0.00301523	74.3596
379	rs10967305	IPF	M01110.metal.pos.txt.gz	C	T	C	T	-0.1437	-0.0009	0.4135	0.4077	0.0276121	0.0018	1.94795e-07	0.6096	24589	7367	0.00110026	27.0819
380	rs11073517	IPF	M01110.metal.pos.txt.gz	C	T	C	T	-0.175	0.0015	0.7296	0.677	0.0288768	0.0025	1.35927e-09	0.5443	24589	7367	0.00149138	36.7234
381	rs1123573	IPF	M01110.metal.pos.txt.gz	G	A	G	A	-0.1327	-0.0025	0.3867	0.3911	0.0282445	0.0025	2.62378e-06	0.3061	24589	7367	0.000896902	22.0719
382	rs11788059	IPF	M01110.metal.pos.txt.gz	C	T	C	T	0.1547	-0.0018	0.3648	0.3246	0.0283498	0.0025	4.84737e-08	0.4706	24589	7367	0.00120952	29.7745
383	rs1214759	IPF	M01110.metal.pos.txt.gz	G	A	G	A	0.1652	-0.0001	0.6292	0.6714	0.0292984	0.0025	1.71495e-08	0.963	24589	7367	0.00129131	31.7906
384	rs12610495	IPF	M01110.metal.pos.txt.gz	G	A	G	A	0.2495	0.002	0.2942	0.292	0.0304576	0.003	2.57551e-16	0.505	23506	5601	0.00284664	67.0983
385	rs12753958	IPF	M01110.metal.pos.txt.gz	G	T	G	T	-0.1753	0.0013	0.8151	0.8549	0.0349894	0.0032	5.44049e-07	0.6858	24589	7367	0.00101978	25.099
386	rs2076295	IPF	M01110.metal.pos.txt.gz	G	T	G	T	0.3966	-0.001	0.4145	0.4473	0.0270852	0.0025	1.49989e-48	0.6748	24589	7367	0.00864432	214.391
387	rs2197025	IPF	M01110.metal.pos.txt.gz	G	A	G	A	-0.144	0.0019	0.4483	0.488	0.0276121	0.0025	1.83716e-07	0.4344	24589	7367	0.00110485	27.1951
388	rs2609259	IPF	M01110.metal.pos.txt.gz	C	A	C	A	-0.2642	-0.0023	0.7654	0.7829	0.0316169	0.0026	6.4725e-17	0.3723	24589	7367	0.00283174	69.8218
389	rs2967465	IPF	M01110.metal.pos.txt.gz	G	A	G	A	-0.2037	0.0042	0.1113	0.1303	0.0407858	0.0034	5.90247e-07	0.2173	24589	7367	0.0010134	24.9418
390	rs3808803	IPF	M01110.metal.pos.txt.gz	C	T	C	T	-0.1278	-0.0013	0.5358	0.5527	0.0272959	0.0018	2.8407e-06	0.4623	24589	7367	0.000890712	21.9195
391	rs4233306	IPF	M01110.metal.pos.txt.gz	C	T	C	T	0.2068	-0.0011	0.7913	0.8015	0.0349894	0.0026	3.41357e-09	0.6726	24589	7367	0.00141864	34.9295
392	rs4642211	IPF	M01110.metal.pos.txt.gz	C	T	C	T	-0.1422	-0.0031	0.3539	0.3585	0.0285606	0.0025	6.39523e-07	0.2172	24589	7367	0.00100713	24.7873
393	rs6560861	IPF	M01110.metal.pos.txt.gz	G	A	G	A	0.1636	0.0004	0.1928	0.1831	0.0346732	0.0027	2.3778e-06	0.8775	24589	7367	0.000904574	22.2609
394	rs6786378	IPF	M01110.metal.pos.txt.gz	C	A	C	A	-0.1786	-0.0035	0.159	0.1468	0.0384673	0.0033	3.43537e-06	0.2882	24589	7367	0.000875909	21.5549
395	rs7100920	IPF	M01110.metal.pos.txt.gz	C	T	C	T	-0.1744	0.0002	0.4612	0.5081	0.0272959	0.0025	1.66726e-10	0.9274	24589	7367	0.00165743	40.8189
396	rs7138541	IPF	M01110.metal.pos.txt.gz	G	A	G	A	-0.1298	-0.0016	0.3986	0.4093	0.0280337	0.0024	3.65408e-06	0.5219	24589	7367	0.000871104	21.4365
397	rs751709	IPF	M01110.metal.pos.txt.gz	G	T	G	T	0.4781	-0.0136	0.9761	0.9813	0.100858	0.0223	2.13372e-06	0.5407	24589	1766	0.000913018	22.4689
398	rs757918	IPF	M01110.metal.pos.txt.gz	C	T	C	T	0.1254	0.0001	0.4503	0.4986	0.0272959	0.0025	4.34644e-06	0.9536	24589	7367	0.000857601	21.1039
399	rs9860874	IPF	M01110.metal.pos.txt.gz	C	A	C	A	-0.2572	-0.0003	0.7356	0.7469	0.0298253	0.0025	6.49092e-18	0.9203	24589	7367	0.00301523	74.3596
400	rs10967305	IPF	M01114.metal.pos.txt.gz	C	T	C	T	-0.1437	-0.0035	0.4135	0.4068	0.0276121	0.0065	1.94795e-07	0.5936	24589	4934	0.00110026	27.0819
401	rs11073517	IPF	M01114.metal.pos.txt.gz	C	T	C	T	-0.175	-0.0024	0.7296	0.6777	0.0288768	0.0068	1.35927e-09	0.7206	24589	4934	0.00149138	36.7234
402	rs1123573	IPF	M01114.metal.pos.txt.gz	G	A	G	A	-0.1327	-0.0097	0.3867	0.3898	0.0282445	0.0066	2.62378e-06	0.1423	24589	4934	0.000896902	22.0719
403	rs11788059	IPF	M01114.metal.pos.txt.gz	C	T	C	T	0.1547	-0.0079	0.3648	0.3242	0.0283498	0.0067	4.84737e-08	0.2404	24589	4934	0.00120952	29.7745
404	rs1214759	IPF	M01114.metal.pos.txt.gz	G	A	G	A	0.1652	-0.0082	0.6292	0.6712	0.0292984	0.0067	1.71495e-08	0.2182	24589	4934	0.00129131	31.7906
405	rs12610495	IPF	M01114.metal.pos.txt.gz	G	A	G	A	0.2495	-0.005	0.2942	0.292	0.0304576	0.01	2.57551e-16	0.6171	23506	3487	0.00284664	67.0983
406	rs12753958	IPF	M01114.metal.pos.txt.gz	G	T	G	T	-0.1753	0.0033	0.8151	0.8492	0.0349894	0.0099	5.44049e-07	0.7406	24589	4934	0.00101978	25.099
407	rs2076295	IPF	M01114.metal.pos.txt.gz	G	T	G	T	0.3966	0.0101	0.4145	0.4458	0.0270852	0.0067	1.49989e-48	0.1313	24589	4934	0.00864432	214.391
408	rs2197025	IPF	M01114.metal.pos.txt.gz	G	A	G	A	-0.144	0.0019	0.4483	0.4866	0.0276121	0.0077	1.83716e-07	0.8074	24589	4934	0.00110485	27.1951
409	rs2609259	IPF	M01114.metal.pos.txt.gz	C	A	C	A	-0.2642	-0.0026	0.7654	0.782	0.0316169	0.0081	6.4725e-17	0.7486	24589	4934	0.00283174	69.8218
410	rs2967465	IPF	M01114.metal.pos.txt.gz	G	A	G	A	-0.2037	0.01	0.1113	0.1298	0.0407858	0.01	5.90247e-07	0.3187	24589	4934	0.0010134	24.9418
411	rs3808803	IPF	M01114.metal.pos.txt.gz	C	T	C	T	-0.1278	-0.008	0.5358	0.5506	0.0272959	0.0066	2.8407e-06	0.2254	24589	4934	0.000890712	21.9195
412	rs4233306	IPF	M01114.metal.pos.txt.gz	C	T	C	T	0.2068	-0.0184	0.7913	0.8003	0.0349894	0.0082	3.41357e-09	0.02547	24589	4934	0.00141864	34.9295
413	rs4642211	IPF	M01114.metal.pos.txt.gz	C	T	C	T	-0.1422	-0.0063	0.3539	0.3586	0.0285606	0.0067	6.39523e-07	0.3461	24589	4934	0.00100713	24.7873
414	rs6560861	IPF	M01114.metal.pos.txt.gz	G	A	G	A	0.1636	-0.001	0.1928	0.1841	0.0346732	0.0084	2.3778e-06	0.9063	24589	4934	0.000904574	22.2609
415	rs6786378	IPF	M01114.metal.pos.txt.gz	C	A	C	A	-0.1786	-0.0208	0.159	0.1474	0.0384673	0.0097	3.43537e-06	0.0321	24589	4934	0.000875909	21.5549
416	rs7100920	IPF	M01114.metal.pos.txt.gz	C	T	C	T	-0.1744	-0.0009	0.4612	0.5066	0.0272959	0.0066	1.66726e-10	0.8927	24589	4934	0.00165743	40.8189
417	rs7138541	IPF	M01114.metal.pos.txt.gz	G	A	G	A	-0.1298	0.0024	0.3986	0.408	0.0280337	0.0066	3.65408e-06	0.7182	24589	4934	0.000871104	21.4365
418	rs751709	IPF	M01114.metal.pos.txt.gz	G	T	G	T	0.4781	-0.013	0.9761	0.9813	0.100858	0.0634	2.13372e-06	0.837	24589	1447	0.000913018	22.4689
419	rs757918	IPF	M01114.metal.pos.txt.gz	C	T	C	T	0.1254	-0.0013	0.4503	0.4993	0.0272959	0.0066	4.34644e-06	0.8409	24589	4934	0.000857601	21.1039
420	rs9860874	IPF	M01114.metal.pos.txt.gz	C	A	C	A	-0.2572	-0.0013	0.7356	0.7464	0.0298253	0.0074	6.49092e-18	0.8658	24589	4934	0.00301523	74.3596
421	rs10967305	IPF	M01121.metal.pos.txt.gz	C	T	C	T	-0.1437	0.0071	0.4135	0.4089	0.0276121	0.003	1.94795e-07	0.01923	24589	7349	0.00110026	27.0819
422	rs11073517	IPF	M01121.metal.pos.txt.gz	C	T	C	T	-0.175	-0.0002	0.7296	0.682	0.0288768	0.0032	1.35927e-09	0.9525	24589	7349	0.00149138	36.7234
423	rs1123573	IPF	M01121.metal.pos.txt.gz	G	A	G	A	-0.1327	-0.0008	0.3867	0.3926	0.0282445	0.0031	2.62378e-06	0.7854	24589	7349	0.000896902	22.0719
424	rs11788059	IPF	M01121.metal.pos.txt.gz	C	T	C	T	0.1547	-0.0038	0.3648	0.3231	0.0283498	0.0031	4.84737e-08	0.2293	24589	7349	0.00120952	29.7745
425	rs1214759	IPF	M01121.metal.pos.txt.gz	G	A	G	A	0.1652	0.0013	0.6292	0.6676	0.0292984	0.0031	1.71495e-08	0.6685	24589	7349	0.00129131	31.7906
426	rs12610495	IPF	M01121.metal.pos.txt.gz	G	A	G	A	0.2495	0.003	0.2942	0.292	0.0304576	0.0053	2.57551e-16	0.571	23506	5581	0.00284664	67.0983
427	rs12753958	IPF	M01121.metal.pos.txt.gz	G	T	G	T	-0.1753	-0.0008	0.8151	0.84	0.0349894	0.0043	5.44049e-07	0.8524	24589	7349	0.00101978	25.099
428	rs2076295	IPF	M01121.metal.pos.txt.gz	G	T	G	T	0.3966	0.0008	0.4145	0.4497	0.0270852	0.0031	1.49989e-48	0.8079	24589	7349	0.00864432	214.391
429	rs2197025	IPF	M01121.metal.pos.txt.gz	G	A	G	A	-0.144	-0.0022	0.4483	0.488	0.0276121	0.0031	1.83716e-07	0.4836	24589	7349	0.00110485	27.1951
430	rs2609259	IPF	M01121.metal.pos.txt.gz	C	A	C	A	-0.2642	0.0036	0.7654	0.7824	0.0316169	0.0033	6.4725e-17	0.2751	24589	7349	0.00283174	69.8218
431	rs2967465	IPF	M01121.metal.pos.txt.gz	G	A	G	A	-0.2037	0.0065	0.1113	0.1282	0.0407858	0.0042	5.90247e-07	0.1215	24589	7349	0.0010134	24.9418
432	rs3808803	IPF	M01121.metal.pos.txt.gz	C	T	C	T	-0.1278	-0.0006	0.5358	0.549	0.0272959	0.0031	2.8407e-06	0.8433	24589	7349	0.000890712	21.9195
433	rs4233306	IPF	M01121.metal.pos.txt.gz	C	T	C	T	0.2068	0.0001	0.7913	0.8018	0.0349894	0.0034	3.41357e-09	0.9771	24589	7349	0.00141864	34.9295
434	rs4642211	IPF	M01121.metal.pos.txt.gz	C	T	C	T	-0.1422	-0.0025	0.3539	0.3524	0.0285606	0.0031	6.39523e-07	0.4274	24589	7349	0.00100713	24.7873
435	rs6560861	IPF	M01121.metal.pos.txt.gz	G	A	G	A	0.1636	0.0057	0.1928	0.1831	0.0346732	0.004	2.3778e-06	0.153	24589	7349	0.000904574	22.2609
436	rs6786378	IPF	M01121.metal.pos.txt.gz	C	A	C	A	-0.1786	0.0009	0.159	0.1464	0.0384673	0.0041	3.43537e-06	0.8223	24589	7349	0.000875909	21.5549
437	rs7100920	IPF	M01121.metal.pos.txt.gz	C	T	C	T	-0.1744	0	0.4612	0.5102	0.0272959	0.0031	1.66726e-10	0.9986	24589	7349	0.00165743	40.8189
438	rs7138541	IPF	M01121.metal.pos.txt.gz	G	A	G	A	-0.1298	-0.0004	0.3986	0.4167	0.0280337	0.0031	3.65408e-06	0.8901	24589	7349	0.000871104	21.4365
439	rs751709	IPF	M01121.metal.pos.txt.gz	G	T	G	T	0.4781	0.04	0.9761	0.9813	0.100858	0.0234	2.13372e-06	0.0883	24589	1768	0.000913018	22.4689
440	rs757918	IPF	M01121.metal.pos.txt.gz	C	T	C	T	0.1254	-0.0014	0.4503	0.4973	0.0272959	0.0031	4.34644e-06	0.6461	24589	7349	0.000857601	21.1039
441	rs9860874	IPF	M01121.metal.pos.txt.gz	C	A	C	A	-0.2572	-0.0005	0.7356	0.7459	0.0298253	0.0032	6.49092e-18	0.8773	24589	7349	0.00301523	74.3596
442	rs10967305	IPF	M01123.metal.pos.txt.gz	C	T	C	T	-0.1437	-0.0136	0.4135	0.4092	0.0276121	0.0103	1.94795e-07	0.1878	24589	2639	0.00110026	27.0819
443	rs11073517	IPF	M01123.metal.pos.txt.gz	C	T	C	T	-0.175	-0.002	0.7296	0.6942	0.0288768	0.0112	1.35927e-09	0.8594	24589	2639	0.00149138	36.7234
444	rs1123573	IPF	M01123.metal.pos.txt.gz	G	A	G	A	-0.1327	-0.0062	0.3867	0.3972	0.0282445	0.0107	2.62378e-06	0.5613	24589	2639	0.000896902	22.0719
445	rs11788059	IPF	M01123.metal.pos.txt.gz	C	T	C	T	0.1547	0.0155	0.3648	0.3193	0.0283498	0.0111	4.84737e-08	0.1614	24589	2639	0.00120952	29.7745
446	rs1214759	IPF	M01123.metal.pos.txt.gz	G	A	G	A	0.1652	-0.0163	0.6292	0.658	0.0292984	0.0109	1.71495e-08	0.1338	24589	2639	0.00129131	31.7906
447	rs12610495	IPF	M01123.metal.pos.txt.gz	G	A	G	A	0.2495	0.006	0.2942	0.292	0.0304576	0.028	2.57551e-16	0.8306	23506	908	0.00284664	67.0983
448	rs12753958	IPF	M01123.metal.pos.txt.gz	G	T	G	T	-0.1753	0.0042	0.8151	0.8197	0.0349894	0.0143	5.44049e-07	0.7711	24589	2639	0.00101978	25.099
449	rs2076295	IPF	M01123.metal.pos.txt.gz	G	T	G	T	0.3966	0.0232	0.4145	0.4545	0.0270852	0.0109	1.49989e-48	0.03387	24589	2639	0.00864432	214.391
450	rs2197025	IPF	M01123.metal.pos.txt.gz	G	A	G	A	-0.144	0	0.4483	0.4871	0.0276121	0.0114	1.83716e-07	0.9999	24589	2639	0.00110485	27.1951
451	rs2609259	IPF	M01123.metal.pos.txt.gz	C	A	C	A	-0.2642	0.0182	0.7654	0.78	0.0316169	0.0122	6.4725e-17	0.1365	24589	2639	0.00283174	69.8218
452	rs2967465	IPF	M01123.metal.pos.txt.gz	G	A	G	A	-0.2037	-0.0006	0.1113	0.1198	0.0407858	0.0163	5.90247e-07	0.9722	24589	2639	0.0010134	24.9418
453	rs3808803	IPF	M01123.metal.pos.txt.gz	C	T	C	T	-0.1278	0.0107	0.5358	0.5455	0.0272959	0.0104	2.8407e-06	0.3055	24589	2639	0.000890712	21.9195
454	rs4233306	IPF	M01123.metal.pos.txt.gz	C	T	C	T	0.2068	0.0055	0.7913	0.8026	0.0349894	0.0132	3.41357e-09	0.6789	24589	2639	0.00141864	34.9295
455	rs4642211	IPF	M01123.metal.pos.txt.gz	C	T	C	T	-0.1422	-0.0061	0.3539	0.339	0.0285606	0.0109	6.39523e-07	0.576	24589	2639	0.00100713	24.7873
456	rs6560861	IPF	M01123.metal.pos.txt.gz	G	A	G	A	0.1636	0.0089	0.1928	0.1831	0.0346732	0.0144	2.3778e-06	0.5348	24589	2639	0.000904574	22.2609
457	rs6786378	IPF	M01123.metal.pos.txt.gz	C	A	C	A	-0.1786	0.0164	0.159	0.1443	0.0384673	0.0149	3.43537e-06	0.2724	24589	2639	0.000875909	21.5549
458	rs7100920	IPF	M01123.metal.pos.txt.gz	C	T	C	T	-0.1744	0.0049	0.4612	0.5162	0.0272959	0.0107	1.66726e-10	0.6436	24589	2639	0.00165743	40.8189
459	rs7138541	IPF	M01123.metal.pos.txt.gz	G	A	G	A	-0.1298	0.0021	0.3986	0.4319	0.0280337	0.0106	3.65408e-06	0.8461	24589	2639	0.000871104	21.4365
460	rs751709	IPF	M01123.metal.pos.txt.gz	G	T	G	T	0.4781	0.0358	0.9761	0.9811	0.100858	0.0629	2.13372e-06	0.5693	24589	1731	0.000913018	22.4689
461	rs757918	IPF	M01123.metal.pos.txt.gz	C	T	C	T	0.1254	0.0007	0.4503	0.4937	0.0272959	0.0106	4.34644e-06	0.9439	24589	2639	0.000857601	21.1039
462	rs9860874	IPF	M01123.metal.pos.txt.gz	C	A	C	A	-0.2572	-0.0004	0.7356	0.7424	0.0298253	0.0117	6.49092e-18	0.9756	24589	2639	0.00301523	74.3596
463	rs10967305	IPF	M01125.metal.pos.txt.gz	C	T	C	T	-0.1437	0.0004	0.4135	0.4088	0.0276121	0.0015	1.94795e-07	0.7903	24589	7352	0.00110026	27.0819
464	rs11073517	IPF	M01125.metal.pos.txt.gz	C	T	C	T	-0.175	-0.0006	0.7296	0.6793	0.0288768	0.0016	1.35927e-09	0.7123	24589	7352	0.00149138	36.7234
465	rs1123573	IPF	M01125.metal.pos.txt.gz	G	A	G	A	-0.1327	-0.0009	0.3867	0.392	0.0282445	0.0016	2.62378e-06	0.5658	24589	7352	0.000896902	22.0719
466	rs11788059	IPF	M01125.metal.pos.txt.gz	C	T	C	T	0.1547	-0.0014	0.3648	0.3242	0.0283498	0.0016	4.84737e-08	0.3933	24589	7352	0.00120952	29.7745
467	rs1214759	IPF	M01125.metal.pos.txt.gz	G	A	G	A	0.1652	0.002	0.6292	0.6694	0.0292984	0.0016	1.71495e-08	0.212	24589	7352	0.00129131	31.7906
468	rs12610495	IPF	M01125.metal.pos.txt.gz	G	A	G	A	0.2495	0	0.2942	0.292	0.0304576	0.002	2.57551e-16	1	23506	5588	0.00284664	67.0983
469	rs12753958	IPF	M01125.metal.pos.txt.gz	G	T	G	T	-0.1753	-0.0016	0.8151	0.8457	0.0349894	0.0022	5.44049e-07	0.4571	24589	7352	0.00101978	25.099
470	rs2076295	IPF	M01125.metal.pos.txt.gz	G	T	G	T	0.3966	0.002	0.4145	0.4483	0.0270852	0.0016	1.49989e-48	0.1957	24589	7352	0.00864432	214.391
471	rs2197025	IPF	M01125.metal.pos.txt.gz	G	A	G	A	-0.144	-0.0003	0.4483	0.4879	0.0276121	0.0016	1.83716e-07	0.8533	24589	7352	0.00110485	27.1951
472	rs2609259	IPF	M01125.metal.pos.txt.gz	C	A	C	A	-0.2642	-0.004	0.7654	0.7827	0.0316169	0.0016	6.4725e-17	0.0148	24589	7352	0.00283174	69.8218
473	rs2967465	IPF	M01125.metal.pos.txt.gz	G	A	G	A	-0.2037	-0.0005	0.1113	0.1315	0.0407858	0.0018	5.90247e-07	0.7924	24589	7352	0.0010134	24.9418
474	rs3808803	IPF	M01125.metal.pos.txt.gz	C	T	C	T	-0.1278	0.0018	0.5358	0.55	0.0272959	0.0015	2.8407e-06	0.2335	24589	7352	0.000890712	21.9195
475	rs4233306	IPF	M01125.metal.pos.txt.gz	C	T	C	T	0.2068	-0.0001	0.7913	0.8015	0.0349894	0.0017	3.41357e-09	0.9759	24589	7352	0.00141864	34.9295
476	rs4642211	IPF	M01125.metal.pos.txt.gz	C	T	C	T	-0.1422	-0.0005	0.3539	0.3558	0.0285606	0.0016	6.39523e-07	0.7284	24589	7352	0.00100713	24.7873
477	rs6560861	IPF	M01125.metal.pos.txt.gz	G	A	G	A	0.1636	-0.0008	0.1928	0.183	0.0346732	0.0017	2.3778e-06	0.657	24589	7352	0.000904574	22.2609
478	rs6786378	IPF	M01125.metal.pos.txt.gz	C	A	C	A	-0.1786	0.0005	0.159	0.1471	0.0384673	0.0017	3.43537e-06	0.7927	24589	7352	0.000875909	21.5549
479	rs7100920	IPF	M01125.metal.pos.txt.gz	C	T	C	T	-0.1744	0	0.4612	0.5093	0.0272959	0.0016	1.66726e-10	0.9927	24589	7352	0.00165743	40.8189
480	rs7138541	IPF	M01125.metal.pos.txt.gz	G	A	G	A	-0.1298	0.0006	0.3986	0.4127	0.0280337	0.0015	3.65408e-06	0.6933	24589	7352	0.000871104	21.4365
481	rs751709	IPF	M01125.metal.pos.txt.gz	G	T	G	T	0.4781	0.016	0.9761	0.9813	0.100858	0.013	2.13372e-06	0.2168	24589	1764	0.000913018	22.4689
482	rs757918	IPF	M01125.metal.pos.txt.gz	C	T	C	T	0.1254	0.0004	0.4503	0.4977	0.0272959	0.0016	4.34644e-06	0.7951	24589	7352	0.000857601	21.1039
483	rs9860874	IPF	M01125.metal.pos.txt.gz	C	A	C	A	-0.2572	-0.002	0.7356	0.7465	0.0298253	0.0016	6.49092e-18	0.2289	24589	7352	0.00301523	74.3596
484	rs10967305	IPF	M01284.metal.pos.txt.gz	C	T	C	T	-0.1437	-0.0003	0.4135	0.4084	0.0276121	0.0023	1.94795e-07	0.8871	24589	5687	0.00110026	27.0819
485	rs11073517	IPF	M01284.metal.pos.txt.gz	C	T	C	T	-0.175	0.0001	0.7296	0.679	0.0288768	0.0024	1.35927e-09	0.9768	24589	5687	0.00149138	36.7234
486	rs1123573	IPF	M01284.metal.pos.txt.gz	G	A	G	A	-0.1327	0.0012	0.3867	0.3919	0.0282445	0.0024	2.62378e-06	0.6276	24589	5687	0.000896902	22.0719
487	rs11788059	IPF	M01284.metal.pos.txt.gz	C	T	C	T	0.1547	-0.0018	0.3648	0.3239	0.0283498	0.0024	4.84737e-08	0.4559	24589	5687	0.00120952	29.7745
488	rs1214759	IPF	M01284.metal.pos.txt.gz	G	A	G	A	0.1652	-0.002	0.6292	0.6708	0.0292984	0.0024	1.71495e-08	0.4029	24589	5687	0.00129131	31.7906
489	rs12610495	IPF	M01284.metal.pos.txt.gz	G	A	G	A	0.2495	0	0.2942	0.292	0.0304576	0.004	2.57551e-16	1	23506	4008	0.00284664	67.0983
490	rs12753958	IPF	M01284.metal.pos.txt.gz	G	T	G	T	-0.1753	-0.0025	0.8151	0.8424	0.0349894	0.0035	5.44049e-07	0.478	24589	5687	0.00101978	25.099
491	rs2076295	IPF	M01284.metal.pos.txt.gz	G	T	G	T	0.3966	0.0008	0.4145	0.4495	0.0270852	0.0024	1.49989e-48	0.7384	24589	5687	0.00864432	214.391
492	rs2197025	IPF	M01284.metal.pos.txt.gz	G	A	G	A	-0.144	-0.001	0.4483	0.488	0.0276121	0.0024	1.83716e-07	0.6858	24589	5687	0.00110485	27.1951
493	rs2609259	IPF	M01284.metal.pos.txt.gz	C	A	C	A	-0.2642	-0.005	0.7654	0.7825	0.0316169	0.0025	6.4725e-17	0.04724	24589	5687	0.00283174	69.8218
494	rs2967465	IPF	M01284.metal.pos.txt.gz	G	A	G	A	-0.2037	-0.0029	0.1113	0.1296	0.0407858	0.0033	5.90247e-07	0.3916	24589	5687	0.0010134	24.9418
495	rs3808803	IPF	M01284.metal.pos.txt.gz	C	T	C	T	-0.1278	0.0048	0.5358	0.5503	0.0272959	0.0023	2.8407e-06	0.03944	24589	5687	0.000890712	21.9195
496	rs4233306	IPF	M01284.metal.pos.txt.gz	C	T	C	T	0.2068	0.0001	0.7913	0.802	0.0349894	0.0025	3.41357e-09	0.9536	24589	5687	0.00141864	34.9295
497	rs4642211	IPF	M01284.metal.pos.txt.gz	C	T	C	T	-0.1422	-0.0001	0.3539	0.3564	0.0285606	0.0024	6.39523e-07	0.9572	24589	5687	0.00100713	24.7873
498	rs6560861	IPF	M01284.metal.pos.txt.gz	G	A	G	A	0.1636	-0.0003	0.1928	0.1822	0.0346732	0.0032	2.3778e-06	0.9158	24589	5687	0.000904574	22.2609
499	rs6786378	IPF	M01284.metal.pos.txt.gz	C	A	C	A	-0.1786	-0.0006	0.159	0.146	0.0384673	0.0032	3.43537e-06	0.8572	24589	5687	0.000875909	21.5549
500	rs7100920	IPF	M01284.metal.pos.txt.gz	C	T	C	T	-0.1744	0.003	0.4612	0.5091	0.0272959	0.0024	1.66726e-10	0.2108	24589	5687	0.00165743	40.8189
501	rs7138541	IPF	M01284.metal.pos.txt.gz	G	A	G	A	-0.1298	-0.0009	0.3986	0.4109	0.0280337	0.0024	3.65408e-06	0.6951	24589	5687	0.000871104	21.4365
502	rs751709	IPF	M01284.metal.pos.txt.gz	G	T	G	T	0.4781	-0.0167	0.9761	0.9809	0.100858	0.0199	2.13372e-06	0.4036	24589	1679	0.000913018	22.4689
503	rs757918	IPF	M01284.metal.pos.txt.gz	C	T	C	T	0.1254	-0.0024	0.4503	0.4988	0.0272959	0.0024	4.34644e-06	0.3122	24589	5687	0.000857601	21.1039
504	rs9860874	IPF	M01284.metal.pos.txt.gz	C	A	C	A	-0.2572	0.0015	0.7356	0.7464	0.0298253	0.0025	6.49092e-18	0.5305	24589	5687	0.00301523	74.3596
505	rs10967305	IPF	M01299.metal.pos.txt.gz	C	T	C	T	-0.1437	-0.0002	0.4135	0.4086	0.0276121	0.0016	1.94795e-07	0.9144	24589	7358	0.00110026	27.0819
506	rs11073517	IPF	M01299.metal.pos.txt.gz	C	T	C	T	-0.175	-0.0002	0.7296	0.6783	0.0288768	0.0016	1.35927e-09	0.8796	24589	7358	0.00149138	36.7234
507	rs1123573	IPF	M01299.metal.pos.txt.gz	G	A	G	A	-0.1327	0	0.3867	0.3915	0.0282445	0.0016	2.62378e-06	0.9949	24589	7358	0.000896902	22.0719
508	rs11788059	IPF	M01299.metal.pos.txt.gz	C	T	C	T	0.1547	-0.0007	0.3648	0.3242	0.0283498	0.0016	4.84737e-08	0.6431	24589	7358	0.00120952	29.7745
509	rs1214759	IPF	M01299.metal.pos.txt.gz	G	A	G	A	0.1652	-0.0017	0.6292	0.6699	0.0292984	0.0016	1.71495e-08	0.2963	24589	7358	0.00129131	31.7906
510	rs12610495	IPF	M01299.metal.pos.txt.gz	G	A	G	A	0.2495	0	0.2942	0.292	0.0304576	0.002	2.57551e-16	1	23506	5597	0.00284664	67.0983
511	rs12753958	IPF	M01299.metal.pos.txt.gz	G	T	G	T	-0.1753	0.0018	0.8151	0.8476	0.0349894	0.0022	5.44049e-07	0.4108	24589	7358	0.00101978	25.099
512	rs2076295	IPF	M01299.metal.pos.txt.gz	G	T	G	T	0.3966	-0.0001	0.4145	0.4479	0.0270852	0.0016	1.49989e-48	0.9614	24589	7358	0.00864432	214.391
513	rs2197025	IPF	M01299.metal.pos.txt.gz	G	A	G	A	-0.144	-0.0014	0.4483	0.488	0.0276121	0.0016	1.83716e-07	0.4026	24589	7358	0.00110485	27.1951
514	rs2609259	IPF	M01299.metal.pos.txt.gz	C	A	C	A	-0.2642	-0.0012	0.7654	0.7827	0.0316169	0.0017	6.4725e-17	0.4744	24589	7358	0.00283174	69.8218
515	rs2967465	IPF	M01299.metal.pos.txt.gz	G	A	G	A	-0.2037	-0.003	0.1113	0.1285	0.0407858	0.0024	5.90247e-07	0.2179	24589	7358	0.0010134	24.9418
516	rs3808803	IPF	M01299.metal.pos.txt.gz	C	T	C	T	-0.1278	0.0002	0.5358	0.5501	0.0272959	0.0016	2.8407e-06	0.874	24589	7358	0.000890712	21.9195
517	rs4233306	IPF	M01299.metal.pos.txt.gz	C	T	C	T	0.2068	0.001	0.7913	0.8015	0.0349894	0.0017	3.41357e-09	0.5614	24589	7358	0.00141864	34.9295
518	rs4642211	IPF	M01299.metal.pos.txt.gz	C	T	C	T	-0.1422	-0.002	0.3539	0.3569	0.0285606	0.0016	6.39523e-07	0.2128	24589	7358	0.00100713	24.7873
519	rs6560861	IPF	M01299.metal.pos.txt.gz	G	A	G	A	0.1636	0.0021	0.1928	0.183	0.0346732	0.0017	2.3778e-06	0.2367	24589	7358	0.000904574	22.2609
520	rs6786378	IPF	M01299.metal.pos.txt.gz	C	A	C	A	-0.1786	-0.0006	0.159	0.1467	0.0384673	0.0023	3.43537e-06	0.8023	24589	7358	0.000875909	21.5549
521	rs7100920	IPF	M01299.metal.pos.txt.gz	C	T	C	T	-0.1744	-0.0026	0.4612	0.5087	0.0272959	0.0016	1.66726e-10	0.1033	24589	7358	0.00165743	40.8189
522	rs7138541	IPF	M01299.metal.pos.txt.gz	G	A	G	A	-0.1298	-0.0015	0.3986	0.4115	0.0280337	0.0016	3.65408e-06	0.351	24589	7358	0.000871104	21.4365
523	rs751709	IPF	M01299.metal.pos.txt.gz	G	T	G	T	0.4781	-0.0063	0.9761	0.9813	0.100858	0.0137	2.13372e-06	0.6436	24589	1761	0.000913018	22.4689
524	rs757918	IPF	M01299.metal.pos.txt.gz	C	T	C	T	0.1254	0.0016	0.4503	0.4982	0.0272959	0.0016	4.34644e-06	0.3098	24589	7358	0.000857601	21.1039
525	rs9860874	IPF	M01299.metal.pos.txt.gz	C	A	C	A	-0.2572	-0.0031	0.7356	0.7466	0.0298253	0.0016	6.49092e-18	0.05654	24589	7358	0.00301523	74.3596
526	rs10967305	IPF	M01301.metal.pos.txt.gz	C	T	C	T	-0.1437	-0.0013	0.4135	0.4084	0.0276121	0.0016	1.94795e-07	0.4318	24589	7363	0.00110026	27.0819
527	rs11073517	IPF	M01301.metal.pos.txt.gz	C	T	C	T	-0.175	0.0002	0.7296	0.6772	0.0288768	0.0017	1.35927e-09	0.8839	24589	7363	0.00149138	36.7234
528	rs1123573	IPF	M01301.metal.pos.txt.gz	G	A	G	A	-0.1327	-0.0014	0.3867	0.3908	0.0282445	0.0016	2.62378e-06	0.3819	24589	7363	0.000896902	22.0719
529	rs11788059	IPF	M01301.metal.pos.txt.gz	C	T	C	T	0.1547	-0.0001	0.3648	0.3247	0.0283498	0.0017	4.84737e-08	0.9332	24589	7363	0.00120952	29.7745
530	rs1214759	IPF	M01301.metal.pos.txt.gz	G	A	G	A	0.1652	0.0011	0.6292	0.6715	0.0292984	0.0017	1.71495e-08	0.5047	24589	7363	0.00129131	31.7906
531	rs12610495	IPF	M01301.metal.pos.txt.gz	G	A	G	A	0.2495	0.002	0.2942	0.292	0.0304576	0.002	2.57551e-16	0.3173	23506	5600	0.00284664	67.0983
532	rs12753958	IPF	M01301.metal.pos.txt.gz	G	T	G	T	-0.1753	-0.0024	0.8151	0.8513	0.0349894	0.0023	5.44049e-07	0.2927	24589	7363	0.00101978	25.099
533	rs2076295	IPF	M01301.metal.pos.txt.gz	G	T	G	T	0.3966	0.0005	0.4145	0.4473	0.0270852	0.0017	1.49989e-48	0.7465	24589	7363	0.00864432	214.391
534	rs2197025	IPF	M01301.metal.pos.txt.gz	G	A	G	A	-0.144	-0.001	0.4483	0.4881	0.0276121	0.0017	1.83716e-07	0.5654	24589	7363	0.00110485	27.1951
535	rs2609259	IPF	M01301.metal.pos.txt.gz	C	A	C	A	-0.2642	-0.0012	0.7654	0.7829	0.0316169	0.0017	6.4725e-17	0.4758	24589	7363	0.00283174	69.8218
536	rs2967465	IPF	M01301.metal.pos.txt.gz	G	A	G	A	-0.2037	-0.0023	0.1113	0.1325	0.0407858	0.0018	5.90247e-07	0.2116	24589	7363	0.0010134	24.9418
537	rs3808803	IPF	M01301.metal.pos.txt.gz	C	T	C	T	-0.1278	-0.0001	0.5358	0.5508	0.0272959	0.0016	2.8407e-06	0.9672	24589	7363	0.000890712	21.9195
538	rs4233306	IPF	M01301.metal.pos.txt.gz	C	T	C	T	0.2068	-0.0006	0.7913	0.8014	0.0349894	0.0017	3.41357e-09	0.7282	24589	7363	0.00141864	34.9295
539	rs4642211	IPF	M01301.metal.pos.txt.gz	C	T	C	T	-0.1422	-0.0009	0.3539	0.3587	0.0285606	0.0017	6.39523e-07	0.5728	24589	7363	0.00100713	24.7873
540	rs6560861	IPF	M01301.metal.pos.txt.gz	G	A	G	A	0.1636	0.0021	0.1928	0.1831	0.0346732	0.0018	2.3778e-06	0.245	24589	7363	0.000904574	22.2609
541	rs6786378	IPF	M01301.metal.pos.txt.gz	C	A	C	A	-0.1786	0.0007	0.159	0.1473	0.0384673	0.0018	3.43537e-06	0.6996	24589	7363	0.000875909	21.5549
542	rs7100920	IPF	M01301.metal.pos.txt.gz	C	T	C	T	-0.1744	-0.0001	0.4612	0.5077	0.0272959	0.0016	1.66726e-10	0.941	24589	7363	0.00165743	40.8189
543	rs7138541	IPF	M01301.metal.pos.txt.gz	G	A	G	A	-0.1298	0.0012	0.3986	0.4094	0.0280337	0.0016	3.65408e-06	0.4633	24589	7363	0.000871104	21.4365
544	rs751709	IPF	M01301.metal.pos.txt.gz	G	T	G	T	0.4781	0.0107	0.9761	0.9813	0.100858	0.015	2.13372e-06	0.476	24589	1763	0.000913018	22.4689
545	rs757918	IPF	M01301.metal.pos.txt.gz	C	T	C	T	0.1254	-0.0021	0.4503	0.4987	0.0272959	0.0016	4.34644e-06	0.2106	24589	7363	0.000857601	21.1039
546	rs9860874	IPF	M01301.metal.pos.txt.gz	C	A	C	A	-0.2572	0.0016	0.7356	0.747	0.0298253	0.0017	6.49092e-18	0.354	24589	7363	0.00301523	74.3596
547	rs10967305	IPF	M01302.metal.pos.txt.gz	C	T	C	T	-0.1437	0.0021	0.4135	0.409	0.0276121	0.0014	1.94795e-07	0.1336	24589	7347	0.00110026	27.0819
548	rs11073517	IPF	M01302.metal.pos.txt.gz	C	T	C	T	-0.175	-0.0002	0.7296	0.6823	0.0288768	0.0015	1.35927e-09	0.891	24589	7347	0.00149138	36.7234
549	rs1123573	IPF	M01302.metal.pos.txt.gz	G	A	G	A	-0.1327	0.0014	0.3867	0.3929	0.0282445	0.0014	2.62378e-06	0.3149	24589	7347	0.000896902	22.0719
550	rs11788059	IPF	M01302.metal.pos.txt.gz	C	T	C	T	0.1547	-0.0008	0.3648	0.3232	0.0283498	0.0015	4.84737e-08	0.5734	24589	7347	0.00120952	29.7745
551	rs1214759	IPF	M01302.metal.pos.txt.gz	G	A	G	A	0.1652	-0.0014	0.6292	0.667	0.0292984	0.0014	1.71495e-08	0.3382	24589	7347	0.00129131	31.7906
552	rs12610495	IPF	M01302.metal.pos.txt.gz	G	A	G	A	0.2495	-0.001	0.2942	0.292	0.0304576	0.002	2.57551e-16	0.6171	23506	5585	0.00284664	67.0983
553	rs12753958	IPF	M01302.metal.pos.txt.gz	G	T	G	T	-0.1753	-0.0002	0.8151	0.8389	0.0349894	0.002	5.44049e-07	0.9154	24589	7347	0.00101978	25.099
554	rs2076295	IPF	M01302.metal.pos.txt.gz	G	T	G	T	0.3966	0.0004	0.4145	0.45	0.0270852	0.0015	1.49989e-48	0.7871	24589	7347	0.00864432	214.391
555	rs2197025	IPF	M01302.metal.pos.txt.gz	G	A	G	A	-0.144	-0.0012	0.4483	0.488	0.0276121	0.0015	1.83716e-07	0.4197	24589	7347	0.00110485	27.1951
556	rs2609259	IPF	M01302.metal.pos.txt.gz	C	A	C	A	-0.2642	-0.0016	0.7654	0.7823	0.0316169	0.0015	6.4725e-17	0.3121	24589	7347	0.00283174	69.8218
557	rs2967465	IPF	M01302.metal.pos.txt.gz	G	A	G	A	-0.2037	-0.0041	0.1113	0.13	0.0407858	0.0017	5.90247e-07	0.01466	24589	7347	0.0010134	24.9418
558	rs3808803	IPF	M01302.metal.pos.txt.gz	C	T	C	T	-0.1278	0.0002	0.5358	0.5487	0.0272959	0.0014	2.8407e-06	0.9127	24589	7347	0.000890712	21.9195
559	rs4233306	IPF	M01302.metal.pos.txt.gz	C	T	C	T	0.2068	0.0012	0.7913	0.8017	0.0349894	0.0016	3.41357e-09	0.4605	24589	7347	0.00141864	34.9295
560	rs4642211	IPF	M01302.metal.pos.txt.gz	C	T	C	T	-0.1422	-0.0015	0.3539	0.3521	0.0285606	0.0015	6.39523e-07	0.3003	24589	7347	0.00100713	24.7873
561	rs6560861	IPF	M01302.metal.pos.txt.gz	G	A	G	A	0.1636	0.0001	0.1928	0.1831	0.0346732	0.0016	2.3778e-06	0.9565	24589	7347	0.000904574	22.2609
562	rs6786378	IPF	M01302.metal.pos.txt.gz	C	A	C	A	-0.1786	-0.0032	0.159	0.1469	0.0384673	0.0016	3.43537e-06	0.05367	24589	7347	0.000875909	21.5549
563	rs7100920	IPF	M01302.metal.pos.txt.gz	C	T	C	T	-0.1744	-0.0001	0.4612	0.5107	0.0272959	0.0014	1.66726e-10	0.9617	24589	7347	0.00165743	40.8189
564	rs7138541	IPF	M01302.metal.pos.txt.gz	G	A	G	A	-0.1298	-0.0018	0.3986	0.4175	0.0280337	0.0014	3.65408e-06	0.2131	24589	7347	0.000871104	21.4365
565	rs751709	IPF	M01302.metal.pos.txt.gz	G	T	G	T	0.4781	-0.0142	0.9761	0.9813	0.100858	0.0108	2.13372e-06	0.1858	24589	1762	0.000913018	22.4689
566	rs757918	IPF	M01302.metal.pos.txt.gz	C	T	C	T	0.1254	0.0024	0.4503	0.4972	0.0272959	0.0014	4.34644e-06	0.09549	24589	7347	0.000857601	21.1039
567	rs9860874	IPF	M01302.metal.pos.txt.gz	C	A	C	A	-0.2572	-0.0014	0.7356	0.746	0.0298253	0.0015	6.49092e-18	0.3639	24589	7347	0.00301523	74.3596
568	rs10967305	IPF	M01303.metal.pos.txt.gz	C	T	C	T	-0.1437	0.0019	0.4135	0.4077	0.0276121	0.0026	1.94795e-07	0.4735	24589	6946	0.00110026	27.0819
569	rs11073517	IPF	M01303.metal.pos.txt.gz	C	T	C	T	-0.175	0.0019	0.7296	0.6729	0.0288768	0.0027	1.35927e-09	0.4697	24589	6946	0.00149138	36.7234
570	rs1123573	IPF	M01303.metal.pos.txt.gz	G	A	G	A	-0.1327	0.0017	0.3867	0.3901	0.0282445	0.0026	2.62378e-06	0.5211	24589	6946	0.000896902	22.0719
571	rs11788059	IPF	M01303.metal.pos.txt.gz	C	T	C	T	0.1547	-0.0072	0.3648	0.3245	0.0283498	0.0027	4.84737e-08	0.006472	24589	6946	0.00120952	29.7745
572	rs1214759	IPF	M01303.metal.pos.txt.gz	G	A	G	A	0.1652	0.0033	0.6292	0.674	0.0292984	0.0026	1.71495e-08	0.2068	24589	6946	0.00129131	31.7906
573	rs12610495	IPF	M01303.metal.pos.txt.gz	G	A	G	A	0.2495	-0.004	0.2942	0.292	0.0304576	0.004	2.57551e-16	0.3173	23506	5368	0.00284664	67.0983
574	rs12753958	IPF	M01303.metal.pos.txt.gz	G	T	G	T	-0.1753	0.0003	0.8151	0.8565	0.0349894	0.0041	5.44049e-07	0.951	24589	6946	0.00101978	25.099
575	rs2076295	IPF	M01303.metal.pos.txt.gz	G	T	G	T	0.3966	-0.0018	0.4145	0.4453	0.0270852	0.0026	1.49989e-48	0.4989	24589	6946	0.00864432	214.391
576	rs2197025	IPF	M01303.metal.pos.txt.gz	G	A	G	A	-0.144	0.0016	0.4483	0.4885	0.0276121	0.0033	1.83716e-07	0.6167	24589	6946	0.00110485	27.1951
577	rs2609259	IPF	M01303.metal.pos.txt.gz	C	A	C	A	-0.2642	0.0034	0.7654	0.7816	0.0316169	0.0034	6.4725e-17	0.3185	24589	6946	0.00283174	69.8218
578	rs2967465	IPF	M01303.metal.pos.txt.gz	G	A	G	A	-0.2037	-0.0073	0.1113	0.1319	0.0407858	0.0036	5.90247e-07	0.04424	24589	6946	0.0010134	24.9418
579	rs3808803	IPF	M01303.metal.pos.txt.gz	C	T	C	T	-0.1278	-0.0025	0.5358	0.552	0.0272959	0.0026	2.8407e-06	0.3409	24589	6946	0.000890712	21.9195
580	rs4233306	IPF	M01303.metal.pos.txt.gz	C	T	C	T	0.2068	0.0003	0.7913	0.8014	0.0349894	0.0034	3.41357e-09	0.9322	24589	6946	0.00141864	34.9295
581	rs4642211	IPF	M01303.metal.pos.txt.gz	C	T	C	T	-0.1422	-0.0063	0.3539	0.362	0.0285606	0.0027	6.39523e-07	0.01729	24589	6946	0.00100713	24.7873
582	rs6560861	IPF	M01303.metal.pos.txt.gz	G	A	G	A	0.1636	0.0047	0.1928	0.1838	0.0346732	0.0035	2.3778e-06	0.1774	24589	6946	0.000904574	22.2609
583	rs6786378	IPF	M01303.metal.pos.txt.gz	C	A	C	A	-0.1786	-0.0059	0.159	0.1467	0.0384673	0.0035	3.43537e-06	0.09532	24589	6946	0.000875909	21.5549
584	rs7100920	IPF	M01303.metal.pos.txt.gz	C	T	C	T	-0.1744	0.0029	0.4612	0.5068	0.0272959	0.0026	1.66726e-10	0.2713	24589	6946	0.00165743	40.8189
585	rs7138541	IPF	M01303.metal.pos.txt.gz	G	A	G	A	-0.1298	0.0019	0.3986	0.4039	0.0280337	0.0026	3.65408e-06	0.4666	24589	6946	0.000871104	21.4365
586	rs751709	IPF	M01303.metal.pos.txt.gz	G	T	G	T	0.4781	-0.0231	0.9761	0.9808	0.100858	0.0283	2.13372e-06	0.4141	24589	1578	0.000913018	22.4689
587	rs757918	IPF	M01303.metal.pos.txt.gz	C	T	C	T	0.1254	-0.0024	0.4503	0.4991	0.0272959	0.0026	4.34644e-06	0.3687	24589	6946	0.000857601	21.1039
588	rs9860874	IPF	M01303.metal.pos.txt.gz	C	A	C	A	-0.2572	-0.0002	0.7356	0.7477	0.0298253	0.0027	6.49092e-18	0.9337	24589	6946	0.00301523	74.3596
589	rs10967305	IPF	M01336.metal.pos.txt.gz	C	T	C	T	-0.1437	0.0042	0.4135	0.408	0.0276121	0.0017	1.94795e-07	0.01333	24589	7352	0.00110026	27.0819
590	rs11073517	IPF	M01336.metal.pos.txt.gz	C	T	C	T	-0.175	0.0001	0.7296	0.6818	0.0288768	0.0023	1.35927e-09	0.9593	24589	7352	0.00149138	36.7234
591	rs1123573	IPF	M01336.metal.pos.txt.gz	G	A	G	A	-0.1327	0.0011	0.3867	0.3904	0.0282445	0.0017	2.62378e-06	0.5325	24589	7352	0.000896902	22.0719
592	rs11788059	IPF	M01336.metal.pos.txt.gz	C	T	C	T	0.1547	-0.0057	0.3648	0.3232	0.0283498	0.0022	4.84737e-08	0.01074	24589	7352	0.00120952	29.7745
593	rs1214759	IPF	M01336.metal.pos.txt.gz	G	A	G	A	0.1652	0.0009	0.6292	0.6677	0.0292984	0.0022	1.71495e-08	0.6932	24589	7352	0.00129131	31.7906
594	rs12610495	IPF	M01336.metal.pos.txt.gz	G	A	G	A	0.2495	0.001	0.2942	0.292	0.0304576	0.003	2.57551e-16	0.7389	23506	5586	0.00284664	67.0983
595	rs12753958	IPF	M01336.metal.pos.txt.gz	G	T	G	T	-0.1753	0	0.8151	0.8448	0.0349894	0.0029	5.44049e-07	0.9868	24589	7352	0.00101978	25.099
596	rs2076295	IPF	M01336.metal.pos.txt.gz	G	T	G	T	0.3966	-0.003	0.4145	0.4465	0.0270852	0.0017	1.49989e-48	0.07753	24589	7352	0.00864432	214.391
597	rs2197025	IPF	M01336.metal.pos.txt.gz	G	A	G	A	-0.144	0.0001	0.4483	0.4879	0.0276121	0.0022	1.83716e-07	0.9576	24589	7352	0.00110485	27.1951
598	rs2609259	IPF	M01336.metal.pos.txt.gz	C	A	C	A	-0.2642	0.0028	0.7654	0.7823	0.0316169	0.0023	6.4725e-17	0.2371	24589	7352	0.00283174	69.8218
599	rs2967465	IPF	M01336.metal.pos.txt.gz	G	A	G	A	-0.2037	0.0052	0.1113	0.1304	0.0407858	0.0026	5.90247e-07	0.04532	24589	7352	0.0010134	24.9418
600	rs3808803	IPF	M01336.metal.pos.txt.gz	C	T	C	T	-0.1278	-0.0015	0.5358	0.5513	0.0272959	0.0017	2.8407e-06	0.3783	24589	7352	0.000890712	21.9195
601	rs4233306	IPF	M01336.metal.pos.txt.gz	C	T	C	T	0.2068	-0.0008	0.7913	0.8018	0.0349894	0.0024	3.41357e-09	0.7318	24589	7352	0.00141864	34.9295
602	rs4642211	IPF	M01336.metal.pos.txt.gz	C	T	C	T	-0.1422	-0.0018	0.3539	0.3606	0.0285606	0.0017	6.39523e-07	0.2997	24589	7352	0.00100713	24.7873
603	rs6560861	IPF	M01336.metal.pos.txt.gz	G	A	G	A	0.1636	0.0042	0.1928	0.1832	0.0346732	0.0025	2.3778e-06	0.09049	24589	7352	0.000904574	22.2609
604	rs6786378	IPF	M01336.metal.pos.txt.gz	C	A	C	A	-0.1786	-0.0012	0.159	0.1469	0.0384673	0.0025	3.43537e-06	0.6341	24589	7352	0.000875909	21.5549
605	rs7100920	IPF	M01336.metal.pos.txt.gz	C	T	C	T	-0.1744	-0.0005	0.4612	0.5073	0.0272959	0.0017	1.66726e-10	0.7476	24589	7352	0.00165743	40.8189
606	rs7138541	IPF	M01336.metal.pos.txt.gz	G	A	G	A	-0.1298	-0.0017	0.3986	0.4067	0.0280337	0.0017	3.65408e-06	0.327	24589	7352	0.000871104	21.4365
607	rs751709	IPF	M01336.metal.pos.txt.gz	G	T	G	T	0.4781	-0.0037	0.9761	0.9815	0.100858	0.017	2.13372e-06	0.8277	24589	1766	0.000913018	22.4689
608	rs757918	IPF	M01336.metal.pos.txt.gz	C	T	C	T	0.1254	-0.0007	0.4503	0.4992	0.0272959	0.0017	4.34644e-06	0.6983	24589	7352	0.000857601	21.1039
609	rs9860874	IPF	M01336.metal.pos.txt.gz	C	A	C	A	-0.2572	0.0003	0.7356	0.746	0.0298253	0.0023	6.49092e-18	0.9016	24589	7352	0.00301523	74.3596
610	rs10967305	IPF	M01356.metal.pos.txt.gz	C	T	C	T	-0.1437	0.0037	0.4135	0.408	0.0276121	0.0025	1.94795e-07	0.1399	24589	7335	0.00110026	27.0819
611	rs11073517	IPF	M01356.metal.pos.txt.gz	C	T	C	T	-0.175	0.0006	0.7296	0.6762	0.0288768	0.0026	1.35927e-09	0.7992	24589	7335	0.00149138	36.7234
612	rs1123573	IPF	M01356.metal.pos.txt.gz	G	A	G	A	-0.1327	-0.0015	0.3867	0.3911	0.0282445	0.0025	2.62378e-06	0.5587	24589	7335	0.000896902	22.0719
613	rs11788059	IPF	M01356.metal.pos.txt.gz	C	T	C	T	0.1547	-0.0023	0.3648	0.325	0.0283498	0.0025	4.84737e-08	0.3573	24589	7335	0.00120952	29.7745
614	rs1214759	IPF	M01356.metal.pos.txt.gz	G	A	G	A	0.1652	-0.0022	0.6292	0.6722	0.0292984	0.0025	1.71495e-08	0.3882	24589	7335	0.00129131	31.7906
615	rs12610495	IPF	M01356.metal.pos.txt.gz	G	A	G	A	0.2495	-0.001	0.2942	0.292	0.0304576	0.004	2.57551e-16	0.8026	23506	5580	0.00284664	67.0983
616	rs12753958	IPF	M01356.metal.pos.txt.gz	G	T	G	T	-0.1753	-0.0006	0.8151	0.8498	0.0349894	0.0038	5.44049e-07	0.8652	24589	7335	0.00101978	25.099
617	rs2076295	IPF	M01356.metal.pos.txt.gz	G	T	G	T	0.3966	0.0007	0.4145	0.4465	0.0270852	0.0025	1.49989e-48	0.7908	24589	7335	0.00864432	214.391
618	rs2197025	IPF	M01356.metal.pos.txt.gz	G	A	G	A	-0.144	-0.0038	0.4483	0.4878	0.0276121	0.0031	1.83716e-07	0.212	24589	7335	0.00110485	27.1951
619	rs2609259	IPF	M01356.metal.pos.txt.gz	C	A	C	A	-0.2642	-0.0012	0.7654	0.7824	0.0316169	0.0032	6.4725e-17	0.6985	24589	7335	0.00283174	69.8218
620	rs2967465	IPF	M01356.metal.pos.txt.gz	G	A	G	A	-0.2037	0.0069	0.1113	0.131	0.0407858	0.0035	5.90247e-07	0.04658	24589	7335	0.0010134	24.9418
621	rs3808803	IPF	M01356.metal.pos.txt.gz	C	T	C	T	-0.1278	-0.002	0.5358	0.551	0.0272959	0.0025	2.8407e-06	0.421	24589	7335	0.000890712	21.9195
622	rs4233306	IPF	M01356.metal.pos.txt.gz	C	T	C	T	0.2068	0.0007	0.7913	0.8016	0.0349894	0.0033	3.41357e-09	0.8411	24589	7335	0.00141864	34.9295
623	rs4642211	IPF	M01356.metal.pos.txt.gz	C	T	C	T	-0.1422	-0.004	0.3539	0.3596	0.0285606	0.0025	6.39523e-07	0.1174	24589	7335	0.00100713	24.7873
624	rs6560861	IPF	M01356.metal.pos.txt.gz	G	A	G	A	0.1636	-0.0013	0.1928	0.183	0.0346732	0.0034	2.3778e-06	0.6936	24589	7335	0.000904574	22.2609
625	rs6786378	IPF	M01356.metal.pos.txt.gz	C	A	C	A	-0.1786	-0.0025	0.159	0.1471	0.0384673	0.0034	3.43537e-06	0.4557	24589	7335	0.000875909	21.5549
626	rs7100920	IPF	M01356.metal.pos.txt.gz	C	T	C	T	-0.1744	0.0009	0.4612	0.5075	0.0272959	0.0025	1.66726e-10	0.7218	24589	7335	0.00165743	40.8189
627	rs7138541	IPF	M01356.metal.pos.txt.gz	G	A	G	A	-0.1298	-0.0046	0.3986	0.408	0.0280337	0.0025	3.65408e-06	0.06723	24589	7335	0.000871104	21.4365
628	rs751709	IPF	M01356.metal.pos.txt.gz	G	T	G	T	0.4781	0.0373	0.9761	0.9812	0.100858	0.0237	2.13372e-06	0.1155	24589	1755	0.000913018	22.4689
629	rs757918	IPF	M01356.metal.pos.txt.gz	C	T	C	T	0.1254	-0.0011	0.4503	0.4989	0.0272959	0.0025	4.34644e-06	0.6582	24589	7335	0.000857601	21.1039
630	rs9860874	IPF	M01356.metal.pos.txt.gz	C	A	C	A	-0.2572	0.0038	0.7356	0.7471	0.0298253	0.0026	6.49092e-18	0.143	24589	7335	0.00301523	74.3596
631	rs10967305	IPF	M01358.metal.pos.txt.gz	C	T	C	T	-0.1437	0.0028	0.4135	0.408	0.0276121	0.0017	1.94795e-07	0.09637	24589	7355	0.00110026	27.0819
632	rs11073517	IPF	M01358.metal.pos.txt.gz	C	T	C	T	-0.175	-0.0002	0.7296	0.6751	0.0288768	0.0017	1.35927e-09	0.8989	24589	7355	0.00149138	36.7234
633	rs1123573	IPF	M01358.metal.pos.txt.gz	G	A	G	A	-0.1327	-0.0001	0.3867	0.3904	0.0282445	0.0017	2.62378e-06	0.9327	24589	7355	0.000896902	22.0719
634	rs11788059	IPF	M01358.metal.pos.txt.gz	C	T	C	T	0.1547	-0.0038	0.3648	0.3253	0.0283498	0.0017	4.84737e-08	0.02927	24589	7355	0.00120952	29.7745
635	rs1214759	IPF	M01358.metal.pos.txt.gz	G	A	G	A	0.1652	-0.0006	0.6292	0.6728	0.0292984	0.0017	1.71495e-08	0.7331	24589	7355	0.00129131	31.7906
636	rs12610495	IPF	M01358.metal.pos.txt.gz	G	A	G	A	0.2495	0.001	0.2942	0.292	0.0304576	0.003	2.57551e-16	0.7389	23506	5590	0.00284664	67.0983
637	rs12753958	IPF	M01358.metal.pos.txt.gz	G	T	G	T	-0.1753	-0.0007	0.8151	0.8454	0.0349894	0.0029	5.44049e-07	0.7991	24589	7355	0.00101978	25.099
638	rs2076295	IPF	M01358.metal.pos.txt.gz	G	T	G	T	0.3966	-0.0026	0.4145	0.4464	0.0270852	0.0017	1.49989e-48	0.1325	24589	7355	0.00864432	214.391
639	rs2197025	IPF	M01358.metal.pos.txt.gz	G	A	G	A	-0.144	-0.0008	0.4483	0.488	0.0276121	0.0023	1.83716e-07	0.7245	24589	7355	0.00110485	27.1951
640	rs2609259	IPF	M01358.metal.pos.txt.gz	C	A	C	A	-0.2642	0.0011	0.7654	0.7824	0.0316169	0.0024	6.4725e-17	0.6304	24589	7355	0.00283174	69.8218
641	rs2967465	IPF	M01358.metal.pos.txt.gz	G	A	G	A	-0.2037	0.0059	0.1113	0.1306	0.0407858	0.0026	5.90247e-07	0.02295	24589	7355	0.0010134	24.9418
642	rs3808803	IPF	M01358.metal.pos.txt.gz	C	T	C	T	-0.1278	-0.0007	0.5358	0.5514	0.0272959	0.0017	2.8407e-06	0.6692	24589	7355	0.000890712	21.9195
643	rs4233306	IPF	M01358.metal.pos.txt.gz	C	T	C	T	0.2068	-0.0008	0.7913	0.8017	0.0349894	0.0024	3.41357e-09	0.7536	24589	7355	0.00141864	34.9295
644	rs4642211	IPF	M01358.metal.pos.txt.gz	C	T	C	T	-0.1422	-0.0008	0.3539	0.361	0.0285606	0.0017	6.39523e-07	0.633	24589	7355	0.00100713	24.7873
645	rs6560861	IPF	M01358.metal.pos.txt.gz	G	A	G	A	0.1636	0.0013	0.1928	0.1832	0.0346732	0.0025	2.3778e-06	0.6085	24589	7355	0.000904574	22.2609
646	rs6786378	IPF	M01358.metal.pos.txt.gz	C	A	C	A	-0.1786	-0.0024	0.159	0.1469	0.0384673	0.0025	3.43537e-06	0.3472	24589	7355	0.000875909	21.5549
647	rs7100920	IPF	M01358.metal.pos.txt.gz	C	T	C	T	-0.1744	0.0007	0.4612	0.5071	0.0272959	0.0017	1.66726e-10	0.6944	24589	7355	0.00165743	40.8189
648	rs7138541	IPF	M01358.metal.pos.txt.gz	G	A	G	A	-0.1298	-0.002	0.3986	0.4063	0.0280337	0.0017	3.65408e-06	0.2424	24589	7355	0.000871104	21.4365
649	rs751709	IPF	M01358.metal.pos.txt.gz	G	T	G	T	0.4781	0.0169	0.9761	0.9815	0.100858	0.0173	2.13372e-06	0.3292	24589	1765	0.000913018	22.4689
650	rs757918	IPF	M01358.metal.pos.txt.gz	C	T	C	T	0.1254	0.0004	0.4503	0.4993	0.0272959	0.0017	4.34644e-06	0.8156	24589	7355	0.000857601	21.1039
651	rs9860874	IPF	M01358.metal.pos.txt.gz	C	A	C	A	-0.2572	0.0009	0.7356	0.7461	0.0298253	0.0023	6.49092e-18	0.69	24589	7355	0.00301523	74.3596
652	rs10967305	IPF	M01359.metal.pos.txt.gz	C	T	C	T	-0.1437	0.0045	0.4135	0.4085	0.0276121	0.0023	1.94795e-07	0.0521	24589	7323	0.00110026	27.0819
653	rs11073517	IPF	M01359.metal.pos.txt.gz	C	T	C	T	-0.175	-0.0005	0.7296	0.6791	0.0288768	0.0024	1.35927e-09	0.8215	24589	7323	0.00149138	36.7234
654	rs1123573	IPF	M01359.metal.pos.txt.gz	G	A	G	A	-0.1327	0.0007	0.3867	0.3918	0.0282445	0.0023	2.62378e-06	0.7783	24589	7323	0.000896902	22.0719
655	rs11788059	IPF	M01359.metal.pos.txt.gz	C	T	C	T	0.1547	-0.0065	0.3648	0.3239	0.0283498	0.0024	4.84737e-08	0.005866	24589	7323	0.00120952	29.7745
656	rs1214759	IPF	M01359.metal.pos.txt.gz	G	A	G	A	0.1652	-0.0007	0.6292	0.6697	0.0292984	0.0024	1.71495e-08	0.7799	24589	7323	0.00129131	31.7906
657	rs12610495	IPF	M01359.metal.pos.txt.gz	G	A	G	A	0.2495	0.001	0.2942	0.292	0.0304576	0.004	2.57551e-16	0.8026	23506	5558	0.00284664	67.0983
658	rs12753958	IPF	M01359.metal.pos.txt.gz	G	T	G	T	-0.1753	0.0006	0.8151	0.8419	0.0349894	0.0035	5.44049e-07	0.8654	24589	7323	0.00101978	25.099
659	rs2076295	IPF	M01359.metal.pos.txt.gz	G	T	G	T	0.3966	-0.0054	0.4145	0.4483	0.0270852	0.0024	1.49989e-48	0.02188	24589	7323	0.00864432	214.391
660	rs2197025	IPF	M01359.metal.pos.txt.gz	G	A	G	A	-0.144	0.0007	0.4483	0.4879	0.0276121	0.0028	1.83716e-07	0.7952	24589	7323	0.00110485	27.1951
661	rs2609259	IPF	M01359.metal.pos.txt.gz	C	A	C	A	-0.2642	0.0033	0.7654	0.782	0.0316169	0.0029	6.4725e-17	0.2658	24589	7323	0.00283174	69.8218
662	rs2967465	IPF	M01359.metal.pos.txt.gz	G	A	G	A	-0.2037	0.0053	0.1113	0.1292	0.0407858	0.0033	5.90247e-07	0.1101	24589	7323	0.0010134	24.9418
663	rs3808803	IPF	M01359.metal.pos.txt.gz	C	T	C	T	-0.1278	-0.002	0.5358	0.55	0.0272959	0.0023	2.8407e-06	0.3912	24589	7323	0.000890712	21.9195
664	rs4233306	IPF	M01359.metal.pos.txt.gz	C	T	C	T	0.2068	0.0006	0.7913	0.802	0.0349894	0.003	3.41357e-09	0.8476	24589	7323	0.00141864	34.9295
665	rs4642211	IPF	M01359.metal.pos.txt.gz	C	T	C	T	-0.1422	-0.0021	0.3539	0.3558	0.0285606	0.0024	6.39523e-07	0.3854	24589	7323	0.00100713	24.7873
666	rs6560861	IPF	M01359.metal.pos.txt.gz	G	A	G	A	0.1636	0.0042	0.1928	0.1832	0.0346732	0.0031	2.3778e-06	0.1814	24589	7323	0.000904574	22.2609
667	rs6786378	IPF	M01359.metal.pos.txt.gz	C	A	C	A	-0.1786	0.0009	0.159	0.1466	0.0384673	0.0032	3.43537e-06	0.7683	24589	7323	0.000875909	21.5549
668	rs7100920	IPF	M01359.metal.pos.txt.gz	C	T	C	T	-0.1744	-0.0003	0.4612	0.5091	0.0272959	0.0023	1.66726e-10	0.8883	24589	7323	0.00165743	40.8189
669	rs7138541	IPF	M01359.metal.pos.txt.gz	G	A	G	A	-0.1298	-0.0023	0.3986	0.4127	0.0280337	0.0023	3.65408e-06	0.3292	24589	7323	0.000871104	21.4365
670	rs751709	IPF	M01359.metal.pos.txt.gz	G	T	G	T	0.4781	0.0002	0.9761	0.9815	0.100858	0.0197	2.13372e-06	0.9928	24589	1765	0.000913018	22.4689
671	rs757918	IPF	M01359.metal.pos.txt.gz	C	T	C	T	0.1254	0.001	0.4503	0.4981	0.0272959	0.0023	4.34644e-06	0.6645	24589	7323	0.000857601	21.1039
672	rs9860874	IPF	M01359.metal.pos.txt.gz	C	A	C	A	-0.2572	0.0008	0.7356	0.7465	0.0298253	0.0024	6.49092e-18	0.7394	24589	7323	0.00301523	74.3596
673	rs10967305	IPF	M01361.metal.pos.txt.gz	C	T	C	T	-0.1437	0.0032	0.4135	0.4086	0.0276121	0.0025	1.94795e-07	0.1912	24589	7063	0.00110026	27.0819
674	rs11073517	IPF	M01361.metal.pos.txt.gz	C	T	C	T	-0.175	0.001	0.7296	0.6766	0.0288768	0.0025	1.35927e-09	0.6957	24589	7063	0.00149138	36.7234
675	rs1123573	IPF	M01361.metal.pos.txt.gz	G	A	G	A	-0.1327	-0.0003	0.3867	0.3911	0.0282445	0.0025	2.62378e-06	0.896	24589	7063	0.000896902	22.0719
676	rs11788059	IPF	M01361.metal.pos.txt.gz	C	T	C	T	0.1547	-0.0024	0.3648	0.3246	0.0283498	0.0025	4.84737e-08	0.3438	24589	7063	0.00120952	29.7745
677	rs1214759	IPF	M01361.metal.pos.txt.gz	G	A	G	A	0.1652	0.001	0.6292	0.6722	0.0292984	0.0025	1.71495e-08	0.6773	24589	7063	0.00129131	31.7906
678	rs12610495	IPF	M01361.metal.pos.txt.gz	G	A	G	A	0.2495	-0.005	0.2942	0.292	0.0304576	0.004	2.57551e-16	0.2113	23506	5363	0.00284664	67.0983
679	rs12753958	IPF	M01361.metal.pos.txt.gz	G	T	G	T	-0.1753	-0.0016	0.8151	0.8493	0.0349894	0.0038	5.44049e-07	0.6768	24589	7063	0.00101978	25.099
680	rs2076295	IPF	M01361.metal.pos.txt.gz	G	T	G	T	0.3966	-0.0009	0.4145	0.4468	0.0270852	0.0025	1.49989e-48	0.708	24589	7063	0.00864432	214.391
681	rs2197025	IPF	M01361.metal.pos.txt.gz	G	A	G	A	-0.144	0.0026	0.4483	0.4876	0.0276121	0.0025	1.83716e-07	0.2988	24589	7063	0.00110485	27.1951
682	rs2609259	IPF	M01361.metal.pos.txt.gz	C	A	C	A	-0.2642	0.0097	0.7654	0.783	0.0316169	0.0026	6.4725e-17	0.0002061	24589	7063	0.00283174	69.8218
683	rs2967465	IPF	M01361.metal.pos.txt.gz	G	A	G	A	-0.2037	-0.0029	0.1113	0.1307	0.0407858	0.0035	5.90247e-07	0.4077	24589	7063	0.0010134	24.9418
684	rs3808803	IPF	M01361.metal.pos.txt.gz	C	T	C	T	-0.1278	-0.0004	0.5358	0.5522	0.0272959	0.0025	2.8407e-06	0.8576	24589	7063	0.000890712	21.9195
685	rs4233306	IPF	M01361.metal.pos.txt.gz	C	T	C	T	0.2068	-0.0011	0.7913	0.8012	0.0349894	0.0026	3.41357e-09	0.6699	24589	7063	0.00141864	34.9295
686	rs4642211	IPF	M01361.metal.pos.txt.gz	C	T	C	T	-0.1422	-0.0026	0.3539	0.358	0.0285606	0.0025	6.39523e-07	0.3045	24589	7063	0.00100713	24.7873
687	rs6560861	IPF	M01361.metal.pos.txt.gz	G	A	G	A	0.1636	0.0026	0.1928	0.1828	0.0346732	0.0034	2.3778e-06	0.4466	24589	7063	0.000904574	22.2609
688	rs6786378	IPF	M01361.metal.pos.txt.gz	C	A	C	A	-0.1786	0.0034	0.159	0.1464	0.0384673	0.0034	3.43537e-06	0.3221	24589	7063	0.000875909	21.5549
689	rs7100920	IPF	M01361.metal.pos.txt.gz	C	T	C	T	-0.1744	0.0015	0.4612	0.5086	0.0272959	0.0025	1.66726e-10	0.5607	24589	7063	0.00165743	40.8189
690	rs7138541	IPF	M01361.metal.pos.txt.gz	G	A	G	A	-0.1298	0.0036	0.3986	0.4085	0.0280337	0.0025	3.65408e-06	0.1495	24589	7063	0.000871104	21.4365
691	rs751709	IPF	M01361.metal.pos.txt.gz	G	T	G	T	0.4781	0.0039	0.9761	0.9809	0.100858	0.0232	2.13372e-06	0.8653	24589	1700	0.000913018	22.4689
692	rs757918	IPF	M01361.metal.pos.txt.gz	C	T	C	T	0.1254	0.0016	0.4503	0.4992	0.0272959	0.0025	4.34644e-06	0.5282	24589	7063	0.000857601	21.1039
693	rs9860874	IPF	M01361.metal.pos.txt.gz	C	A	C	A	-0.2572	-0.0002	0.7356	0.7478	0.0298253	0.0026	6.49092e-18	0.9436	24589	7063	0.00301523	74.3596
694	rs10967305	IPF	M01365.metal.pos.txt.gz	C	T	C	T	-0.1437	0.006	0.4135	0.4083	0.0276121	0.0025	1.94795e-07	0.01522	24589	7362	0.00110026	27.0819
695	rs11073517	IPF	M01365.metal.pos.txt.gz	C	T	C	T	-0.175	-0.0006	0.7296	0.6762	0.0288768	0.0025	1.35927e-09	0.8183	24589	7362	0.00149138	36.7234
696	rs1123573	IPF	M01365.metal.pos.txt.gz	G	A	G	A	-0.1327	0.0003	0.3867	0.3906	0.0282445	0.0025	2.62378e-06	0.8932	24589	7362	0.000896902	22.0719
697	rs11788059	IPF	M01365.metal.pos.txt.gz	C	T	C	T	0.1547	-0.0069	0.3648	0.3248	0.0283498	0.0025	4.84737e-08	0.006253	24589	7362	0.00120952	29.7745
698	rs1214759	IPF	M01365.metal.pos.txt.gz	G	A	G	A	0.1652	-0.0009	0.6292	0.672	0.0292984	0.0025	1.71495e-08	0.7238	24589	7362	0.00129131	31.7906
699	rs12610495	IPF	M01365.metal.pos.txt.gz	G	A	G	A	0.2495	-0.001	0.2942	0.292	0.0304576	0.004	2.57551e-16	0.8026	23506	5594	0.00284664	67.0983
700	rs12753958	IPF	M01365.metal.pos.txt.gz	G	T	G	T	-0.1753	-0.0019	0.8151	0.8491	0.0349894	0.0038	5.44049e-07	0.6149	24589	7362	0.00101978	25.099
701	rs2076295	IPF	M01365.metal.pos.txt.gz	G	T	G	T	0.3966	-0.0025	0.4145	0.4469	0.0270852	0.0025	1.49989e-48	0.3317	24589	7362	0.00864432	214.391
702	rs2197025	IPF	M01365.metal.pos.txt.gz	G	A	G	A	-0.144	-0.0011	0.4483	0.488	0.0276121	0.0031	1.83716e-07	0.7083	24589	7362	0.00110485	27.1951
703	rs2609259	IPF	M01365.metal.pos.txt.gz	C	A	C	A	-0.2642	0.0021	0.7654	0.7825	0.0316169	0.0032	6.4725e-17	0.5055	24589	7362	0.00283174	69.8218
704	rs2967465	IPF	M01365.metal.pos.txt.gz	G	A	G	A	-0.2037	0.0008	0.1113	0.1308	0.0407858	0.0035	5.90247e-07	0.8131	24589	7362	0.0010134	24.9418
705	rs3808803	IPF	M01365.metal.pos.txt.gz	C	T	C	T	-0.1278	-0.0016	0.5358	0.5511	0.0272959	0.0025	2.8407e-06	0.516	24589	7362	0.000890712	21.9195
706	rs4233306	IPF	M01365.metal.pos.txt.gz	C	T	C	T	0.2068	-0.0028	0.7913	0.8017	0.0349894	0.0033	3.41357e-09	0.3913	24589	7362	0.00141864	34.9295
707	rs4642211	IPF	M01365.metal.pos.txt.gz	C	T	C	T	-0.1422	-0.0017	0.3539	0.3594	0.0285606	0.0025	6.39523e-07	0.4917	24589	7362	0.00100713	24.7873
708	rs6560861	IPF	M01365.metal.pos.txt.gz	G	A	G	A	0.1636	0.0048	0.1928	0.1831	0.0346732	0.0034	2.3778e-06	0.1502	24589	7362	0.000904574	22.2609
709	rs6786378	IPF	M01365.metal.pos.txt.gz	C	A	C	A	-0.1786	-0.0016	0.159	0.1469	0.0384673	0.0034	3.43537e-06	0.6266	24589	7362	0.000875909	21.5549
710	rs7100920	IPF	M01365.metal.pos.txt.gz	C	T	C	T	-0.1744	0.002	0.4612	0.5077	0.0272959	0.0025	1.66726e-10	0.4173	24589	7362	0.00165743	40.8189
711	rs7138541	IPF	M01365.metal.pos.txt.gz	G	A	G	A	-0.1298	-0.0003	0.3986	0.4082	0.0280337	0.0025	3.65408e-06	0.9101	24589	7362	0.000871104	21.4365
712	rs751709	IPF	M01365.metal.pos.txt.gz	G	T	G	T	0.4781	0.0162	0.9761	0.9813	0.100858	0.0236	2.13372e-06	0.4918	24589	1768	0.000913018	22.4689
713	rs757918	IPF	M01365.metal.pos.txt.gz	C	T	C	T	0.1254	0.0011	0.4503	0.499	0.0272959	0.0025	4.34644e-06	0.6543	24589	7362	0.000857601	21.1039
714	rs9860874	IPF	M01365.metal.pos.txt.gz	C	A	C	A	-0.2572	0.0008	0.7356	0.7471	0.0298253	0.0026	6.49092e-18	0.7552	24589	7362	0.00301523	74.3596
715	rs10967305	IPF	M01444.metal.pos.txt.gz	C	T	C	T	-0.1437	0.0013	0.4135	0.4081	0.0276121	0.0038	1.94795e-07	0.7278	24589	7345	0.00110026	27.0819
716	rs11073517	IPF	M01444.metal.pos.txt.gz	C	T	C	T	-0.175	0.0037	0.7296	0.6798	0.0288768	0.004	1.35927e-09	0.3492	24589	7345	0.00149138	36.7234
717	rs1123573	IPF	M01444.metal.pos.txt.gz	G	A	G	A	-0.1327	-0.0005	0.3867	0.3918	0.0282445	0.0039	2.62378e-06	0.8929	24589	7345	0.000896902	22.0719
718	rs11788059	IPF	M01444.metal.pos.txt.gz	C	T	C	T	0.1547	-0.0012	0.3648	0.3239	0.0283498	0.0039	4.84737e-08	0.7611	24589	7345	0.00120952	29.7745
719	rs1214759	IPF	M01444.metal.pos.txt.gz	G	A	G	A	0.1652	-0.0041	0.6292	0.6699	0.0292984	0.0039	1.71495e-08	0.2945	24589	7345	0.00129131	31.7906
720	rs12610495	IPF	M01444.metal.pos.txt.gz	G	A	G	A	0.2495	-0.006	0.2942	0.292	0.0304576	0.006	2.57551e-16	0.3173	23506	5592	0.00284664	67.0983
721	rs12753958	IPF	M01444.metal.pos.txt.gz	G	T	G	T	-0.1753	-0.0034	0.8151	0.8427	0.0349894	0.0056	5.44049e-07	0.5375	24589	7345	0.00101978	25.099
722	rs2076295	IPF	M01444.metal.pos.txt.gz	G	T	G	T	0.3966	0.0016	0.4145	0.4488	0.0270852	0.0039	1.49989e-48	0.6888	24589	7345	0.00864432	214.391
723	rs2197025	IPF	M01444.metal.pos.txt.gz	G	A	G	A	-0.144	-0.0063	0.4483	0.4881	0.0276121	0.0044	1.83716e-07	0.1464	24589	7345	0.00110485	27.1951
724	rs2609259	IPF	M01444.metal.pos.txt.gz	C	A	C	A	-0.2642	-0.001	0.7654	0.7823	0.0316169	0.0046	6.4725e-17	0.8264	24589	7345	0.00283174	69.8218
725	rs2967465	IPF	M01444.metal.pos.txt.gz	G	A	G	A	-0.2037	0.0016	0.1113	0.1285	0.0407858	0.0056	5.90247e-07	0.78	24589	7345	0.0010134	24.9418
726	rs3808803	IPF	M01444.metal.pos.txt.gz	C	T	C	T	-0.1278	-0.0019	0.5358	0.5503	0.0272959	0.0038	2.8407e-06	0.6281	24589	7345	0.000890712	21.9195
727	rs4233306	IPF	M01444.metal.pos.txt.gz	C	T	C	T	0.2068	0.0031	0.7913	0.802	0.0349894	0.0047	3.41357e-09	0.5049	24589	7345	0.00141864	34.9295
728	rs4642211	IPF	M01444.metal.pos.txt.gz	C	T	C	T	-0.1422	-0.0005	0.3539	0.3553	0.0285606	0.0039	6.39523e-07	0.8912	24589	7345	0.00100713	24.7873
729	rs6560861	IPF	M01444.metal.pos.txt.gz	G	A	G	A	0.1636	0.0051	0.1928	0.1831	0.0346732	0.0049	2.3778e-06	0.2921	24589	7345	0.000904574	22.2609
730	rs6786378	IPF	M01444.metal.pos.txt.gz	C	A	C	A	-0.1786	-0.0048	0.159	0.1462	0.0384673	0.0054	3.43537e-06	0.3759	24589	7345	0.000875909	21.5549
731	rs7100920	IPF	M01444.metal.pos.txt.gz	C	T	C	T	-0.1744	0.0018	0.4612	0.5092	0.0272959	0.0039	1.66726e-10	0.6461	24589	7345	0.00165743	40.8189
732	rs7138541	IPF	M01444.metal.pos.txt.gz	G	A	G	A	-0.1298	0.0022	0.3986	0.4135	0.0280337	0.0038	3.65408e-06	0.5657	24589	7345	0.000871104	21.4365
733	rs751709	IPF	M01444.metal.pos.txt.gz	G	T	G	T	0.4781	-0.0179	0.9761	0.9814	0.100858	0.0317	2.13372e-06	0.5733	24589	1753	0.000913018	22.4689
734	rs757918	IPF	M01444.metal.pos.txt.gz	C	T	C	T	0.1254	0.0009	0.4503	0.4978	0.0272959	0.0039	4.34644e-06	0.8163	24589	7345	0.000857601	21.1039
735	rs9860874	IPF	M01444.metal.pos.txt.gz	C	A	C	A	-0.2572	0.0068	0.7356	0.7467	0.0298253	0.004	6.49092e-18	0.09045	24589	7345	0.00301523	74.3596
736	rs10967305	IPF	M01493.metal.pos.txt.gz	C	T	C	T	-0.1437	0.0001	0.4135	0.4085	0.0276121	0.0024	1.94795e-07	0.9751	24589	7307	0.00110026	27.0819
737	rs11073517	IPF	M01493.metal.pos.txt.gz	C	T	C	T	-0.175	-0.0006	0.7296	0.6777	0.0288768	0.0025	1.35927e-09	0.8113	24589	7307	0.00149138	36.7234
738	rs1123573	IPF	M01493.metal.pos.txt.gz	G	A	G	A	-0.1327	0.0028	0.3867	0.3911	0.0282445	0.0024	2.62378e-06	0.2524	24589	7307	0.000896902	22.0719
739	rs11788059	IPF	M01493.metal.pos.txt.gz	C	T	C	T	0.1547	0.0027	0.3648	0.3243	0.0283498	0.0025	4.84737e-08	0.2653	24589	7307	0.00120952	29.7745
740	rs1214759	IPF	M01493.metal.pos.txt.gz	G	A	G	A	0.1652	0.0002	0.6292	0.6708	0.0292984	0.0024	1.71495e-08	0.9391	24589	7307	0.00129131	31.7906
741	rs12610495	IPF	M01493.metal.pos.txt.gz	G	A	G	A	0.2495	0	0.2942	0.292	0.0304576	0.003	2.57551e-16	1	23506	5541	0.00284664	67.0983
742	rs12753958	IPF	M01493.metal.pos.txt.gz	G	T	G	T	-0.1753	0.0052	0.8151	0.8535	0.0349894	0.0032	5.44049e-07	0.1027	24589	7307	0.00101978	25.099
743	rs2076295	IPF	M01493.metal.pos.txt.gz	G	T	G	T	0.3966	-0.0027	0.4145	0.4477	0.0270852	0.0024	1.49989e-48	0.2712	24589	7307	0.00864432	214.391
744	rs2197025	IPF	M01493.metal.pos.txt.gz	G	A	G	A	-0.144	0.0004	0.4483	0.4881	0.0276121	0.0025	1.83716e-07	0.8825	24589	7307	0.00110485	27.1951
745	rs2609259	IPF	M01493.metal.pos.txt.gz	C	A	C	A	-0.2642	0.0007	0.7654	0.7828	0.0316169	0.0025	6.4725e-17	0.7952	24589	7307	0.00283174	69.8218
746	rs2967465	IPF	M01493.metal.pos.txt.gz	G	A	G	A	-0.2037	0.0027	0.1113	0.1299	0.0407858	0.0034	5.90247e-07	0.4312	24589	7307	0.0010134	24.9418
747	rs3808803	IPF	M01493.metal.pos.txt.gz	C	T	C	T	-0.1278	0.002	0.5358	0.5504	0.0272959	0.0024	2.8407e-06	0.3989	24589	7307	0.000890712	21.9195
748	rs4233306	IPF	M01493.metal.pos.txt.gz	C	T	C	T	0.2068	0.0014	0.7913	0.8015	0.0349894	0.0026	3.41357e-09	0.5943	24589	7307	0.00141864	34.9295
749	rs4642211	IPF	M01493.metal.pos.txt.gz	C	T	C	T	-0.1422	-0.0017	0.3539	0.3576	0.0285606	0.0024	6.39523e-07	0.4903	24589	7307	0.00100713	24.7873
750	rs6560861	IPF	M01493.metal.pos.txt.gz	G	A	G	A	0.1636	-0.0017	0.1928	0.1831	0.0346732	0.0026	2.3778e-06	0.5232	24589	7307	0.000904574	22.2609
751	rs6786378	IPF	M01493.metal.pos.txt.gz	C	A	C	A	-0.1786	0.0013	0.159	0.1468	0.0384673	0.0033	3.43537e-06	0.6926	24589	7307	0.000875909	21.5549
752	rs7100920	IPF	M01493.metal.pos.txt.gz	C	T	C	T	-0.1744	0.0008	0.4612	0.5082	0.0272959	0.0024	1.66726e-10	0.7304	24589	7307	0.00165743	40.8189
753	rs7138541	IPF	M01493.metal.pos.txt.gz	G	A	G	A	-0.1298	0.0034	0.3986	0.4105	0.0280337	0.0024	3.65408e-06	0.1524	24589	7307	0.000871104	21.4365
754	rs751709	IPF	M01493.metal.pos.txt.gz	G	T	G	T	0.4781	0.0128	0.9761	0.9813	0.100858	0.0213	2.13372e-06	0.5484	24589	1766	0.000913018	22.4689
755	rs757918	IPF	M01493.metal.pos.txt.gz	C	T	C	T	0.1254	0.001	0.4503	0.4984	0.0272959	0.0024	4.34644e-06	0.67	24589	7307	0.000857601	21.1039
756	rs9860874	IPF	M01493.metal.pos.txt.gz	C	A	C	A	-0.2572	0.0021	0.7356	0.7467	0.0298253	0.0025	6.49092e-18	0.3926	24589	7307	0.00301523	74.3596
757	rs10967305	IPF	M01494.metal.pos.txt.gz	C	T	C	T	-0.1437	0.0035	0.4135	0.4089	0.0276121	0.0015	1.94795e-07	0.02041	24589	7354	0.00110026	27.0819
758	rs11073517	IPF	M01494.metal.pos.txt.gz	C	T	C	T	-0.175	0.0018	0.7296	0.68	0.0288768	0.0016	1.35927e-09	0.2636	24589	7354	0.00149138	36.7234
759	rs1123573	IPF	M01494.metal.pos.txt.gz	G	A	G	A	-0.1327	0.0005	0.3867	0.3923	0.0282445	0.0015	2.62378e-06	0.7362	24589	7354	0.000896902	22.0719
760	rs11788059	IPF	M01494.metal.pos.txt.gz	C	T	C	T	0.1547	-0.0001	0.3648	0.3241	0.0283498	0.0016	4.84737e-08	0.9554	24589	7354	0.00120952	29.7745
761	rs1214759	IPF	M01494.metal.pos.txt.gz	G	A	G	A	0.1652	0.0001	0.6292	0.6689	0.0292984	0.0015	1.71495e-08	0.957	24589	7354	0.00129131	31.7906
762	rs12610495	IPF	M01494.metal.pos.txt.gz	G	A	G	A	0.2495	0.001	0.2942	0.292	0.0304576	0.003	2.57551e-16	0.7389	23506	5592	0.00284664	67.0983
763	rs12753958	IPF	M01494.metal.pos.txt.gz	G	T	G	T	-0.1753	-0.0053	0.8151	0.8336	0.0349894	0.0024	5.44049e-07	0.02957	24589	7354	0.00101978	25.099
764	rs2076295	IPF	M01494.metal.pos.txt.gz	G	T	G	T	0.3966	0.0003	0.4145	0.4487	0.0270852	0.0016	1.49989e-48	0.8505	24589	7354	0.00864432	214.391
765	rs2197025	IPF	M01494.metal.pos.txt.gz	G	A	G	A	-0.144	-0.0034	0.4483	0.4881	0.0276121	0.0019	1.83716e-07	0.07514	24589	7354	0.00110485	27.1951
766	rs2609259	IPF	M01494.metal.pos.txt.gz	C	A	C	A	-0.2642	0	0.7654	0.782	0.0316169	0.002	6.4725e-17	0.9948	24589	7354	0.00283174	69.8218
767	rs2967465	IPF	M01494.metal.pos.txt.gz	G	A	G	A	-0.2037	-0.0027	0.1113	0.1275	0.0407858	0.0023	5.90247e-07	0.2497	24589	7354	0.0010134	24.9418
768	rs3808803	IPF	M01494.metal.pos.txt.gz	C	T	C	T	-0.1278	0.0024	0.5358	0.5499	0.0272959	0.0015	2.8407e-06	0.1085	24589	7354	0.000890712	21.9195
769	rs4233306	IPF	M01494.metal.pos.txt.gz	C	T	C	T	0.2068	0.0009	0.7913	0.8018	0.0349894	0.0021	3.41357e-09	0.6744	24589	7354	0.00141864	34.9295
770	rs4642211	IPF	M01494.metal.pos.txt.gz	C	T	C	T	-0.1422	-0.0013	0.3539	0.355	0.0285606	0.0016	6.39523e-07	0.4076	24589	7354	0.00100713	24.7873
771	rs6560861	IPF	M01494.metal.pos.txt.gz	G	A	G	A	0.1636	0.0014	0.1928	0.183	0.0346732	0.0022	2.3778e-06	0.5165	24589	7354	0.000904574	22.2609
772	rs6786378	IPF	M01494.metal.pos.txt.gz	C	A	C	A	-0.1786	-0.0013	0.159	0.1464	0.0384673	0.0022	3.43537e-06	0.5493	24589	7354	0.000875909	21.5549
773	rs7100920	IPF	M01494.metal.pos.txt.gz	C	T	C	T	-0.1744	0.0031	0.4612	0.5098	0.0272959	0.0015	1.66726e-10	0.04351	24589	7354	0.00165743	40.8189
774	rs7138541	IPF	M01494.metal.pos.txt.gz	G	A	G	A	-0.1298	0.0014	0.3986	0.4134	0.0280337	0.0015	3.65408e-06	0.3524	24589	7354	0.000871104	21.4365
775	rs751709	IPF	M01494.metal.pos.txt.gz	G	T	G	T	0.4781	0.0053	0.9761	0.9813	0.100858	0.0124	2.13372e-06	0.6727	24589	1762	0.000913018	22.4689
776	rs757918	IPF	M01494.metal.pos.txt.gz	C	T	C	T	0.1254	-0.0005	0.4503	0.4975	0.0272959	0.0015	4.34644e-06	0.7586	24589	7354	0.000857601	21.1039
777	rs9860874	IPF	M01494.metal.pos.txt.gz	C	A	C	A	-0.2572	0.0038	0.7356	0.7452	0.0298253	0.002	6.49092e-18	0.054	24589	7354	0.00301523	74.3596
778	rs10967305	IPF	M01508.metal.pos.txt.gz	C	T	C	T	-0.1437	-0.0014	0.4135	0.4081	0.0276121	0.0026	1.94795e-07	0.5977	24589	7160	0.00110026	27.0819
779	rs11073517	IPF	M01508.metal.pos.txt.gz	C	T	C	T	-0.175	0.0082	0.7296	0.6747	0.0288768	0.0026	1.35927e-09	0.001949	24589	7160	0.00149138	36.7234
780	rs1123573	IPF	M01508.metal.pos.txt.gz	G	A	G	A	-0.1327	-0.0047	0.3867	0.3891	0.0282445	0.0026	2.62378e-06	0.0738	24589	7160	0.000896902	22.0719
781	rs11788059	IPF	M01508.metal.pos.txt.gz	C	T	C	T	0.1547	-0.0078	0.3648	0.3253	0.0283498	0.0026	4.84737e-08	0.00295	24589	7160	0.00120952	29.7745
782	rs1214759	IPF	M01508.metal.pos.txt.gz	G	A	G	A	0.1652	-0.0033	0.6292	0.6728	0.0292984	0.0026	1.71495e-08	0.1992	24589	7160	0.00129131	31.7906
783	rs12610495	IPF	M01508.metal.pos.txt.gz	G	A	G	A	0.2495	-0.011	0.2942	0.292	0.0304576	0.004	2.57551e-16	0.00596	23506	5510	0.00284664	67.0983
784	rs12753958	IPF	M01508.metal.pos.txt.gz	G	T	G	T	-0.1753	-0.0016	0.8151	0.8534	0.0349894	0.004	5.44049e-07	0.6791	24589	7160	0.00101978	25.099
785	rs2076295	IPF	M01508.metal.pos.txt.gz	G	T	G	T	0.3966	0.0012	0.4145	0.4459	0.0270852	0.0026	1.49989e-48	0.6488	24589	7160	0.00864432	214.391
786	rs2197025	IPF	M01508.metal.pos.txt.gz	G	A	G	A	-0.144	0.003	0.4483	0.489	0.0276121	0.0032	1.83716e-07	0.351	24589	7160	0.00110485	27.1951
787	rs2609259	IPF	M01508.metal.pos.txt.gz	C	A	C	A	-0.2642	-0.0055	0.7654	0.783	0.0316169	0.0033	6.4725e-17	0.09826	24589	7160	0.00283174	69.8218
788	rs2967465	IPF	M01508.metal.pos.txt.gz	G	A	G	A	-0.2037	-0.0021	0.1113	0.13	0.0407858	0.0043	5.90247e-07	0.6152	24589	7160	0.0010134	24.9418
789	rs3808803	IPF	M01508.metal.pos.txt.gz	C	T	C	T	-0.1278	0.001	0.5358	0.5523	0.0272959	0.0026	2.8407e-06	0.6919	24589	7160	0.000890712	21.9195
790	rs4233306	IPF	M01508.metal.pos.txt.gz	C	T	C	T	0.2068	0.0015	0.7913	0.8023	0.0349894	0.0034	3.41357e-09	0.6608	24589	7160	0.00141864	34.9295
791	rs4642211	IPF	M01508.metal.pos.txt.gz	C	T	C	T	-0.1422	0.0013	0.3539	0.3609	0.0285606	0.0026	6.39523e-07	0.623	24589	7160	0.00100713	24.7873
792	rs6560861	IPF	M01508.metal.pos.txt.gz	G	A	G	A	0.1636	0.0056	0.1928	0.1825	0.0346732	0.0035	2.3778e-06	0.1059	24589	7160	0.000904574	22.2609
793	rs6786378	IPF	M01508.metal.pos.txt.gz	C	A	C	A	-0.1786	0.0027	0.159	0.147	0.0384673	0.0041	3.43537e-06	0.5074	24589	7160	0.000875909	21.5549
794	rs7100920	IPF	M01508.metal.pos.txt.gz	C	T	C	T	-0.1744	-0.0014	0.4612	0.5068	0.0272959	0.0026	1.66726e-10	0.6006	24589	7160	0.00165743	40.8189
795	rs7138541	IPF	M01508.metal.pos.txt.gz	G	A	G	A	-0.1298	-0.0036	0.3986	0.4055	0.0280337	0.0026	3.65408e-06	0.1648	24589	7160	0.000871104	21.4365
796	rs751709	IPF	M01508.metal.pos.txt.gz	G	T	G	T	0.4781	0.0096	0.9761	0.9811	0.100858	0.0267	2.13372e-06	0.7181	24589	1650	0.000913018	22.4689
797	rs757918	IPF	M01508.metal.pos.txt.gz	C	T	C	T	0.1254	0.0055	0.4503	0.4992	0.0272959	0.0026	4.34644e-06	0.0347	24589	7160	0.000857601	21.1039
798	rs9860874	IPF	M01508.metal.pos.txt.gz	C	A	C	A	-0.2572	-0.0009	0.7356	0.7464	0.0298253	0.0033	6.49092e-18	0.7802	24589	7160	0.00301523	74.3596
799	rs10967305	IPF	M01515.metal.pos.txt.gz	C	T	C	T	-0.1437	-0.0033	0.4135	0.4074	0.0276121	0.0165	1.94795e-07	0.8439	24589	2285	0.00110026	27.0819
800	rs11073517	IPF	M01515.metal.pos.txt.gz	C	T	C	T	-0.175	-0.0186	0.7296	0.6711	0.0288768	0.0175	1.35927e-09	0.2881	24589	2285	0.00149138	36.7234
801	rs1123573	IPF	M01515.metal.pos.txt.gz	G	A	G	A	-0.1327	0.024	0.3867	0.3872	0.0282445	0.0159	2.62378e-06	0.1306	24589	2285	0.000896902	22.0719
802	rs11788059	IPF	M01515.metal.pos.txt.gz	C	T	C	T	0.1547	0.0024	0.3648	0.3239	0.0283498	0.0168	4.84737e-08	0.8879	24589	2285	0.00120952	29.7745
803	rs1214759	IPF	M01515.metal.pos.txt.gz	G	A	G	A	0.1652	0.023	0.6292	0.6777	0.0292984	0.0167	1.71495e-08	0.1691	24589	2285	0.00129131	31.7906
804	rs12610495	IPF	M01515.metal.pos.txt.gz	G	A	G	A	0.2495	-0.031	0.2942	0.292	0.0304576	0.023	2.57551e-16	0.1777	23506	1803	0.00284664	67.0983
805	rs12753958	IPF	M01515.metal.pos.txt.gz	G	T	G	T	-0.1753	-0.0459	0.8151	0.8661	0.0349894	0.0265	5.44049e-07	0.08351	24589	2285	0.00101978	25.099
806	rs2076295	IPF	M01515.metal.pos.txt.gz	G	T	G	T	0.3966	-0.001	0.4145	0.4446	0.0270852	0.0167	1.49989e-48	0.9501	24589	2285	0.00864432	214.391
807	rs2197025	IPF	M01515.metal.pos.txt.gz	G	A	G	A	-0.144	0.0341	0.4483	0.494	0.0276121	0.0199	1.83716e-07	0.08666	24589	2285	0.00110485	27.1951
808	rs2609259	IPF	M01515.metal.pos.txt.gz	C	A	C	A	-0.2642	-0.0288	0.7654	0.7823	0.0316169	0.0193	6.4725e-17	0.1355	24589	2285	0.00283174	69.8218
809	rs2967465	IPF	M01515.metal.pos.txt.gz	G	A	G	A	-0.2037	-0.0016	0.1113	0.1319	0.0407858	0.0237	5.90247e-07	0.9468	24589	2285	0.0010134	24.9418
810	rs3808803	IPF	M01515.metal.pos.txt.gz	C	T	C	T	-0.1278	0.0201	0.5358	0.5513	0.0272959	0.0157	2.8407e-06	0.2004	24589	2285	0.000890712	21.9195
811	rs4233306	IPF	M01515.metal.pos.txt.gz	C	T	C	T	0.2068	0.0356	0.7913	0.8007	0.0349894	0.0204	3.41357e-09	0.08161	24589	2285	0.00141864	34.9295
812	rs4642211	IPF	M01515.metal.pos.txt.gz	C	T	C	T	-0.1422	-0.0198	0.3539	0.3659	0.0285606	0.0167	6.39523e-07	0.2351	24589	2285	0.00100713	24.7873
813	rs6560861	IPF	M01515.metal.pos.txt.gz	G	A	G	A	0.1636	0.0319	0.1928	0.1842	0.0346732	0.0213	2.3778e-06	0.1352	24589	2285	0.000904574	22.2609
814	rs6786378	IPF	M01515.metal.pos.txt.gz	C	A	C	A	-0.1786	-0.0321	0.159	0.1471	0.0384673	0.0239	3.43537e-06	0.1802	24589	2285	0.000875909	21.5549
815	rs7100920	IPF	M01515.metal.pos.txt.gz	C	T	C	T	-0.1744	0.0025	0.4612	0.5042	0.0272959	0.0166	1.66726e-10	0.8814	24589	2285	0.00165743	40.8189
816	rs7138541	IPF	M01515.metal.pos.txt.gz	G	A	G	A	-0.1298	-0.0232	0.3986	0.3987	0.0280337	0.0166	3.65408e-06	0.1633	24589	2285	0.000871104	21.4365
817	rs751709	IPF	M01515.metal.pos.txt.gz	G	T	G	T	0.4781	0.3035	0.9761	0.9871	0.100858	0.2823	2.13372e-06	0.2824	24589	482	0.000913018	22.4689
818	rs757918	IPF	M01515.metal.pos.txt.gz	C	T	C	T	0.1254	0.01	0.4503	0.5015	0.0272959	0.0166	4.34644e-06	0.5472	24589	2285	0.000857601	21.1039
819	rs9860874	IPF	M01515.metal.pos.txt.gz	C	A	C	A	-0.2572	-0.0022	0.7356	0.7501	0.0298253	0.0185	6.49092e-18	0.9054	24589	2285	0.00301523	74.3596
820	rs10967305	IPF	M01558.metal.pos.txt.gz	C	T	C	T	-0.1437	-0.0038	0.4135	0.4074	0.0276121	0.0017	1.94795e-07	0.02976	24589	6523	0.00110026	27.0819
821	rs11073517	IPF	M01558.metal.pos.txt.gz	C	T	C	T	-0.175	-0.0025	0.7296	0.6741	0.0288768	0.0018	1.35927e-09	0.1628	24589	6523	0.00149138	36.7234
822	rs1123573	IPF	M01558.metal.pos.txt.gz	G	A	G	A	-0.1327	-0.0019	0.3867	0.39	0.0282445	0.0018	2.62378e-06	0.2717	24589	6523	0.000896902	22.0719
823	rs11788059	IPF	M01558.metal.pos.txt.gz	C	T	C	T	0.1547	-0.0013	0.3648	0.3261	0.0283498	0.0018	4.84737e-08	0.4565	24589	6523	0.00120952	29.7745
824	rs1214759	IPF	M01558.metal.pos.txt.gz	G	A	G	A	0.1652	0.0043	0.6292	0.6744	0.0292984	0.0018	1.71495e-08	0.01492	24589	6523	0.00129131	31.7906
825	rs12610495	IPF	M01558.metal.pos.txt.gz	G	A	G	A	0.2495	-0.002	0.2942	0.292	0.0304576	0.003	2.57551e-16	0.505	23506	4915	0.00284664	67.0983
826	rs12753958	IPF	M01558.metal.pos.txt.gz	G	T	G	T	-0.1753	0.0027	0.8151	0.8494	0.0349894	0.0031	5.44049e-07	0.3752	24589	6523	0.00101978	25.099
827	rs2076295	IPF	M01558.metal.pos.txt.gz	G	T	G	T	0.3966	-0.0016	0.4145	0.4461	0.0270852	0.0018	1.49989e-48	0.3593	24589	6523	0.00864432	214.391
828	rs2197025	IPF	M01558.metal.pos.txt.gz	G	A	G	A	-0.144	0.0017	0.4483	0.4878	0.0276121	0.0024	1.83716e-07	0.4632	24589	6523	0.00110485	27.1951
829	rs2609259	IPF	M01558.metal.pos.txt.gz	C	A	C	A	-0.2642	-0.0016	0.7654	0.7836	0.0316169	0.0025	6.4725e-17	0.5215	24589	6523	0.00283174	69.8218
830	rs2967465	IPF	M01558.metal.pos.txt.gz	G	A	G	A	-0.2037	-0.0035	0.1113	0.1321	0.0407858	0.0027	5.90247e-07	0.1852	24589	6523	0.0010134	24.9418
831	rs3808803	IPF	M01558.metal.pos.txt.gz	C	T	C	T	-0.1278	-0.0002	0.5358	0.5513	0.0272959	0.0018	2.8407e-06	0.9022	24589	6523	0.000890712	21.9195
832	rs4233306	IPF	M01558.metal.pos.txt.gz	C	T	C	T	0.2068	0.0021	0.7913	0.8025	0.0349894	0.0025	3.41357e-09	0.4141	24589	6523	0.00141864	34.9295
833	rs4642211	IPF	M01558.metal.pos.txt.gz	C	T	C	T	-0.1422	-0.0009	0.3539	0.3631	0.0285606	0.0018	6.39523e-07	0.6113	24589	6523	0.00100713	24.7873
834	rs6560861	IPF	M01558.metal.pos.txt.gz	G	A	G	A	0.1636	0.0033	0.1928	0.1825	0.0346732	0.0026	2.3778e-06	0.1964	24589	6523	0.000904574	22.2609
835	rs6786378	IPF	M01558.metal.pos.txt.gz	C	A	C	A	-0.1786	-0.0035	0.159	0.1471	0.0384673	0.0026	3.43537e-06	0.1818	24589	6523	0.000875909	21.5549
836	rs7100920	IPF	M01558.metal.pos.txt.gz	C	T	C	T	-0.1744	-0.0004	0.4612	0.5061	0.0272959	0.0018	1.66726e-10	0.818	24589	6523	0.00165743	40.8189
837	rs7138541	IPF	M01558.metal.pos.txt.gz	G	A	G	A	-0.1298	0.0007	0.3986	0.4034	0.0280337	0.0018	3.65408e-06	0.6747	24589	6523	0.000871104	21.4365
838	rs751709	IPF	M01558.metal.pos.txt.gz	G	T	G	T	0.4781	0.0001	0.9761	0.9807	0.100858	0.0191	2.13372e-06	0.9964	24589	1608	0.000913018	22.4689
839	rs757918	IPF	M01558.metal.pos.txt.gz	C	T	C	T	0.1254	0.0023	0.4503	0.5004	0.0272959	0.0018	4.34644e-06	0.1942	24589	6523	0.000857601	21.1039
840	rs9860874	IPF	M01558.metal.pos.txt.gz	C	A	C	A	-0.2572	-0.0003	0.7356	0.7467	0.0298253	0.0024	6.49092e-18	0.9052	24589	6523	0.00301523	74.3596
841	rs10967305	IPF	M01561.metal.pos.txt.gz	C	T	C	T	-0.1437	-0.0053	0.4135	0.4093	0.0276121	0.003	1.94795e-07	0.0746	24589	7276	0.00110026	27.0819
842	rs11073517	IPF	M01561.metal.pos.txt.gz	C	T	C	T	-0.175	0.0041	0.7296	0.6823	0.0288768	0.0031	1.35927e-09	0.1852	24589	7276	0.00149138	36.7234
843	rs1123573	IPF	M01561.metal.pos.txt.gz	G	A	G	A	-0.1327	0.0005	0.3867	0.393	0.0282445	0.003	2.62378e-06	0.8736	24589	7276	0.000896902	22.0719
844	rs11788059	IPF	M01561.metal.pos.txt.gz	C	T	C	T	0.1547	0.0031	0.3648	0.3232	0.0283498	0.0031	4.84737e-08	0.3086	24589	7276	0.00120952	29.7745
845	rs1214759	IPF	M01561.metal.pos.txt.gz	G	A	G	A	0.1652	-0.0005	0.6292	0.6669	0.0292984	0.0031	1.71495e-08	0.8811	24589	7276	0.00129131	31.7906
846	rs12610495	IPF	M01561.metal.pos.txt.gz	G	A	G	A	0.2495	-0.011	0.2942	0.292	0.0304576	0.0053	2.57551e-16	0.03776	23506	5517	0.00284664	67.0983
847	rs12753958	IPF	M01561.metal.pos.txt.gz	G	T	G	T	-0.1753	-0.005	0.8151	0.8328	0.0349894	0.0045	5.44049e-07	0.2627	24589	7276	0.00101978	25.099
848	rs2076295	IPF	M01561.metal.pos.txt.gz	G	T	G	T	0.3966	0.0001	0.4145	0.4496	0.0270852	0.0031	1.49989e-48	0.9789	24589	7276	0.00864432	214.391
849	rs2197025	IPF	M01561.metal.pos.txt.gz	G	A	G	A	-0.144	-0.0063	0.4483	0.4878	0.0276121	0.0035	1.83716e-07	0.06617	24589	7276	0.00110485	27.1951
850	rs2609259	IPF	M01561.metal.pos.txt.gz	C	A	C	A	-0.2642	0.0057	0.7654	0.7819	0.0316169	0.0037	6.4725e-17	0.119	24589	7276	0.00283174	69.8218
851	rs2967465	IPF	M01561.metal.pos.txt.gz	G	A	G	A	-0.2037	-0.0079	0.1113	0.1259	0.0407858	0.0046	5.90247e-07	0.08908	24589	7276	0.0010134	24.9418
852	rs3808803	IPF	M01561.metal.pos.txt.gz	C	T	C	T	-0.1278	-0.0027	0.5358	0.5495	0.0272959	0.003	2.8407e-06	0.3738	24589	7276	0.000890712	21.9195
853	rs4233306	IPF	M01561.metal.pos.txt.gz	C	T	C	T	0.2068	0.0033	0.7913	0.8018	0.0349894	0.0038	3.41357e-09	0.3897	24589	7276	0.00141864	34.9295
854	rs4642211	IPF	M01561.metal.pos.txt.gz	C	T	C	T	-0.1422	0.0044	0.3539	0.3518	0.0285606	0.0031	6.39523e-07	0.1537	24589	7276	0.00100713	24.7873
855	rs6560861	IPF	M01561.metal.pos.txt.gz	G	A	G	A	0.1636	-0.0006	0.1928	0.1834	0.0346732	0.0039	2.3778e-06	0.8751	24589	7276	0.000904574	22.2609
856	rs6786378	IPF	M01561.metal.pos.txt.gz	C	A	C	A	-0.1786	0.0056	0.159	0.1461	0.0384673	0.0044	3.43537e-06	0.2043	24589	7276	0.000875909	21.5549
857	rs7100920	IPF	M01561.metal.pos.txt.gz	C	T	C	T	-0.1744	0.0029	0.4612	0.5107	0.0272959	0.003	1.66726e-10	0.3439	24589	7276	0.00165743	40.8189
858	rs7138541	IPF	M01561.metal.pos.txt.gz	G	A	G	A	-0.1298	-0.0036	0.3986	0.4174	0.0280337	0.003	3.65408e-06	0.2323	24589	7276	0.000871104	21.4365
859	rs751709	IPF	M01561.metal.pos.txt.gz	G	T	G	T	0.4781	0.0082	0.9761	0.9813	0.100858	0.0227	2.13372e-06	0.7172	24589	1759	0.000913018	22.4689
860	rs757918	IPF	M01561.metal.pos.txt.gz	C	T	C	T	0.1254	-0.0012	0.4503	0.4973	0.0272959	0.003	4.34644e-06	0.7041	24589	7276	0.000857601	21.1039
861	rs9860874	IPF	M01561.metal.pos.txt.gz	C	A	C	A	-0.2572	0.0013	0.7356	0.7452	0.0298253	0.0036	6.49092e-18	0.7176	24589	7276	0.00301523	74.3596
862	rs10967305	IPF	M01564.metal.pos.txt.gz	C	T	C	T	-0.1437	0	0.4135	0.4081	0.0276121	0.0018	1.94795e-07	0.9859	24589	7364	0.00110026	27.0819
863	rs11073517	IPF	M01564.metal.pos.txt.gz	C	T	C	T	-0.175	-0.0016	0.7296	0.6727	0.0288768	0.0018	1.35927e-09	0.3668	24589	7364	0.00149138	36.7234
864	rs1123573	IPF	M01564.metal.pos.txt.gz	G	A	G	A	-0.1327	0.0007	0.3867	0.3895	0.0282445	0.0018	2.62378e-06	0.7038	24589	7364	0.000896902	22.0719
865	rs11788059	IPF	M01564.metal.pos.txt.gz	C	T	C	T	0.1547	-0.001	0.3648	0.326	0.0283498	0.0018	4.84737e-08	0.5642	24589	7364	0.00120952	29.7745
866	rs1214759	IPF	M01564.metal.pos.txt.gz	G	A	G	A	0.1652	0.0012	0.6292	0.6746	0.0292984	0.0018	1.71495e-08	0.4919	24589	7364	0.00129131	31.7906
867	rs12610495	IPF	M01564.metal.pos.txt.gz	G	A	G	A	0.2495	-0.001	0.2942	0.292	0.0304576	0.003	2.57551e-16	0.7389	23506	5603	0.00284664	67.0983
868	rs12753958	IPF	M01564.metal.pos.txt.gz	G	T	G	T	-0.1753	0.0043	0.8151	0.852	0.0349894	0.0031	5.44049e-07	0.1727	24589	7364	0.00101978	25.099
869	rs2076295	IPF	M01564.metal.pos.txt.gz	G	T	G	T	0.3966	-0.0038	0.4145	0.4452	0.0270852	0.0018	1.49989e-48	0.0327	24589	7364	0.00864432	214.391
870	rs2197025	IPF	M01564.metal.pos.txt.gz	G	A	G	A	-0.144	0.0002	0.4483	0.4882	0.0276121	0.0024	1.83716e-07	0.9481	24589	7364	0.00110485	27.1951
871	rs2609259	IPF	M01564.metal.pos.txt.gz	C	A	C	A	-0.2642	-0.0023	0.7654	0.7827	0.0316169	0.0025	6.4725e-17	0.3617	24589	7364	0.00283174	69.8218
872	rs2967465	IPF	M01564.metal.pos.txt.gz	G	A	G	A	-0.2037	-0.0027	0.1113	0.1319	0.0407858	0.0027	5.90247e-07	0.3169	24589	7364	0.0010134	24.9418
873	rs3808803	IPF	M01564.metal.pos.txt.gz	C	T	C	T	-0.1278	0.0009	0.5358	0.5525	0.0272959	0.0018	2.8407e-06	0.6156	24589	7364	0.000890712	21.9195
874	rs4233306	IPF	M01564.metal.pos.txt.gz	C	T	C	T	0.2068	0.0023	0.7913	0.8015	0.0349894	0.0026	3.41357e-09	0.3749	24589	7364	0.00141864	34.9295
875	rs4642211	IPF	M01564.metal.pos.txt.gz	C	T	C	T	-0.1422	-0.001	0.3539	0.3637	0.0285606	0.0018	6.39523e-07	0.5859	24589	7364	0.00100713	24.7873
876	rs6560861	IPF	M01564.metal.pos.txt.gz	G	A	G	A	0.1636	0.0035	0.1928	0.1831	0.0346732	0.0026	2.3778e-06	0.177	24589	7364	0.000904574	22.2609
877	rs6786378	IPF	M01564.metal.pos.txt.gz	C	A	C	A	-0.1786	-0.0003	0.159	0.1472	0.0384673	0.0026	3.43537e-06	0.9034	24589	7364	0.000875909	21.5549
878	rs7100920	IPF	M01564.metal.pos.txt.gz	C	T	C	T	-0.1744	0.0036	0.4612	0.5061	0.0272959	0.0018	1.66726e-10	0.04279	24589	7364	0.00165743	40.8189
879	rs7138541	IPF	M01564.metal.pos.txt.gz	G	A	G	A	-0.1298	-0.0016	0.3986	0.4028	0.0280337	0.0018	3.65408e-06	0.367	24589	7364	0.000871104	21.4365
880	rs751709	IPF	M01564.metal.pos.txt.gz	G	T	G	T	0.4781	-0.022	0.9761	0.9813	0.100858	0.0206	2.13372e-06	0.2847	24589	1761	0.000913018	22.4689
881	rs757918	IPF	M01564.metal.pos.txt.gz	C	T	C	T	0.1254	-0.0006	0.4503	0.5	0.0272959	0.0018	4.34644e-06	0.7355	24589	7364	0.000857601	21.1039
882	rs9860874	IPF	M01564.metal.pos.txt.gz	C	A	C	A	-0.2572	0.0027	0.7356	0.7466	0.0298253	0.0025	6.49092e-18	0.2682	24589	7364	0.00301523	74.3596
883	rs10967305	IPF	M01572.metal.pos.txt.gz	C	T	C	T	-0.1437	0.0009	0.4135	0.4084	0.0276121	0.0023	1.94795e-07	0.7067	24589	7333	0.00110026	27.0819
884	rs11073517	IPF	M01572.metal.pos.txt.gz	C	T	C	T	-0.175	0.0063	0.7296	0.6787	0.0288768	0.0024	1.35927e-09	0.009457	24589	7333	0.00149138	36.7234
885	rs1123573	IPF	M01572.metal.pos.txt.gz	G	A	G	A	-0.1327	0.002	0.3867	0.3913	0.0282445	0.0024	2.62378e-06	0.4063	24589	7333	0.000896902	22.0719
886	rs11788059	IPF	M01572.metal.pos.txt.gz	C	T	C	T	0.1547	-0.0019	0.3648	0.3244	0.0283498	0.0024	4.84737e-08	0.4251	24589	7333	0.00120952	29.7745
887	rs1214759	IPF	M01572.metal.pos.txt.gz	G	A	G	A	0.1652	0	0.6292	0.6702	0.0292984	0.0024	1.71495e-08	0.9915	24589	7333	0.00129131	31.7906
888	rs12610495	IPF	M01572.metal.pos.txt.gz	G	A	G	A	0.2495	-0.002	0.2942	0.292	0.0304576	0.004	2.57551e-16	0.6171	23506	5585	0.00284664	67.0983
889	rs12753958	IPF	M01572.metal.pos.txt.gz	G	T	G	T	-0.1753	0.005	0.8151	0.8439	0.0349894	0.0035	5.44049e-07	0.1555	24589	7333	0.00101978	25.099
890	rs2076295	IPF	M01572.metal.pos.txt.gz	G	T	G	T	0.3966	0.0012	0.4145	0.4479	0.0270852	0.0024	1.49989e-48	0.6317	24589	7333	0.00864432	214.391
891	rs2197025	IPF	M01572.metal.pos.txt.gz	G	A	G	A	-0.144	-0.0005	0.4483	0.4878	0.0276121	0.0024	1.83716e-07	0.8512	24589	7333	0.00110485	27.1951
892	rs2609259	IPF	M01572.metal.pos.txt.gz	C	A	C	A	-0.2642	0.0032	0.7654	0.783	0.0316169	0.0025	6.4725e-17	0.202	24589	7333	0.00283174	69.8218
893	rs2967465	IPF	M01572.metal.pos.txt.gz	G	A	G	A	-0.2037	0.0011	0.1113	0.1295	0.0407858	0.0033	5.90247e-07	0.7498	24589	7333	0.0010134	24.9418
894	rs3808803	IPF	M01572.metal.pos.txt.gz	C	T	C	T	-0.1278	0.0033	0.5358	0.5508	0.0272959	0.0024	2.8407e-06	0.1608	24589	7333	0.000890712	21.9195
895	rs4233306	IPF	M01572.metal.pos.txt.gz	C	T	C	T	0.2068	0.0001	0.7913	0.8018	0.0349894	0.0031	3.41357e-09	0.9765	24589	7333	0.00141864	34.9295
896	rs4642211	IPF	M01572.metal.pos.txt.gz	C	T	C	T	-0.1422	0.0028	0.3539	0.357	0.0285606	0.0024	6.39523e-07	0.2524	24589	7333	0.00100713	24.7873
897	rs6560861	IPF	M01572.metal.pos.txt.gz	G	A	G	A	0.1636	0.0043	0.1928	0.1834	0.0346732	0.0032	2.3778e-06	0.1732	24589	7333	0.000904574	22.2609
898	rs6786378	IPF	M01572.metal.pos.txt.gz	C	A	C	A	-0.1786	-0.0028	0.159	0.1467	0.0384673	0.0032	3.43537e-06	0.3871	24589	7333	0.000875909	21.5549
899	rs7100920	IPF	M01572.metal.pos.txt.gz	C	T	C	T	-0.1744	-0.001	0.4612	0.5087	0.0272959	0.0024	1.66726e-10	0.6833	24589	7333	0.00165743	40.8189
900	rs7138541	IPF	M01572.metal.pos.txt.gz	G	A	G	A	-0.1298	-0.0004	0.3986	0.4114	0.0280337	0.0024	3.65408e-06	0.8511	24589	7333	0.000871104	21.4365
901	rs751709	IPF	M01572.metal.pos.txt.gz	G	T	G	T	0.4781	0.0207	0.9761	0.9813	0.100858	0.0204	2.13372e-06	0.3099	24589	1748	0.000913018	22.4689
902	rs757918	IPF	M01572.metal.pos.txt.gz	C	T	C	T	0.1254	0.0022	0.4503	0.4983	0.0272959	0.0024	4.34644e-06	0.3546	24589	7333	0.000857601	21.1039
903	rs9860874	IPF	M01572.metal.pos.txt.gz	C	A	C	A	-0.2572	0.0011	0.7356	0.747	0.0298253	0.0025	6.49092e-18	0.6568	24589	7333	0.00301523	74.3596
904	rs10967305	IPF	M01573.metal.pos.txt.gz	C	T	C	T	-0.1437	-0.01	0.4135	0.4085	0.0276121	0.007	1.94795e-07	0.151	24589	2315	0.00110026	27.0819
905	rs11073517	IPF	M01573.metal.pos.txt.gz	C	T	C	T	-0.175	-0.0108	0.7296	0.6965	0.0288768	0.0076	1.35927e-09	0.1574	24589	2315	0.00149138	36.7234
906	rs1123573	IPF	M01573.metal.pos.txt.gz	G	A	G	A	-0.1327	-0.0004	0.3867	0.3955	0.0282445	0.0072	2.62378e-06	0.9509	24589	2315	0.000896902	22.0719
907	rs11788059	IPF	M01573.metal.pos.txt.gz	C	T	C	T	0.1547	0.0137	0.3648	0.3194	0.0283498	0.0075	4.84737e-08	0.06702	24589	2315	0.00120952	29.7745
908	rs1214759	IPF	M01573.metal.pos.txt.gz	G	A	G	A	0.1652	-0.0075	0.6292	0.6584	0.0292984	0.0074	1.71495e-08	0.3097	24589	2315	0.00129131	31.7906
909	rs12610495	IPF	M01573.metal.pos.txt.gz	G	A	G	A	0.2495	-0.003	0.2942	0.292	0.0304576	0.02	2.57551e-16	0.8808	23506	669	0.00284664	67.0983
910	rs12753958	IPF	M01573.metal.pos.txt.gz	G	T	G	T	-0.1753	0.0013	0.8151	0.8168	0.0349894	0.0097	5.44049e-07	0.8948	24589	2315	0.00101978	25.099
911	rs2076295	IPF	M01573.metal.pos.txt.gz	G	T	G	T	0.3966	0.0138	0.4145	0.4542	0.0270852	0.0073	1.49989e-48	0.05994	24589	2315	0.00864432	214.391
912	rs2197025	IPF	M01573.metal.pos.txt.gz	G	A	G	A	-0.144	-0.0028	0.4483	0.4879	0.0276121	0.0077	1.83716e-07	0.72	24589	2315	0.00110485	27.1951
913	rs2609259	IPF	M01573.metal.pos.txt.gz	C	A	C	A	-0.2642	-0.0014	0.7654	0.7819	0.0316169	0.0084	6.4725e-17	0.865	24589	2315	0.00283174	69.8218
914	rs2967465	IPF	M01573.metal.pos.txt.gz	G	A	G	A	-0.2037	-0.0077	0.1113	0.1212	0.0407858	0.011	5.90247e-07	0.4855	24589	2315	0.0010134	24.9418
915	rs3808803	IPF	M01573.metal.pos.txt.gz	C	T	C	T	-0.1278	-0.0032	0.5358	0.5446	0.0272959	0.0071	2.8407e-06	0.6558	24589	2315	0.000890712	21.9195
916	rs4233306	IPF	M01573.metal.pos.txt.gz	C	T	C	T	0.2068	0.0054	0.7913	0.8007	0.0349894	0.009	3.41357e-09	0.5481	24589	2315	0.00141864	34.9295
917	rs4642211	IPF	M01573.metal.pos.txt.gz	C	T	C	T	-0.1422	-0.0013	0.3539	0.3382	0.0285606	0.0074	6.39523e-07	0.8625	24589	2315	0.00100713	24.7873
918	rs6560861	IPF	M01573.metal.pos.txt.gz	G	A	G	A	0.1636	0.0186	0.1928	0.1828	0.0346732	0.0097	2.3778e-06	0.0556	24589	2315	0.000904574	22.2609
919	rs6786378	IPF	M01573.metal.pos.txt.gz	C	A	C	A	-0.1786	0.0142	0.159	0.1454	0.0384673	0.01	3.43537e-06	0.157	24589	2315	0.000875909	21.5549
920	rs7100920	IPF	M01573.metal.pos.txt.gz	C	T	C	T	-0.1744	0.0006	0.4612	0.5156	0.0272959	0.0072	1.66726e-10	0.939	24589	2315	0.00165743	40.8189
921	rs7138541	IPF	M01573.metal.pos.txt.gz	G	A	G	A	-0.1298	-0.0025	0.3986	0.4309	0.0280337	0.0072	3.65408e-06	0.7289	24589	2315	0.000871104	21.4365
922	rs751709	IPF	M01573.metal.pos.txt.gz	G	T	G	T	0.4781	0.0494	0.9761	0.9806	0.100858	0.0419	2.13372e-06	0.2379	24589	1646	0.000913018	22.4689
923	rs757918	IPF	M01573.metal.pos.txt.gz	C	T	C	T	0.1254	0.0029	0.4503	0.4924	0.0272959	0.0072	4.34644e-06	0.6827	24589	2315	0.000857601	21.1039
924	rs9860874	IPF	M01573.metal.pos.txt.gz	C	A	C	A	-0.2572	-0.0095	0.7356	0.7438	0.0298253	0.0079	6.49092e-18	0.2296	24589	2315	0.00301523	74.3596
925	rs10967305	IPF	M01585.metal.pos.txt.gz	C	T	C	T	-0.1437	-0.0008	0.4135	0.4084	0.0276121	0.0016	1.94795e-07	0.6131	24589	7271	0.00110026	27.0819
926	rs11073517	IPF	M01585.metal.pos.txt.gz	C	T	C	T	-0.175	-0.0033	0.7296	0.6781	0.0288768	0.0016	1.35927e-09	0.04201	24589	7271	0.00149138	36.7234
927	rs1123573	IPF	M01585.metal.pos.txt.gz	G	A	G	A	-0.1327	0.0001	0.3867	0.3922	0.0282445	0.0016	2.62378e-06	0.9691	24589	7271	0.000896902	22.0719
928	rs11788059	IPF	M01585.metal.pos.txt.gz	C	T	C	T	0.1547	-0.0011	0.3648	0.3258	0.0283498	0.0016	4.84737e-08	0.5097	24589	7271	0.00120952	29.7745
929	rs1214759	IPF	M01585.metal.pos.txt.gz	G	A	G	A	0.1652	0.0016	0.6292	0.6709	0.0292984	0.0016	1.71495e-08	0.3187	24589	7271	0.00129131	31.7906
930	rs12610495	IPF	M01585.metal.pos.txt.gz	G	A	G	A	0.2495	-0.003	0.2942	0.292	0.0304576	0.002	2.57551e-16	0.1336	23506	5574	0.00284664	67.0983
931	rs12753958	IPF	M01585.metal.pos.txt.gz	G	T	G	T	-0.1753	0.0002	0.8151	0.8483	0.0349894	0.0023	5.44049e-07	0.9211	24589	7271	0.00101978	25.099
932	rs2076295	IPF	M01585.metal.pos.txt.gz	G	T	G	T	0.3966	-0.0005	0.4145	0.4472	0.0270852	0.0016	1.49989e-48	0.7574	24589	7271	0.00864432	214.391
933	rs2197025	IPF	M01585.metal.pos.txt.gz	G	A	G	A	-0.144	0.0015	0.4483	0.4874	0.0276121	0.0016	1.83716e-07	0.365	24589	7271	0.00110485	27.1951
934	rs2609259	IPF	M01585.metal.pos.txt.gz	C	A	C	A	-0.2642	-0.0017	0.7654	0.7827	0.0316169	0.0017	6.4725e-17	0.3162	24589	7271	0.00283174	69.8218
935	rs2967465	IPF	M01585.metal.pos.txt.gz	G	A	G	A	-0.2037	0.0006	0.1113	0.1325	0.0407858	0.0018	5.90247e-07	0.7341	24589	7271	0.0010134	24.9418
936	rs3808803	IPF	M01585.metal.pos.txt.gz	C	T	C	T	-0.1278	-0.0009	0.5358	0.5509	0.0272959	0.0016	2.8407e-06	0.564	24589	7271	0.000890712	21.9195
937	rs4233306	IPF	M01585.metal.pos.txt.gz	C	T	C	T	0.2068	0.0023	0.7913	0.8012	0.0349894	0.0017	3.41357e-09	0.1836	24589	7271	0.00141864	34.9295
938	rs4642211	IPF	M01585.metal.pos.txt.gz	C	T	C	T	-0.1422	-0.0015	0.3539	0.3578	0.0285606	0.0016	6.39523e-07	0.3551	24589	7271	0.00100713	24.7873
939	rs6560861	IPF	M01585.metal.pos.txt.gz	G	A	G	A	0.1636	0.002	0.1928	0.1828	0.0346732	0.0018	2.3778e-06	0.248	24589	7271	0.000904574	22.2609
940	rs6786378	IPF	M01585.metal.pos.txt.gz	C	A	C	A	-0.1786	-0.0012	0.159	0.147	0.0384673	0.0018	3.43537e-06	0.4966	24589	7271	0.000875909	21.5549
941	rs7100920	IPF	M01585.metal.pos.txt.gz	C	T	C	T	-0.1744	0.0016	0.4612	0.5087	0.0272959	0.0016	1.66726e-10	0.3328	24589	7271	0.00165743	40.8189
942	rs7138541	IPF	M01585.metal.pos.txt.gz	G	A	G	A	-0.1298	0.0005	0.3986	0.4102	0.0280337	0.0016	3.65408e-06	0.7648	24589	7271	0.000871104	21.4365
943	rs751709	IPF	M01585.metal.pos.txt.gz	G	T	G	T	0.4781	-0.0116	0.9761	0.9808	0.100858	0.0139	2.13372e-06	0.4025	24589	1697	0.000913018	22.4689
944	rs757918	IPF	M01585.metal.pos.txt.gz	C	T	C	T	0.1254	0.0008	0.4503	0.4988	0.0272959	0.0016	4.34644e-06	0.6259	24589	7271	0.000857601	21.1039
945	rs9860874	IPF	M01585.metal.pos.txt.gz	C	A	C	A	-0.2572	0.0005	0.7356	0.7469	0.0298253	0.0017	6.49092e-18	0.7583	24589	7271	0.00301523	74.3596
946	rs10967305	IPF	M01604.metal.pos.txt.gz	C	T	C	T	-0.1437	-0.0001	0.4135	0.4084	0.0276121	0.0016	1.94795e-07	0.9405	24589	7371	0.00110026	27.0819
947	rs11073517	IPF	M01604.metal.pos.txt.gz	C	T	C	T	-0.175	-0.0008	0.7296	0.678	0.0288768	0.0016	1.35927e-09	0.6419	24589	7371	0.00149138	36.7234
948	rs1123573	IPF	M01604.metal.pos.txt.gz	G	A	G	A	-0.1327	-0.0006	0.3867	0.3912	0.0282445	0.0016	2.62378e-06	0.7293	24589	7371	0.000896902	22.0719
949	rs11788059	IPF	M01604.metal.pos.txt.gz	C	T	C	T	0.1547	-0.0006	0.3648	0.3243	0.0283498	0.0016	4.84737e-08	0.7248	24589	7371	0.00120952	29.7745
950	rs1214759	IPF	M01604.metal.pos.txt.gz	G	A	G	A	0.1652	-0.0013	0.6292	0.6707	0.0292984	0.0016	1.71495e-08	0.435	24589	7371	0.00129131	31.7906
951	rs12610495	IPF	M01604.metal.pos.txt.gz	G	A	G	A	0.2495	-0.001	0.2942	0.292	0.0304576	0.002	2.57551e-16	0.6171	23506	5604	0.00284664	67.0983
952	rs12753958	IPF	M01604.metal.pos.txt.gz	G	T	G	T	-0.1753	0.0002	0.8151	0.8487	0.0349894	0.0023	5.44049e-07	0.9222	24589	7371	0.00101978	25.099
953	rs2076295	IPF	M01604.metal.pos.txt.gz	G	T	G	T	0.3966	0.0005	0.4145	0.4478	0.0270852	0.0016	1.49989e-48	0.7527	24589	7371	0.00864432	214.391
954	rs2197025	IPF	M01604.metal.pos.txt.gz	G	A	G	A	-0.144	0.0013	0.4483	0.488	0.0276121	0.0016	1.83716e-07	0.4405	24589	7371	0.00110485	27.1951
955	rs2609259	IPF	M01604.metal.pos.txt.gz	C	A	C	A	-0.2642	-0.0018	0.7654	0.7828	0.0316169	0.0017	6.4725e-17	0.2931	24589	7371	0.00283174	69.8218
956	rs2967465	IPF	M01604.metal.pos.txt.gz	G	A	G	A	-0.2037	-0.0021	0.1113	0.1288	0.0407858	0.0024	5.90247e-07	0.3842	24589	7371	0.0010134	24.9418
957	rs3808803	IPF	M01604.metal.pos.txt.gz	C	T	C	T	-0.1278	-0.0035	0.5358	0.5503	0.0272959	0.0016	2.8407e-06	0.02822	24589	7371	0.000890712	21.9195
958	rs4233306	IPF	M01604.metal.pos.txt.gz	C	T	C	T	0.2068	-0.0006	0.7913	0.8015	0.0349894	0.0017	3.41357e-09	0.7204	24589	7371	0.00141864	34.9295
959	rs4642211	IPF	M01604.metal.pos.txt.gz	C	T	C	T	-0.1422	-0.0007	0.3539	0.3573	0.0285606	0.0016	6.39523e-07	0.6854	24589	7371	0.00100713	24.7873
960	rs6560861	IPF	M01604.metal.pos.txt.gz	G	A	G	A	0.1636	0.0026	0.1928	0.183	0.0346732	0.0018	2.3778e-06	0.1318	24589	7371	0.000904574	22.2609
961	rs6786378	IPF	M01604.metal.pos.txt.gz	C	A	C	A	-0.1786	-0.0051	0.159	0.1466	0.0384673	0.0023	3.43537e-06	0.02955	24589	7371	0.000875909	21.5549
962	rs7100920	IPF	M01604.metal.pos.txt.gz	C	T	C	T	-0.1744	0.0008	0.4612	0.5084	0.0272959	0.0016	1.66726e-10	0.6233	24589	7371	0.00165743	40.8189
963	rs7138541	IPF	M01604.metal.pos.txt.gz	G	A	G	A	-0.1298	0.0007	0.3986	0.4107	0.0280337	0.0016	3.65408e-06	0.6531	24589	7371	0.000871104	21.4365
964	rs751709	IPF	M01604.metal.pos.txt.gz	G	T	G	T	0.4781	-0.0026	0.9761	0.9813	0.100858	0.014	2.13372e-06	0.8506	24589	1767	0.000913018	22.4689
965	rs757918	IPF	M01604.metal.pos.txt.gz	C	T	C	T	0.1254	-0.0008	0.4503	0.4984	0.0272959	0.0016	4.34644e-06	0.6144	24589	7371	0.000857601	21.1039
966	rs9860874	IPF	M01604.metal.pos.txt.gz	C	A	C	A	-0.2572	-0.0001	0.7356	0.7467	0.0298253	0.0017	6.49092e-18	0.9603	24589	7371	0.00301523	74.3596
967	rs10967305	IPF	M01605.metal.pos.txt.gz	C	T	C	T	-0.1437	0.0031	0.4135	0.4084	0.0276121	0.0062	1.94795e-07	0.6129	24589	5162	0.00110026	27.0819
968	rs11073517	IPF	M01605.metal.pos.txt.gz	C	T	C	T	-0.175	-0.0105	0.7296	0.6754	0.0288768	0.007	1.35927e-09	0.1357	24589	5162	0.00149138	36.7234
969	rs1123573	IPF	M01605.metal.pos.txt.gz	G	A	G	A	-0.1327	-0.0163	0.3867	0.3923	0.0282445	0.0063	2.62378e-06	0.009862	24589	5162	0.000896902	22.0719
970	rs11788059	IPF	M01605.metal.pos.txt.gz	C	T	C	T	0.1547	-0.0108	0.3648	0.3242	0.0283498	0.0064	4.84737e-08	0.08844	24589	5162	0.00120952	29.7745
971	rs1214759	IPF	M01605.metal.pos.txt.gz	G	A	G	A	0.1652	-0.0171	0.6292	0.6666	0.0292984	0.0069	1.71495e-08	0.01376	24589	5162	0.00129131	31.7906
972	rs12610495	IPF	M01605.metal.pos.txt.gz	G	A	G	A	0.2495	-0.007	0.2942	0.292	0.0304576	0.0093	2.57551e-16	0.4536	23506	4207	0.00284664	67.0983
973	rs12753958	IPF	M01605.metal.pos.txt.gz	G	T	G	T	-0.1753	-0.008	0.8151	0.8545	0.0349894	0.01	5.44049e-07	0.421	24589	5162	0.00101978	25.099
974	rs2076295	IPF	M01605.metal.pos.txt.gz	G	T	G	T	0.3966	0.0057	0.4145	0.4481	0.0270852	0.0063	1.49989e-48	0.3667	24589	5162	0.00864432	214.391
975	rs2197025	IPF	M01605.metal.pos.txt.gz	G	A	G	A	-0.144	0.0017	0.4483	0.4878	0.0276121	0.0076	1.83716e-07	0.8246	24589	5162	0.00110485	27.1951
976	rs2609259	IPF	M01605.metal.pos.txt.gz	C	A	C	A	-0.2642	-0.0069	0.7654	0.785	0.0316169	0.0079	6.4725e-17	0.3779	24589	5162	0.00283174	69.8218
977	rs2967465	IPF	M01605.metal.pos.txt.gz	G	A	G	A	-0.2037	0.008	0.1113	0.1323	0.0407858	0.0091	5.90247e-07	0.383	24589	5162	0.0010134	24.9418
978	rs3808803	IPF	M01605.metal.pos.txt.gz	C	T	C	T	-0.1278	-0.0072	0.5358	0.5492	0.0272959	0.0063	2.8407e-06	0.2507	24589	5162	0.000890712	21.9195
979	rs4233306	IPF	M01605.metal.pos.txt.gz	C	T	C	T	0.2068	-0.0119	0.7913	0.7998	0.0349894	0.008	3.41357e-09	0.1385	24589	5162	0.00141864	34.9295
980	rs4642211	IPF	M01605.metal.pos.txt.gz	C	T	C	T	-0.1422	-0.0025	0.3539	0.3628	0.0285606	0.007	6.39523e-07	0.7144	24589	5162	0.00100713	24.7873
981	rs6560861	IPF	M01605.metal.pos.txt.gz	G	A	G	A	0.1636	-0.0074	0.1928	0.1814	0.0346732	0.0082	2.3778e-06	0.3702	24589	5162	0.000904574	22.2609
982	rs6786378	IPF	M01605.metal.pos.txt.gz	C	A	C	A	-0.1786	-0.0061	0.159	0.1451	0.0384673	0.009	3.43537e-06	0.4963	24589	5162	0.000875909	21.5549
983	rs7100920	IPF	M01605.metal.pos.txt.gz	C	T	C	T	-0.1744	0.0055	0.4612	0.509	0.0272959	0.0063	1.66726e-10	0.3821	24589	5162	0.00165743	40.8189
984	rs7138541	IPF	M01605.metal.pos.txt.gz	G	A	G	A	-0.1298	0.0019	0.3986	0.4051	0.0280337	0.0063	3.65408e-06	0.7616	24589	5162	0.000871104	21.4365
985	rs751709	IPF	M01605.metal.pos.txt.gz	G	T	G	T	0.4781	-0.0103	0.9761	0.9806	0.100858	0.0654	2.13372e-06	0.8753	24589	955	0.000913018	22.4689
986	rs757918	IPF	M01605.metal.pos.txt.gz	C	T	C	T	0.1254	-0.0037	0.4503	0.5022	0.0272959	0.0063	4.34644e-06	0.5518	24589	5162	0.000857601	21.1039
987	rs9860874	IPF	M01605.metal.pos.txt.gz	C	A	C	A	-0.2572	0.0048	0.7356	0.7476	0.0298253	0.0071	6.49092e-18	0.5053	24589	5162	0.00301523	74.3596
988	rs10967305	IPF	M01638.metal.pos.txt.gz	C	T	C	T	-0.1437	-0.0028	0.4135	0.4087	0.0276121	0.0023	1.94795e-07	0.2096	24589	7104	0.00110026	27.0819
989	rs11073517	IPF	M01638.metal.pos.txt.gz	C	T	C	T	-0.175	0.0001	0.7296	0.6845	0.0288768	0.0028	1.35927e-09	0.9835	24589	7104	0.00149138	36.7234
990	rs1123573	IPF	M01638.metal.pos.txt.gz	G	A	G	A	-0.1327	-0.0018	0.3867	0.3916	0.0282445	0.0023	2.62378e-06	0.4457	24589	7104	0.000896902	22.0719
991	rs11788059	IPF	M01638.metal.pos.txt.gz	C	T	C	T	0.1547	0.0028	0.3648	0.3238	0.0283498	0.0027	4.84737e-08	0.2984	24589	7104	0.00120952	29.7745
992	rs1214759	IPF	M01638.metal.pos.txt.gz	G	A	G	A	0.1652	-0.0055	0.6292	0.6652	0.0292984	0.0027	1.71495e-08	0.04077	24589	7104	0.00129131	31.7906
993	rs12610495	IPF	M01638.metal.pos.txt.gz	G	A	G	A	0.2495	0.003	0.2942	0.292	0.0304576	0.004	2.57551e-16	0.4533	23506	5369	0.00284664	67.0983
994	rs12753958	IPF	M01638.metal.pos.txt.gz	G	T	G	T	-0.1753	0.002	0.8151	0.8335	0.0349894	0.0036	5.44049e-07	0.5881	24589	7104	0.00101978	25.099
995	rs2076295	IPF	M01638.metal.pos.txt.gz	G	T	G	T	0.3966	0.0013	0.4145	0.4482	0.0270852	0.0023	1.49989e-48	0.5901	24589	7104	0.00864432	214.391
996	rs2197025	IPF	M01638.metal.pos.txt.gz	G	A	G	A	-0.144	-0.0018	0.4483	0.4882	0.0276121	0.0027	1.83716e-07	0.5085	24589	7104	0.00110485	27.1951
997	rs2609259	IPF	M01638.metal.pos.txt.gz	C	A	C	A	-0.2642	0.0014	0.7654	0.7819	0.0316169	0.0029	6.4725e-17	0.6171	24589	7104	0.00283174	69.8218
998	rs2967465	IPF	M01638.metal.pos.txt.gz	G	A	G	A	-0.2037	-0.005	0.1113	0.1262	0.0407858	0.0037	5.90247e-07	0.1834	24589	7104	0.0010134	24.9418
999	rs3808803	IPF	M01638.metal.pos.txt.gz	C	T	C	T	-0.1278	0.0048	0.5358	0.5502	0.0272959	0.0023	2.8407e-06	0.03645	24589	7104	0.000890712	21.9195
1000	rs4233306	IPF	M01638.metal.pos.txt.gz	C	T	C	T	0.2068	0.0096	0.7913	0.802	0.0349894	0.003	3.41357e-09	0.001245	24589	7104	0.00141864	34.9295
1001	rs4642211	IPF	M01638.metal.pos.txt.gz	C	T	C	T	-0.1422	0.0028	0.3539	0.355	0.0285606	0.0023	6.39523e-07	0.2323	24589	7104	0.00100713	24.7873
1002	rs6560861	IPF	M01638.metal.pos.txt.gz	G	A	G	A	0.1636	-0.0057	0.1928	0.1832	0.0346732	0.0031	2.3778e-06	0.06802	24589	7104	0.000904574	22.2609
1003	rs6786378	IPF	M01638.metal.pos.txt.gz	C	A	C	A	-0.1786	-0.0052	0.159	0.1457	0.0384673	0.0036	3.43537e-06	0.1431	24589	7104	0.000875909	21.5549
1004	rs7100920	IPF	M01638.metal.pos.txt.gz	C	T	C	T	-0.1744	0.0007	0.4612	0.5096	0.0272959	0.0023	1.66726e-10	0.7549	24589	7104	0.00165743	40.8189
1005	rs7138541	IPF	M01638.metal.pos.txt.gz	G	A	G	A	-0.1298	-0.0029	0.3986	0.4134	0.0280337	0.0023	3.65408e-06	0.206	24589	7104	0.000871104	21.4365
1006	rs751709	IPF	M01638.metal.pos.txt.gz	G	T	G	T	0.4781	-0.0117	0.9761	0.9814	0.100858	0.0189	2.13372e-06	0.5361	24589	1735	0.000913018	22.4689
1007	rs757918	IPF	M01638.metal.pos.txt.gz	C	T	C	T	0.1254	0.0027	0.4503	0.4974	0.0272959	0.0023	4.34644e-06	0.234	24589	7104	0.000857601	21.1039
1008	rs9860874	IPF	M01638.metal.pos.txt.gz	C	A	C	A	-0.2572	0.003	0.7356	0.7453	0.0298253	0.0028	6.49092e-18	0.2838	24589	7104	0.00301523	74.3596
1009	rs10967305	IPF	M01640.metal.pos.txt.gz	C	T	C	T	-0.1437	-0.0054	0.4135	0.4122	0.0276121	0.0104	1.94795e-07	0.6055	24589	2063	0.00110026	27.0819
1010	rs11073517	IPF	M01640.metal.pos.txt.gz	C	T	C	T	-0.175	-0.0062	0.7296	0.6978	0.0288768	0.0115	1.35927e-09	0.5889	24589	2063	0.00149138	36.7234
1011	rs1123573	IPF	M01640.metal.pos.txt.gz	G	A	G	A	-0.1327	-0.0006	0.3867	0.3995	0.0282445	0.0108	2.62378e-06	0.954	24589	2063	0.000896902	22.0719
1012	rs11788059	IPF	M01640.metal.pos.txt.gz	C	T	C	T	0.1547	0.0149	0.3648	0.3195	0.0283498	0.0111	4.84737e-08	0.1795	24589	2063	0.00120952	29.7745
1013	rs1214759	IPF	M01640.metal.pos.txt.gz	G	A	G	A	0.1652	-0.0056	0.6292	0.6583	0.0292984	0.0111	1.71495e-08	0.6108	24589	2063	0.00129131	31.7906
1014	rs12610495	IPF	M01640.metal.pos.txt.gz	G	A	G	A	0.2495	0.002	0.2942	0.292	0.0304576	0.0322	2.57551e-16	0.9505	23506	496	0.00284664	67.0983
1015	rs12753958	IPF	M01640.metal.pos.txt.gz	G	T	G	T	-0.1753	0.0038	0.8151	0.8158	0.0349894	0.0142	5.44049e-07	0.7879	24589	2063	0.00101978	25.099
1016	rs2076295	IPF	M01640.metal.pos.txt.gz	G	T	G	T	0.3966	-0.0022	0.4145	0.4562	0.0270852	0.011	1.49989e-48	0.8402	24589	2063	0.00864432	214.391
1017	rs2197025	IPF	M01640.metal.pos.txt.gz	G	A	G	A	-0.144	0.012	0.4483	0.493	0.0276121	0.0115	1.83716e-07	0.298	24589	2063	0.00110485	27.1951
1018	rs2609259	IPF	M01640.metal.pos.txt.gz	C	A	C	A	-0.2642	-0.006	0.7654	0.7789	0.0316169	0.0126	6.4725e-17	0.6305	24589	2063	0.00283174	69.8218
1019	rs2967465	IPF	M01640.metal.pos.txt.gz	G	A	G	A	-0.2037	0.0041	0.1113	0.1197	0.0407858	0.0167	5.90247e-07	0.8045	24589	2063	0.0010134	24.9418
1020	rs3808803	IPF	M01640.metal.pos.txt.gz	C	T	C	T	-0.1278	0.022	0.5358	0.541	0.0272959	0.0107	2.8407e-06	0.03968	24589	2063	0.000890712	21.9195
1021	rs4233306	IPF	M01640.metal.pos.txt.gz	C	T	C	T	0.2068	0.0084	0.7913	0.8005	0.0349894	0.0134	3.41357e-09	0.5308	24589	2063	0.00141864	34.9295
1022	rs4642211	IPF	M01640.metal.pos.txt.gz	C	T	C	T	-0.1422	-0.0111	0.3539	0.3372	0.0285606	0.011	6.39523e-07	0.3114	24589	2063	0.00100713	24.7873
1023	rs6560861	IPF	M01640.metal.pos.txt.gz	G	A	G	A	0.1636	-0.0182	0.1928	0.1846	0.0346732	0.0144	2.3778e-06	0.2062	24589	2063	0.000904574	22.2609
1024	rs6786378	IPF	M01640.metal.pos.txt.gz	C	A	C	A	-0.1786	0.0308	0.159	0.1463	0.0384673	0.0149	3.43537e-06	0.03864	24589	2063	0.000875909	21.5549
1025	rs7100920	IPF	M01640.metal.pos.txt.gz	C	T	C	T	-0.1744	-0.0272	0.4612	0.5169	0.0272959	0.0107	1.66726e-10	0.01129	24589	2063	0.00165743	40.8189
1026	rs7138541	IPF	M01640.metal.pos.txt.gz	G	A	G	A	-0.1298	-0.0077	0.3986	0.4379	0.0280337	0.0107	3.65408e-06	0.4712	24589	2063	0.000871104	21.4365
1027	rs751709	IPF	M01640.metal.pos.txt.gz	G	T	G	T	0.4781	0.0013	0.9761	0.9811	0.100858	0.0614	2.13372e-06	0.9833	24589	1567	0.000913018	22.4689
1028	rs757918	IPF	M01640.metal.pos.txt.gz	C	T	C	T	0.1254	0.001	0.4503	0.4895	0.0272959	0.0108	4.34644e-06	0.9252	24589	2063	0.000857601	21.1039
1029	rs9860874	IPF	M01640.metal.pos.txt.gz	C	A	C	A	-0.2572	0.0042	0.7356	0.7439	0.0298253	0.012	6.49092e-18	0.7256	24589	2063	0.00301523	74.3596
1030	rs10967305	IPF	M01642.metal.pos.txt.gz	C	T	C	T	-0.1437	-0.0003	0.4135	0.4085	0.0276121	0.0016	1.94795e-07	0.8406	24589	7352	0.00110026	27.0819
1031	rs11073517	IPF	M01642.metal.pos.txt.gz	C	T	C	T	-0.175	-0.0011	0.7296	0.6768	0.0288768	0.0017	1.35927e-09	0.4956	24589	7352	0.00149138	36.7234
1032	rs1123573	IPF	M01642.metal.pos.txt.gz	G	A	G	A	-0.1327	-0.0015	0.3867	0.391	0.0282445	0.0016	2.62378e-06	0.3656	24589	7352	0.000896902	22.0719
1033	rs11788059	IPF	M01642.metal.pos.txt.gz	C	T	C	T	0.1547	-0.0007	0.3648	0.3246	0.0283498	0.0017	4.84737e-08	0.659	24589	7352	0.00120952	29.7745
1034	rs1214759	IPF	M01642.metal.pos.txt.gz	G	A	G	A	0.1652	0.0004	0.6292	0.6714	0.0292984	0.0017	1.71495e-08	0.8312	24589	7352	0.00129131	31.7906
1035	rs12610495	IPF	M01642.metal.pos.txt.gz	G	A	G	A	0.2495	-0.001	0.2942	0.292	0.0304576	0.003	2.57551e-16	0.7389	23506	5588	0.00284664	67.0983
1036	rs12753958	IPF	M01642.metal.pos.txt.gz	G	T	G	T	-0.1753	0.0016	0.8151	0.8407	0.0349894	0.0027	5.44049e-07	0.5472	24589	7352	0.00101978	25.099
1037	rs2076295	IPF	M01642.metal.pos.txt.gz	G	T	G	T	0.3966	-0.0032	0.4145	0.4474	0.0270852	0.0017	1.49989e-48	0.05477	24589	7352	0.00864432	214.391
1038	rs2197025	IPF	M01642.metal.pos.txt.gz	G	A	G	A	-0.144	-0.0011	0.4483	0.4879	0.0276121	0.0021	1.83716e-07	0.5936	24589	7352	0.00110485	27.1951
1039	rs2609259	IPF	M01642.metal.pos.txt.gz	C	A	C	A	-0.2642	-0.0025	0.7654	0.7821	0.0316169	0.0022	6.4725e-17	0.2591	24589	7352	0.00283174	69.8218
1040	rs2967465	IPF	M01642.metal.pos.txt.gz	G	A	G	A	-0.2037	-0.0027	0.1113	0.1294	0.0407858	0.0025	5.90247e-07	0.282	24589	7352	0.0010134	24.9418
1041	rs3808803	IPF	M01642.metal.pos.txt.gz	C	T	C	T	-0.1278	-0.0019	0.5358	0.5509	0.0272959	0.0016	2.8407e-06	0.2391	24589	7352	0.000890712	21.9195
1042	rs4233306	IPF	M01642.metal.pos.txt.gz	C	T	C	T	0.2068	0.0002	0.7913	0.8017	0.0349894	0.0023	3.41357e-09	0.9157	24589	7352	0.00141864	34.9295
1043	rs4642211	IPF	M01642.metal.pos.txt.gz	C	T	C	T	-0.1422	-0.0015	0.3539	0.3586	0.0285606	0.0017	6.39523e-07	0.3786	24589	7352	0.00100713	24.7873
1044	rs6560861	IPF	M01642.metal.pos.txt.gz	G	A	G	A	0.1636	0.0024	0.1928	0.1831	0.0346732	0.0024	2.3778e-06	0.3142	24589	7352	0.000904574	22.2609
1045	rs6786378	IPF	M01642.metal.pos.txt.gz	C	A	C	A	-0.1786	-0.0018	0.159	0.1468	0.0384673	0.0024	3.43537e-06	0.4555	24589	7352	0.000875909	21.5549
1046	rs7100920	IPF	M01642.metal.pos.txt.gz	C	T	C	T	-0.1744	0.0027	0.4612	0.5078	0.0272959	0.0016	1.66726e-10	0.09493	24589	7352	0.00165743	40.8189
1047	rs7138541	IPF	M01642.metal.pos.txt.gz	G	A	G	A	-0.1298	0.0021	0.3986	0.4089	0.0280337	0.0016	3.65408e-06	0.1952	24589	7352	0.000871104	21.4365
1048	rs751709	IPF	M01642.metal.pos.txt.gz	G	T	G	T	0.4781	0.0035	0.9761	0.9813	0.100858	0.015	2.13372e-06	0.8177	24589	1764	0.000913018	22.4689
1049	rs757918	IPF	M01642.metal.pos.txt.gz	C	T	C	T	0.1254	-0.0009	0.4503	0.4987	0.0272959	0.0016	4.34644e-06	0.5799	24589	7352	0.000857601	21.1039
1050	rs9860874	IPF	M01642.metal.pos.txt.gz	C	A	C	A	-0.2572	-0.0014	0.7356	0.7454	0.0298253	0.0022	6.49092e-18	0.5154	24589	7352	0.00301523	74.3596
1051	rs10967305	IPF	M01644.metal.pos.txt.gz	C	T	C	T	-0.1437	-0.0015	0.4135	0.4077	0.0276121	0.0018	1.94795e-07	0.4099	24589	7355	0.00110026	27.0819
1052	rs11073517	IPF	M01644.metal.pos.txt.gz	C	T	C	T	-0.175	-0.001	0.7296	0.6772	0.0288768	0.0025	1.35927e-09	0.6861	24589	7355	0.00149138	36.7234
1053	rs1123573	IPF	M01644.metal.pos.txt.gz	G	A	G	A	-0.1327	-0.004	0.3867	0.3892	0.0282445	0.0018	2.62378e-06	0.02592	24589	7355	0.000896902	22.0719
1054	rs11788059	IPF	M01644.metal.pos.txt.gz	C	T	C	T	0.1547	-0.0006	0.3648	0.3246	0.0283498	0.0025	4.84737e-08	0.8114	24589	7355	0.00120952	29.7745
1055	rs1214759	IPF	M01644.metal.pos.txt.gz	G	A	G	A	0.1652	0.0009	0.6292	0.6711	0.0292984	0.0025	1.71495e-08	0.7191	24589	7355	0.00129131	31.7906
1056	rs12610495	IPF	M01644.metal.pos.txt.gz	G	A	G	A	0.2495	-0.004	0.2942	0.292	0.0304576	0.003	2.57551e-16	0.1824	23506	5589	0.00284664	67.0983
1057	rs12753958	IPF	M01644.metal.pos.txt.gz	G	T	G	T	-0.1753	0.0001	0.8151	0.8546	0.0349894	0.0032	5.44049e-07	0.9811	24589	7355	0.00101978	25.099
1058	rs2076295	IPF	M01644.metal.pos.txt.gz	G	T	G	T	0.3966	-0.001	0.4145	0.445	0.0270852	0.0018	1.49989e-48	0.5872	24589	7355	0.00864432	214.391
1059	rs2197025	IPF	M01644.metal.pos.txt.gz	G	A	G	A	-0.144	0.0021	0.4483	0.488	0.0276121	0.0025	1.83716e-07	0.3885	24589	7355	0.00110485	27.1951
1060	rs2609259	IPF	M01644.metal.pos.txt.gz	C	A	C	A	-0.2642	-0.0035	0.7654	0.7829	0.0316169	0.0026	6.4725e-17	0.1699	24589	7355	0.00283174	69.8218
1061	rs2967465	IPF	M01644.metal.pos.txt.gz	G	A	G	A	-0.2037	-0.0022	0.1113	0.1303	0.0407858	0.0034	5.90247e-07	0.5251	24589	7355	0.0010134	24.9418
1062	rs3808803	IPF	M01644.metal.pos.txt.gz	C	T	C	T	-0.1278	-0.0054	0.5358	0.5526	0.0272959	0.0018	2.8407e-06	0.002544	24589	7355	0.000890712	21.9195
1063	rs4233306	IPF	M01644.metal.pos.txt.gz	C	T	C	T	0.2068	0.0034	0.7913	0.8015	0.0349894	0.0026	3.41357e-09	0.1956	24589	7355	0.00141864	34.9295
1064	rs4642211	IPF	M01644.metal.pos.txt.gz	C	T	C	T	-0.1422	-0.0009	0.3539	0.3583	0.0285606	0.0025	6.39523e-07	0.7136	24589	7355	0.00100713	24.7873
1065	rs6560861	IPF	M01644.metal.pos.txt.gz	G	A	G	A	0.1636	0.0008	0.1928	0.1831	0.0346732	0.0027	2.3778e-06	0.7717	24589	7355	0.000904574	22.2609
1066	rs6786378	IPF	M01644.metal.pos.txt.gz	C	A	C	A	-0.1786	-0.0013	0.159	0.1472	0.0384673	0.0027	3.43537e-06	0.6371	24589	7355	0.000875909	21.5549
1067	rs7100920	IPF	M01644.metal.pos.txt.gz	C	T	C	T	-0.1744	0.0001	0.4612	0.5059	0.0272959	0.0018	1.66726e-10	0.9342	24589	7355	0.00165743	40.8189
1068	rs7138541	IPF	M01644.metal.pos.txt.gz	G	A	G	A	-0.1298	0.0032	0.3986	0.4016	0.0280337	0.0018	3.65408e-06	0.07517	24589	7355	0.000871104	21.4365
1069	rs751709	IPF	M01644.metal.pos.txt.gz	G	T	G	T	0.4781	0.0119	0.9761	0.9813	0.100858	0.0221	2.13372e-06	0.589	24589	1766	0.000913018	22.4689
1070	rs757918	IPF	M01644.metal.pos.txt.gz	C	T	C	T	0.1254	-0.0019	0.4503	0.5002	0.0272959	0.0018	4.34644e-06	0.2844	24589	7355	0.000857601	21.1039
1071	rs9860874	IPF	M01644.metal.pos.txt.gz	C	A	C	A	-0.2572	-0.0004	0.7356	0.747	0.0298253	0.0025	6.49092e-18	0.8882	24589	7355	0.00301523	74.3596
1072	rs10967305	IPF	M01645.metal.pos.txt.gz	C	T	C	T	-0.1437	0.0017	0.4135	0.4079	0.0276121	0.0017	1.94795e-07	0.3309	24589	7346	0.00110026	27.0819
1073	rs11073517	IPF	M01645.metal.pos.txt.gz	C	T	C	T	-0.175	-0.0007	0.7296	0.6733	0.0288768	0.0018	1.35927e-09	0.7089	24589	7346	0.00149138	36.7234
1074	rs1123573	IPF	M01645.metal.pos.txt.gz	G	A	G	A	-0.1327	0.0016	0.3867	0.3897	0.0282445	0.0018	2.62378e-06	0.3529	24589	7346	0.000896902	22.0719
1075	rs11788059	IPF	M01645.metal.pos.txt.gz	C	T	C	T	0.1547	-0.0032	0.3648	0.3257	0.0283498	0.0018	4.84737e-08	0.07214	24589	7346	0.00120952	29.7745
1076	rs1214759	IPF	M01645.metal.pos.txt.gz	G	A	G	A	0.1652	-0.0005	0.6292	0.6742	0.0292984	0.0018	1.71495e-08	0.7728	24589	7346	0.00129131	31.7906
1077	rs12610495	IPF	M01645.metal.pos.txt.gz	G	A	G	A	0.2495	0	0.2942	0.292	0.0304576	0.003	2.57551e-16	1	23506	5579	0.00284664	67.0983
1078	rs12753958	IPF	M01645.metal.pos.txt.gz	G	T	G	T	-0.1753	0.0006	0.8151	0.8503	0.0349894	0.0031	5.44049e-07	0.836	24589	7346	0.00101978	25.099
1079	rs2076295	IPF	M01645.metal.pos.txt.gz	G	T	G	T	0.3966	-0.0043	0.4145	0.4456	0.0270852	0.0018	1.49989e-48	0.01585	24589	7346	0.00864432	214.391
1080	rs2197025	IPF	M01645.metal.pos.txt.gz	G	A	G	A	-0.144	-0.0036	0.4483	0.4879	0.0276121	0.0024	1.83716e-07	0.1334	24589	7346	0.00110485	27.1951
1081	rs2609259	IPF	M01645.metal.pos.txt.gz	C	A	C	A	-0.2642	0.0014	0.7654	0.7827	0.0316169	0.0025	6.4725e-17	0.557	24589	7346	0.00283174	69.8218
1082	rs2967465	IPF	M01645.metal.pos.txt.gz	G	A	G	A	-0.2037	-0.0011	0.1113	0.1315	0.0407858	0.0027	5.90247e-07	0.6688	24589	7346	0.0010134	24.9418
1083	rs3808803	IPF	M01645.metal.pos.txt.gz	C	T	C	T	-0.1278	-0.0009	0.5358	0.5521	0.0272959	0.0018	2.8407e-06	0.6146	24589	7346	0.000890712	21.9195
1084	rs4233306	IPF	M01645.metal.pos.txt.gz	C	T	C	T	0.2068	-0.0003	0.7913	0.8016	0.0349894	0.0025	3.41357e-09	0.8995	24589	7346	0.00141864	34.9295
1085	rs4642211	IPF	M01645.metal.pos.txt.gz	C	T	C	T	-0.1422	-0.0003	0.3539	0.3629	0.0285606	0.0018	6.39523e-07	0.8648	24589	7346	0.00100713	24.7873
1086	rs6560861	IPF	M01645.metal.pos.txt.gz	G	A	G	A	0.1636	0.0037	0.1928	0.1831	0.0346732	0.0026	2.3778e-06	0.1496	24589	7346	0.000904574	22.2609
1087	rs6786378	IPF	M01645.metal.pos.txt.gz	C	A	C	A	-0.1786	-0.0015	0.159	0.1471	0.0384673	0.0026	3.43537e-06	0.5615	24589	7346	0.000875909	21.5549
1088	rs7100920	IPF	M01645.metal.pos.txt.gz	C	T	C	T	-0.1744	0.0032	0.4612	0.5064	0.0272959	0.0018	1.66726e-10	0.07095	24589	7346	0.00165743	40.8189
1089	rs7138541	IPF	M01645.metal.pos.txt.gz	G	A	G	A	-0.1298	0.0006	0.3986	0.4038	0.0280337	0.0018	3.65408e-06	0.736	24589	7346	0.000871104	21.4365
1090	rs751709	IPF	M01645.metal.pos.txt.gz	G	T	G	T	0.4781	0.0047	0.9761	0.9813	0.100858	0.0195	2.13372e-06	0.8101	24589	1767	0.000913018	22.4689
1091	rs757918	IPF	M01645.metal.pos.txt.gz	C	T	C	T	0.1254	0.0008	0.4503	0.4998	0.0272959	0.0018	4.34644e-06	0.65	24589	7346	0.000857601	21.1039
1092	rs9860874	IPF	M01645.metal.pos.txt.gz	C	A	C	A	-0.2572	0.0015	0.7356	0.7465	0.0298253	0.0024	6.49092e-18	0.538	24589	7346	0.00301523	74.3596
1093	rs10967305	IPF	M01649.metal.pos.txt.gz	C	T	C	T	-0.1437	-0.0008	0.4135	0.4087	0.0276121	0.0012	1.94795e-07	0.4851	24589	7359	0.00110026	27.0819
1094	rs11073517	IPF	M01649.metal.pos.txt.gz	C	T	C	T	-0.175	-0.0018	0.7296	0.6785	0.0288768	0.0012	1.35927e-09	0.1357	24589	7359	0.00149138	36.7234
1095	rs1123573	IPF	M01649.metal.pos.txt.gz	G	A	G	A	-0.1327	-0.0001	0.3867	0.3918	0.0282445	0.0012	2.62378e-06	0.961	24589	7359	0.000896902	22.0719
1096	rs11788059	IPF	M01649.metal.pos.txt.gz	C	T	C	T	0.1547	-0.0008	0.3648	0.3243	0.0283498	0.0012	4.84737e-08	0.4932	24589	7359	0.00120952	29.7745
1097	rs1214759	IPF	M01649.metal.pos.txt.gz	G	A	G	A	0.1652	0.0007	0.6292	0.67	0.0292984	0.0012	1.71495e-08	0.5779	24589	7359	0.00129131	31.7906
1098	rs12610495	IPF	M01649.metal.pos.txt.gz	G	A	G	A	0.2495	0.001	0.2942	0.292	0.0304576	0.003	2.57551e-16	0.7359	23506	5596	0.00284664	67.0983
1099	rs12753958	IPF	M01649.metal.pos.txt.gz	G	T	G	T	-0.1753	-0.0018	0.8151	0.8366	0.0349894	0.0019	5.44049e-07	0.331	24589	7359	0.00101978	25.099
1100	rs2076295	IPF	M01649.metal.pos.txt.gz	G	T	G	T	0.3966	0.0007	0.4145	0.4479	0.0270852	0.0012	1.49989e-48	0.5355	24589	7359	0.00864432	214.391
1101	rs2197025	IPF	M01649.metal.pos.txt.gz	G	A	G	A	-0.144	-0.0012	0.4483	0.4876	0.0276121	0.0017	1.83716e-07	0.4817	24589	7359	0.00110485	27.1951
1102	rs2609259	IPF	M01649.metal.pos.txt.gz	C	A	C	A	-0.2642	-0.003	0.7654	0.7816	0.0316169	0.0018	6.4725e-17	0.09239	24589	7359	0.00283174	69.8218
1103	rs2967465	IPF	M01649.metal.pos.txt.gz	G	A	G	A	-0.2037	0.0007	0.1113	0.1255	0.0407858	0.0021	5.90247e-07	0.7443	24589	7359	0.0010134	24.9418
1104	rs3808803	IPF	M01649.metal.pos.txt.gz	C	T	C	T	-0.1278	0.002	0.5358	0.5502	0.0272959	0.0012	2.8407e-06	0.08273	24589	7359	0.000890712	21.9195
1105	rs4233306	IPF	M01649.metal.pos.txt.gz	C	T	C	T	0.2068	0.0009	0.7913	0.8022	0.0349894	0.0019	3.41357e-09	0.6147	24589	7359	0.00141864	34.9295
1106	rs4642211	IPF	M01649.metal.pos.txt.gz	C	T	C	T	-0.1422	0.0002	0.3539	0.3568	0.0285606	0.0012	6.39523e-07	0.8679	24589	7359	0.00100713	24.7873
1107	rs6560861	IPF	M01649.metal.pos.txt.gz	G	A	G	A	0.1636	0.0005	0.1928	0.1831	0.0346732	0.002	2.3778e-06	0.8013	24589	7359	0.000904574	22.2609
1108	rs6786378	IPF	M01649.metal.pos.txt.gz	C	A	C	A	-0.1786	0.002	0.159	0.1461	0.0384673	0.002	3.43537e-06	0.3285	24589	7359	0.000875909	21.5549
1109	rs7100920	IPF	M01649.metal.pos.txt.gz	C	T	C	T	-0.1744	-0.0002	0.4612	0.5089	0.0272959	0.0012	1.66726e-10	0.8418	24589	7359	0.00165743	40.8189
1110	rs7138541	IPF	M01649.metal.pos.txt.gz	G	A	G	A	-0.1298	0	0.3986	0.4115	0.0280337	0.0012	3.65408e-06	0.9732	24589	7359	0.000871104	21.4365
1111	rs751709	IPF	M01649.metal.pos.txt.gz	G	T	G	T	0.4781	0.0067	0.9761	0.9813	0.100858	0.0101	2.13372e-06	0.5081	24589	1763	0.000913018	22.4689
1112	rs757918	IPF	M01649.metal.pos.txt.gz	C	T	C	T	0.1254	0	0.4503	0.498	0.0272959	0.0012	4.34644e-06	0.9865	24589	7359	0.000857601	21.1039
1113	rs9860874	IPF	M01649.metal.pos.txt.gz	C	A	C	A	-0.2572	-0.0003	0.7356	0.7441	0.0298253	0.0017	6.49092e-18	0.8461	24589	7359	0.00301523	74.3596
1114	rs10967305	IPF	M01670.metal.pos.txt.gz	C	T	C	T	-0.1437	-0.0022	0.4135	0.4083	0.0276121	0.0024	1.94795e-07	0.3638	24589	7348	0.00110026	27.0819
1115	rs11073517	IPF	M01670.metal.pos.txt.gz	C	T	C	T	-0.175	-0.0033	0.7296	0.6769	0.0288768	0.0025	1.35927e-09	0.1852	24589	7348	0.00149138	36.7234
1116	rs1123573	IPF	M01670.metal.pos.txt.gz	G	A	G	A	-0.1327	0.0029	0.3867	0.3908	0.0282445	0.0025	2.62378e-06	0.2494	24589	7348	0.000896902	22.0719
1117	rs11788059	IPF	M01670.metal.pos.txt.gz	C	T	C	T	0.1547	0.0061	0.3648	0.3247	0.0283498	0.0025	4.84737e-08	0.01525	24589	7348	0.00120952	29.7745
1118	rs1214759	IPF	M01670.metal.pos.txt.gz	G	A	G	A	0.1652	-0.0016	0.6292	0.6714	0.0292984	0.0025	1.71495e-08	0.5289	24589	7348	0.00129131	31.7906
1119	rs12610495	IPF	M01670.metal.pos.txt.gz	G	A	G	A	0.2495	0.002	0.2942	0.292	0.0304576	0.003	2.57551e-16	0.505	23506	5587	0.00284664	67.0983
1120	rs12753958	IPF	M01670.metal.pos.txt.gz	G	T	G	T	-0.1753	0.0021	0.8151	0.8555	0.0349894	0.0032	5.44049e-07	0.52	24589	7348	0.00101978	25.099
1121	rs2076295	IPF	M01670.metal.pos.txt.gz	G	T	G	T	0.3966	0.0039	0.4145	0.4472	0.0270852	0.0025	1.49989e-48	0.1194	24589	7348	0.00864432	214.391
1122	rs2197025	IPF	M01670.metal.pos.txt.gz	G	A	G	A	-0.144	-0.0024	0.4483	0.4882	0.0276121	0.0025	1.83716e-07	0.3307	24589	7348	0.00110485	27.1951
1123	rs2609259	IPF	M01670.metal.pos.txt.gz	C	A	C	A	-0.2642	-0.0043	0.7654	0.7829	0.0316169	0.0026	6.4725e-17	0.09255	24589	7348	0.00283174	69.8218
1124	rs2967465	IPF	M01670.metal.pos.txt.gz	G	A	G	A	-0.2037	-0.0021	0.1113	0.1305	0.0407858	0.0034	5.90247e-07	0.5352	24589	7348	0.0010134	24.9418
1125	rs3808803	IPF	M01670.metal.pos.txt.gz	C	T	C	T	-0.1278	0.0007	0.5358	0.5508	0.0272959	0.0025	2.8407e-06	0.7695	24589	7348	0.000890712	21.9195
1126	rs4233306	IPF	M01670.metal.pos.txt.gz	C	T	C	T	0.2068	-0.0036	0.7913	0.8013	0.0349894	0.0026	3.41357e-09	0.1732	24589	7348	0.00141864	34.9295
1127	rs4642211	IPF	M01670.metal.pos.txt.gz	C	T	C	T	-0.1422	-0.0019	0.3539	0.3588	0.0285606	0.0025	6.39523e-07	0.4518	24589	7348	0.00100713	24.7873
1128	rs6560861	IPF	M01670.metal.pos.txt.gz	G	A	G	A	0.1636	-0.0003	0.1928	0.183	0.0346732	0.0027	2.3778e-06	0.9013	24589	7348	0.000904574	22.2609
1129	rs6786378	IPF	M01670.metal.pos.txt.gz	C	A	C	A	-0.1786	0.0008	0.159	0.147	0.0384673	0.0033	3.43537e-06	0.8004	24589	7348	0.000875909	21.5549
1130	rs7100920	IPF	M01670.metal.pos.txt.gz	C	T	C	T	-0.1744	-0.0009	0.4612	0.5079	0.0272959	0.0025	1.66726e-10	0.705	24589	7348	0.00165743	40.8189
1131	rs7138541	IPF	M01670.metal.pos.txt.gz	G	A	G	A	-0.1298	0.0033	0.3986	0.4092	0.0280337	0.0025	3.65408e-06	0.1815	24589	7348	0.000871104	21.4365
1132	rs751709	IPF	M01670.metal.pos.txt.gz	G	T	G	T	0.4781	-0.0091	0.9761	0.9813	0.100858	0.0227	2.13372e-06	0.6877	24589	1761	0.000913018	22.4689
1133	rs757918	IPF	M01670.metal.pos.txt.gz	C	T	C	T	0.1254	0.0001	0.4503	0.499	0.0272959	0.0025	4.34644e-06	0.9583	24589	7348	0.000857601	21.1039
1134	rs9860874	IPF	M01670.metal.pos.txt.gz	C	A	C	A	-0.2572	0.0001	0.7356	0.7468	0.0298253	0.0025	6.49092e-18	0.9734	24589	7348	0.00301523	74.3596
1135	rs10967305	IPF	M01712.metal.pos.txt.gz	C	T	C	T	-0.1437	-0.0034	0.4135	0.409	0.0276121	0.0031	1.94795e-07	0.2748	24589	7346	0.00110026	27.0819
1136	rs11073517	IPF	M01712.metal.pos.txt.gz	C	T	C	T	-0.175	-0.0027	0.7296	0.6806	0.0288768	0.0033	1.35927e-09	0.4067	24589	7346	0.00149138	36.7234
1137	rs1123573	IPF	M01712.metal.pos.txt.gz	G	A	G	A	-0.1327	0.002	0.3867	0.3921	0.0282445	0.0032	2.62378e-06	0.5365	24589	7346	0.000896902	22.0719
1138	rs11788059	IPF	M01712.metal.pos.txt.gz	C	T	C	T	0.1547	-0.0009	0.3648	0.3239	0.0283498	0.0032	4.84737e-08	0.7693	24589	7346	0.00120952	29.7745
1139	rs1214759	IPF	M01712.metal.pos.txt.gz	G	A	G	A	0.1652	-0.0036	0.6292	0.6677	0.0292984	0.0032	1.71495e-08	0.2675	24589	7346	0.00129131	31.7906
1140	rs12610495	IPF	M01712.metal.pos.txt.gz	G	A	G	A	0.2495	-0.003	0.2942	0.292	0.0304576	0.0053	2.57551e-16	0.571	23506	5593	0.00284664	67.0983
1141	rs12753958	IPF	M01712.metal.pos.txt.gz	G	T	G	T	-0.1753	-0.0012	0.8151	0.8425	0.0349894	0.0044	5.44049e-07	0.7888	24589	7346	0.00101978	25.099
1142	rs2076295	IPF	M01712.metal.pos.txt.gz	G	T	G	T	0.3966	-0.005	0.4145	0.4492	0.0270852	0.0032	1.49989e-48	0.122	24589	7346	0.00864432	214.391
1143	rs2197025	IPF	M01712.metal.pos.txt.gz	G	A	G	A	-0.144	-0.0023	0.4483	0.4876	0.0276121	0.0037	1.83716e-07	0.534	24589	7346	0.00110485	27.1951
1144	rs2609259	IPF	M01712.metal.pos.txt.gz	C	A	C	A	-0.2642	0.0012	0.7654	0.7818	0.0316169	0.0038	6.4725e-17	0.7596	24589	7346	0.00283174	69.8218
1145	rs2967465	IPF	M01712.metal.pos.txt.gz	G	A	G	A	-0.2037	-0.0063	0.1113	0.1272	0.0407858	0.0048	5.90247e-07	0.1964	24589	7346	0.0010134	24.9418
1146	rs3808803	IPF	M01712.metal.pos.txt.gz	C	T	C	T	-0.1278	-0.0051	0.5358	0.5496	0.0272959	0.0031	2.8407e-06	0.102	24589	7346	0.000890712	21.9195
1147	rs4233306	IPF	M01712.metal.pos.txt.gz	C	T	C	T	0.2068	0.0012	0.7913	0.8016	0.0349894	0.004	3.41357e-09	0.7543	24589	7346	0.00141864	34.9295
1148	rs4642211	IPF	M01712.metal.pos.txt.gz	C	T	C	T	-0.1422	0.0061	0.3539	0.3538	0.0285606	0.0032	6.39523e-07	0.06015	24589	7346	0.00100713	24.7873
1149	rs6560861	IPF	M01712.metal.pos.txt.gz	G	A	G	A	0.1636	0.0032	0.1928	0.183	0.0346732	0.0041	2.3778e-06	0.4338	24589	7346	0.000904574	22.2609
1150	rs6786378	IPF	M01712.metal.pos.txt.gz	C	A	C	A	-0.1786	-0.0018	0.159	0.1464	0.0384673	0.0046	3.43537e-06	0.697	24589	7346	0.000875909	21.5549
1151	rs7100920	IPF	M01712.metal.pos.txt.gz	C	T	C	T	-0.1744	0.0053	0.4612	0.5091	0.0272959	0.0032	1.66726e-10	0.0942	24589	7346	0.00165743	40.8189
1152	rs7138541	IPF	M01712.metal.pos.txt.gz	G	A	G	A	-0.1298	0.0025	0.3986	0.4148	0.0280337	0.0032	3.65408e-06	0.431	24589	7346	0.000871104	21.4365
1153	rs751709	IPF	M01712.metal.pos.txt.gz	G	T	G	T	0.4781	-0.016	0.9761	0.9812	0.100858	0.0251	2.13372e-06	0.5228	24589	1753	0.000913018	22.4689
1154	rs757918	IPF	M01712.metal.pos.txt.gz	C	T	C	T	0.1254	-0.002	0.4503	0.4978	0.0272959	0.0032	4.34644e-06	0.5204	24589	7346	0.000857601	21.1039
1155	rs9860874	IPF	M01712.metal.pos.txt.gz	C	A	C	A	-0.2572	-0.0032	0.7356	0.7461	0.0298253	0.0033	6.49092e-18	0.3289	24589	7346	0.00301523	74.3596
1156	rs10967305	IPF	M01769.metal.pos.txt.gz	C	T	C	T	-0.1437	-0.0015	0.4135	0.4081	0.0276121	0.0017	1.94795e-07	0.37	24589	7136	0.00110026	27.0819
1157	rs11073517	IPF	M01769.metal.pos.txt.gz	C	T	C	T	-0.175	-0.0011	0.7296	0.6812	0.0288768	0.0023	1.35927e-09	0.6431	24589	7136	0.00149138	36.7234
1158	rs1123573	IPF	M01769.metal.pos.txt.gz	G	A	G	A	-0.1327	0.0002	0.3867	0.3906	0.0282445	0.0017	2.62378e-06	0.9146	24589	7136	0.000896902	22.0719
1159	rs11788059	IPF	M01769.metal.pos.txt.gz	C	T	C	T	0.1547	-0.0025	0.3648	0.3238	0.0283498	0.0023	4.84737e-08	0.2784	24589	7136	0.00120952	29.7745
1160	rs1214759	IPF	M01769.metal.pos.txt.gz	G	A	G	A	0.1652	-0.0017	0.6292	0.6661	0.0292984	0.0022	1.71495e-08	0.4423	24589	7136	0.00129131	31.7906
1161	rs12610495	IPF	M01769.metal.pos.txt.gz	G	A	G	A	0.2495	-0.002	0.2942	0.292	0.0304576	0.003	2.57551e-16	0.505	23506	5422	0.00284664	67.0983
1162	rs12753958	IPF	M01769.metal.pos.txt.gz	G	T	G	T	-0.1753	0.003	0.8151	0.8464	0.0349894	0.0029	5.44049e-07	0.2982	24589	7136	0.00101978	25.099
1163	rs2076295	IPF	M01769.metal.pos.txt.gz	G	T	G	T	0.3966	-0.0025	0.4145	0.4464	0.0270852	0.0017	1.49989e-48	0.1564	24589	7136	0.00864432	214.391
1164	rs2197025	IPF	M01769.metal.pos.txt.gz	G	A	G	A	-0.144	0.0012	0.4483	0.4879	0.0276121	0.0023	1.83716e-07	0.5825	24589	7136	0.00110485	27.1951
1165	rs2609259	IPF	M01769.metal.pos.txt.gz	C	A	C	A	-0.2642	-0.0022	0.7654	0.7829	0.0316169	0.0024	6.4725e-17	0.3575	24589	7136	0.00283174	69.8218
1166	rs2967465	IPF	M01769.metal.pos.txt.gz	G	A	G	A	-0.2037	0.001	0.1113	0.1281	0.0407858	0.0032	5.90247e-07	0.7635	24589	7136	0.0010134	24.9418
1167	rs3808803	IPF	M01769.metal.pos.txt.gz	C	T	C	T	-0.1278	-0.003	0.5358	0.5511	0.0272959	0.0017	2.8407e-06	0.07898	24589	7136	0.000890712	21.9195
1168	rs4233306	IPF	M01769.metal.pos.txt.gz	C	T	C	T	0.2068	-0.0009	0.7913	0.8012	0.0349894	0.0024	3.41357e-09	0.7026	24589	7136	0.00141864	34.9295
1169	rs4642211	IPF	M01769.metal.pos.txt.gz	C	T	C	T	-0.1422	0.002	0.3539	0.3531	0.0285606	0.0023	6.39523e-07	0.3876	24589	7136	0.00100713	24.7873
1170	rs6560861	IPF	M01769.metal.pos.txt.gz	G	A	G	A	0.1636	0.0045	0.1928	0.1831	0.0346732	0.0025	2.3778e-06	0.075	24589	7136	0.000904574	22.2609
1171	rs6786378	IPF	M01769.metal.pos.txt.gz	C	A	C	A	-0.1786	-0.0004	0.159	0.1455	0.0384673	0.0031	3.43537e-06	0.8959	24589	7136	0.000875909	21.5549
1172	rs7100920	IPF	M01769.metal.pos.txt.gz	C	T	C	T	-0.1744	0.0031	0.4612	0.5069	0.0272959	0.0017	1.66726e-10	0.06847	24589	7136	0.00165743	40.8189
1173	rs7138541	IPF	M01769.metal.pos.txt.gz	G	A	G	A	-0.1298	0.0004	0.3986	0.4058	0.0280337	0.0017	3.65408e-06	0.8122	24589	7136	0.000871104	21.4365
1174	rs751709	IPF	M01769.metal.pos.txt.gz	G	T	G	T	0.4781	-0.0016	0.9761	0.9811	0.100858	0.0172	2.13372e-06	0.9242	24589	1714	0.000913018	22.4689
1175	rs757918	IPF	M01769.metal.pos.txt.gz	C	T	C	T	0.1254	-0.0034	0.4503	0.4995	0.0272959	0.0017	4.34644e-06	0.05064	24589	7136	0.000857601	21.1039
1176	rs9860874	IPF	M01769.metal.pos.txt.gz	C	A	C	A	-0.2572	-0.0052	0.7356	0.746	0.0298253	0.0023	6.49092e-18	0.02495	24589	7136	0.00301523	74.3596
1177	rs10967305	IPF	M01898.metal.pos.txt.gz	C	T	C	T	-0.1437	0.0004	0.4135	0.4079	0.0276121	0.0017	1.94795e-07	0.8022	24589	7367	0.00110026	27.0819
1178	rs11073517	IPF	M01898.metal.pos.txt.gz	C	T	C	T	-0.175	-0.0009	0.7296	0.6735	0.0288768	0.0018	1.35927e-09	0.6207	24589	7367	0.00149138	36.7234
1179	rs1123573	IPF	M01898.metal.pos.txt.gz	G	A	G	A	-0.1327	-0.0018	0.3867	0.3898	0.0282445	0.0018	2.62378e-06	0.3066	24589	7367	0.000896902	22.0719
1180	rs11788059	IPF	M01898.metal.pos.txt.gz	C	T	C	T	0.1547	0.0018	0.3648	0.3257	0.0283498	0.0018	4.84737e-08	0.3036	24589	7367	0.00120952	29.7745
1181	rs1214759	IPF	M01898.metal.pos.txt.gz	G	A	G	A	0.1652	0.0027	0.6292	0.674	0.0292984	0.0018	1.71495e-08	0.1188	24589	7367	0.00129131	31.7906
1182	rs12610495	IPF	M01898.metal.pos.txt.gz	G	A	G	A	0.2495	-0.002	0.2942	0.292	0.0304576	0.003	2.57551e-16	0.505	23506	5601	0.00284664	67.0983
1183	rs12753958	IPF	M01898.metal.pos.txt.gz	G	T	G	T	-0.1753	0.0021	0.8151	0.8495	0.0349894	0.003	5.44049e-07	0.4829	24589	7367	0.00101978	25.099
1184	rs2076295	IPF	M01898.metal.pos.txt.gz	G	T	G	T	0.3966	0.0011	0.4145	0.4458	0.0270852	0.0018	1.49989e-48	0.5214	24589	7367	0.00864432	214.391
1185	rs2197025	IPF	M01898.metal.pos.txt.gz	G	A	G	A	-0.144	0.0017	0.4483	0.488	0.0276121	0.0024	1.83716e-07	0.4695	24589	7367	0.00110485	27.1951
1186	rs2609259	IPF	M01898.metal.pos.txt.gz	C	A	C	A	-0.2642	-0.0021	0.7654	0.7828	0.0316169	0.0025	6.4725e-17	0.3919	24589	7367	0.00283174	69.8218
1187	rs2967465	IPF	M01898.metal.pos.txt.gz	G	A	G	A	-0.2037	-0.0027	0.1113	0.1313	0.0407858	0.0027	5.90247e-07	0.3068	24589	7367	0.0010134	24.9418
1188	rs3808803	IPF	M01898.metal.pos.txt.gz	C	T	C	T	-0.1278	0.0017	0.5358	0.552	0.0272959	0.0017	2.8407e-06	0.3331	24589	7367	0.000890712	21.9195
1189	rs4233306	IPF	M01898.metal.pos.txt.gz	C	T	C	T	0.2068	-0.001	0.7913	0.8016	0.0349894	0.0025	3.41357e-09	0.6941	24589	7367	0.00141864	34.9295
1190	rs4642211	IPF	M01898.metal.pos.txt.gz	C	T	C	T	-0.1422	-0.0022	0.3539	0.3625	0.0285606	0.0018	6.39523e-07	0.2148	24589	7367	0.00100713	24.7873
1191	rs6560861	IPF	M01898.metal.pos.txt.gz	G	A	G	A	0.1636	0.0014	0.1928	0.1831	0.0346732	0.0026	2.3778e-06	0.5976	24589	7367	0.000904574	22.2609
1192	rs6786378	IPF	M01898.metal.pos.txt.gz	C	A	C	A	-0.1786	-0.0019	0.159	0.1471	0.0384673	0.0026	3.43537e-06	0.4684	24589	7367	0.000875909	21.5549
1193	rs7100920	IPF	M01898.metal.pos.txt.gz	C	T	C	T	-0.1744	0.0043	0.4612	0.5066	0.0272959	0.0018	1.66726e-10	0.01555	24589	7367	0.00165743	40.8189
1194	rs7138541	IPF	M01898.metal.pos.txt.gz	G	A	G	A	-0.1298	0.0011	0.3986	0.4042	0.0280337	0.0017	3.65408e-06	0.537	24589	7367	0.000871104	21.4365
1195	rs751709	IPF	M01898.metal.pos.txt.gz	G	T	G	T	0.4781	-0.0125	0.9761	0.9813	0.100858	0.0191	2.13372e-06	0.5146	24589	1766	0.000913018	22.4689
1196	rs757918	IPF	M01898.metal.pos.txt.gz	C	T	C	T	0.1254	0.0041	0.4503	0.4996	0.0272959	0.0018	4.34644e-06	0.02032	24589	7367	0.000857601	21.1039
1197	rs9860874	IPF	M01898.metal.pos.txt.gz	C	A	C	A	-0.2572	-0.0028	0.7356	0.7464	0.0298253	0.0024	6.49092e-18	0.2545	24589	7367	0.00301523	74.3596
1198	rs10967305	IPF	M02132.metal.pos.txt.gz	C	T	C	T	-0.1437	-0.0008	0.4135	0.4083	0.0276121	0.0017	1.94795e-07	0.6264	24589	7325	0.00110026	27.0819
1199	rs11073517	IPF	M02132.metal.pos.txt.gz	C	T	C	T	-0.175	-0.0032	0.7296	0.6749	0.0288768	0.0017	1.35927e-09	0.06627	24589	7325	0.00149138	36.7234
1200	rs1123573	IPF	M02132.metal.pos.txt.gz	G	A	G	A	-0.1327	0.0006	0.3867	0.3903	0.0282445	0.0017	2.62378e-06	0.7135	24589	7325	0.000896902	22.0719
1201	rs11788059	IPF	M02132.metal.pos.txt.gz	C	T	C	T	0.1547	-0.0005	0.3648	0.3252	0.0283498	0.0017	4.84737e-08	0.7928	24589	7325	0.00120952	29.7745
1202	rs1214759	IPF	M02132.metal.pos.txt.gz	G	A	G	A	0.1652	0.0019	0.6292	0.6731	0.0292984	0.0017	1.71495e-08	0.2708	24589	7325	0.00129131	31.7906
1203	rs12610495	IPF	M02132.metal.pos.txt.gz	G	A	G	A	0.2495	-0.006	0.2942	0.292	0.0304576	0.003	2.57551e-16	0.0455	23506	5572	0.00284664	67.0983
1204	rs12753958	IPF	M02132.metal.pos.txt.gz	G	T	G	T	-0.1753	0.0022	0.8151	0.8461	0.0349894	0.0029	5.44049e-07	0.4474	24589	7325	0.00101978	25.099
1205	rs2076295	IPF	M02132.metal.pos.txt.gz	G	T	G	T	0.3966	-0.0011	0.4145	0.4462	0.0270852	0.0017	1.49989e-48	0.5181	24589	7325	0.00864432	214.391
1206	rs2197025	IPF	M02132.metal.pos.txt.gz	G	A	G	A	-0.144	-0.0045	0.4483	0.4881	0.0276121	0.0023	1.83716e-07	0.04691	24589	7325	0.00110485	27.1951
1207	rs2609259	IPF	M02132.metal.pos.txt.gz	C	A	C	A	-0.2642	0.0002	0.7654	0.7825	0.0316169	0.0024	6.4725e-17	0.9265	24589	7325	0.00283174	69.8218
1208	rs2967465	IPF	M02132.metal.pos.txt.gz	G	A	G	A	-0.2037	0.0013	0.1113	0.1306	0.0407858	0.0026	5.90247e-07	0.6137	24589	7325	0.0010134	24.9418
1209	rs3808803	IPF	M02132.metal.pos.txt.gz	C	T	C	T	-0.1278	-0.0005	0.5358	0.5517	0.0272959	0.0017	2.8407e-06	0.7543	24589	7325	0.000890712	21.9195
1210	rs4233306	IPF	M02132.metal.pos.txt.gz	C	T	C	T	0.2068	0.0016	0.7913	0.8019	0.0349894	0.0024	3.41357e-09	0.5128	24589	7325	0.00141864	34.9295
1211	rs4642211	IPF	M02132.metal.pos.txt.gz	C	T	C	T	-0.1422	0	0.3539	0.3612	0.0285606	0.0017	6.39523e-07	0.9789	24589	7325	0.00100713	24.7873
1212	rs6560861	IPF	M02132.metal.pos.txt.gz	G	A	G	A	0.1636	-0.0008	0.1928	0.1834	0.0346732	0.0025	2.3778e-06	0.7353	24589	7325	0.000904574	22.2609
1213	rs6786378	IPF	M02132.metal.pos.txt.gz	C	A	C	A	-0.1786	-0.0015	0.159	0.1467	0.0384673	0.0025	3.43537e-06	0.5558	24589	7325	0.000875909	21.5549
1214	rs7100920	IPF	M02132.metal.pos.txt.gz	C	T	C	T	-0.1744	0.0036	0.4612	0.5074	0.0272959	0.0017	1.66726e-10	0.03847	24589	7325	0.00165743	40.8189
1215	rs7138541	IPF	M02132.metal.pos.txt.gz	G	A	G	A	-0.1298	0.0029	0.3986	0.406	0.0280337	0.0017	3.65408e-06	0.08588	24589	7325	0.000871104	21.4365
1216	rs751709	IPF	M02132.metal.pos.txt.gz	G	T	G	T	0.4781	0.0204	0.9761	0.9814	0.100858	0.0176	2.13372e-06	0.2465	24589	1753	0.000913018	22.4689
1217	rs757918	IPF	M02132.metal.pos.txt.gz	C	T	C	T	0.1254	0.0024	0.4503	0.4994	0.0272959	0.0017	4.34644e-06	0.1605	24589	7325	0.000857601	21.1039
1218	rs9860874	IPF	M02132.metal.pos.txt.gz	C	A	C	A	-0.2572	0.0013	0.7356	0.746	0.0298253	0.0023	6.49092e-18	0.5818	24589	7325	0.00301523	74.3596
1219	rs10967305	IPF	M02137.metal.pos.txt.gz	C	T	C	T	-0.1437	0.0001	0.4135	0.4075	0.0276121	0.0035	1.94795e-07	0.9786	24589	6252	0.00110026	27.0819
1220	rs11073517	IPF	M02137.metal.pos.txt.gz	C	T	C	T	-0.175	0.0001	0.7296	0.6774	0.0288768	0.0043	1.35927e-09	0.9739	24589	6252	0.00149138	36.7234
1221	rs1123573	IPF	M02137.metal.pos.txt.gz	G	A	G	A	-0.1327	0.0053	0.3867	0.3897	0.0282445	0.0036	2.62378e-06	0.1398	24589	6252	0.000896902	22.0719
1222	rs11788059	IPF	M02137.metal.pos.txt.gz	C	T	C	T	0.1547	0.0027	0.3648	0.3244	0.0283498	0.0043	4.84737e-08	0.5256	24589	6252	0.00120952	29.7745
1223	rs1214759	IPF	M02137.metal.pos.txt.gz	G	A	G	A	0.1652	0.0009	0.6292	0.6737	0.0292984	0.0042	1.71495e-08	0.8271	24589	6252	0.00129131	31.7906
1224	rs12610495	IPF	M02137.metal.pos.txt.gz	G	A	G	A	0.2495	-0.001	0.2942	0.292	0.0304576	0.006	2.57551e-16	0.8676	23506	5077	0.00284664	67.0983
1225	rs12753958	IPF	M02137.metal.pos.txt.gz	G	T	G	T	-0.1753	0.0081	0.8151	0.8549	0.0349894	0.0057	5.44049e-07	0.1556	24589	6252	0.00101978	25.099
1226	rs2076295	IPF	M02137.metal.pos.txt.gz	G	T	G	T	0.3966	-0.008	0.4145	0.4458	0.0270852	0.0036	1.49989e-48	0.02568	24589	6252	0.00864432	214.391
1227	rs2197025	IPF	M02137.metal.pos.txt.gz	G	A	G	A	-0.144	0.0061	0.4483	0.4876	0.0276121	0.0042	1.83716e-07	0.1523	24589	6252	0.00110485	27.1951
1228	rs2609259	IPF	M02137.metal.pos.txt.gz	C	A	C	A	-0.2642	0.0039	0.7654	0.7839	0.0316169	0.0044	6.4725e-17	0.372	24589	6252	0.00283174	69.8218
1229	rs2967465	IPF	M02137.metal.pos.txt.gz	G	A	G	A	-0.2037	-0.0067	0.1113	0.1317	0.0407858	0.0054	5.90247e-07	0.211	24589	6252	0.0010134	24.9418
1230	rs3808803	IPF	M02137.metal.pos.txt.gz	C	T	C	T	-0.1278	0.0012	0.5358	0.5531	0.0272959	0.0035	2.8407e-06	0.7435	24589	6252	0.000890712	21.9195
1231	rs4233306	IPF	M02137.metal.pos.txt.gz	C	T	C	T	0.2068	0.0069	0.7913	0.8023	0.0349894	0.0045	3.41357e-09	0.1191	24589	6252	0.00141864	34.9295
1232	rs4642211	IPF	M02137.metal.pos.txt.gz	C	T	C	T	-0.1422	-0.0033	0.3539	0.3617	0.0285606	0.0042	6.39523e-07	0.4301	24589	6252	0.00100713	24.7873
1233	rs6560861	IPF	M02137.metal.pos.txt.gz	G	A	G	A	0.1636	0.0015	0.1928	0.1832	0.0346732	0.0052	2.3778e-06	0.7774	24589	6252	0.000904574	22.2609
1234	rs6786378	IPF	M02137.metal.pos.txt.gz	C	A	C	A	-0.1786	-0.008	0.159	0.1494	0.0384673	0.0052	3.43537e-06	0.1273	24589	6252	0.000875909	21.5549
1235	rs7100920	IPF	M02137.metal.pos.txt.gz	C	T	C	T	-0.1744	-0.0018	0.4612	0.5071	0.0272959	0.0036	1.66726e-10	0.6073	24589	6252	0.00165743	40.8189
1236	rs7138541	IPF	M02137.metal.pos.txt.gz	G	A	G	A	-0.1298	0.0025	0.3986	0.4025	0.0280337	0.0035	3.65408e-06	0.4814	24589	6252	0.000871104	21.4365
1237	rs751709	IPF	M02137.metal.pos.txt.gz	G	T	G	T	0.4781	0.0409	0.9761	0.9813	0.100858	0.0404	2.13372e-06	0.3118	24589	1175	0.000913018	22.4689
1238	rs757918	IPF	M02137.metal.pos.txt.gz	C	T	C	T	0.1254	-0.0001	0.4503	0.5004	0.0272959	0.0035	4.34644e-06	0.9669	24589	6252	0.000857601	21.1039
1239	rs9860874	IPF	M02137.metal.pos.txt.gz	C	A	C	A	-0.2572	0.0009	0.7356	0.7473	0.0298253	0.0043	6.49092e-18	0.8295	24589	6252	0.00301523	74.3596
1240	rs10967305	IPF	M02342.metal.pos.txt.gz	C	T	C	T	-0.1437	-0.0012	0.4135	0.4085	0.0276121	0.0032	1.94795e-07	0.7139	24589	5791	0.00110026	27.0819
1241	rs11073517	IPF	M02342.metal.pos.txt.gz	C	T	C	T	-0.175	0.0084	0.7296	0.6812	0.0288768	0.0038	1.35927e-09	0.0288	24589	5791	0.00149138	36.7234
1242	rs1123573	IPF	M02342.metal.pos.txt.gz	G	A	G	A	-0.1327	-0.0054	0.3867	0.3914	0.0282445	0.0033	2.62378e-06	0.09475	24589	5791	0.000896902	22.0719
1243	rs11788059	IPF	M02342.metal.pos.txt.gz	C	T	C	T	0.1547	-0.0061	0.3648	0.323	0.0283498	0.0038	4.84737e-08	0.1079	24589	5791	0.00120952	29.7745
1244	rs1214759	IPF	M02342.metal.pos.txt.gz	G	A	G	A	0.1652	-0.0026	0.6292	0.6684	0.0292984	0.0038	1.71495e-08	0.4854	24589	5791	0.00129131	31.7906
1245	rs12610495	IPF	M02342.metal.pos.txt.gz	G	A	G	A	0.2495	0.002	0.2942	0.292	0.0304576	0.006	2.57551e-16	0.7389	23506	4050	0.00284664	67.0983
1246	rs12753958	IPF	M02342.metal.pos.txt.gz	G	T	G	T	-0.1753	-0.0083	0.8151	0.8445	0.0349894	0.005	5.44049e-07	0.09846	24589	5791	0.00101978	25.099
1247	rs2076295	IPF	M02342.metal.pos.txt.gz	G	T	G	T	0.3966	0.0022	0.4145	0.4484	0.0270852	0.0033	1.49989e-48	0.4986	24589	5791	0.00864432	214.391
1248	rs2197025	IPF	M02342.metal.pos.txt.gz	G	A	G	A	-0.144	-0.0004	0.4483	0.4884	0.0276121	0.0038	1.83716e-07	0.9235	24589	5791	0.00110485	27.1951
1249	rs2609259	IPF	M02342.metal.pos.txt.gz	C	A	C	A	-0.2642	-0.002	0.7654	0.7825	0.0316169	0.004	6.4725e-17	0.6109	24589	5791	0.00283174	69.8218
1250	rs2967465	IPF	M02342.metal.pos.txt.gz	G	A	G	A	-0.2037	-0.0056	0.1113	0.1276	0.0407858	0.0055	5.90247e-07	0.3074	24589	5791	0.0010134	24.9418
1251	rs3808803	IPF	M02342.metal.pos.txt.gz	C	T	C	T	-0.1278	-0.0012	0.5358	0.5505	0.0272959	0.0032	2.8407e-06	0.7202	24589	5791	0.000890712	21.9195
1252	rs4233306	IPF	M02342.metal.pos.txt.gz	C	T	C	T	0.2068	0.0013	0.7913	0.8015	0.0349894	0.0041	3.41357e-09	0.7505	24589	5791	0.00141864	34.9295
1253	rs4642211	IPF	M02342.metal.pos.txt.gz	C	T	C	T	-0.1422	-0.0032	0.3539	0.3537	0.0285606	0.0038	6.39523e-07	0.3985	24589	5791	0.00100713	24.7873
1254	rs6560861	IPF	M02342.metal.pos.txt.gz	G	A	G	A	0.1636	-0.0041	0.1928	0.1834	0.0346732	0.0047	2.3778e-06	0.3836	24589	5791	0.000904574	22.2609
1255	rs6786378	IPF	M02342.metal.pos.txt.gz	C	A	C	A	-0.1786	-0.0044	0.159	0.1464	0.0384673	0.0052	3.43537e-06	0.4031	24589	5791	0.000875909	21.5549
1256	rs7100920	IPF	M02342.metal.pos.txt.gz	C	T	C	T	-0.1744	-0.0007	0.4612	0.5075	0.0272959	0.0033	1.66726e-10	0.8271	24589	5791	0.00165743	40.8189
1257	rs7138541	IPF	M02342.metal.pos.txt.gz	G	A	G	A	-0.1298	-0.0061	0.3986	0.4148	0.0280337	0.0037	3.65408e-06	0.1012	24589	5791	0.000871104	21.4365
1258	rs751709	IPF	M02342.metal.pos.txt.gz	G	T	G	T	0.4781	-0.0017	0.9761	0.9811	0.100858	0.029	2.13372e-06	0.9536	24589	1741	0.000913018	22.4689
1259	rs757918	IPF	M02342.metal.pos.txt.gz	C	T	C	T	0.1254	0.0007	0.4503	0.498	0.0272959	0.0033	4.34644e-06	0.8411	24589	5791	0.000857601	21.1039
1260	rs9860874	IPF	M02342.metal.pos.txt.gz	C	A	C	A	-0.2572	0.0056	0.7356	0.7464	0.0298253	0.0039	6.49092e-18	0.1509	24589	5791	0.00301523	74.3596
1261	rs10967305	IPF	M02730.metal.pos.txt.gz	C	T	C	T	-0.1437	-0.0024	0.4135	0.409	0.0276121	0.0021	1.94795e-07	0.2406	24589	7226	0.00110026	27.0819
1262	rs11073517	IPF	M02730.metal.pos.txt.gz	C	T	C	T	-0.175	0.0005	0.7296	0.6834	0.0288768	0.0022	1.35927e-09	0.8277	24589	7226	0.00149138	36.7234
1263	rs1123573	IPF	M02730.metal.pos.txt.gz	G	A	G	A	-0.1327	0.0028	0.3867	0.3933	0.0282445	0.0021	2.62378e-06	0.1789	24589	7226	0.000896902	22.0719
1264	rs11788059	IPF	M02730.metal.pos.txt.gz	C	T	C	T	0.1547	0.0031	0.3648	0.3228	0.0283498	0.0021	4.84737e-08	0.1484	24589	7226	0.00120952	29.7745
1265	rs1214759	IPF	M02730.metal.pos.txt.gz	G	A	G	A	0.1652	-0.0004	0.6292	0.6665	0.0292984	0.0021	1.71495e-08	0.8456	24589	7226	0.00129131	31.7906
1266	rs12610495	IPF	M02730.metal.pos.txt.gz	G	A	G	A	0.2495	-0.002	0.2942	0.292	0.0304576	0.003	2.57551e-16	0.505	23506	5460	0.00284664	67.0983
1267	rs12753958	IPF	M02730.metal.pos.txt.gz	G	T	G	T	-0.1753	-0.0006	0.8151	0.8335	0.0349894	0.003	5.44049e-07	0.834	24589	7226	0.00101978	25.099
1268	rs2076295	IPF	M02730.metal.pos.txt.gz	G	T	G	T	0.3966	0.0028	0.4145	0.4505	0.0270852	0.0021	1.49989e-48	0.1954	24589	7226	0.00864432	214.391
1269	rs2197025	IPF	M02730.metal.pos.txt.gz	G	A	G	A	-0.144	-0.0039	0.4483	0.4881	0.0276121	0.0022	1.83716e-07	0.06869	24589	7226	0.00110485	27.1951
1270	rs2609259	IPF	M02730.metal.pos.txt.gz	C	A	C	A	-0.2642	0.0008	0.7654	0.7822	0.0316169	0.0023	6.4725e-17	0.7334	24589	7226	0.00283174	69.8218
1271	rs2967465	IPF	M02730.metal.pos.txt.gz	G	A	G	A	-0.2037	-0.0037	0.1113	0.1265	0.0407858	0.003	5.90247e-07	0.2245	24589	7226	0.0010134	24.9418
1272	rs3808803	IPF	M02730.metal.pos.txt.gz	C	T	C	T	-0.1278	0.0019	0.5358	0.5485	0.0272959	0.0021	2.8407e-06	0.3617	24589	7226	0.000890712	21.9195
1273	rs4233306	IPF	M02730.metal.pos.txt.gz	C	T	C	T	0.2068	0.0011	0.7913	0.8018	0.0349894	0.0023	3.41357e-09	0.6232	24589	7226	0.00141864	34.9295
1274	rs4642211	IPF	M02730.metal.pos.txt.gz	C	T	C	T	-0.1422	0.0023	0.3539	0.351	0.0285606	0.0021	6.39523e-07	0.2712	24589	7226	0.00100713	24.7873
1275	rs6560861	IPF	M02730.metal.pos.txt.gz	G	A	G	A	0.1636	0.0006	0.1928	0.1831	0.0346732	0.0028	2.3778e-06	0.8382	24589	7226	0.000904574	22.2609
1276	rs6786378	IPF	M02730.metal.pos.txt.gz	C	A	C	A	-0.1786	0.0025	0.159	0.146	0.0384673	0.0029	3.43537e-06	0.3878	24589	7226	0.000875909	21.5549
1277	rs7100920	IPF	M02730.metal.pos.txt.gz	C	T	C	T	-0.1744	0.0004	0.4612	0.5108	0.0272959	0.0021	1.66726e-10	0.8521	24589	7226	0.00165743	40.8189
1278	rs7138541	IPF	M02730.metal.pos.txt.gz	G	A	G	A	-0.1298	0.0036	0.3986	0.4187	0.0280337	0.0021	3.65408e-06	0.08796	24589	7226	0.000871104	21.4365
1279	rs751709	IPF	M02730.metal.pos.txt.gz	G	T	G	T	0.4781	0.0146	0.9761	0.9813	0.100858	0.0154	2.13372e-06	0.3409	24589	1766	0.000913018	22.4689
1280	rs757918	IPF	M02730.metal.pos.txt.gz	C	T	C	T	0.1254	-0.0059	0.4503	0.4969	0.0272959	0.0021	4.34644e-06	0.004949	24589	7226	0.000857601	21.1039
1281	rs9860874	IPF	M02730.metal.pos.txt.gz	C	A	C	A	-0.2572	0.0018	0.7356	0.7455	0.0298253	0.0022	6.49092e-18	0.4222	24589	7226	0.00301523	74.3596
1282	rs10967305	IPF	M02734.metal.pos.txt.gz	C	T	C	T	-0.1437	-0.0016	0.4135	0.408	0.0276121	0.0017	1.94795e-07	0.3621	24589	7037	0.00110026	27.0819
1283	rs11073517	IPF	M02734.metal.pos.txt.gz	C	T	C	T	-0.175	-0.004	0.7296	0.6739	0.0288768	0.0018	1.35927e-09	0.02403	24589	7037	0.00149138	36.7234
1284	rs1123573	IPF	M02734.metal.pos.txt.gz	G	A	G	A	-0.1327	0.0011	0.3867	0.3902	0.0282445	0.0017	2.62378e-06	0.5168	24589	7037	0.000896902	22.0719
1285	rs11788059	IPF	M02734.metal.pos.txt.gz	C	T	C	T	0.1547	-0.0017	0.3648	0.326	0.0283498	0.0018	4.84737e-08	0.3299	24589	7037	0.00120952	29.7745
1286	rs1214759	IPF	M02734.metal.pos.txt.gz	G	A	G	A	0.1652	-0.0011	0.6292	0.6739	0.0292984	0.0017	1.71495e-08	0.5165	24589	7037	0.00129131	31.7906
1287	rs12610495	IPF	M02734.metal.pos.txt.gz	G	A	G	A	0.2495	-0.002	0.2942	0.292	0.0304576	0.003	2.57551e-16	0.505	23506	5370	0.00284664	67.0983
1288	rs12753958	IPF	M02734.metal.pos.txt.gz	G	T	G	T	-0.1753	0.0013	0.8151	0.8476	0.0349894	0.003	5.44049e-07	0.6711	24589	7037	0.00101978	25.099
1289	rs2076295	IPF	M02734.metal.pos.txt.gz	G	T	G	T	0.3966	-0.0014	0.4145	0.4463	0.0270852	0.0018	1.49989e-48	0.4288	24589	7037	0.00864432	214.391
1290	rs2197025	IPF	M02734.metal.pos.txt.gz	G	A	G	A	-0.144	-0.0014	0.4483	0.4875	0.0276121	0.0023	1.83716e-07	0.5391	24589	7037	0.00110485	27.1951
1291	rs2609259	IPF	M02734.metal.pos.txt.gz	C	A	C	A	-0.2642	-0.0026	0.7654	0.7825	0.0316169	0.0024	6.4725e-17	0.2812	24589	7037	0.00283174	69.8218
1292	rs2967465	IPF	M02734.metal.pos.txt.gz	G	A	G	A	-0.2037	-0.0052	0.1113	0.1314	0.0407858	0.0026	5.90247e-07	0.04877	24589	7037	0.0010134	24.9418
1293	rs3808803	IPF	M02734.metal.pos.txt.gz	C	T	C	T	-0.1278	-0.0006	0.5358	0.5519	0.0272959	0.0017	2.8407e-06	0.7269	24589	7037	0.000890712	21.9195
1294	rs4233306	IPF	M02734.metal.pos.txt.gz	C	T	C	T	0.2068	0.0032	0.7913	0.8022	0.0349894	0.0025	3.41357e-09	0.2035	24589	7037	0.00141864	34.9295
1295	rs4642211	IPF	M02734.metal.pos.txt.gz	C	T	C	T	-0.1422	-0.002	0.3539	0.3617	0.0285606	0.0018	6.39523e-07	0.2523	24589	7037	0.00100713	24.7873
1296	rs6560861	IPF	M02734.metal.pos.txt.gz	G	A	G	A	0.1636	0.0029	0.1928	0.1832	0.0346732	0.0025	2.3778e-06	0.2616	24589	7037	0.000904574	22.2609
1297	rs6786378	IPF	M02734.metal.pos.txt.gz	C	A	C	A	-0.1786	-0.001	0.159	0.1467	0.0384673	0.0026	3.43537e-06	0.6877	24589	7037	0.000875909	21.5549
1298	rs7100920	IPF	M02734.metal.pos.txt.gz	C	T	C	T	-0.1744	0	0.4612	0.5069	0.0272959	0.0017	1.66726e-10	0.9921	24589	7037	0.00165743	40.8189
1299	rs7138541	IPF	M02734.metal.pos.txt.gz	G	A	G	A	-0.1298	-0.0023	0.3986	0.4045	0.0280337	0.0017	3.65408e-06	0.1898	24589	7037	0.000871104	21.4365
1300	rs751709	IPF	M02734.metal.pos.txt.gz	G	T	G	T	0.4781	0.0124	0.9761	0.9812	0.100858	0.0182	2.13372e-06	0.4979	24589	1667	0.000913018	22.4689
1301	rs757918	IPF	M02734.metal.pos.txt.gz	C	T	C	T	0.1254	0.0002	0.4503	0.4992	0.0272959	0.0017	4.34644e-06	0.9261	24589	7037	0.000857601	21.1039
1302	rs9860874	IPF	M02734.metal.pos.txt.gz	C	A	C	A	-0.2572	-0.0063	0.7356	0.7464	0.0298253	0.0024	6.49092e-18	0.00824	24589	7037	0.00301523	74.3596
1303	rs10967305	IPF	M03127.metal.pos.txt.gz	C	T	C	T	-0.1437	0.0029	0.4135	0.4081	0.0276121	0.0024	1.94795e-07	0.2334	24589	6941	0.00110026	27.0819
1304	rs11073517	IPF	M03127.metal.pos.txt.gz	C	T	C	T	-0.175	0.0002	0.7296	0.682	0.0288768	0.003	1.35927e-09	0.9379	24589	6941	0.00149138	36.7234
1305	rs1123573	IPF	M03127.metal.pos.txt.gz	G	A	G	A	-0.1327	0.0017	0.3867	0.3908	0.0282445	0.0024	2.62378e-06	0.4842	24589	6941	0.000896902	22.0719
1306	rs11788059	IPF	M03127.metal.pos.txt.gz	C	T	C	T	0.1547	-0.0035	0.3648	0.3232	0.0283498	0.0029	4.84737e-08	0.2281	24589	6941	0.00120952	29.7745
1307	rs1214759	IPF	M03127.metal.pos.txt.gz	G	A	G	A	0.1652	-0.0064	0.6292	0.6669	0.0292984	0.0029	1.71495e-08	0.02886	24589	6941	0.00129131	31.7906
1308	rs12610495	IPF	M03127.metal.pos.txt.gz	G	A	G	A	0.2495	0.007	0.2942	0.292	0.0304576	0.004	2.57551e-16	0.08012	23506	5196	0.00284664	67.0983
1309	rs12753958	IPF	M03127.metal.pos.txt.gz	G	T	G	T	-0.1753	-0.0067	0.8151	0.8385	0.0349894	0.004	5.44049e-07	0.09436	24589	6941	0.00101978	25.099
1310	rs2076295	IPF	M03127.metal.pos.txt.gz	G	T	G	T	0.3966	0.0061	0.4145	0.4469	0.0270852	0.0025	1.49989e-48	0.01368	24589	6941	0.00864432	214.391
1311	rs2197025	IPF	M03127.metal.pos.txt.gz	G	A	G	A	-0.144	0.001	0.4483	0.4882	0.0276121	0.003	1.83716e-07	0.7456	24589	6941	0.00110485	27.1951
1312	rs2609259	IPF	M03127.metal.pos.txt.gz	C	A	C	A	-0.2642	0.0053	0.7654	0.7819	0.0316169	0.0031	6.4725e-17	0.08744	24589	6941	0.00283174	69.8218
1313	rs2967465	IPF	M03127.metal.pos.txt.gz	G	A	G	A	-0.2037	-0.0025	0.1113	0.1278	0.0407858	0.004	5.90247e-07	0.5323	24589	6941	0.0010134	24.9418
1314	rs3808803	IPF	M03127.metal.pos.txt.gz	C	T	C	T	-0.1278	0.0016	0.5358	0.5503	0.0272959	0.0024	2.8407e-06	0.5133	24589	6941	0.000890712	21.9195
1315	rs4233306	IPF	M03127.metal.pos.txt.gz	C	T	C	T	0.2068	-0.0025	0.7913	0.8018	0.0349894	0.0032	3.41357e-09	0.4302	24589	6941	0.00141864	34.9295
1316	rs4642211	IPF	M03127.metal.pos.txt.gz	C	T	C	T	-0.1422	-0.0013	0.3539	0.3522	0.0285606	0.0029	6.39523e-07	0.6526	24589	6941	0.00100713	24.7873
1317	rs6560861	IPF	M03127.metal.pos.txt.gz	G	A	G	A	0.1636	0.0017	0.1928	0.1831	0.0346732	0.0033	2.3778e-06	0.6141	24589	6941	0.000904574	22.2609
1318	rs6786378	IPF	M03127.metal.pos.txt.gz	C	A	C	A	-0.1786	-0.0016	0.159	0.1461	0.0384673	0.0038	3.43537e-06	0.6656	24589	6941	0.000875909	21.5549
1319	rs7100920	IPF	M03127.metal.pos.txt.gz	C	T	C	T	-0.1744	0.0052	0.4612	0.5082	0.0272959	0.0024	1.66726e-10	0.0321	24589	6941	0.00165743	40.8189
1320	rs7138541	IPF	M03127.metal.pos.txt.gz	G	A	G	A	-0.1298	0.0002	0.3986	0.4098	0.0280337	0.0024	3.65408e-06	0.9295	24589	6941	0.000871104	21.4365
1321	rs751709	IPF	M03127.metal.pos.txt.gz	G	T	G	T	0.4781	-0.027	0.9761	0.9812	0.100858	0.0217	2.13372e-06	0.2131	24589	1745	0.000913018	22.4689
1322	rs757918	IPF	M03127.metal.pos.txt.gz	C	T	C	T	0.1254	-0.0018	0.4503	0.4982	0.0272959	0.0024	4.34644e-06	0.4503	24589	6941	0.000857601	21.1039
1323	rs9860874	IPF	M03127.metal.pos.txt.gz	C	A	C	A	-0.2572	-0.0031	0.7356	0.7453	0.0298253	0.003	6.49092e-18	0.308	24589	6941	0.00301523	74.3596
1324	rs10967305	IPF	M03141.metal.pos.txt.gz	C	T	C	T	-0.1437	-0.0024	0.4135	0.4082	0.0276121	0.0023	1.94795e-07	0.2973	24589	7357	0.00110026	27.0819
1325	rs11073517	IPF	M03141.metal.pos.txt.gz	C	T	C	T	-0.175	0.0013	0.7296	0.6787	0.0288768	0.0024	1.35927e-09	0.5875	24589	7357	0.00149138	36.7234
1326	rs1123573	IPF	M03141.metal.pos.txt.gz	G	A	G	A	-0.1327	0.0013	0.3867	0.3916	0.0282445	0.0024	2.62378e-06	0.5938	24589	7357	0.000896902	22.0719
1327	rs11788059	IPF	M03141.metal.pos.txt.gz	C	T	C	T	0.1547	-0.0023	0.3648	0.324	0.0283498	0.0024	4.84737e-08	0.3439	24589	7357	0.00120952	29.7745
1328	rs1214759	IPF	M03141.metal.pos.txt.gz	G	A	G	A	0.1652	-0.0023	0.6292	0.6701	0.0292984	0.0024	1.71495e-08	0.3295	24589	7357	0.00129131	31.7906
1329	rs12610495	IPF	M03141.metal.pos.txt.gz	G	A	G	A	0.2495	0.001	0.2942	0.292	0.0304576	0.003	2.57551e-16	0.7389	23506	5598	0.00284664	67.0983
1330	rs12753958	IPF	M03141.metal.pos.txt.gz	G	T	G	T	-0.1753	0.0015	0.8151	0.8516	0.0349894	0.0031	5.44049e-07	0.6209	24589	7357	0.00101978	25.099
1331	rs2076295	IPF	M03141.metal.pos.txt.gz	G	T	G	T	0.3966	0.0002	0.4145	0.4482	0.0270852	0.0024	1.49989e-48	0.9501	24589	7357	0.00864432	214.391
1332	rs2197025	IPF	M03141.metal.pos.txt.gz	G	A	G	A	-0.144	0.0004	0.4483	0.4882	0.0276121	0.0024	1.83716e-07	0.8598	24589	7357	0.00110485	27.1951
1333	rs2609259	IPF	M03141.metal.pos.txt.gz	C	A	C	A	-0.2642	0.0036	0.7654	0.7825	0.0316169	0.0025	6.4725e-17	0.1536	24589	7357	0.00283174	69.8218
1334	rs2967465	IPF	M03141.metal.pos.txt.gz	G	A	G	A	-0.2037	-0.0013	0.1113	0.1295	0.0407858	0.0033	5.90247e-07	0.6927	24589	7357	0.0010134	24.9418
1335	rs3808803	IPF	M03141.metal.pos.txt.gz	C	T	C	T	-0.1278	0.0028	0.5358	0.55	0.0272959	0.0024	2.8407e-06	0.2424	24589	7357	0.000890712	21.9195
1336	rs4233306	IPF	M03141.metal.pos.txt.gz	C	T	C	T	0.2068	0.0034	0.7913	0.8017	0.0349894	0.0026	3.41357e-09	0.1864	24589	7357	0.00141864	34.9295
1337	rs4642211	IPF	M03141.metal.pos.txt.gz	C	T	C	T	-0.1422	0.0008	0.3539	0.3568	0.0285606	0.0024	6.39523e-07	0.7327	24589	7357	0.00100713	24.7873
1338	rs6560861	IPF	M03141.metal.pos.txt.gz	G	A	G	A	0.1636	-0.0036	0.1928	0.1831	0.0346732	0.0026	2.3778e-06	0.1674	24589	7357	0.000904574	22.2609
1339	rs6786378	IPF	M03141.metal.pos.txt.gz	C	A	C	A	-0.1786	0.0008	0.159	0.1467	0.0384673	0.0032	3.43537e-06	0.8141	24589	7357	0.000875909	21.5549
1340	rs7100920	IPF	M03141.metal.pos.txt.gz	C	T	C	T	-0.1744	0.0008	0.4612	0.5089	0.0272959	0.0024	1.66726e-10	0.7424	24589	7357	0.00165743	40.8189
1341	rs7138541	IPF	M03141.metal.pos.txt.gz	G	A	G	A	-0.1298	-0.0007	0.3986	0.4115	0.0280337	0.0024	3.65408e-06	0.7702	24589	7357	0.000871104	21.4365
1342	rs751709	IPF	M03141.metal.pos.txt.gz	G	T	G	T	0.4781	-0.0102	0.9761	0.9814	0.100858	0.0204	2.13372e-06	0.6167	24589	1759	0.000913018	22.4689
1343	rs757918	IPF	M03141.metal.pos.txt.gz	C	T	C	T	0.1254	0.0022	0.4503	0.4984	0.0272959	0.0024	4.34644e-06	0.3479	24589	7357	0.000857601	21.1039
1344	rs9860874	IPF	M03141.metal.pos.txt.gz	C	A	C	A	-0.2572	0.0003	0.7356	0.7466	0.0298253	0.0025	6.49092e-18	0.8885	24589	7357	0.00301523	74.3596
1345	rs10967305	IPF	M03147.metal.pos.txt.gz	C	T	C	T	-0.1437	0	0.4135	0.4081	0.0276121	0.0029	1.94795e-07	0.9889	24589	6515	0.00110026	27.0819
1346	rs11073517	IPF	M03147.metal.pos.txt.gz	C	T	C	T	-0.175	0.0005	0.7296	0.6848	0.0288768	0.003	1.35927e-09	0.8723	24589	6515	0.00149138	36.7234
1347	rs1123573	IPF	M03147.metal.pos.txt.gz	G	A	G	A	-0.1327	-0.0006	0.3867	0.3929	0.0282445	0.0029	2.62378e-06	0.8364	24589	6515	0.000896902	22.0719
1348	rs11788059	IPF	M03147.metal.pos.txt.gz	C	T	C	T	0.1547	-0.0016	0.3648	0.3229	0.0283498	0.003	4.84737e-08	0.595	24589	6515	0.00120952	29.7745
1349	rs1214759	IPF	M03147.metal.pos.txt.gz	G	A	G	A	0.1652	-0.0036	0.6292	0.6664	0.0292984	0.003	1.71495e-08	0.2215	24589	6515	0.00129131	31.7906
1350	rs12610495	IPF	M03147.metal.pos.txt.gz	G	A	G	A	0.2495	-0.002	0.2942	0.292	0.0304576	0.0042	2.57551e-16	0.6368	23506	4767	0.00284664	67.0983
1351	rs12753958	IPF	M03147.metal.pos.txt.gz	G	T	G	T	-0.1753	-0.0056	0.8151	0.8359	0.0349894	0.004	5.44049e-07	0.1651	24589	6515	0.00101978	25.099
1352	rs2076295	IPF	M03147.metal.pos.txt.gz	G	T	G	T	0.3966	-0.0038	0.4145	0.4503	0.0270852	0.003	1.49989e-48	0.2079	24589	6515	0.00864432	214.391
1353	rs2197025	IPF	M03147.metal.pos.txt.gz	G	A	G	A	-0.144	-0.0008	0.4483	0.4878	0.0276121	0.003	1.83716e-07	0.7945	24589	6515	0.00110485	27.1951
1354	rs2609259	IPF	M03147.metal.pos.txt.gz	C	A	C	A	-0.2642	-0.0008	0.7654	0.7825	0.0316169	0.0032	6.4725e-17	0.7995	24589	6515	0.00283174	69.8218
1355	rs2967465	IPF	M03147.metal.pos.txt.gz	G	A	G	A	-0.2037	0.0057	0.1113	0.1271	0.0407858	0.0041	5.90247e-07	0.1616	24589	6515	0.0010134	24.9418
1356	rs3808803	IPF	M03147.metal.pos.txt.gz	C	T	C	T	-0.1278	0.0008	0.5358	0.5489	0.0272959	0.0029	2.8407e-06	0.7955	24589	6515	0.000890712	21.9195
1357	rs4233306	IPF	M03147.metal.pos.txt.gz	C	T	C	T	0.2068	-0.0007	0.7913	0.8014	0.0349894	0.0032	3.41357e-09	0.8181	24589	6515	0.00141864	34.9295
1358	rs4642211	IPF	M03147.metal.pos.txt.gz	C	T	C	T	-0.1422	0.0014	0.3539	0.3503	0.0285606	0.003	6.39523e-07	0.6435	24589	6515	0.00100713	24.7873
1359	rs6560861	IPF	M03147.metal.pos.txt.gz	G	A	G	A	0.1636	0.0043	0.1928	0.1832	0.0346732	0.0038	2.3778e-06	0.2571	24589	6515	0.000904574	22.2609
1360	rs6786378	IPF	M03147.metal.pos.txt.gz	C	A	C	A	-0.1786	-0.0035	0.159	0.1462	0.0384673	0.0039	3.43537e-06	0.3606	24589	6515	0.000875909	21.5549
1361	rs7100920	IPF	M03147.metal.pos.txt.gz	C	T	C	T	-0.1744	0.0016	0.4612	0.5111	0.0272959	0.0029	1.66726e-10	0.5951	24589	6515	0.00165743	40.8189
1362	rs7138541	IPF	M03147.metal.pos.txt.gz	G	A	G	A	-0.1298	-0.0048	0.3986	0.4204	0.0280337	0.0029	3.65408e-06	0.09833	24589	6515	0.000871104	21.4365
1363	rs751709	IPF	M03147.metal.pos.txt.gz	G	T	G	T	0.4781	0.0281	0.9761	0.9813	0.100858	0.0212	2.13372e-06	0.185	24589	1748	0.000913018	22.4689
1364	rs757918	IPF	M03147.metal.pos.txt.gz	C	T	C	T	0.1254	0.0011	0.4503	0.4963	0.0272959	0.0029	4.34644e-06	0.6996	24589	6515	0.000857601	21.1039
1365	rs9860874	IPF	M03147.metal.pos.txt.gz	C	A	C	A	-0.2572	0.0036	0.7356	0.7456	0.0298253	0.0031	6.49092e-18	0.2455	24589	6515	0.00301523	74.3596
1366	rs10967305	IPF	M11438.metal.pos.txt.gz	C	T	C	T	-0.1437	-0.0015	0.4135	0.4083	0.0276121	0.0012	1.94795e-07	0.2117	24589	7341	0.00110026	27.0819
1367	rs11073517	IPF	M11438.metal.pos.txt.gz	C	T	C	T	-0.175	0.0006	0.7296	0.6754	0.0288768	0.0013	1.35927e-09	0.6205	24589	7341	0.00149138	36.7234
1368	rs1123573	IPF	M11438.metal.pos.txt.gz	G	A	G	A	-0.1327	-0.0002	0.3867	0.3906	0.0282445	0.0013	2.62378e-06	0.8775	24589	7341	0.000896902	22.0719
1369	rs11788059	IPF	M11438.metal.pos.txt.gz	C	T	C	T	0.1547	0.0016	0.3648	0.3252	0.0283498	0.0013	4.84737e-08	0.1943	24589	7341	0.00120952	29.7745
1370	rs1214759	IPF	M11438.metal.pos.txt.gz	G	A	G	A	0.1652	0.0008	0.6292	0.6725	0.0292984	0.0013	1.71495e-08	0.5394	24589	7341	0.00129131	31.7906
1371	rs12610495	IPF	M11438.metal.pos.txt.gz	G	A	G	A	0.2495	-0.005	0.2942	0.292	0.0304576	0.003	2.57551e-16	0.09175	23506	5577	0.00284664	67.0983
1372	rs12753958	IPF	M11438.metal.pos.txt.gz	G	T	G	T	-0.1753	-0.0006	0.8151	0.844	0.0349894	0.0021	5.44049e-07	0.7922	24589	7341	0.00101978	25.099
1373	rs2076295	IPF	M11438.metal.pos.txt.gz	G	T	G	T	0.3966	0.0003	0.4145	0.4466	0.0270852	0.0013	1.49989e-48	0.8354	24589	7341	0.00864432	214.391
1374	rs2197025	IPF	M11438.metal.pos.txt.gz	G	A	G	A	-0.144	0	0.4483	0.488	0.0276121	0.0013	1.83716e-07	0.9902	24589	7341	0.00110485	27.1951
1375	rs2609259	IPF	M11438.metal.pos.txt.gz	C	A	C	A	-0.2642	0.0013	0.7654	0.7832	0.0316169	0.0013	6.4725e-17	0.3341	24589	7341	0.00283174	69.8218
1376	rs2967465	IPF	M11438.metal.pos.txt.gz	G	A	G	A	-0.2037	-0.0009	0.1113	0.1275	0.0407858	0.0023	5.90247e-07	0.6907	24589	7341	0.0010134	24.9418
1377	rs3808803	IPF	M11438.metal.pos.txt.gz	C	T	C	T	-0.1278	-0.0004	0.5358	0.5515	0.0272959	0.0012	2.8407e-06	0.7351	24589	7341	0.000890712	21.9195
1378	rs4233306	IPF	M11438.metal.pos.txt.gz	C	T	C	T	0.2068	-0.0005	0.7913	0.8014	0.0349894	0.0013	3.41357e-09	0.7209	24589	7341	0.00141864	34.9295
1379	rs4642211	IPF	M11438.metal.pos.txt.gz	C	T	C	T	-0.1422	-0.0005	0.3539	0.3603	0.0285606	0.0013	6.39523e-07	0.6733	24589	7341	0.00100713	24.7873
1380	rs6560861	IPF	M11438.metal.pos.txt.gz	G	A	G	A	0.1636	-0.0019	0.1928	0.1831	0.0346732	0.0022	2.3778e-06	0.3849	24589	7341	0.000904574	22.2609
1381	rs6786378	IPF	M11438.metal.pos.txt.gz	C	A	C	A	-0.1786	0.0013	0.159	0.1464	0.0384673	0.0022	3.43537e-06	0.5445	24589	7341	0.000875909	21.5549
1382	rs7100920	IPF	M11438.metal.pos.txt.gz	C	T	C	T	-0.1744	0.0002	0.4612	0.5072	0.0272959	0.0013	1.66726e-10	0.8453	24589	7341	0.00165743	40.8189
1383	rs7138541	IPF	M11438.metal.pos.txt.gz	G	A	G	A	-0.1298	0.001	0.3986	0.4071	0.0280337	0.0012	3.65408e-06	0.4019	24589	7341	0.000871104	21.4365
1384	rs751709	IPF	M11438.metal.pos.txt.gz	G	T	G	T	0.4781	-0.0086	0.9761	0.9813	0.100858	0.0122	2.13372e-06	0.4795	24589	1764	0.000913018	22.4689
1385	rs757918	IPF	M11438.metal.pos.txt.gz	C	T	C	T	0.1254	-0.0002	0.4503	0.4993	0.0272959	0.0013	4.34644e-06	0.8838	24589	7341	0.000857601	21.1039
1386	rs9860874	IPF	M11438.metal.pos.txt.gz	C	A	C	A	-0.2572	0.0007	0.7356	0.7471	0.0298253	0.0013	6.49092e-18	0.5877	24589	7341	0.00301523	74.3596
1387	rs10967305	IPF	M12017.metal.pos.txt.gz	C	T	C	T	-0.1437	-0.0045	0.4135	0.408	0.0276121	0.0026	1.94795e-07	0.0829	24589	5656	0.00110026	27.0819
1388	rs11073517	IPF	M12017.metal.pos.txt.gz	C	T	C	T	-0.175	0.0006	0.7296	0.6743	0.0288768	0.0027	1.35927e-09	0.8289	24589	5656	0.00149138	36.7234
1389	rs1123573	IPF	M12017.metal.pos.txt.gz	G	A	G	A	-0.1327	-0.0016	0.3867	0.3896	0.0282445	0.0026	2.62378e-06	0.5458	24589	5656	0.000896902	22.0719
1390	rs11788059	IPF	M12017.metal.pos.txt.gz	C	T	C	T	0.1547	0.0007	0.3648	0.3258	0.0283498	0.0026	4.84737e-08	0.7785	24589	5656	0.00120952	29.7745
1391	rs1214759	IPF	M12017.metal.pos.txt.gz	G	A	G	A	0.1652	-0.0067	0.6292	0.6742	0.0292984	0.0026	1.71495e-08	0.0108	24589	5656	0.00129131	31.7906
1392	rs12610495	IPF	M12017.metal.pos.txt.gz	G	A	G	A	0.2495	0.002	0.2942	0.292	0.0304576	0.004	2.57551e-16	0.6171	23506	4204	0.00284664	67.0983
1393	rs12753958	IPF	M12017.metal.pos.txt.gz	G	T	G	T	-0.1753	0.0008	0.8151	0.8558	0.0349894	0.004	5.44049e-07	0.8517	24589	5656	0.00101978	25.099
1394	rs2076295	IPF	M12017.metal.pos.txt.gz	G	T	G	T	0.3966	0.0024	0.4145	0.4459	0.0270852	0.0026	1.49989e-48	0.353	24589	5656	0.00864432	214.391
1395	rs2197025	IPF	M12017.metal.pos.txt.gz	G	A	G	A	-0.144	0.0014	0.4483	0.4882	0.0276121	0.0032	1.83716e-07	0.6552	24589	5656	0.00110485	27.1951
1396	rs2609259	IPF	M12017.metal.pos.txt.gz	C	A	C	A	-0.2642	-0.001	0.7654	0.7827	0.0316169	0.0034	6.4725e-17	0.7597	24589	5656	0.00283174	69.8218
1397	rs2967465	IPF	M12017.metal.pos.txt.gz	G	A	G	A	-0.2037	-0.0042	0.1113	0.1319	0.0407858	0.0036	5.90247e-07	0.2406	24589	5656	0.0010134	24.9418
1398	rs3808803	IPF	M12017.metal.pos.txt.gz	C	T	C	T	-0.1278	0.0018	0.5358	0.5516	0.0272959	0.0026	2.8407e-06	0.4999	24589	5656	0.000890712	21.9195
1399	rs4233306	IPF	M12017.metal.pos.txt.gz	C	T	C	T	0.2068	-0.0049	0.7913	0.8017	0.0349894	0.0034	3.41357e-09	0.1525	24589	5656	0.00141864	34.9295
1400	rs4642211	IPF	M12017.metal.pos.txt.gz	C	T	C	T	-0.1422	-0.0017	0.3539	0.3622	0.0285606	0.0026	6.39523e-07	0.514	24589	5656	0.00100713	24.7873
1401	rs6560861	IPF	M12017.metal.pos.txt.gz	G	A	G	A	0.1636	-0.0028	0.1928	0.1839	0.0346732	0.0035	2.3778e-06	0.4231	24589	5656	0.000904574	22.2609
1402	rs6786378	IPF	M12017.metal.pos.txt.gz	C	A	C	A	-0.1786	0.0037	0.159	0.147	0.0384673	0.0035	3.43537e-06	0.2986	24589	5656	0.000875909	21.5549
1403	rs7100920	IPF	M12017.metal.pos.txt.gz	C	T	C	T	-0.1744	0.0006	0.4612	0.5079	0.0272959	0.0026	1.66726e-10	0.8268	24589	5656	0.00165743	40.8189
1404	rs7138541	IPF	M12017.metal.pos.txt.gz	G	A	G	A	-0.1298	0.0007	0.3986	0.4054	0.0280337	0.0026	3.65408e-06	0.778	24589	5656	0.000871104	21.4365
1405	rs751709	IPF	M12017.metal.pos.txt.gz	G	T	G	T	0.4781	-0.0149	0.9761	0.9805	0.100858	0.0267	2.13372e-06	0.5766	24589	1452	0.000913018	22.4689
1406	rs757918	IPF	M12017.metal.pos.txt.gz	C	T	C	T	0.1254	-0.001	0.4503	0.4995	0.0272959	0.0026	4.34644e-06	0.7072	24589	5656	0.000857601	21.1039
1407	rs9860874	IPF	M12017.metal.pos.txt.gz	C	A	C	A	-0.2572	-0.0008	0.7356	0.7483	0.0298253	0.0027	6.49092e-18	0.7702	24589	5656	0.00301523	74.3596
1408	rs10967305	IPF	M12035.metal.pos.txt.gz	C	T	C	T	-0.1437	-0.002	0.4135	0.4079	0.0276121	0.0017	1.94795e-07	0.2395	24589	7356	0.00110026	27.0819
1409	rs11073517	IPF	M12035.metal.pos.txt.gz	C	T	C	T	-0.175	-0.0006	0.7296	0.6796	0.0288768	0.0024	1.35927e-09	0.8169	24589	7356	0.00149138	36.7234
1410	rs1123573	IPF	M12035.metal.pos.txt.gz	G	A	G	A	-0.1327	-0.0039	0.3867	0.3898	0.0282445	0.0018	2.62378e-06	0.02725	24589	7356	0.000896902	22.0719
1411	rs11788059	IPF	M12035.metal.pos.txt.gz	C	T	C	T	0.1547	0.0005	0.3648	0.3239	0.0283498	0.0024	4.84737e-08	0.8409	24589	7356	0.00120952	29.7745
1412	rs1214759	IPF	M12035.metal.pos.txt.gz	G	A	G	A	0.1652	-0.0002	0.6292	0.6694	0.0292984	0.0023	1.71495e-08	0.9237	24589	7356	0.00129131	31.7906
1413	rs12610495	IPF	M12035.metal.pos.txt.gz	G	A	G	A	0.2495	-0.003	0.2942	0.292	0.0304576	0.003	2.57551e-16	0.3173	23506	5590	0.00284664	67.0983
1414	rs12753958	IPF	M12035.metal.pos.txt.gz	G	T	G	T	-0.1753	-0.0001	0.8151	0.8496	0.0349894	0.003	5.44049e-07	0.9645	24589	7356	0.00101978	25.099
1415	rs2076295	IPF	M12035.metal.pos.txt.gz	G	T	G	T	0.3966	-0.0017	0.4145	0.4457	0.0270852	0.0018	1.49989e-48	0.3491	24589	7356	0.00864432	214.391
1416	rs2197025	IPF	M12035.metal.pos.txt.gz	G	A	G	A	-0.144	0.0019	0.4483	0.4881	0.0276121	0.0024	1.83716e-07	0.4267	24589	7356	0.00110485	27.1951
1417	rs2609259	IPF	M12035.metal.pos.txt.gz	C	A	C	A	-0.2642	-0.0047	0.7654	0.7827	0.0316169	0.0025	6.4725e-17	0.05503	24589	7356	0.00283174	69.8218
1418	rs2967465	IPF	M12035.metal.pos.txt.gz	G	A	G	A	-0.2037	-0.0044	0.1113	0.1289	0.0407858	0.0033	5.90247e-07	0.1841	24589	7356	0.0010134	24.9418
1419	rs3808803	IPF	M12035.metal.pos.txt.gz	C	T	C	T	-0.1278	-0.0032	0.5358	0.552	0.0272959	0.0017	2.8407e-06	0.06942	24589	7356	0.000890712	21.9195
1420	rs4233306	IPF	M12035.metal.pos.txt.gz	C	T	C	T	0.2068	0.0021	0.7913	0.8016	0.0349894	0.0025	3.41357e-09	0.3938	24589	7356	0.00141864	34.9295
1421	rs4642211	IPF	M12035.metal.pos.txt.gz	C	T	C	T	-0.1422	-0.0012	0.3539	0.3554	0.0285606	0.0024	6.39523e-07	0.6135	24589	7356	0.00100713	24.7873
1422	rs6560861	IPF	M12035.metal.pos.txt.gz	G	A	G	A	0.1636	0.0001	0.1928	0.1831	0.0346732	0.0026	2.3778e-06	0.9551	24589	7356	0.000904574	22.2609
1423	rs6786378	IPF	M12035.metal.pos.txt.gz	C	A	C	A	-0.1786	-0.003	0.159	0.1466	0.0384673	0.0032	3.43537e-06	0.3357	24589	7356	0.000875909	21.5549
1424	rs7100920	IPF	M12035.metal.pos.txt.gz	C	T	C	T	-0.1744	0.0005	0.4612	0.5065	0.0272959	0.0018	1.66726e-10	0.7627	24589	7356	0.00165743	40.8189
1425	rs7138541	IPF	M12035.metal.pos.txt.gz	G	A	G	A	-0.1298	0.0014	0.3986	0.4041	0.0280337	0.0018	3.65408e-06	0.4308	24589	7356	0.000871104	21.4365
1426	rs751709	IPF	M12035.metal.pos.txt.gz	G	T	G	T	0.4781	0.0079	0.9761	0.9813	0.100858	0.0192	2.13372e-06	0.6789	24589	1766	0.000913018	22.4689
1427	rs757918	IPF	M12035.metal.pos.txt.gz	C	T	C	T	0.1254	-0.0028	0.4503	0.4997	0.0272959	0.0018	4.34644e-06	0.1053	24589	7356	0.000857601	21.1039
1428	rs9860874	IPF	M12035.metal.pos.txt.gz	C	A	C	A	-0.2572	-0.0007	0.7356	0.7464	0.0298253	0.0024	6.49092e-18	0.7643	24589	7356	0.00301523	74.3596
1429	rs10967305	IPF	M12067.metal.pos.txt.gz	C	T	C	T	-0.1437	-0.0004	0.4135	0.4078	0.0276121	0.0016	1.94795e-07	0.7957	24589	7081	0.00110026	27.0819
1430	rs11073517	IPF	M12067.metal.pos.txt.gz	C	T	C	T	-0.175	0.0009	0.7296	0.6778	0.0288768	0.0017	1.35927e-09	0.5935	24589	7081	0.00149138	36.7234
1431	rs1123573	IPF	M12067.metal.pos.txt.gz	G	A	G	A	-0.1327	-0.0035	0.3867	0.3911	0.0282445	0.0016	2.62378e-06	0.03352	24589	7081	0.000896902	22.0719
1432	rs11788059	IPF	M12067.metal.pos.txt.gz	C	T	C	T	0.1547	0.0027	0.3648	0.3241	0.0283498	0.0016	4.84737e-08	0.1058	24589	7081	0.00120952	29.7745
1433	rs1214759	IPF	M12067.metal.pos.txt.gz	G	A	G	A	0.1652	0.0003	0.6292	0.6705	0.0292984	0.0016	1.71495e-08	0.8575	24589	7081	0.00129131	31.7906
1434	rs12610495	IPF	M12067.metal.pos.txt.gz	G	A	G	A	0.2495	0	0.2942	0.292	0.0304576	0.002	2.57551e-16	1	23506	5334	0.00284664	67.0983
1435	rs12753958	IPF	M12067.metal.pos.txt.gz	G	T	G	T	-0.1753	-0.0013	0.8151	0.8496	0.0349894	0.0023	5.44049e-07	0.5756	24589	7081	0.00101978	25.099
1436	rs2076295	IPF	M12067.metal.pos.txt.gz	G	T	G	T	0.3966	-0.0025	0.4145	0.4479	0.0270852	0.0016	1.49989e-48	0.1328	24589	7081	0.00864432	214.391
1437	rs2197025	IPF	M12067.metal.pos.txt.gz	G	A	G	A	-0.144	0.0014	0.4483	0.4884	0.0276121	0.0017	1.83716e-07	0.4127	24589	7081	0.00110485	27.1951
1438	rs2609259	IPF	M12067.metal.pos.txt.gz	C	A	C	A	-0.2642	-0.0054	0.7654	0.7831	0.0316169	0.0017	6.4725e-17	0.001495	24589	7081	0.00283174	69.8218
1439	rs2967465	IPF	M12067.metal.pos.txt.gz	G	A	G	A	-0.2037	0.0004	0.1113	0.1291	0.0407858	0.0025	5.90247e-07	0.8804	24589	7081	0.0010134	24.9418
1440	rs3808803	IPF	M12067.metal.pos.txt.gz	C	T	C	T	-0.1278	-0.0008	0.5358	0.5508	0.0272959	0.0016	2.8407e-06	0.6193	24589	7081	0.000890712	21.9195
1441	rs4233306	IPF	M12067.metal.pos.txt.gz	C	T	C	T	0.2068	0.0005	0.7913	0.8014	0.0349894	0.0017	3.41357e-09	0.7862	24589	7081	0.00141864	34.9295
1442	rs4642211	IPF	M12067.metal.pos.txt.gz	C	T	C	T	-0.1422	-0.0028	0.3539	0.358	0.0285606	0.0016	6.39523e-07	0.08695	24589	7081	0.00100713	24.7873
1443	rs6560861	IPF	M12067.metal.pos.txt.gz	G	A	G	A	0.1636	0.0029	0.1928	0.1829	0.0346732	0.0018	2.3778e-06	0.09573	24589	7081	0.000904574	22.2609
1444	rs6786378	IPF	M12067.metal.pos.txt.gz	C	A	C	A	-0.1786	-0.0027	0.159	0.1471	0.0384673	0.0018	3.43537e-06	0.1323	24589	7081	0.000875909	21.5549
1445	rs7100920	IPF	M12067.metal.pos.txt.gz	C	T	C	T	-0.1744	0.0009	0.4612	0.5083	0.0272959	0.0016	1.66726e-10	0.5649	24589	7081	0.00165743	40.8189
1446	rs7138541	IPF	M12067.metal.pos.txt.gz	G	A	G	A	-0.1298	-0.0007	0.3986	0.41	0.0280337	0.0016	3.65408e-06	0.6525	24589	7081	0.000871104	21.4365
1447	rs751709	IPF	M12067.metal.pos.txt.gz	G	T	G	T	0.4781	0.0208	0.9761	0.9813	0.100858	0.0146	2.13372e-06	0.1536	24589	1747	0.000913018	22.4689
1448	rs757918	IPF	M12067.metal.pos.txt.gz	C	T	C	T	0.1254	-0.0003	0.4503	0.4985	0.0272959	0.0016	4.34644e-06	0.8545	24589	7081	0.000857601	21.1039
1449	rs9860874	IPF	M12067.metal.pos.txt.gz	C	A	C	A	-0.2572	0.0004	0.7356	0.7468	0.0298253	0.0017	6.49092e-18	0.7929	24589	7081	0.00301523	74.3596
1450	rs10967305	IPF	M12129.metal.pos.txt.gz	C	T	C	T	-0.1437	0.0037	0.4135	0.4077	0.0276121	0.0026	1.94795e-07	0.1553	24589	6864	0.00110026	27.0819
1451	rs11073517	IPF	M12129.metal.pos.txt.gz	C	T	C	T	-0.175	-0.004	0.7296	0.6728	0.0288768	0.0027	1.35927e-09	0.1338	24589	6864	0.00149138	36.7234
1452	rs1123573	IPF	M12129.metal.pos.txt.gz	G	A	G	A	-0.1327	0.0012	0.3867	0.3894	0.0282445	0.0027	2.62378e-06	0.6578	24589	6864	0.000896902	22.0719
1453	rs11788059	IPF	M12129.metal.pos.txt.gz	C	T	C	T	0.1547	-0.0046	0.3648	0.3268	0.0283498	0.0027	4.84737e-08	0.08533	24589	6864	0.00120952	29.7745
1454	rs1214759	IPF	M12129.metal.pos.txt.gz	G	A	G	A	0.1652	0.0044	0.6292	0.6739	0.0292984	0.0027	1.71495e-08	0.1012	24589	6864	0.00129131	31.7906
1455	rs12610495	IPF	M12129.metal.pos.txt.gz	G	A	G	A	0.2495	0.003	0.2942	0.292	0.0304576	0.004	2.57551e-16	0.4533	23506	5278	0.00284664	67.0983
1456	rs12753958	IPF	M12129.metal.pos.txt.gz	G	T	G	T	-0.1753	-0.0087	0.8151	0.8566	0.0349894	0.0041	5.44049e-07	0.03476	24589	6864	0.00101978	25.099
1457	rs2076295	IPF	M12129.metal.pos.txt.gz	G	T	G	T	0.3966	0.0016	0.4145	0.4456	0.0270852	0.0027	1.49989e-48	0.5498	24589	6864	0.00864432	214.391
1458	rs2197025	IPF	M12129.metal.pos.txt.gz	G	A	G	A	-0.144	0.0018	0.4483	0.4876	0.0276121	0.0033	1.83716e-07	0.595	24589	6864	0.00110485	27.1951
1459	rs2609259	IPF	M12129.metal.pos.txt.gz	C	A	C	A	-0.2642	-0.0047	0.7654	0.7833	0.0316169	0.0034	6.4725e-17	0.1721	24589	6864	0.00283174	69.8218
1460	rs2967465	IPF	M12129.metal.pos.txt.gz	G	A	G	A	-0.2037	-0.004	0.1113	0.1327	0.0407858	0.0036	5.90247e-07	0.2731	24589	6864	0.0010134	24.9418
1461	rs3808803	IPF	M12129.metal.pos.txt.gz	C	T	C	T	-0.1278	-0.0009	0.5358	0.5527	0.0272959	0.0026	2.8407e-06	0.7351	24589	6864	0.000890712	21.9195
1462	rs4233306	IPF	M12129.metal.pos.txt.gz	C	T	C	T	0.2068	0.0076	0.7913	0.8016	0.0349894	0.0035	3.41357e-09	0.02836	24589	6864	0.00141864	34.9295
1463	rs4642211	IPF	M12129.metal.pos.txt.gz	C	T	C	T	-0.1422	-0.0024	0.3539	0.363	0.0285606	0.0027	6.39523e-07	0.3763	24589	6864	0.00100713	24.7873
1464	rs6560861	IPF	M12129.metal.pos.txt.gz	G	A	G	A	0.1636	-0.0066	0.1928	0.1832	0.0346732	0.0035	2.3778e-06	0.06124	24589	6864	0.000904574	22.2609
1465	rs6786378	IPF	M12129.metal.pos.txt.gz	C	A	C	A	-0.1786	-0.0036	0.159	0.1474	0.0384673	0.0036	3.43537e-06	0.3172	24589	6864	0.000875909	21.5549
1466	rs7100920	IPF	M12129.metal.pos.txt.gz	C	T	C	T	-0.1744	0.0013	0.4612	0.5061	0.0272959	0.0027	1.66726e-10	0.6296	24589	6864	0.00165743	40.8189
1467	rs7138541	IPF	M12129.metal.pos.txt.gz	G	A	G	A	-0.1298	-0.0021	0.3986	0.4028	0.0280337	0.0026	3.65408e-06	0.4244	24589	6864	0.000871104	21.4365
1468	rs751709	IPF	M12129.metal.pos.txt.gz	G	T	G	T	0.4781	-0.0213	0.9761	0.9815	0.100858	0.0296	2.13372e-06	0.4708	24589	1586	0.000913018	22.4689
1469	rs757918	IPF	M12129.metal.pos.txt.gz	C	T	C	T	0.1254	-0.0009	0.4503	0.4989	0.0272959	0.0027	4.34644e-06	0.7293	24589	6864	0.000857601	21.1039
1470	rs9860874	IPF	M12129.metal.pos.txt.gz	C	A	C	A	-0.2572	-0.0023	0.7356	0.7478	0.0298253	0.0027	6.49092e-18	0.394	24589	6864	0.00301523	74.3596
1471	rs10967305	IPF	M12261.metal.pos.txt.gz	C	T	C	T	-0.1437	0.0033	0.4135	0.4112	0.0276121	0.01	1.94795e-07	0.7443	24589	1543	0.00110026	27.0819
1472	rs11073517	IPF	M12261.metal.pos.txt.gz	C	T	C	T	-0.175	-0.0062	0.7296	0.6869	0.0288768	0.0109	1.35927e-09	0.5706	24589	1543	0.00149138	36.7234
1473	rs1123573	IPF	M12261.metal.pos.txt.gz	G	A	G	A	-0.1327	-0.0033	0.3867	0.3939	0.0282445	0.0105	2.62378e-06	0.752	24589	1543	0.000896902	22.0719
1474	rs11788059	IPF	M12261.metal.pos.txt.gz	C	T	C	T	0.1547	0.0046	0.3648	0.3193	0.0283498	0.0106	4.84737e-08	0.6654	24589	1543	0.00120952	29.7745
1475	rs1214759	IPF	M12261.metal.pos.txt.gz	G	A	G	A	0.1652	-0.0053	0.6292	0.6623	0.0292984	0.0106	1.71495e-08	0.6194	24589	1543	0.00129131	31.7906
1476	rs12610495	IPF	M12261.metal.pos.txt.gz	G	A	G	A	0.2495	0.011	0.2942	0.292	0.0304576	0.021	2.57551e-16	0.6004	23506	580	0.00284664	67.0983
1477	rs12753958	IPF	M12261.metal.pos.txt.gz	G	T	G	T	-0.1753	0.0165	0.8151	0.8272	0.0349894	0.0143	5.44049e-07	0.2483	24589	1543	0.00101978	25.099
1478	rs2076295	IPF	M12261.metal.pos.txt.gz	G	T	G	T	0.3966	-0.0034	0.4145	0.4484	0.0270852	0.0105	1.49989e-48	0.7474	24589	1543	0.00864432	214.391
1479	rs2197025	IPF	M12261.metal.pos.txt.gz	G	A	G	A	-0.144	0.0027	0.4483	0.4935	0.0276121	0.0109	1.83716e-07	0.8048	24589	1543	0.00110485	27.1951
1480	rs2609259	IPF	M12261.metal.pos.txt.gz	C	A	C	A	-0.2642	-0.0042	0.7654	0.7868	0.0316169	0.012	6.4725e-17	0.7299	24589	1543	0.00283174	69.8218
1481	rs2967465	IPF	M12261.metal.pos.txt.gz	G	A	G	A	-0.2037	0.0281	0.1113	0.1199	0.0407858	0.0155	5.90247e-07	0.0699	24589	1543	0.0010134	24.9418
1482	rs3808803	IPF	M12261.metal.pos.txt.gz	C	T	C	T	-0.1278	-0.0093	0.5358	0.5557	0.0272959	0.0104	2.8407e-06	0.3703	24589	1543	0.000890712	21.9195
1483	rs4233306	IPF	M12261.metal.pos.txt.gz	C	T	C	T	0.2068	0.0052	0.7913	0.7986	0.0349894	0.0127	3.41357e-09	0.683	24589	1543	0.00141864	34.9295
1484	rs4642211	IPF	M12261.metal.pos.txt.gz	C	T	C	T	-0.1422	0.0046	0.3539	0.3468	0.0285606	0.0103	6.39523e-07	0.6532	24589	1543	0.00100713	24.7873
1485	rs6560861	IPF	M12261.metal.pos.txt.gz	G	A	G	A	0.1636	-0.0016	0.1928	0.1883	0.0346732	0.0136	2.3778e-06	0.9054	24589	1543	0.000904574	22.2609
1486	rs6786378	IPF	M12261.metal.pos.txt.gz	C	A	C	A	-0.1786	-0.0142	0.159	0.1487	0.0384673	0.014	3.43537e-06	0.3104	24589	1543	0.000875909	21.5549
1487	rs7100920	IPF	M12261.metal.pos.txt.gz	C	T	C	T	-0.1744	-0.0193	0.4612	0.5128	0.0272959	0.0103	1.66726e-10	0.06026	24589	1543	0.00165743	40.8189
1488	rs7138541	IPF	M12261.metal.pos.txt.gz	G	A	G	A	-0.1298	-0.0007	0.3986	0.4294	0.0280337	0.01	3.65408e-06	0.9448	24589	1543	0.000871104	21.4365
1489	rs751709	IPF	M12261.metal.pos.txt.gz	G	T	G	T	0.4781	-0.1086	0.9761	0.9809	0.100858	0.0697	2.13372e-06	0.1193	24589	963	0.000913018	22.4689
1490	rs757918	IPF	M12261.metal.pos.txt.gz	C	T	C	T	0.1254	0.0117	0.4503	0.505	0.0272959	0.0102	4.34644e-06	0.2505	24589	1543	0.000857601	21.1039
1491	rs9860874	IPF	M12261.metal.pos.txt.gz	C	A	C	A	-0.2572	-0.0091	0.7356	0.7483	0.0298253	0.0112	6.49092e-18	0.4171	24589	1543	0.00301523	74.3596
1492	rs10967305	IPF	M12593.metal.pos.txt.gz	C	T	C	T	-0.1437	-0.0007	0.4135	0.4084	0.0276121	0.0016	1.94795e-07	0.6702	24589	7314	0.00110026	27.0819
1493	rs11073517	IPF	M12593.metal.pos.txt.gz	C	T	C	T	-0.175	0.0019	0.7296	0.678	0.0288768	0.0016	1.35927e-09	0.2378	24589	7314	0.00149138	36.7234
1494	rs1123573	IPF	M12593.metal.pos.txt.gz	G	A	G	A	-0.1327	0.0004	0.3867	0.3916	0.0282445	0.0016	2.62378e-06	0.788	24589	7314	0.000896902	22.0719
1495	rs11788059	IPF	M12593.metal.pos.txt.gz	C	T	C	T	0.1547	0.0011	0.3648	0.324	0.0283498	0.0016	4.84737e-08	0.4856	24589	7314	0.00120952	29.7745
1496	rs1214759	IPF	M12593.metal.pos.txt.gz	G	A	G	A	0.1652	0.0011	0.6292	0.6704	0.0292984	0.0016	1.71495e-08	0.5074	24589	7314	0.00129131	31.7906
1497	rs12610495	IPF	M12593.metal.pos.txt.gz	G	A	G	A	0.2495	-0.003	0.2942	0.292	0.0304576	0.002	2.57551e-16	0.1336	23506	5564	0.00284664	67.0983
1498	rs12753958	IPF	M12593.metal.pos.txt.gz	G	T	G	T	-0.1753	0.0015	0.8151	0.8484	0.0349894	0.0022	5.44049e-07	0.4956	24589	7314	0.00101978	25.099
1499	rs2076295	IPF	M12593.metal.pos.txt.gz	G	T	G	T	0.3966	-0.0002	0.4145	0.4476	0.0270852	0.0016	1.49989e-48	0.8962	24589	7314	0.00864432	214.391
1500	rs2197025	IPF	M12593.metal.pos.txt.gz	G	A	G	A	-0.144	0.0007	0.4483	0.4881	0.0276121	0.0016	1.83716e-07	0.6694	24589	7314	0.00110485	27.1951
1501	rs2609259	IPF	M12593.metal.pos.txt.gz	C	A	C	A	-0.2642	0.0008	0.7654	0.7829	0.0316169	0.0017	6.4725e-17	0.6457	24589	7314	0.00283174	69.8218
1502	rs2967465	IPF	M12593.metal.pos.txt.gz	G	A	G	A	-0.2037	-0.0007	0.1113	0.1283	0.0407858	0.0024	5.90247e-07	0.7691	24589	7314	0.0010134	24.9418
1503	rs3808803	IPF	M12593.metal.pos.txt.gz	C	T	C	T	-0.1278	-0.0003	0.5358	0.5509	0.0272959	0.0016	2.8407e-06	0.8366	24589	7314	0.000890712	21.9195
1504	rs4233306	IPF	M12593.metal.pos.txt.gz	C	T	C	T	0.2068	-0.0033	0.7913	0.8013	0.0349894	0.0017	3.41357e-09	0.0534	24589	7314	0.00141864	34.9295
1505	rs4642211	IPF	M12593.metal.pos.txt.gz	C	T	C	T	-0.1422	0.0009	0.3539	0.3568	0.0285606	0.0016	6.39523e-07	0.5868	24589	7314	0.00100713	24.7873
1506	rs6560861	IPF	M12593.metal.pos.txt.gz	G	A	G	A	0.1636	-0.0051	0.1928	0.183	0.0346732	0.0017	2.3778e-06	0.003499	24589	7314	0.000904574	22.2609
1507	rs6786378	IPF	M12593.metal.pos.txt.gz	C	A	C	A	-0.1786	-0.0012	0.159	0.1465	0.0384673	0.0023	3.43537e-06	0.62	24589	7314	0.000875909	21.5549
1508	rs7100920	IPF	M12593.metal.pos.txt.gz	C	T	C	T	-0.1744	-0.001	0.4612	0.5082	0.0272959	0.0016	1.66726e-10	0.5132	24589	7314	0.00165743	40.8189
1509	rs7138541	IPF	M12593.metal.pos.txt.gz	G	A	G	A	-0.1298	0.0003	0.3986	0.4108	0.0280337	0.0016	3.65408e-06	0.863	24589	7314	0.000871104	21.4365
1510	rs751709	IPF	M12593.metal.pos.txt.gz	G	T	G	T	0.4781	0.005	0.9761	0.9813	0.100858	0.0138	2.13372e-06	0.72	24589	1750	0.000913018	22.4689
1511	rs757918	IPF	M12593.metal.pos.txt.gz	C	T	C	T	0.1254	-0.0009	0.4503	0.4983	0.0272959	0.0016	4.34644e-06	0.5948	24589	7314	0.000857601	21.1039
1512	rs9860874	IPF	M12593.metal.pos.txt.gz	C	A	C	A	-0.2572	-0.0001	0.7356	0.7469	0.0298253	0.0017	6.49092e-18	0.9729	24589	7314	0.00301523	74.3596
1513	rs10967305	IPF	M12626.metal.pos.txt.gz	C	T	C	T	-0.1437	-0.0001	0.4135	0.4087	0.0276121	0.0025	1.94795e-07	0.9834	24589	7258	0.00110026	27.0819
1514	rs11073517	IPF	M12626.metal.pos.txt.gz	C	T	C	T	-0.175	-0.0046	0.7296	0.6755	0.0288768	0.0026	1.35927e-09	0.07073	24589	7258	0.00149138	36.7234
1515	rs1123573	IPF	M12626.metal.pos.txt.gz	G	A	G	A	-0.1327	0.0068	0.3867	0.391	0.0282445	0.0025	2.62378e-06	0.007011	24589	7258	0.000896902	22.0719
1516	rs11788059	IPF	M12626.metal.pos.txt.gz	C	T	C	T	0.1547	-0.0034	0.3648	0.3249	0.0283498	0.0025	4.84737e-08	0.1812	24589	7258	0.00120952	29.7745
1517	rs1214759	IPF	M12626.metal.pos.txt.gz	G	A	G	A	0.1652	-0.0019	0.6292	0.6722	0.0292984	0.0025	1.71495e-08	0.4648	24589	7258	0.00129131	31.7906
1518	rs12610495	IPF	M12626.metal.pos.txt.gz	G	A	G	A	0.2495	0	0.2942	0.292	0.0304576	0.003	2.57551e-16	1	23506	5512	0.00284664	67.0983
1519	rs12753958	IPF	M12626.metal.pos.txt.gz	G	T	G	T	-0.1753	-0.0016	0.8151	0.8575	0.0349894	0.0033	5.44049e-07	0.6293	24589	7258	0.00101978	25.099
1520	rs2076295	IPF	M12626.metal.pos.txt.gz	G	T	G	T	0.3966	-0.0028	0.4145	0.4472	0.0270852	0.0025	1.49989e-48	0.2633	24589	7258	0.00864432	214.391
1521	rs2197025	IPF	M12626.metal.pos.txt.gz	G	A	G	A	-0.144	0.001	0.4483	0.4882	0.0276121	0.0026	1.83716e-07	0.707	24589	7258	0.00110485	27.1951
1522	rs2609259	IPF	M12626.metal.pos.txt.gz	C	A	C	A	-0.2642	-0.0018	0.7654	0.7833	0.0316169	0.0026	6.4725e-17	0.4924	24589	7258	0.00283174	69.8218
1523	rs2967465	IPF	M12626.metal.pos.txt.gz	G	A	G	A	-0.2037	-0.0052	0.1113	0.131	0.0407858	0.0035	5.90247e-07	0.1378	24589	7258	0.0010134	24.9418
1524	rs3808803	IPF	M12626.metal.pos.txt.gz	C	T	C	T	-0.1278	0.0016	0.5358	0.5511	0.0272959	0.0025	2.8407e-06	0.5178	24589	7258	0.000890712	21.9195
1525	rs4233306	IPF	M12626.metal.pos.txt.gz	C	T	C	T	0.2068	0.0044	0.7913	0.8012	0.0349894	0.0027	3.41357e-09	0.09488	24589	7258	0.00141864	34.9295
1526	rs4642211	IPF	M12626.metal.pos.txt.gz	C	T	C	T	-0.1422	-0.0003	0.3539	0.3601	0.0285606	0.0025	6.39523e-07	0.9157	24589	7258	0.00100713	24.7873
1527	rs6560861	IPF	M12626.metal.pos.txt.gz	G	A	G	A	0.1636	0.0008	0.1928	0.183	0.0346732	0.0027	2.3778e-06	0.7692	24589	7258	0.000904574	22.2609
1528	rs6786378	IPF	M12626.metal.pos.txt.gz	C	A	C	A	-0.1786	-0.0042	0.159	0.1473	0.0384673	0.0034	3.43537e-06	0.2211	24589	7258	0.000875909	21.5549
1529	rs7100920	IPF	M12626.metal.pos.txt.gz	C	T	C	T	-0.1744	0.0007	0.4612	0.5075	0.0272959	0.0025	1.66726e-10	0.7737	24589	7258	0.00165743	40.8189
1530	rs7138541	IPF	M12626.metal.pos.txt.gz	G	A	G	A	-0.1298	0.0007	0.3986	0.4076	0.0280337	0.0025	3.65408e-06	0.7762	24589	7258	0.000871104	21.4365
1531	rs751709	IPF	M12626.metal.pos.txt.gz	G	T	G	T	0.4781	-0.0157	0.9761	0.9814	0.100858	0.0242	2.13372e-06	0.5168	24589	1746	0.000913018	22.4689
1532	rs757918	IPF	M12626.metal.pos.txt.gz	C	T	C	T	0.1254	-0.0011	0.4503	0.4986	0.0272959	0.0025	4.34644e-06	0.6749	24589	7258	0.000857601	21.1039
1533	rs9860874	IPF	M12626.metal.pos.txt.gz	C	A	C	A	-0.2572	-0.0004	0.7356	0.7471	0.0298253	0.0026	6.49092e-18	0.8624	24589	7258	0.00301523	74.3596
1534	rs10967305	IPF	M12768.metal.pos.txt.gz	C	T	C	T	-0.1437	-0.0004	0.4135	0.4079	0.0276121	0.0026	1.94795e-07	0.8854	24589	7034	0.00110026	27.0819
1535	rs11073517	IPF	M12768.metal.pos.txt.gz	C	T	C	T	-0.175	0.0012	0.7296	0.6732	0.0288768	0.0027	1.35927e-09	0.6484	24589	7034	0.00149138	36.7234
1536	rs1123573	IPF	M12768.metal.pos.txt.gz	G	A	G	A	-0.1327	0.0005	0.3867	0.3892	0.0282445	0.0026	2.62378e-06	0.8573	24589	7034	0.000896902	22.0719
1537	rs11788059	IPF	M12768.metal.pos.txt.gz	C	T	C	T	0.1547	-0.0016	0.3648	0.326	0.0283498	0.0027	4.84737e-08	0.5388	24589	7034	0.00120952	29.7745
1538	rs1214759	IPF	M12768.metal.pos.txt.gz	G	A	G	A	0.1652	-0.0061	0.6292	0.6739	0.0292984	0.0026	1.71495e-08	0.02143	24589	7034	0.00129131	31.7906
1539	rs12610495	IPF	M12768.metal.pos.txt.gz	G	A	G	A	0.2495	-0.004	0.2942	0.292	0.0304576	0.004	2.57551e-16	0.3173	23506	5352	0.00284664	67.0983
1540	rs12753958	IPF	M12768.metal.pos.txt.gz	G	T	G	T	-0.1753	-0.0002	0.8151	0.8566	0.0349894	0.0041	5.44049e-07	0.9536	24589	7034	0.00101978	25.099
1541	rs2076295	IPF	M12768.metal.pos.txt.gz	G	T	G	T	0.3966	0.0011	0.4145	0.446	0.0270852	0.0027	1.49989e-48	0.6697	24589	7034	0.00864432	214.391
1542	rs2197025	IPF	M12768.metal.pos.txt.gz	G	A	G	A	-0.144	-0.0045	0.4483	0.4888	0.0276121	0.0033	1.83716e-07	0.1742	24589	7034	0.00110485	27.1951
1543	rs2609259	IPF	M12768.metal.pos.txt.gz	C	A	C	A	-0.2642	-0.0043	0.7654	0.7832	0.0316169	0.0034	6.4725e-17	0.2025	24589	7034	0.00283174	69.8218
1544	rs2967465	IPF	M12768.metal.pos.txt.gz	G	A	G	A	-0.2037	-0.0012	0.1113	0.1298	0.0407858	0.0043	5.90247e-07	0.7868	24589	7034	0.0010134	24.9418
1545	rs3808803	IPF	M12768.metal.pos.txt.gz	C	T	C	T	-0.1278	0.0013	0.5358	0.5524	0.0272959	0.0026	2.8407e-06	0.6323	24589	7034	0.000890712	21.9195
1546	rs4233306	IPF	M12768.metal.pos.txt.gz	C	T	C	T	0.2068	0.0058	0.7913	0.8017	0.0349894	0.0035	3.41357e-09	0.09254	24589	7034	0.00141864	34.9295
1547	rs4642211	IPF	M12768.metal.pos.txt.gz	C	T	C	T	-0.1422	0.0002	0.3539	0.3625	0.0285606	0.0026	6.39523e-07	0.9336	24589	7034	0.00100713	24.7873
1548	rs6560861	IPF	M12768.metal.pos.txt.gz	G	A	G	A	0.1636	-0.0051	0.1928	0.1832	0.0346732	0.0035	2.3778e-06	0.1515	24589	7034	0.000904574	22.2609
1549	rs6786378	IPF	M12768.metal.pos.txt.gz	C	A	C	A	-0.1786	-0.0017	0.159	0.147	0.0384673	0.0042	3.43537e-06	0.6931	24589	7034	0.000875909	21.5549
1550	rs7100920	IPF	M12768.metal.pos.txt.gz	C	T	C	T	-0.1744	-0.002	0.4612	0.5068	0.0272959	0.0026	1.66726e-10	0.447	24589	7034	0.00165743	40.8189
1551	rs7138541	IPF	M12768.metal.pos.txt.gz	G	A	G	A	-0.1298	-0.0058	0.3986	0.4042	0.0280337	0.0026	3.65408e-06	0.02625	24589	7034	0.000871104	21.4365
1552	rs751709	IPF	M12768.metal.pos.txt.gz	G	T	G	T	0.4781	0.0266	0.9761	0.9819	0.100858	0.0293	2.13372e-06	0.3642	24589	1682	0.000913018	22.4689
1553	rs757918	IPF	M12768.metal.pos.txt.gz	C	T	C	T	0.1254	0.0038	0.4503	0.4996	0.0272959	0.0026	4.34644e-06	0.1468	24589	7034	0.000857601	21.1039
1554	rs9860874	IPF	M12768.metal.pos.txt.gz	C	A	C	A	-0.2572	0.0058	0.7356	0.7469	0.0298253	0.0033	6.49092e-18	0.08549	24589	7034	0.00301523	74.3596
1555	rs10967305	IPF	M12774.metal.pos.txt.gz	C	T	C	T	-0.1437	0	0.4135	0.4079	0.0276121	0.0018	1.94795e-07	0.985	24589	7356	0.00110026	27.0819
1556	rs11073517	IPF	M12774.metal.pos.txt.gz	C	T	C	T	-0.175	0.0015	0.7296	0.6781	0.0288768	0.0024	1.35927e-09	0.5372	24589	7356	0.00149138	36.7234
1557	rs1123573	IPF	M12774.metal.pos.txt.gz	G	A	G	A	-0.1327	0.0039	0.3867	0.3917	0.0282445	0.0024	2.62378e-06	0.1067	24589	7356	0.000896902	22.0719
1558	rs11788059	IPF	M12774.metal.pos.txt.gz	C	T	C	T	0.1547	0.0015	0.3648	0.3245	0.0283498	0.0024	4.84737e-08	0.5483	24589	7356	0.00120952	29.7745
1559	rs1214759	IPF	M12774.metal.pos.txt.gz	G	A	G	A	0.1652	-0.0012	0.6292	0.6703	0.0292984	0.0024	1.71495e-08	0.6218	24589	7356	0.00129131	31.7906
1560	rs12610495	IPF	M12774.metal.pos.txt.gz	G	A	G	A	0.2495	-0.01	0.2942	0.292	0.0304576	0.003	2.57551e-16	0.0008581	23506	5595	0.00284664	67.0983
1561	rs12753958	IPF	M12774.metal.pos.txt.gz	G	T	G	T	-0.1753	0.0016	0.8151	0.8521	0.0349894	0.0031	5.44049e-07	0.6196	24589	7356	0.00101978	25.099
1562	rs2076295	IPF	M12774.metal.pos.txt.gz	G	T	G	T	0.3966	-0.0003	0.4145	0.448	0.0270852	0.0024	1.49989e-48	0.891	24589	7356	0.00864432	214.391
1563	rs2197025	IPF	M12774.metal.pos.txt.gz	G	A	G	A	-0.144	0.0058	0.4483	0.488	0.0276121	0.0024	1.83716e-07	0.01624	24589	7356	0.00110485	27.1951
1564	rs2609259	IPF	M12774.metal.pos.txt.gz	C	A	C	A	-0.2642	-0.0003	0.7654	0.7829	0.0316169	0.0025	6.4725e-17	0.9191	24589	7356	0.00283174	69.8218
1565	rs2967465	IPF	M12774.metal.pos.txt.gz	G	A	G	A	-0.2037	-0.0042	0.1113	0.1296	0.0407858	0.0034	5.90247e-07	0.2054	24589	7356	0.0010134	24.9418
1566	rs3808803	IPF	M12774.metal.pos.txt.gz	C	T	C	T	-0.1278	-0.0045	0.5358	0.5525	0.0272959	0.0018	2.8407e-06	0.01188	24589	7356	0.000890712	21.9195
1567	rs4233306	IPF	M12774.metal.pos.txt.gz	C	T	C	T	0.2068	-0.0038	0.7913	0.8015	0.0349894	0.0026	3.41357e-09	0.1338	24589	7356	0.00141864	34.9295
1568	rs4642211	IPF	M12774.metal.pos.txt.gz	C	T	C	T	-0.1422	-0.0007	0.3539	0.357	0.0285606	0.0024	6.39523e-07	0.787	24589	7356	0.00100713	24.7873
1569	rs6560861	IPF	M12774.metal.pos.txt.gz	G	A	G	A	0.1636	0.0017	0.1928	0.1832	0.0346732	0.0026	2.3778e-06	0.5104	24589	7356	0.000904574	22.2609
1570	rs6786378	IPF	M12774.metal.pos.txt.gz	C	A	C	A	-0.1786	0.0014	0.159	0.1469	0.0384673	0.0032	3.43537e-06	0.6748	24589	7356	0.000875909	21.5549
1571	rs7100920	IPF	M12774.metal.pos.txt.gz	C	T	C	T	-0.1744	-0.0031	0.4612	0.5087	0.0272959	0.0024	1.66726e-10	0.1995	24589	7356	0.00165743	40.8189
1572	rs7138541	IPF	M12774.metal.pos.txt.gz	G	A	G	A	-0.1298	0.0019	0.3986	0.4111	0.0280337	0.0024	3.65408e-06	0.4315	24589	7356	0.000871104	21.4365
1573	rs751709	IPF	M12774.metal.pos.txt.gz	G	T	G	T	0.4781	-0.0153	0.9761	0.9813	0.100858	0.0206	2.13372e-06	0.4583	24589	1761	0.000913018	22.4689
1574	rs757918	IPF	M12774.metal.pos.txt.gz	C	T	C	T	0.1254	0.0012	0.4503	0.4984	0.0272959	0.0024	4.34644e-06	0.6029	24589	7356	0.000857601	21.1039
1575	rs9860874	IPF	M12774.metal.pos.txt.gz	C	A	C	A	-0.2572	0.0008	0.7356	0.7467	0.0298253	0.0025	6.49092e-18	0.7597	24589	7356	0.00301523	74.3596
1576	rs10967305	IPF	M15122.metal.pos.txt.gz	C	T	C	T	-0.1437	0.0029	0.4135	0.4082	0.0276121	0.0025	1.94795e-07	0.2415	24589	7352	0.00110026	27.0819
1577	rs11073517	IPF	M15122.metal.pos.txt.gz	C	T	C	T	-0.175	-0.0019	0.7296	0.676	0.0288768	0.0026	1.35927e-09	0.4563	24589	7352	0.00149138	36.7234
1578	rs1123573	IPF	M15122.metal.pos.txt.gz	G	A	G	A	-0.1327	0.0036	0.3867	0.3908	0.0282445	0.0025	2.62378e-06	0.1557	24589	7352	0.000896902	22.0719
1579	rs11788059	IPF	M15122.metal.pos.txt.gz	C	T	C	T	0.1547	-0.0039	0.3648	0.3249	0.0283498	0.0025	4.84737e-08	0.1244	24589	7352	0.00120952	29.7745
1580	rs1214759	IPF	M15122.metal.pos.txt.gz	G	A	G	A	0.1652	0.002	0.6292	0.6721	0.0292984	0.0025	1.71495e-08	0.4292	24589	7352	0.00129131	31.7906
1581	rs12610495	IPF	M15122.metal.pos.txt.gz	G	A	G	A	0.2495	0	0.2942	0.292	0.0304576	0.003	2.57551e-16	1	23506	5595	0.00284664	67.0983
1582	rs12753958	IPF	M15122.metal.pos.txt.gz	G	T	G	T	-0.1753	0.005	0.8151	0.8573	0.0349894	0.0033	5.44049e-07	0.1287	24589	7352	0.00101978	25.099
1583	rs2076295	IPF	M15122.metal.pos.txt.gz	G	T	G	T	0.3966	-0.0026	0.4145	0.4469	0.0270852	0.0025	1.49989e-48	0.3052	24589	7352	0.00864432	214.391
1584	rs2197025	IPF	M15122.metal.pos.txt.gz	G	A	G	A	-0.144	-0.0012	0.4483	0.4879	0.0276121	0.0025	1.83716e-07	0.6259	24589	7352	0.00110485	27.1951
1585	rs2609259	IPF	M15122.metal.pos.txt.gz	C	A	C	A	-0.2642	0.0026	0.7654	0.7831	0.0316169	0.0026	6.4725e-17	0.3285	24589	7352	0.00283174	69.8218
1586	rs2967465	IPF	M15122.metal.pos.txt.gz	G	A	G	A	-0.2037	-0.004	0.1113	0.131	0.0407858	0.0035	5.90247e-07	0.2484	24589	7352	0.0010134	24.9418
1587	rs3808803	IPF	M15122.metal.pos.txt.gz	C	T	C	T	-0.1278	-0.0025	0.5358	0.5512	0.0272959	0.0025	2.8407e-06	0.3102	24589	7352	0.000890712	21.9195
1588	rs4233306	IPF	M15122.metal.pos.txt.gz	C	T	C	T	0.2068	-0.0049	0.7913	0.8014	0.0349894	0.0027	3.41357e-09	0.06437	24589	7352	0.00141864	34.9295
1589	rs4642211	IPF	M15122.metal.pos.txt.gz	C	T	C	T	-0.1422	-0.002	0.3539	0.3595	0.0285606	0.0025	6.39523e-07	0.4311	24589	7352	0.00100713	24.7873
1590	rs6560861	IPF	M15122.metal.pos.txt.gz	G	A	G	A	0.1636	0.0049	0.1928	0.1831	0.0346732	0.0027	2.3778e-06	0.06933	24589	7352	0.000904574	22.2609
1591	rs6786378	IPF	M15122.metal.pos.txt.gz	C	A	C	A	-0.1786	-0.0021	0.159	0.1466	0.0384673	0.0034	3.43537e-06	0.5404	24589	7352	0.000875909	21.5549
1592	rs7100920	IPF	M15122.metal.pos.txt.gz	C	T	C	T	-0.1744	0.0008	0.4612	0.5077	0.0272959	0.0025	1.66726e-10	0.7447	24589	7352	0.00165743	40.8189
1593	rs7138541	IPF	M15122.metal.pos.txt.gz	G	A	G	A	-0.1298	0.0009	0.3986	0.4077	0.0280337	0.0025	3.65408e-06	0.7042	24589	7352	0.000871104	21.4365
1594	rs751709	IPF	M15122.metal.pos.txt.gz	G	T	G	T	0.4781	0.001	0.9761	0.9813	0.100858	0.0239	2.13372e-06	0.9661	24589	1757	0.000913018	22.4689
1595	rs757918	IPF	M15122.metal.pos.txt.gz	C	T	C	T	0.1254	0.0036	0.4503	0.4993	0.0272959	0.0025	4.34644e-06	0.1575	24589	7352	0.000857601	21.1039
1596	rs9860874	IPF	M15122.metal.pos.txt.gz	C	A	C	A	-0.2572	-0.0009	0.7356	0.7474	0.0298253	0.0026	6.49092e-18	0.7253	24589	7352	0.00301523	74.3596
1597	rs10967305	IPF	M15140.metal.pos.txt.gz	C	T	C	T	-0.1437	-0.0032	0.4135	0.4081	0.0276121	0.0017	1.94795e-07	0.06129	24589	7368	0.00110026	27.0819
1598	rs11073517	IPF	M15140.metal.pos.txt.gz	C	T	C	T	-0.175	-0.0028	0.7296	0.6743	0.0288768	0.0018	1.35927e-09	0.1138	24589	7368	0.00149138	36.7234
1599	rs1123573	IPF	M15140.metal.pos.txt.gz	G	A	G	A	-0.1327	-0.0001	0.3867	0.3901	0.0282445	0.0017	2.62378e-06	0.97	24589	7368	0.000896902	22.0719
1600	rs11788059	IPF	M15140.metal.pos.txt.gz	C	T	C	T	0.1547	0.001	0.3648	0.3255	0.0283498	0.0017	4.84737e-08	0.5797	24589	7368	0.00120952	29.7745
1601	rs1214759	IPF	M15140.metal.pos.txt.gz	G	A	G	A	0.1652	0.0041	0.6292	0.6733	0.0292984	0.0017	1.71495e-08	0.01783	24589	7368	0.00129131	31.7906
1602	rs12610495	IPF	M15140.metal.pos.txt.gz	G	A	G	A	0.2495	0.001	0.2942	0.292	0.0304576	0.003	2.57551e-16	0.7389	23506	5604	0.00284664	67.0983
1603	rs12753958	IPF	M15140.metal.pos.txt.gz	G	T	G	T	-0.1753	-0.0033	0.8151	0.8473	0.0349894	0.003	5.44049e-07	0.2628	24589	7368	0.00101978	25.099
1604	rs2076295	IPF	M15140.metal.pos.txt.gz	G	T	G	T	0.3966	-0.0014	0.4145	0.446	0.0270852	0.0017	1.49989e-48	0.4329	24589	7368	0.00864432	214.391
1605	rs2197025	IPF	M15140.metal.pos.txt.gz	G	A	G	A	-0.144	-0.0005	0.4483	0.488	0.0276121	0.0023	1.83716e-07	0.8373	24589	7368	0.00110485	27.1951
1606	rs2609259	IPF	M15140.metal.pos.txt.gz	C	A	C	A	-0.2642	-0.0045	0.7654	0.7825	0.0316169	0.0024	6.4725e-17	0.05868	24589	7368	0.00283174	69.8218
1607	rs2967465	IPF	M15140.metal.pos.txt.gz	G	A	G	A	-0.2037	-0.0025	0.1113	0.131	0.0407858	0.0026	5.90247e-07	0.3323	24589	7368	0.0010134	24.9418
1608	rs3808803	IPF	M15140.metal.pos.txt.gz	C	T	C	T	-0.1278	-0.0018	0.5358	0.5518	0.0272959	0.0017	2.8407e-06	0.2966	24589	7368	0.000890712	21.9195
1609	rs4233306	IPF	M15140.metal.pos.txt.gz	C	T	C	T	0.2068	0	0.7913	0.8018	0.0349894	0.0025	3.41357e-09	0.9983	24589	7368	0.00141864	34.9295
1610	rs4642211	IPF	M15140.metal.pos.txt.gz	C	T	C	T	-0.1422	-0.0003	0.3539	0.3618	0.0285606	0.0017	6.39523e-07	0.8613	24589	7368	0.00100713	24.7873
1611	rs6560861	IPF	M15140.metal.pos.txt.gz	G	A	G	A	0.1636	0.0022	0.1928	0.1831	0.0346732	0.0025	2.3778e-06	0.3936	24589	7368	0.000904574	22.2609
1612	rs6786378	IPF	M15140.metal.pos.txt.gz	C	A	C	A	-0.1786	-0.0019	0.159	0.147	0.0384673	0.0025	3.43537e-06	0.4588	24589	7368	0.000875909	21.5549
1613	rs7100920	IPF	M15140.metal.pos.txt.gz	C	T	C	T	-0.1744	-0.0009	0.4612	0.507	0.0272959	0.0017	1.66726e-10	0.5849	24589	7368	0.00165743	40.8189
1614	rs7138541	IPF	M15140.metal.pos.txt.gz	G	A	G	A	-0.1298	0.0024	0.3986	0.4053	0.0280337	0.0017	3.65408e-06	0.1604	24589	7368	0.000871104	21.4365
1615	rs751709	IPF	M15140.metal.pos.txt.gz	G	T	G	T	0.4781	-0.0259	0.9761	0.9813	0.100858	0.018	2.13372e-06	0.1497	24589	1764	0.000913018	22.4689
1616	rs757918	IPF	M15140.metal.pos.txt.gz	C	T	C	T	0.1254	0.0005	0.4503	0.4993	0.0272959	0.0017	4.34644e-06	0.752	24589	7368	0.000857601	21.1039
1617	rs9860874	IPF	M15140.metal.pos.txt.gz	C	A	C	A	-0.2572	-0.0044	0.7356	0.7464	0.0298253	0.0024	6.49092e-18	0.06343	24589	7368	0.00301523	74.3596
1618	rs10967305	IPF	M15335.metal.pos.txt.gz	C	T	C	T	-0.1437	-0.0006	0.4135	0.4079	0.0276121	0.0089	1.94795e-07	0.9497	24589	5606	0.00110026	27.0819
1619	rs11073517	IPF	M15335.metal.pos.txt.gz	C	T	C	T	-0.175	-0.0059	0.7296	0.6776	0.0288768	0.0097	1.35927e-09	0.5393	24589	5606	0.00149138	36.7234
1620	rs1123573	IPF	M15335.metal.pos.txt.gz	G	A	G	A	-0.1327	0.0014	0.3867	0.3901	0.0282445	0.009	2.62378e-06	0.874	24589	5606	0.000896902	22.0719
1621	rs11788059	IPF	M15335.metal.pos.txt.gz	C	T	C	T	0.1547	-0.0077	0.3648	0.3261	0.0283498	0.0096	4.84737e-08	0.4236	24589	5606	0.00120952	29.7745
1622	rs1214759	IPF	M15335.metal.pos.txt.gz	G	A	G	A	0.1652	0.0017	0.6292	0.6709	0.0292984	0.0096	1.71495e-08	0.8557	24589	5606	0.00129131	31.7906
1623	rs12610495	IPF	M15335.metal.pos.txt.gz	G	A	G	A	0.2495	-0.013	0.2942	0.292	0.0304576	0.014	2.57551e-16	0.3531	23506	4084	0.00284664	67.0983
1624	rs12753958	IPF	M15335.metal.pos.txt.gz	G	T	G	T	-0.1753	0.0102	0.8151	0.8459	0.0349894	0.0137	5.44049e-07	0.4575	24589	5606	0.00101978	25.099
1625	rs2076295	IPF	M15335.metal.pos.txt.gz	G	T	G	T	0.3966	-0.0046	0.4145	0.4467	0.0270852	0.0091	1.49989e-48	0.6104	24589	5606	0.00864432	214.391
1626	rs2197025	IPF	M15335.metal.pos.txt.gz	G	A	G	A	-0.144	0.0014	0.4483	0.4876	0.0276121	0.0106	1.83716e-07	0.8926	24589	5606	0.00110485	27.1951
1627	rs2609259	IPF	M15335.metal.pos.txt.gz	C	A	C	A	-0.2642	0.0059	0.7654	0.7829	0.0316169	0.011	6.4725e-17	0.5926	24589	5606	0.00283174	69.8218
1628	rs2967465	IPF	M15335.metal.pos.txt.gz	G	A	G	A	-0.2037	-0.005	0.1113	0.1292	0.0407858	0.0133	5.90247e-07	0.7094	24589	5606	0.0010134	24.9418
1629	rs3808803	IPF	M15335.metal.pos.txt.gz	C	T	C	T	-0.1278	0.0121	0.5358	0.5508	0.0272959	0.0089	2.8407e-06	0.1724	24589	5606	0.000890712	21.9195
1630	rs4233306	IPF	M15335.metal.pos.txt.gz	C	T	C	T	0.2068	0.0029	0.7913	0.8014	0.0349894	0.0113	3.41357e-09	0.799	24589	5606	0.00141864	34.9295
1631	rs4642211	IPF	M15335.metal.pos.txt.gz	C	T	C	T	-0.1422	-0.0096	0.3539	0.3572	0.0285606	0.0096	6.39523e-07	0.3187	24589	5606	0.00100713	24.7873
1632	rs6560861	IPF	M15335.metal.pos.txt.gz	G	A	G	A	0.1636	-0.0023	0.1928	0.1839	0.0346732	0.0116	2.3778e-06	0.8422	24589	5606	0.000904574	22.2609
1633	rs6786378	IPF	M15335.metal.pos.txt.gz	C	A	C	A	-0.1786	0.0002	0.159	0.1469	0.0384673	0.0129	3.43537e-06	0.9856	24589	5606	0.000875909	21.5549
1634	rs7100920	IPF	M15335.metal.pos.txt.gz	C	T	C	T	-0.1744	0.0238	0.4612	0.5065	0.0272959	0.009	1.66726e-10	0.008299	24589	5606	0.00165743	40.8189
1635	rs7138541	IPF	M15335.metal.pos.txt.gz	G	A	G	A	-0.1298	0	0.3986	0.4141	0.0280337	0.0094	3.65408e-06	0.996	24589	5606	0.000871104	21.4365
1636	rs751709	IPF	M15335.metal.pos.txt.gz	G	T	G	T	0.4781	-0.0618	0.9761	0.9807	0.100858	0.0792	2.13372e-06	0.4348	24589	1522	0.000913018	22.4689
1637	rs757918	IPF	M15335.metal.pos.txt.gz	C	T	C	T	0.1254	0.0089	0.4503	0.4979	0.0272959	0.009	4.34644e-06	0.3211	24589	5606	0.000857601	21.1039
1638	rs9860874	IPF	M15335.metal.pos.txt.gz	C	A	C	A	-0.2572	0.0026	0.7356	0.7461	0.0298253	0.0103	6.49092e-18	0.7997	24589	5606	0.00301523	74.3596
1639	rs10967305	IPF	M15365.metal.pos.txt.gz	C	T	C	T	-0.1437	-0.0019	0.4135	0.4081	0.0276121	0.0026	1.94795e-07	0.4609	24589	7337	0.00110026	27.0819
1640	rs11073517	IPF	M15365.metal.pos.txt.gz	C	T	C	T	-0.175	0.0018	0.7296	0.6742	0.0288768	0.0026	1.35927e-09	0.4958	24589	7337	0.00149138	36.7234
1641	rs1123573	IPF	M15365.metal.pos.txt.gz	G	A	G	A	-0.1327	0.0014	0.3867	0.3901	0.0282445	0.0026	2.62378e-06	0.5904	24589	7337	0.000896902	22.0719
1642	rs11788059	IPF	M15365.metal.pos.txt.gz	C	T	C	T	0.1547	-0.0001	0.3648	0.3255	0.0283498	0.0026	4.84737e-08	0.9678	24589	7337	0.00120952	29.7745
1643	rs1214759	IPF	M15365.metal.pos.txt.gz	G	A	G	A	0.1652	0.0022	0.6292	0.6738	0.0292984	0.0026	1.71495e-08	0.3958	24589	7337	0.00129131	31.7906
1644	rs12610495	IPF	M15365.metal.pos.txt.gz	G	A	G	A	0.2495	-0.006	0.2942	0.292	0.0304576	0.003	2.57551e-16	0.0455	23506	5577	0.00284664	67.0983
1645	rs12753958	IPF	M15365.metal.pos.txt.gz	G	T	G	T	-0.1753	-0.0055	0.8151	0.8615	0.0349894	0.0034	5.44049e-07	0.1106	24589	7337	0.00101978	25.099
1646	rs2076295	IPF	M15365.metal.pos.txt.gz	G	T	G	T	0.3966	-0.0013	0.4145	0.4459	0.0270852	0.0026	1.49989e-48	0.6323	24589	7337	0.00864432	214.391
1647	rs2197025	IPF	M15365.metal.pos.txt.gz	G	A	G	A	-0.144	0.0005	0.4483	0.4879	0.0276121	0.0026	1.83716e-07	0.8632	24589	7337	0.00110485	27.1951
1648	rs2609259	IPF	M15365.metal.pos.txt.gz	C	A	C	A	-0.2642	-0.0017	0.7654	0.7834	0.0316169	0.0027	6.4725e-17	0.5359	24589	7337	0.00283174	69.8218
1649	rs2967465	IPF	M15365.metal.pos.txt.gz	G	A	G	A	-0.2037	0.0021	0.1113	0.1319	0.0407858	0.0036	5.90247e-07	0.5647	24589	7337	0.0010134	24.9418
1650	rs3808803	IPF	M15365.metal.pos.txt.gz	C	T	C	T	-0.1278	0.0028	0.5358	0.5518	0.0272959	0.0026	2.8407e-06	0.2845	24589	7337	0.000890712	21.9195
1651	rs4233306	IPF	M15365.metal.pos.txt.gz	C	T	C	T	0.2068	0.0006	0.7913	0.8014	0.0349894	0.0027	3.41357e-09	0.8342	24589	7337	0.00141864	34.9295
1652	rs4642211	IPF	M15365.metal.pos.txt.gz	C	T	C	T	-0.1422	-0.0011	0.3539	0.362	0.0285606	0.0026	6.39523e-07	0.6884	24589	7337	0.00100713	24.7873
1653	rs6560861	IPF	M15365.metal.pos.txt.gz	G	A	G	A	0.1636	0.0078	0.1928	0.1831	0.0346732	0.0028	2.3778e-06	0.004917	24589	7337	0.000904574	22.2609
1654	rs6786378	IPF	M15365.metal.pos.txt.gz	C	A	C	A	-0.1786	0.0055	0.159	0.1471	0.0384673	0.0035	3.43537e-06	0.1212	24589	7337	0.000875909	21.5549
1655	rs7100920	IPF	M15365.metal.pos.txt.gz	C	T	C	T	-0.1744	0.0041	0.4612	0.507	0.0272959	0.0026	1.66726e-10	0.115	24589	7337	0.00165743	40.8189
1656	rs7138541	IPF	M15365.metal.pos.txt.gz	G	A	G	A	-0.1298	0.0017	0.3986	0.405	0.0280337	0.0026	3.65408e-06	0.5226	24589	7337	0.000871104	21.4365
1657	rs751709	IPF	M15365.metal.pos.txt.gz	G	T	G	T	0.4781	0.0068	0.9761	0.9813	0.100858	0.0274	2.13372e-06	0.8035	24589	1760	0.000913018	22.4689
1658	rs757918	IPF	M15365.metal.pos.txt.gz	C	T	C	T	0.1254	0.0015	0.4503	0.4995	0.0272959	0.0026	4.34644e-06	0.567	24589	7337	0.000857601	21.1039
1659	rs9860874	IPF	M15365.metal.pos.txt.gz	C	A	C	A	-0.2572	0.0014	0.7356	0.7475	0.0298253	0.0027	6.49092e-18	0.5989	24589	7337	0.00301523	74.3596
1660	rs10967305	IPF	M15488.metal.pos.txt.gz	C	T	C	T	-0.1437	-0.0007	0.4135	0.4086	0.0276121	0.0016	1.94795e-07	0.6697	24589	7345	0.00110026	27.0819
1661	rs11073517	IPF	M15488.metal.pos.txt.gz	C	T	C	T	-0.175	-0.0012	0.7296	0.6788	0.0288768	0.0016	1.35927e-09	0.458	24589	7345	0.00149138	36.7234
1662	rs1123573	IPF	M15488.metal.pos.txt.gz	G	A	G	A	-0.1327	0.0001	0.3867	0.3918	0.0282445	0.0016	2.62378e-06	0.9449	24589	7345	0.000896902	22.0719
1663	rs11788059	IPF	M15488.metal.pos.txt.gz	C	T	C	T	0.1547	0.0002	0.3648	0.3243	0.0283498	0.0016	4.84737e-08	0.9052	24589	7345	0.00120952	29.7745
1664	rs1214759	IPF	M15488.metal.pos.txt.gz	G	A	G	A	0.1652	-0.0016	0.6292	0.6699	0.0292984	0.0016	1.71495e-08	0.3023	24589	7345	0.00129131	31.7906
1665	rs12610495	IPF	M15488.metal.pos.txt.gz	G	A	G	A	0.2495	-0.004	0.2942	0.292	0.0304576	0.002	2.57551e-16	0.0455	23506	5583	0.00284664	67.0983
1666	rs12753958	IPF	M15488.metal.pos.txt.gz	G	T	G	T	-0.1753	-0.0021	0.8151	0.847	0.0349894	0.0022	5.44049e-07	0.3358	24589	7345	0.00101978	25.099
1667	rs2076295	IPF	M15488.metal.pos.txt.gz	G	T	G	T	0.3966	-0.0001	0.4145	0.4482	0.0270852	0.0016	1.49989e-48	0.9652	24589	7345	0.00864432	214.391
1668	rs2197025	IPF	M15488.metal.pos.txt.gz	G	A	G	A	-0.144	-0.0005	0.4483	0.4881	0.0276121	0.0016	1.83716e-07	0.7421	24589	7345	0.00110485	27.1951
1669	rs2609259	IPF	M15488.metal.pos.txt.gz	C	A	C	A	-0.2642	0.0017	0.7654	0.7829	0.0316169	0.0017	6.4725e-17	0.3059	24589	7345	0.00283174	69.8218
1670	rs2967465	IPF	M15488.metal.pos.txt.gz	G	A	G	A	-0.2037	-0.0018	0.1113	0.1282	0.0407858	0.0024	5.90247e-07	0.441	24589	7345	0.0010134	24.9418
1671	rs3808803	IPF	M15488.metal.pos.txt.gz	C	T	C	T	-0.1278	-0.003	0.5358	0.5502	0.0272959	0.0016	2.8407e-06	0.05808	24589	7345	0.000890712	21.9195
1672	rs4233306	IPF	M15488.metal.pos.txt.gz	C	T	C	T	0.2068	-0.0037	0.7913	0.8015	0.0349894	0.0017	3.41357e-09	0.02951	24589	7345	0.00141864	34.9295
1673	rs4642211	IPF	M15488.metal.pos.txt.gz	C	T	C	T	-0.1422	0.0001	0.3539	0.3563	0.0285606	0.0016	6.39523e-07	0.9546	24589	7345	0.00100713	24.7873
1674	rs6560861	IPF	M15488.metal.pos.txt.gz	G	A	G	A	0.1636	0.0005	0.1928	0.1832	0.0346732	0.0017	2.3778e-06	0.7761	24589	7345	0.000904574	22.2609
1675	rs6786378	IPF	M15488.metal.pos.txt.gz	C	A	C	A	-0.1786	0.0018	0.159	0.1466	0.0384673	0.0023	3.43537e-06	0.4438	24589	7345	0.000875909	21.5549
1676	rs7100920	IPF	M15488.metal.pos.txt.gz	C	T	C	T	-0.1744	0.0009	0.4612	0.5086	0.0272959	0.0016	1.66726e-10	0.5848	24589	7345	0.00165743	40.8189
1677	rs7138541	IPF	M15488.metal.pos.txt.gz	G	A	G	A	-0.1298	0.0031	0.3986	0.4119	0.0280337	0.0016	3.65408e-06	0.05114	24589	7345	0.000871104	21.4365
1678	rs751709	IPF	M15488.metal.pos.txt.gz	G	T	G	T	0.4781	-0.0071	0.9761	0.9813	0.100858	0.0133	2.13372e-06	0.5928	24589	1762	0.000913018	22.4689
1679	rs757918	IPF	M15488.metal.pos.txt.gz	C	T	C	T	0.1254	-0.0022	0.4503	0.4983	0.0272959	0.0016	4.34644e-06	0.1544	24589	7345	0.000857601	21.1039
1680	rs9860874	IPF	M15488.metal.pos.txt.gz	C	A	C	A	-0.2572	0.0027	0.7356	0.7465	0.0298253	0.0016	6.49092e-18	0.09645	24589	7345	0.00301523	74.3596
1681	rs10967305	IPF	M15500.metal.pos.txt.gz	C	T	C	T	-0.1437	0.0007	0.4135	0.4077	0.0276121	0.0009	1.94795e-07	0.4454	24589	7349	0.00110026	27.0819
1682	rs11073517	IPF	M15500.metal.pos.txt.gz	C	T	C	T	-0.175	-0.0031	0.7296	0.6825	0.0288768	0.0015	1.35927e-09	0.03517	24589	7349	0.00149138	36.7234
1683	rs1123573	IPF	M15500.metal.pos.txt.gz	G	A	G	A	-0.1327	-0.0001	0.3867	0.3894	0.0282445	0.0009	2.62378e-06	0.8804	24589	7349	0.000896902	22.0719
1684	rs11788059	IPF	M15500.metal.pos.txt.gz	C	T	C	T	0.1547	-0.0007	0.3648	0.3261	0.0283498	0.0009	4.84737e-08	0.4121	24589	7349	0.00120952	29.7745
1685	rs1214759	IPF	M15500.metal.pos.txt.gz	G	A	G	A	0.1652	-0.003	0.6292	0.6672	0.0292984	0.0015	1.71495e-08	0.04074	24589	7349	0.00129131	31.7906
1686	rs12610495	IPF	M15500.metal.pos.txt.gz	G	A	G	A	0.2495	0	0.2942	0.292	0.0304576	0.002	2.57551e-16	1	23506	5590	0.00284664	67.0983
1687	rs12753958	IPF	M15500.metal.pos.txt.gz	G	T	G	T	-0.1753	-0.0012	0.8151	0.8541	0.0349894	0.0016	5.44049e-07	0.4364	24589	7349	0.00101978	25.099
1688	rs2076295	IPF	M15500.metal.pos.txt.gz	G	T	G	T	0.3966	0.0011	0.4145	0.4449	0.0270852	0.0009	1.49989e-48	0.2182	24589	7349	0.00864432	214.391
1689	rs2197025	IPF	M15500.metal.pos.txt.gz	G	A	G	A	-0.144	0.0004	0.4483	0.4883	0.0276121	0.0015	1.83716e-07	0.7763	24589	7349	0.00110485	27.1951
1690	rs2609259	IPF	M15500.metal.pos.txt.gz	C	A	C	A	-0.2642	-0.0006	0.7654	0.7822	0.0316169	0.0015	6.4725e-17	0.6751	24589	7349	0.00283174	69.8218
1691	rs2967465	IPF	M15500.metal.pos.txt.gz	G	A	G	A	-0.2037	-0.0017	0.1113	0.1302	0.0407858	0.0017	5.90247e-07	0.311	24589	7349	0.0010134	24.9418
1692	rs3808803	IPF	M15500.metal.pos.txt.gz	C	T	C	T	-0.1278	-0.0015	0.5358	0.5525	0.0272959	0.0009	2.8407e-06	0.1001	24589	7349	0.000890712	21.9195
1693	rs4233306	IPF	M15500.metal.pos.txt.gz	C	T	C	T	0.2068	-0.0011	0.7913	0.802	0.0349894	0.0016	3.41357e-09	0.5	24589	7349	0.00141864	34.9295
1694	rs4642211	IPF	M15500.metal.pos.txt.gz	C	T	C	T	-0.1422	-0.001	0.3539	0.3645	0.0285606	0.0009	6.39523e-07	0.2632	24589	7349	0.00100713	24.7873
1695	rs6560861	IPF	M15500.metal.pos.txt.gz	G	A	G	A	0.1636	0.0026	0.1928	0.1832	0.0346732	0.0016	2.3778e-06	0.1169	24589	7349	0.000904574	22.2609
1696	rs6786378	IPF	M15500.metal.pos.txt.gz	C	A	C	A	-0.1786	-0.0024	0.159	0.1468	0.0384673	0.0017	3.43537e-06	0.1439	24589	7349	0.000875909	21.5549
1697	rs7100920	IPF	M15500.metal.pos.txt.gz	C	T	C	T	-0.1744	0.0015	0.4612	0.5057	0.0272959	0.0009	1.66726e-10	0.08646	24589	7349	0.00165743	40.8189
1698	rs7138541	IPF	M15500.metal.pos.txt.gz	G	A	G	A	-0.1298	-0.0005	0.3986	0.4019	0.0280337	0.0009	3.65408e-06	0.5841	24589	7349	0.000871104	21.4365
1699	rs751709	IPF	M15500.metal.pos.txt.gz	G	T	G	T	0.4781	-0.0028	0.9761	0.9814	0.100858	0.0109	2.13372e-06	0.8005	24589	1759	0.000913018	22.4689
1700	rs757918	IPF	M15500.metal.pos.txt.gz	C	T	C	T	0.1254	0.0023	0.4503	0.5002	0.0272959	0.0009	4.34644e-06	0.009317	24589	7349	0.000857601	21.1039
1701	rs9860874	IPF	M15500.metal.pos.txt.gz	C	A	C	A	-0.2572	0.0007	0.7356	0.7459	0.0298253	0.0015	6.49092e-18	0.6356	24589	7349	0.00301523	74.3596
1702	rs10967305	IPF	M15506.metal.pos.txt.gz	C	T	C	T	-0.1437	-0.0003	0.4135	0.4094	0.0276121	0.0014	1.94795e-07	0.8184	24589	7310	0.00110026	27.0819
1703	rs11073517	IPF	M15506.metal.pos.txt.gz	C	T	C	T	-0.175	-0.0007	0.7296	0.6828	0.0288768	0.0015	1.35927e-09	0.6392	24589	7310	0.00149138	36.7234
1704	rs1123573	IPF	M15506.metal.pos.txt.gz	G	A	G	A	-0.1327	0.0009	0.3867	0.3934	0.0282445	0.0014	2.62378e-06	0.5071	24589	7310	0.000896902	22.0719
1705	rs11788059	IPF	M15506.metal.pos.txt.gz	C	T	C	T	0.1547	-0.001	0.3648	0.3228	0.0283498	0.0015	4.84737e-08	0.4749	24589	7310	0.00120952	29.7745
1706	rs1214759	IPF	M15506.metal.pos.txt.gz	G	A	G	A	0.1652	0.0016	0.6292	0.6667	0.0292984	0.0014	1.71495e-08	0.2649	24589	7310	0.00129131	31.7906
1707	rs12610495	IPF	M15506.metal.pos.txt.gz	G	A	G	A	0.2495	-0.001	0.2942	0.292	0.0304576	0.002	2.57551e-16	0.6171	23506	5548	0.00284664	67.0983
1708	rs12753958	IPF	M15506.metal.pos.txt.gz	G	T	G	T	-0.1753	-0.0015	0.8151	0.8379	0.0349894	0.002	5.44049e-07	0.4545	24589	7310	0.00101978	25.099
1709	rs2076295	IPF	M15506.metal.pos.txt.gz	G	T	G	T	0.3966	-0.0012	0.4145	0.4501	0.0270852	0.0014	1.49989e-48	0.4195	24589	7310	0.00864432	214.391
1710	rs2197025	IPF	M15506.metal.pos.txt.gz	G	A	G	A	-0.144	0.0011	0.4483	0.4879	0.0276121	0.0015	1.83716e-07	0.4326	24589	7310	0.00110485	27.1951
1711	rs2609259	IPF	M15506.metal.pos.txt.gz	C	A	C	A	-0.2642	-0.0013	0.7654	0.7821	0.0316169	0.0015	6.4725e-17	0.3848	24589	7310	0.00283174	69.8218
1712	rs2967465	IPF	M15506.metal.pos.txt.gz	G	A	G	A	-0.2037	-0.0024	0.1113	0.126	0.0407858	0.0022	5.90247e-07	0.2715	24589	7310	0.0010134	24.9418
1713	rs3808803	IPF	M15506.metal.pos.txt.gz	C	T	C	T	-0.1278	-0.0007	0.5358	0.5488	0.0272959	0.0014	2.8407e-06	0.6126	24589	7310	0.000890712	21.9195
1714	rs4233306	IPF	M15506.metal.pos.txt.gz	C	T	C	T	0.2068	0.0001	0.7913	0.8017	0.0349894	0.0016	3.41357e-09	0.9501	24589	7310	0.00141864	34.9295
1715	rs4642211	IPF	M15506.metal.pos.txt.gz	C	T	C	T	-0.1422	0.0001	0.3539	0.3516	0.0285606	0.0014	6.39523e-07	0.9651	24589	7310	0.00100713	24.7873
1716	rs6560861	IPF	M15506.metal.pos.txt.gz	G	A	G	A	0.1636	-0.0005	0.1928	0.1831	0.0346732	0.0016	2.3778e-06	0.7696	24589	7310	0.000904574	22.2609
1717	rs6786378	IPF	M15506.metal.pos.txt.gz	C	A	C	A	-0.1786	-0.0018	0.159	0.1461	0.0384673	0.0021	3.43537e-06	0.3856	24589	7310	0.000875909	21.5549
1718	rs7100920	IPF	M15506.metal.pos.txt.gz	C	T	C	T	-0.1744	0.0013	0.4612	0.5111	0.0272959	0.0014	1.66726e-10	0.352	24589	7310	0.00165743	40.8189
1719	rs7138541	IPF	M15506.metal.pos.txt.gz	G	A	G	A	-0.1298	-0.001	0.3986	0.4179	0.0280337	0.0014	3.65408e-06	0.4726	24589	7310	0.000871104	21.4365
1720	rs751709	IPF	M15506.metal.pos.txt.gz	G	T	G	T	0.4781	-0.0028	0.9761	0.9813	0.100858	0.0106	2.13372e-06	0.7924	24589	1762	0.000913018	22.4689
1721	rs757918	IPF	M15506.metal.pos.txt.gz	C	T	C	T	0.1254	0.0007	0.4503	0.4972	0.0272959	0.0014	4.34644e-06	0.613	24589	7310	0.000857601	21.1039
1722	rs9860874	IPF	M15506.metal.pos.txt.gz	C	A	C	A	-0.2572	-0.0005	0.7356	0.7462	0.0298253	0.0015	6.49092e-18	0.7461	24589	7310	0.00301523	74.3596
1723	rs10967305	IPF	M15630.metal.pos.txt.gz	C	T	C	T	-0.1437	0.0055	0.4135	0.4084	0.0276121	0.0042	1.94795e-07	0.1834	24589	7146	0.00110026	27.0819
1724	rs11073517	IPF	M15630.metal.pos.txt.gz	C	T	C	T	-0.175	-0.003	0.7296	0.6756	0.0288768	0.0043	1.35927e-09	0.4789	24589	7146	0.00149138	36.7234
1725	rs1123573	IPF	M15630.metal.pos.txt.gz	G	A	G	A	-0.1327	-0.0008	0.3867	0.3905	0.0282445	0.0042	2.62378e-06	0.849	24589	7146	0.000896902	22.0719
1726	rs11788059	IPF	M15630.metal.pos.txt.gz	C	T	C	T	0.1547	-0.0073	0.3648	0.3253	0.0283498	0.0042	4.84737e-08	0.08404	24589	7146	0.00120952	29.7745
1727	rs1214759	IPF	M15630.metal.pos.txt.gz	G	A	G	A	0.1652	-0.003	0.6292	0.6719	0.0292984	0.0042	1.71495e-08	0.4767	24589	7146	0.00129131	31.7906
1728	rs12610495	IPF	M15630.metal.pos.txt.gz	G	A	G	A	0.2495	-0.012	0.2942	0.292	0.0304576	0.006	2.57551e-16	0.0455	23506	5395	0.00284664	67.0983
1729	rs12753958	IPF	M15630.metal.pos.txt.gz	G	T	G	T	-0.1753	-0.009	0.8151	0.8512	0.0349894	0.0062	5.44049e-07	0.1466	24589	7146	0.00101978	25.099
1730	rs2076295	IPF	M15630.metal.pos.txt.gz	G	T	G	T	0.3966	0.0063	0.4145	0.4462	0.0270852	0.0042	1.49989e-48	0.1388	24589	7146	0.00864432	214.391
1731	rs2197025	IPF	M15630.metal.pos.txt.gz	G	A	G	A	-0.144	-0.0132	0.4483	0.4879	0.0276121	0.0048	1.83716e-07	0.006259	24589	7146	0.00110485	27.1951
1732	rs2609259	IPF	M15630.metal.pos.txt.gz	C	A	C	A	-0.2642	0.0003	0.7654	0.7826	0.0316169	0.005	6.4725e-17	0.9483	24589	7146	0.00283174	69.8218
1733	rs2967465	IPF	M15630.metal.pos.txt.gz	G	A	G	A	-0.2037	-0.0212	0.1113	0.1307	0.0407858	0.0061	5.90247e-07	0.0004569	24589	7146	0.0010134	24.9418
1734	rs3808803	IPF	M15630.metal.pos.txt.gz	C	T	C	T	-0.1278	-0.0044	0.5358	0.5511	0.0272959	0.0042	2.8407e-06	0.2866	24589	7146	0.000890712	21.9195
1735	rs4233306	IPF	M15630.metal.pos.txt.gz	C	T	C	T	0.2068	-0.0054	0.7913	0.8015	0.0349894	0.0051	3.41357e-09	0.2941	24589	7146	0.00141864	34.9295
1736	rs4642211	IPF	M15630.metal.pos.txt.gz	C	T	C	T	-0.1422	0.0012	0.3539	0.36	0.0285606	0.0042	6.39523e-07	0.7722	24589	7146	0.00100713	24.7873
1737	rs6560861	IPF	M15630.metal.pos.txt.gz	G	A	G	A	0.1636	0.001	0.1928	0.183	0.0346732	0.0052	2.3778e-06	0.8447	24589	7146	0.000904574	22.2609
1738	rs6786378	IPF	M15630.metal.pos.txt.gz	C	A	C	A	-0.1786	-0.0001	0.159	0.147	0.0384673	0.0059	3.43537e-06	0.991	24589	7146	0.000875909	21.5549
1739	rs7100920	IPF	M15630.metal.pos.txt.gz	C	T	C	T	-0.1744	-0.0052	0.4612	0.5073	0.0272959	0.0042	1.66726e-10	0.2208	24589	7146	0.00165743	40.8189
1740	rs7138541	IPF	M15630.metal.pos.txt.gz	G	A	G	A	-0.1298	0.0026	0.3986	0.4073	0.0280337	0.0042	3.65408e-06	0.5399	24589	7146	0.000871104	21.4365
1741	rs751709	IPF	M15630.metal.pos.txt.gz	G	T	G	T	0.4781	-0.0543	0.9761	0.9812	0.100858	0.0403	2.13372e-06	0.1781	24589	1751	0.000913018	22.4689
1742	rs757918	IPF	M15630.metal.pos.txt.gz	C	T	C	T	0.1254	-0.0046	0.4503	0.499	0.0272959	0.0042	4.34644e-06	0.271	24589	7146	0.000857601	21.1039
1743	rs9860874	IPF	M15630.metal.pos.txt.gz	C	A	C	A	-0.2572	-0.0025	0.7356	0.747	0.0298253	0.0043	6.49092e-18	0.5687	24589	7146	0.00301523	74.3596
1744	rs10967305	IPF	M15650.metal.pos.txt.gz	C	T	C	T	-0.1437	0.0001	0.4135	0.4086	0.0276121	0.0012	1.94795e-07	0.9323	24589	7365	0.00110026	27.0819
1745	rs11073517	IPF	M15650.metal.pos.txt.gz	C	T	C	T	-0.175	-0.0016	0.7296	0.6781	0.0288768	0.0012	1.35927e-09	0.1934	24589	7365	0.00149138	36.7234
1746	rs1123573	IPF	M15650.metal.pos.txt.gz	G	A	G	A	-0.1327	-0.0005	0.3867	0.3915	0.0282445	0.0012	2.62378e-06	0.6894	24589	7365	0.000896902	22.0719
1747	rs11788059	IPF	M15650.metal.pos.txt.gz	C	T	C	T	0.1547	-0.0022	0.3648	0.3246	0.0283498	0.0012	4.84737e-08	0.06838	24589	7365	0.00120952	29.7745
1748	rs1214759	IPF	M15650.metal.pos.txt.gz	G	A	G	A	0.1652	0.0023	0.6292	0.6705	0.0292984	0.0012	1.71495e-08	0.0569	24589	7365	0.00129131	31.7906
1749	rs12610495	IPF	M15650.metal.pos.txt.gz	G	A	G	A	0.2495	-0.003	0.2942	0.292	0.0304576	0.003	2.57551e-16	0.3117	23506	5602	0.00284664	67.0983
1750	rs12753958	IPF	M15650.metal.pos.txt.gz	G	T	G	T	-0.1753	0.0014	0.8151	0.8377	0.0349894	0.0019	5.44049e-07	0.4649	24589	7365	0.00101978	25.099
1751	rs2076295	IPF	M15650.metal.pos.txt.gz	G	T	G	T	0.3966	-0.0025	0.4145	0.4477	0.0270852	0.0012	1.49989e-48	0.03502	24589	7365	0.00864432	214.391
1752	rs2197025	IPF	M15650.metal.pos.txt.gz	G	A	G	A	-0.144	0.0006	0.4483	0.4882	0.0276121	0.0017	1.83716e-07	0.7416	24589	7365	0.00110485	27.1951
1753	rs2609259	IPF	M15650.metal.pos.txt.gz	C	A	C	A	-0.2642	-0.0029	0.7654	0.7815	0.0316169	0.0018	6.4725e-17	0.1074	24589	7365	0.00283174	69.8218
1754	rs2967465	IPF	M15650.metal.pos.txt.gz	G	A	G	A	-0.2037	-0.0017	0.1113	0.1257	0.0407858	0.0021	5.90247e-07	0.4152	24589	7365	0.0010134	24.9418
1755	rs3808803	IPF	M15650.metal.pos.txt.gz	C	T	C	T	-0.1278	-0.0012	0.5358	0.5504	0.0272959	0.0012	2.8407e-06	0.3049	24589	7365	0.000890712	21.9195
1756	rs4233306	IPF	M15650.metal.pos.txt.gz	C	T	C	T	0.2068	-0.0008	0.7913	0.8021	0.0349894	0.0019	3.41357e-09	0.6862	24589	7365	0.00141864	34.9295
1757	rs4642211	IPF	M15650.metal.pos.txt.gz	C	T	C	T	-0.1422	0.0006	0.3539	0.3573	0.0285606	0.0012	6.39523e-07	0.6294	24589	7365	0.00100713	24.7873
1758	rs6560861	IPF	M15650.metal.pos.txt.gz	G	A	G	A	0.1636	0.0006	0.1928	0.1831	0.0346732	0.002	2.3778e-06	0.7673	24589	7365	0.000904574	22.2609
1759	rs6786378	IPF	M15650.metal.pos.txt.gz	C	A	C	A	-0.1786	0.0012	0.159	0.1462	0.0384673	0.002	3.43537e-06	0.569	24589	7365	0.000875909	21.5549
1760	rs7100920	IPF	M15650.metal.pos.txt.gz	C	T	C	T	-0.1744	-0.0001	0.4612	0.5086	0.0272959	0.0012	1.66726e-10	0.9632	24589	7365	0.00165743	40.8189
1761	rs7138541	IPF	M15650.metal.pos.txt.gz	G	A	G	A	-0.1298	-0.0004	0.3986	0.4107	0.0280337	0.0012	3.65408e-06	0.7087	24589	7365	0.000871104	21.4365
1762	rs751709	IPF	M15650.metal.pos.txt.gz	G	T	G	T	0.4781	-0.0024	0.9761	0.9813	0.100858	0.0103	2.13372e-06	0.8188	24589	1763	0.000913018	22.4689
1763	rs757918	IPF	M15650.metal.pos.txt.gz	C	T	C	T	0.1254	0.0005	0.4503	0.498	0.0272959	0.0012	4.34644e-06	0.6521	24589	7365	0.000857601	21.1039
1764	rs9860874	IPF	M15650.metal.pos.txt.gz	C	A	C	A	-0.2572	-0.0019	0.7356	0.7469	0.0298253	0.0012	6.49092e-18	0.1231	24589	7365	0.00301523	74.3596
1765	rs10967305	IPF	M15676.metal.pos.txt.gz	C	T	C	T	-0.1437	0.002	0.4135	0.4081	0.0276121	0.0017	1.94795e-07	0.2429	24589	7331	0.00110026	27.0819
1766	rs11073517	IPF	M15676.metal.pos.txt.gz	C	T	C	T	-0.175	0.0003	0.7296	0.6812	0.0288768	0.0023	1.35927e-09	0.8949	24589	7331	0.00149138	36.7234
1767	rs1123573	IPF	M15676.metal.pos.txt.gz	G	A	G	A	-0.1327	-0.0028	0.3867	0.3904	0.0282445	0.0017	2.62378e-06	0.1007	24589	7331	0.000896902	22.0719
1768	rs11788059	IPF	M15676.metal.pos.txt.gz	C	T	C	T	0.1547	-0.0017	0.3648	0.3235	0.0283498	0.0023	4.84737e-08	0.4599	24589	7331	0.00120952	29.7745
1769	rs1214759	IPF	M15676.metal.pos.txt.gz	G	A	G	A	0.1652	0.0005	0.6292	0.668	0.0292984	0.0022	1.71495e-08	0.8213	24589	7331	0.00129131	31.7906
1770	rs12610495	IPF	M15676.metal.pos.txt.gz	G	A	G	A	0.2495	0	0.2942	0.292	0.0304576	0.003	2.57551e-16	1	23506	5566	0.00284664	67.0983
1771	rs12753958	IPF	M15676.metal.pos.txt.gz	G	T	G	T	-0.1753	0.0018	0.8151	0.8458	0.0349894	0.0029	5.44049e-07	0.5378	24589	7331	0.00101978	25.099
1772	rs2076295	IPF	M15676.metal.pos.txt.gz	G	T	G	T	0.3966	0.0018	0.4145	0.4463	0.0270852	0.0017	1.49989e-48	0.2966	24589	7331	0.00864432	214.391
1773	rs2197025	IPF	M15676.metal.pos.txt.gz	G	A	G	A	-0.144	-0.0015	0.4483	0.488	0.0276121	0.0023	1.83716e-07	0.5072	24589	7331	0.00110485	27.1951
1774	rs2609259	IPF	M15676.metal.pos.txt.gz	C	A	C	A	-0.2642	-0.0024	0.7654	0.7825	0.0316169	0.0024	6.4725e-17	0.3045	24589	7331	0.00283174	69.8218
1775	rs2967465	IPF	M15676.metal.pos.txt.gz	G	A	G	A	-0.2037	-0.0017	0.1113	0.1279	0.0407858	0.0032	5.90247e-07	0.5908	24589	7331	0.0010134	24.9418
1776	rs3808803	IPF	M15676.metal.pos.txt.gz	C	T	C	T	-0.1278	0.0004	0.5358	0.5516	0.0272959	0.0017	2.8407e-06	0.8368	24589	7331	0.000890712	21.9195
1777	rs4233306	IPF	M15676.metal.pos.txt.gz	C	T	C	T	0.2068	0.0026	0.7913	0.8016	0.0349894	0.0024	3.41357e-09	0.2784	24589	7331	0.00141864	34.9295
1778	rs4642211	IPF	M15676.metal.pos.txt.gz	C	T	C	T	-0.1422	-0.0023	0.3539	0.3534	0.0285606	0.0023	6.39523e-07	0.3153	24589	7331	0.00100713	24.7873
1779	rs6560861	IPF	M15676.metal.pos.txt.gz	G	A	G	A	0.1636	-0.0027	0.1928	0.1831	0.0346732	0.0025	2.3778e-06	0.2867	24589	7331	0.000904574	22.2609
1780	rs6786378	IPF	M15676.metal.pos.txt.gz	C	A	C	A	-0.1786	-0.0048	0.159	0.1465	0.0384673	0.003	3.43537e-06	0.1134	24589	7331	0.000875909	21.5549
1781	rs7100920	IPF	M15676.metal.pos.txt.gz	C	T	C	T	-0.1744	0.0018	0.4612	0.5072	0.0272959	0.0017	1.66726e-10	0.3003	24589	7331	0.00165743	40.8189
1782	rs7138541	IPF	M15676.metal.pos.txt.gz	G	A	G	A	-0.1298	-0.0019	0.3986	0.4061	0.0280337	0.0017	3.65408e-06	0.2755	24589	7331	0.000871104	21.4365
1783	rs751709	IPF	M15676.metal.pos.txt.gz	G	T	G	T	0.4781	0.0216	0.9761	0.9813	0.100858	0.0173	2.13372e-06	0.2128	24589	1765	0.000913018	22.4689
1784	rs757918	IPF	M15676.metal.pos.txt.gz	C	T	C	T	0.1254	0.0007	0.4503	0.4992	0.0272959	0.0017	4.34644e-06	0.6737	24589	7331	0.000857601	21.1039
1785	rs9860874	IPF	M15676.metal.pos.txt.gz	C	A	C	A	-0.2572	-0.0044	0.7356	0.7461	0.0298253	0.0023	6.49092e-18	0.05821	24589	7331	0.00301523	74.3596
1786	rs10967305	IPF	M15677.metal.pos.txt.gz	C	T	C	T	-0.1437	0.0004	0.4135	0.408	0.0276121	0.008	1.94795e-07	0.9595	24589	5502	0.00110026	27.0819
1787	rs11073517	IPF	M15677.metal.pos.txt.gz	C	T	C	T	-0.175	0.0138	0.7296	0.6734	0.0288768	0.009	1.35927e-09	0.1231	24589	5502	0.00149138	36.7234
1788	rs1123573	IPF	M15677.metal.pos.txt.gz	G	A	G	A	-0.1327	0.0096	0.3867	0.388	0.0282445	0.0082	2.62378e-06	0.2392	24589	5502	0.000896902	22.0719
1789	rs11788059	IPF	M15677.metal.pos.txt.gz	C	T	C	T	0.1547	0.0072	0.3648	0.3289	0.0283498	0.0089	4.84737e-08	0.4208	24589	5502	0.00120952	29.7745
1790	rs1214759	IPF	M15677.metal.pos.txt.gz	G	A	G	A	0.1652	0.0013	0.6292	0.6739	0.0292984	0.0089	1.71495e-08	0.8808	24589	5502	0.00129131	31.7906
1791	rs12610495	IPF	M15677.metal.pos.txt.gz	G	A	G	A	0.2495	0.007	0.2942	0.292	0.0304576	0.012	2.57551e-16	0.5597	23506	4844	0.00284664	67.0983
1792	rs12753958	IPF	M15677.metal.pos.txt.gz	G	T	G	T	-0.1753	0.0029	0.8151	0.8616	0.0349894	0.0129	5.44049e-07	0.823	24589	5502	0.00101978	25.099
1793	rs2076295	IPF	M15677.metal.pos.txt.gz	G	T	G	T	0.3966	-0.0043	0.4145	0.4469	0.0270852	0.0081	1.49989e-48	0.5965	24589	5502	0.00864432	214.391
1794	rs2197025	IPF	M15677.metal.pos.txt.gz	G	A	G	A	-0.144	0.0005	0.4483	0.4871	0.0276121	0.0096	1.83716e-07	0.9626	24589	5502	0.00110485	27.1951
1795	rs2609259	IPF	M15677.metal.pos.txt.gz	C	A	C	A	-0.2642	-0.0062	0.7654	0.7853	0.0316169	0.0099	6.4725e-17	0.5269	24589	5502	0.00283174	69.8218
1796	rs2967465	IPF	M15677.metal.pos.txt.gz	G	A	G	A	-0.2037	-0.0189	0.1113	0.1305	0.0407858	0.012	5.90247e-07	0.1154	24589	5502	0.0010134	24.9418
1797	rs3808803	IPF	M15677.metal.pos.txt.gz	C	T	C	T	-0.1278	-0.0092	0.5358	0.5486	0.0272959	0.0081	2.8407e-06	0.2576	24589	5502	0.000890712	21.9195
1798	rs4233306	IPF	M15677.metal.pos.txt.gz	C	T	C	T	0.2068	0.0113	0.7913	0.7988	0.0349894	0.01	3.41357e-09	0.2556	24589	5502	0.00141864	34.9295
1799	rs4642211	IPF	M15677.metal.pos.txt.gz	C	T	C	T	-0.1422	0.0028	0.3539	0.363	0.0285606	0.009	6.39523e-07	0.7542	24589	5502	0.00100713	24.7873
1800	rs6560861	IPF	M15677.metal.pos.txt.gz	G	A	G	A	0.1636	0.0177	0.1928	0.1819	0.0346732	0.0109	2.3778e-06	0.1048	24589	5502	0.000904574	22.2609
1801	rs6786378	IPF	M15677.metal.pos.txt.gz	C	A	C	A	-0.1786	-0.0223	0.159	0.1469	0.0384673	0.0117	3.43537e-06	0.05791	24589	5502	0.000875909	21.5549
1802	rs7100920	IPF	M15677.metal.pos.txt.gz	C	T	C	T	-0.1744	-0.0002	0.4612	0.5064	0.0272959	0.0082	1.66726e-10	0.9777	24589	5502	0.00165743	40.8189
1803	rs7138541	IPF	M15677.metal.pos.txt.gz	G	A	G	A	-0.1298	-0.0096	0.3986	0.4016	0.0280337	0.0081	3.65408e-06	0.2385	24589	5502	0.000871104	21.4365
1804	rs751709	IPF	M15677.metal.pos.txt.gz	G	T	G	T	0.4781	0.0847	0.9761	0.9815	0.100858	0.0985	2.13372e-06	0.3899	24589	658	0.000913018	22.4689
1805	rs757918	IPF	M15677.metal.pos.txt.gz	C	T	C	T	0.1254	-0.0018	0.4503	0.5028	0.0272959	0.0082	4.34644e-06	0.8282	24589	5502	0.000857601	21.1039
1806	rs9860874	IPF	M15677.metal.pos.txt.gz	C	A	C	A	-0.2572	0.0159	0.7356	0.7483	0.0298253	0.009	6.49092e-18	0.07864	24589	5502	0.00301523	74.3596
1807	rs10967305	IPF	M15749.metal.pos.txt.gz	C	T	C	T	-0.1437	-0.0049	0.4135	0.4083	0.0276121	0.0044	1.94795e-07	0.2659	24589	5829	0.00110026	27.0819
1808	rs11073517	IPF	M15749.metal.pos.txt.gz	C	T	C	T	-0.175	0.0006	0.7296	0.6739	0.0288768	0.0045	1.35927e-09	0.8925	24589	5829	0.00149138	36.7234
1809	rs1123573	IPF	M15749.metal.pos.txt.gz	G	A	G	A	-0.1327	-0.0019	0.3867	0.3893	0.0282445	0.0045	2.62378e-06	0.6641	24589	5829	0.000896902	22.0719
1810	rs11788059	IPF	M15749.metal.pos.txt.gz	C	T	C	T	0.1547	0.0053	0.3648	0.3269	0.0283498	0.0045	4.84737e-08	0.2376	24589	5829	0.00120952	29.7745
1811	rs1214759	IPF	M15749.metal.pos.txt.gz	G	A	G	A	0.1652	-0.0087	0.6292	0.673	0.0292984	0.0045	1.71495e-08	0.05081	24589	5829	0.00129131	31.7906
1812	rs12610495	IPF	M15749.metal.pos.txt.gz	G	A	G	A	0.2495	0.002	0.2942	0.292	0.0304576	0.006	2.57551e-16	0.7389	23506	4570	0.00284664	67.0983
1813	rs12753958	IPF	M15749.metal.pos.txt.gz	G	T	G	T	-0.1753	0.0084	0.8151	0.8576	0.0349894	0.0067	5.44049e-07	0.2145	24589	5829	0.00101978	25.099
1814	rs2076295	IPF	M15749.metal.pos.txt.gz	G	T	G	T	0.3966	0.0026	0.4145	0.4435	0.0270852	0.0045	1.49989e-48	0.556	24589	5829	0.00864432	214.391
1815	rs2197025	IPF	M15749.metal.pos.txt.gz	G	A	G	A	-0.144	-0.0082	0.4483	0.4883	0.0276121	0.0052	1.83716e-07	0.1147	24589	5829	0.00110485	27.1951
1816	rs2609259	IPF	M15749.metal.pos.txt.gz	C	A	C	A	-0.2642	0.0061	0.7654	0.7833	0.0316169	0.0053	6.4725e-17	0.2507	24589	5829	0.00283174	69.8218
1817	rs2967465	IPF	M15749.metal.pos.txt.gz	G	A	G	A	-0.2037	0.0024	0.1113	0.132	0.0407858	0.0064	5.90247e-07	0.706	24589	5829	0.0010134	24.9418
1818	rs3808803	IPF	M15749.metal.pos.txt.gz	C	T	C	T	-0.1278	0.0009	0.5358	0.5549	0.0272959	0.0044	2.8407e-06	0.8475	24589	5829	0.000890712	21.9195
1819	rs4233306	IPF	M15749.metal.pos.txt.gz	C	T	C	T	0.2068	0.0067	0.7913	0.8018	0.0349894	0.0054	3.41357e-09	0.211	24589	5829	0.00141864	34.9295
1820	rs4642211	IPF	M15749.metal.pos.txt.gz	C	T	C	T	-0.1422	0.0069	0.3539	0.364	0.0285606	0.0045	6.39523e-07	0.122	24589	5829	0.00100713	24.7873
1821	rs6560861	IPF	M15749.metal.pos.txt.gz	G	A	G	A	0.1636	-0.0036	0.1928	0.1825	0.0346732	0.0055	2.3778e-06	0.5115	24589	5829	0.000904574	22.2609
1822	rs6786378	IPF	M15749.metal.pos.txt.gz	C	A	C	A	-0.1786	0.0039	0.159	0.1488	0.0384673	0.0062	3.43537e-06	0.5256	24589	5829	0.000875909	21.5549
1823	rs7100920	IPF	M15749.metal.pos.txt.gz	C	T	C	T	-0.1744	0.0027	0.4612	0.5053	0.0272959	0.0045	1.66726e-10	0.5503	24589	5829	0.00165743	40.8189
1824	rs7138541	IPF	M15749.metal.pos.txt.gz	G	A	G	A	-0.1298	0.0017	0.3986	0.4032	0.0280337	0.0044	3.65408e-06	0.7089	24589	5829	0.000871104	21.4365
1825	rs751709	IPF	M15749.metal.pos.txt.gz	G	T	G	T	0.4781	-0.0567	0.9761	0.9815	0.100858	0.052	2.13372e-06	0.2752	24589	1259	0.000913018	22.4689
1826	rs757918	IPF	M15749.metal.pos.txt.gz	C	T	C	T	0.1254	-0.011	0.4503	0.4995	0.0272959	0.0045	4.34644e-06	0.01376	24589	5829	0.000857601	21.1039
1827	rs9860874	IPF	M15749.metal.pos.txt.gz	C	A	C	A	-0.2572	-0.0024	0.7356	0.7495	0.0298253	0.0053	6.49092e-18	0.6442	24589	5829	0.00301523	74.3596
1828	rs10967305	IPF	M15753.metal.pos.txt.gz	C	T	C	T	-0.1437	-0.0039	0.4135	0.4081	0.0276121	0.0051	1.94795e-07	0.447	24589	7357	0.00110026	27.0819
1829	rs11073517	IPF	M15753.metal.pos.txt.gz	C	T	C	T	-0.175	0.0002	0.7296	0.6747	0.0288768	0.0052	1.35927e-09	0.9688	24589	7357	0.00149138	36.7234
1830	rs1123573	IPF	M15753.metal.pos.txt.gz	G	A	G	A	-0.1327	0.0011	0.3867	0.3901	0.0282445	0.0052	2.62378e-06	0.8313	24589	7357	0.000896902	22.0719
1831	rs11788059	IPF	M15753.metal.pos.txt.gz	C	T	C	T	0.1547	0.003	0.3648	0.3252	0.0283498	0.0052	4.84737e-08	0.5678	24589	7357	0.00120952	29.7745
1832	rs1214759	IPF	M15753.metal.pos.txt.gz	G	A	G	A	0.1652	-0.0009	0.6292	0.6733	0.0292984	0.0052	1.71495e-08	0.8589	24589	7357	0.00129131	31.7906
1833	rs12610495	IPF	M15753.metal.pos.txt.gz	G	A	G	A	0.2495	-0.012	0.2942	0.292	0.0304576	0.007	2.57551e-16	0.08648	23506	5599	0.00284664	67.0983
1834	rs12753958	IPF	M15753.metal.pos.txt.gz	G	T	G	T	-0.1753	-0.0053	0.8151	0.8566	0.0349894	0.0074	5.44049e-07	0.4762	24589	7357	0.00101978	25.099
1835	rs2076295	IPF	M15753.metal.pos.txt.gz	G	T	G	T	0.3966	0.0007	0.4145	0.4461	0.0270852	0.0052	1.49989e-48	0.8958	24589	7357	0.00864432	214.391
1836	rs2197025	IPF	M15753.metal.pos.txt.gz	G	A	G	A	-0.144	-0.0054	0.4483	0.4879	0.0276121	0.0058	1.83716e-07	0.3545	24589	7357	0.00110485	27.1951
1837	rs2609259	IPF	M15753.metal.pos.txt.gz	C	A	C	A	-0.2642	0.0046	0.7654	0.7831	0.0316169	0.006	6.4725e-17	0.4453	24589	7357	0.00283174	69.8218
1838	rs2967465	IPF	M15753.metal.pos.txt.gz	G	A	G	A	-0.2037	-0.0067	0.1113	0.1316	0.0407858	0.0071	5.90247e-07	0.351	24589	7357	0.0010134	24.9418
1839	rs3808803	IPF	M15753.metal.pos.txt.gz	C	T	C	T	-0.1278	0.0065	0.5358	0.5517	0.0272959	0.0051	2.8407e-06	0.2034	24589	7357	0.000890712	21.9195
1840	rs4233306	IPF	M15753.metal.pos.txt.gz	C	T	C	T	0.2068	0.0002	0.7913	0.8016	0.0349894	0.0061	3.41357e-09	0.9749	24589	7357	0.00141864	34.9295
1841	rs4642211	IPF	M15753.metal.pos.txt.gz	C	T	C	T	-0.1422	0.0027	0.3539	0.3614	0.0285606	0.0052	6.39523e-07	0.5975	24589	7357	0.00100713	24.7873
1842	rs6560861	IPF	M15753.metal.pos.txt.gz	G	A	G	A	0.1636	-0.0021	0.1928	0.1832	0.0346732	0.0062	2.3778e-06	0.733	24589	7357	0.000904574	22.2609
1843	rs6786378	IPF	M15753.metal.pos.txt.gz	C	A	C	A	-0.1786	0.0104	0.159	0.1471	0.0384673	0.007	3.43537e-06	0.1353	24589	7357	0.000875909	21.5549
1844	rs7100920	IPF	M15753.metal.pos.txt.gz	C	T	C	T	-0.1744	-0.002	0.4612	0.5071	0.0272959	0.0052	1.66726e-10	0.692	24589	7357	0.00165743	40.8189
1845	rs7138541	IPF	M15753.metal.pos.txt.gz	G	A	G	A	-0.1298	0.0011	0.3986	0.4056	0.0280337	0.0051	3.65408e-06	0.8322	24589	7357	0.000871104	21.4365
1846	rs751709	IPF	M15753.metal.pos.txt.gz	G	T	G	T	0.4781	-0.0853	0.9761	0.9812	0.100858	0.0527	2.13372e-06	0.1053	24589	1758	0.000913018	22.4689
1847	rs757918	IPF	M15753.metal.pos.txt.gz	C	T	C	T	0.1254	-0.0103	0.4503	0.4989	0.0272959	0.0052	4.34644e-06	0.04708	24589	7357	0.000857601	21.1039
1848	rs9860874	IPF	M15753.metal.pos.txt.gz	C	A	C	A	-0.2572	-0.0051	0.7356	0.747	0.0298253	0.0059	6.49092e-18	0.3934	24589	7357	0.00301523	74.3596
1849	rs10967305	IPF	M15778.metal.pos.txt.gz	C	T	C	T	-0.1437	-0.0016	0.4135	0.408	0.0276121	0.0018	1.94795e-07	0.3729	24589	7308	0.00110026	27.0819
1850	rs11073517	IPF	M15778.metal.pos.txt.gz	C	T	C	T	-0.175	-0.0018	0.7296	0.6723	0.0288768	0.0018	1.35927e-09	0.3215	24589	7308	0.00149138	36.7234
1851	rs1123573	IPF	M15778.metal.pos.txt.gz	G	A	G	A	-0.1327	-0.0032	0.3867	0.3896	0.0282445	0.0018	2.62378e-06	0.07698	24589	7308	0.000896902	22.0719
1852	rs11788059	IPF	M15778.metal.pos.txt.gz	C	T	C	T	0.1547	0.0032	0.3648	0.3259	0.0283498	0.0018	4.84737e-08	0.08067	24589	7308	0.00120952	29.7745
1853	rs1214759	IPF	M15778.metal.pos.txt.gz	G	A	G	A	0.1652	-0.001	0.6292	0.6749	0.0292984	0.0018	1.71495e-08	0.5968	24589	7308	0.00129131	31.7906
1854	rs12610495	IPF	M15778.metal.pos.txt.gz	G	A	G	A	0.2495	-0.002	0.2942	0.292	0.0304576	0.003	2.57551e-16	0.505	23506	5558	0.00284664	67.0983
1855	rs12753958	IPF	M15778.metal.pos.txt.gz	G	T	G	T	-0.1753	-0.0005	0.8151	0.8631	0.0349894	0.0026	5.44049e-07	0.8539	24589	7308	0.00101978	25.099
1856	rs2076295	IPF	M15778.metal.pos.txt.gz	G	T	G	T	0.3966	-0.0018	0.4145	0.4449	0.0270852	0.0018	1.49989e-48	0.3187	24589	7308	0.00864432	214.391
1857	rs2197025	IPF	M15778.metal.pos.txt.gz	G	A	G	A	-0.144	0.0039	0.4483	0.488	0.0276121	0.0018	1.83716e-07	0.03147	24589	7308	0.00110485	27.1951
1858	rs2609259	IPF	M15778.metal.pos.txt.gz	C	A	C	A	-0.2642	-0.0066	0.7654	0.7836	0.0316169	0.0018	6.4725e-17	0.0003605	24589	7308	0.00283174	69.8218
1859	rs2967465	IPF	M15778.metal.pos.txt.gz	G	A	G	A	-0.2037	-0.0042	0.1113	0.132	0.0407858	0.0027	5.90247e-07	0.1265	24589	7308	0.0010134	24.9418
1860	rs3808803	IPF	M15778.metal.pos.txt.gz	C	T	C	T	-0.1278	-0.0038	0.5358	0.5524	0.0272959	0.0018	2.8407e-06	0.03286	24589	7308	0.000890712	21.9195
1861	rs4233306	IPF	M15778.metal.pos.txt.gz	C	T	C	T	0.2068	0.0022	0.7913	0.8013	0.0349894	0.0019	3.41357e-09	0.2414	24589	7308	0.00141864	34.9295
1862	rs4642211	IPF	M15778.metal.pos.txt.gz	C	T	C	T	-0.1422	-0.0016	0.3539	0.3641	0.0285606	0.0018	6.39523e-07	0.3748	24589	7308	0.00100713	24.7873
1863	rs6560861	IPF	M15778.metal.pos.txt.gz	G	A	G	A	0.1636	-0.0011	0.1928	0.183	0.0346732	0.0026	2.3778e-06	0.6852	24589	7308	0.000904574	22.2609
1864	rs6786378	IPF	M15778.metal.pos.txt.gz	C	A	C	A	-0.1786	-0.0028	0.159	0.1472	0.0384673	0.0027	3.43537e-06	0.2925	24589	7308	0.000875909	21.5549
1865	rs7100920	IPF	M15778.metal.pos.txt.gz	C	T	C	T	-0.1744	-0.0006	0.4612	0.5062	0.0272959	0.0018	1.66726e-10	0.7504	24589	7308	0.00165743	40.8189
1866	rs7138541	IPF	M15778.metal.pos.txt.gz	G	A	G	A	-0.1298	0.0011	0.3986	0.4022	0.0280337	0.0018	3.65408e-06	0.5475	24589	7308	0.000871104	21.4365
1867	rs751709	IPF	M15778.metal.pos.txt.gz	G	T	G	T	0.4781	0.006	0.9761	0.9813	0.100858	0.0215	2.13372e-06	0.7785	24589	1750	0.000913018	22.4689
1868	rs757918	IPF	M15778.metal.pos.txt.gz	C	T	C	T	0.1254	-0.0014	0.4503	0.5002	0.0272959	0.0018	4.34644e-06	0.4384	24589	7308	0.000857601	21.1039
1869	rs9860874	IPF	M15778.metal.pos.txt.gz	C	A	C	A	-0.2572	-0.0029	0.7356	0.748	0.0298253	0.0018	6.49092e-18	0.1119	24589	7308	0.00301523	74.3596
1870	rs10967305	IPF	M15958.metal.pos.txt.gz	C	T	C	T	-0.1437	-0.0044	0.4135	0.4089	0.0276121	0.0038	1.94795e-07	0.2435	24589	4538	0.00110026	27.0819
1871	rs11073517	IPF	M15958.metal.pos.txt.gz	C	T	C	T	-0.175	-0.0008	0.7296	0.671	0.0288768	0.0039	1.35927e-09	0.8444	24589	4538	0.00149138	36.7234
1872	rs1123573	IPF	M15958.metal.pos.txt.gz	G	A	G	A	-0.1327	-0.0068	0.3867	0.3919	0.0282445	0.0038	2.62378e-06	0.07569	24589	4538	0.000896902	22.0719
1873	rs11788059	IPF	M15958.metal.pos.txt.gz	C	T	C	T	0.1547	-0.0004	0.3648	0.325	0.0283498	0.0038	4.84737e-08	0.9216	24589	4538	0.00120952	29.7745
1874	rs1214759	IPF	M15958.metal.pos.txt.gz	G	A	G	A	0.1652	-0.006	0.6292	0.6742	0.0292984	0.0038	1.71495e-08	0.1166	24589	4538	0.00129131	31.7906
1875	rs12610495	IPF	M15958.metal.pos.txt.gz	G	A	G	A	0.2495	0	0.2942	0.292	0.0304576	0.0053	2.57551e-16	1	23506	3765	0.00284664	67.0983
1876	rs12753958	IPF	M15958.metal.pos.txt.gz	G	T	G	T	-0.1753	-0.0005	0.8151	0.8587	0.0349894	0.0062	5.44049e-07	0.9408	24589	4538	0.00101978	25.099
1877	rs2076295	IPF	M15958.metal.pos.txt.gz	G	T	G	T	0.3966	0.0018	0.4145	0.4421	0.0270852	0.0038	1.49989e-48	0.6407	24589	4538	0.00864432	214.391
1878	rs2197025	IPF	M15958.metal.pos.txt.gz	G	A	G	A	-0.144	-0.0048	0.4483	0.4848	0.0276121	0.0046	1.83716e-07	0.2965	24589	4538	0.00110485	27.1951
1879	rs2609259	IPF	M15958.metal.pos.txt.gz	C	A	C	A	-0.2642	0.0004	0.7654	0.7824	0.0316169	0.0047	6.4725e-17	0.9396	24589	4538	0.00283174	69.8218
1880	rs2967465	IPF	M15958.metal.pos.txt.gz	G	A	G	A	-0.2037	0	0.1113	0.1327	0.0407858	0.0057	5.90247e-07	0.9967	24589	4538	0.0010134	24.9418
1881	rs3808803	IPF	M15958.metal.pos.txt.gz	C	T	C	T	-0.1278	-0.0006	0.5358	0.5493	0.0272959	0.0038	2.8407e-06	0.879	24589	4538	0.000890712	21.9195
1882	rs4233306	IPF	M15958.metal.pos.txt.gz	C	T	C	T	0.2068	0.0065	0.7913	0.8005	0.0349894	0.0048	3.41357e-09	0.174	24589	4538	0.00141864	34.9295
1883	rs4642211	IPF	M15958.metal.pos.txt.gz	C	T	C	T	-0.1422	0.0032	0.3539	0.3642	0.0285606	0.0038	6.39523e-07	0.4034	24589	4538	0.00100713	24.7873
1884	rs6560861	IPF	M15958.metal.pos.txt.gz	G	A	G	A	0.1636	0.0039	0.1928	0.1817	0.0346732	0.0048	2.3778e-06	0.4165	24589	4538	0.000904574	22.2609
1885	rs6786378	IPF	M15958.metal.pos.txt.gz	C	A	C	A	-0.1786	0.0046	0.159	0.1475	0.0384673	0.0056	3.43537e-06	0.4137	24589	4538	0.000875909	21.5549
1886	rs7100920	IPF	M15958.metal.pos.txt.gz	C	T	C	T	-0.1744	-0.0035	0.4612	0.5062	0.0272959	0.0038	1.66726e-10	0.3634	24589	4538	0.00165743	40.8189
1887	rs7138541	IPF	M15958.metal.pos.txt.gz	G	A	G	A	-0.1298	0.0005	0.3986	0.4	0.0280337	0.0038	3.65408e-06	0.8994	24589	4538	0.000871104	21.4365
1888	rs751709	IPF	M15958.metal.pos.txt.gz	G	T	G	T	0.4781	0.0688	0.9761	0.9789	0.100858	0.0409	2.13372e-06	0.0922	24589	773	0.000913018	22.4689
1889	rs757918	IPF	M15958.metal.pos.txt.gz	C	T	C	T	0.1254	-0.0011	0.4503	0.5005	0.0272959	0.0038	4.34644e-06	0.7706	24589	4538	0.000857601	21.1039
1890	rs9860874	IPF	M15958.metal.pos.txt.gz	C	A	C	A	-0.2572	0.0043	0.7356	0.7483	0.0298253	0.0047	6.49092e-18	0.3581	24589	4538	0.00301523	74.3596
1891	rs10967305	IPF	M15990.metal.pos.txt.gz	C	T	C	T	-0.1437	0.0011	0.4135	0.408	0.0276121	0.0026	1.94795e-07	0.6623	24589	6782	0.00110026	27.0819
1892	rs11073517	IPF	M15990.metal.pos.txt.gz	C	T	C	T	-0.175	0.0023	0.7296	0.6772	0.0288768	0.0033	1.35927e-09	0.4951	24589	6782	0.00149138	36.7234
1893	rs1123573	IPF	M15990.metal.pos.txt.gz	G	A	G	A	-0.1327	-0.0005	0.3867	0.3908	0.0282445	0.0033	2.62378e-06	0.8725	24589	6782	0.000896902	22.0719
1894	rs11788059	IPF	M15990.metal.pos.txt.gz	C	T	C	T	0.1547	-0.0019	0.3648	0.3246	0.0283498	0.0033	4.84737e-08	0.5628	24589	6782	0.00120952	29.7745
1895	rs1214759	IPF	M15990.metal.pos.txt.gz	G	A	G	A	0.1652	0.0011	0.6292	0.6713	0.0292984	0.0033	1.71495e-08	0.7284	24589	6782	0.00129131	31.7906
1896	rs12610495	IPF	M15990.metal.pos.txt.gz	G	A	G	A	0.2495	-0.005	0.2942	0.292	0.0304576	0.004	2.57551e-16	0.2113	23506	5026	0.00284664	67.0983
1897	rs12753958	IPF	M15990.metal.pos.txt.gz	G	T	G	T	-0.1753	-0.0085	0.8151	0.8511	0.0349894	0.0046	5.44049e-07	0.06553	24589	6782	0.00101978	25.099
1898	rs2076295	IPF	M15990.metal.pos.txt.gz	G	T	G	T	0.3966	-0.0007	0.4145	0.4455	0.0270852	0.0027	1.49989e-48	0.7844	24589	6782	0.00864432	214.391
1899	rs2197025	IPF	M15990.metal.pos.txt.gz	G	A	G	A	-0.144	0.0006	0.4483	0.4884	0.0276121	0.0033	1.83716e-07	0.8592	24589	6782	0.00110485	27.1951
1900	rs2609259	IPF	M15990.metal.pos.txt.gz	C	A	C	A	-0.2642	0.0057	0.7654	0.783	0.0316169	0.0034	6.4725e-17	0.09529	24589	6782	0.00283174	69.8218
1901	rs2967465	IPF	M15990.metal.pos.txt.gz	G	A	G	A	-0.2037	0.0024	0.1113	0.1308	0.0407858	0.0044	5.90247e-07	0.5834	24589	6782	0.0010134	24.9418
1902	rs3808803	IPF	M15990.metal.pos.txt.gz	C	T	C	T	-0.1278	-0.0049	0.5358	0.5522	0.0272959	0.0026	2.8407e-06	0.06372	24589	6782	0.000890712	21.9195
1903	rs4233306	IPF	M15990.metal.pos.txt.gz	C	T	C	T	0.2068	0.0011	0.7913	0.8014	0.0349894	0.0035	3.41357e-09	0.7462	24589	6782	0.00141864	34.9295
1904	rs4642211	IPF	M15990.metal.pos.txt.gz	C	T	C	T	-0.1422	-0.0005	0.3539	0.3583	0.0285606	0.0033	6.39523e-07	0.8813	24589	6782	0.00100713	24.7873
1905	rs6560861	IPF	M15990.metal.pos.txt.gz	G	A	G	A	0.1636	0.0026	0.1928	0.1831	0.0346732	0.0036	2.3778e-06	0.4602	24589	6782	0.000904574	22.2609
1906	rs6786378	IPF	M15990.metal.pos.txt.gz	C	A	C	A	-0.1786	0.0008	0.159	0.1471	0.0384673	0.0042	3.43537e-06	0.8444	24589	6782	0.000875909	21.5549
1907	rs7100920	IPF	M15990.metal.pos.txt.gz	C	T	C	T	-0.1744	0.0028	0.4612	0.508	0.0272959	0.0033	1.66726e-10	0.3989	24589	6782	0.00165743	40.8189
1908	rs7138541	IPF	M15990.metal.pos.txt.gz	G	A	G	A	-0.1298	-0.0038	0.3986	0.4095	0.0280337	0.0033	3.65408e-06	0.2394	24589	6782	0.000871104	21.4365
1909	rs751709	IPF	M15990.metal.pos.txt.gz	G	T	G	T	0.4781	0.021	0.9761	0.9813	0.100858	0.0297	2.13372e-06	0.4789	24589	1756	0.000913018	22.4689
1910	rs757918	IPF	M15990.metal.pos.txt.gz	C	T	C	T	0.1254	-0.003	0.4503	0.4987	0.0272959	0.0033	4.34644e-06	0.3531	24589	6782	0.000857601	21.1039
1911	rs9860874	IPF	M15990.metal.pos.txt.gz	C	A	C	A	-0.2572	0.0006	0.7356	0.7469	0.0298253	0.0034	6.49092e-18	0.8579	24589	6782	0.00301523	74.3596
1912	rs10967305	IPF	M15996.metal.pos.txt.gz	C	T	C	T	-0.1437	0.0019	0.4135	0.4084	0.0276121	0.0037	1.94795e-07	0.6059	24589	7281	0.00110026	27.0819
1913	rs11073517	IPF	M15996.metal.pos.txt.gz	C	T	C	T	-0.175	0.0004	0.7296	0.6742	0.0288768	0.0038	1.35927e-09	0.9261	24589	7281	0.00149138	36.7234
1914	rs1123573	IPF	M15996.metal.pos.txt.gz	G	A	G	A	-0.1327	0.0001	0.3867	0.3899	0.0282445	0.0038	2.62378e-06	0.9801	24589	7281	0.000896902	22.0719
1915	rs11788059	IPF	M15996.metal.pos.txt.gz	C	T	C	T	0.1547	-0.0098	0.3648	0.3261	0.0283498	0.0038	4.84737e-08	0.009721	24589	7281	0.00120952	29.7745
1916	rs1214759	IPF	M15996.metal.pos.txt.gz	G	A	G	A	0.1652	0.0064	0.6292	0.6738	0.0292984	0.0038	1.71495e-08	0.09047	24589	7281	0.00129131	31.7906
1917	rs12610495	IPF	M15996.metal.pos.txt.gz	G	A	G	A	0.2495	0.004	0.2942	0.292	0.0304576	0.0054	2.57551e-16	0.4581	23506	5560	0.00284664	67.0983
1918	rs12753958	IPF	M15996.metal.pos.txt.gz	G	T	G	T	-0.1753	-0.0031	0.8151	0.8533	0.0349894	0.006	5.44049e-07	0.5989	24589	7281	0.00101978	25.099
1919	rs2076295	IPF	M15996.metal.pos.txt.gz	G	T	G	T	0.3966	0.0021	0.4145	0.4463	0.0270852	0.0038	1.49989e-48	0.5799	24589	7281	0.00864432	214.391
1920	rs2197025	IPF	M15996.metal.pos.txt.gz	G	A	G	A	-0.144	0.0014	0.4483	0.4878	0.0276121	0.0045	1.83716e-07	0.7594	24589	7281	0.00110485	27.1951
1921	rs2609259	IPF	M15996.metal.pos.txt.gz	C	A	C	A	-0.2642	-0.0006	0.7654	0.7833	0.0316169	0.0046	6.4725e-17	0.9045	24589	7281	0.00283174	69.8218
1922	rs2967465	IPF	M15996.metal.pos.txt.gz	G	A	G	A	-0.2037	-0.0031	0.1113	0.1313	0.0407858	0.0057	5.90247e-07	0.5841	24589	7281	0.0010134	24.9418
1923	rs3808803	IPF	M15996.metal.pos.txt.gz	C	T	C	T	-0.1278	-0.0071	0.5358	0.5518	0.0272959	0.0037	2.8407e-06	0.05683	24589	7281	0.000890712	21.9195
1924	rs4233306	IPF	M15996.metal.pos.txt.gz	C	T	C	T	0.2068	0.0027	0.7913	0.8014	0.0349894	0.0047	3.41357e-09	0.5627	24589	7281	0.00141864	34.9295
1925	rs4642211	IPF	M15996.metal.pos.txt.gz	C	T	C	T	-0.1422	-0.0034	0.3539	0.3623	0.0285606	0.0038	6.39523e-07	0.374	24589	7281	0.00100713	24.7873
1926	rs6560861	IPF	M15996.metal.pos.txt.gz	G	A	G	A	0.1636	0.0047	0.1928	0.1832	0.0346732	0.0048	2.3778e-06	0.3286	24589	7281	0.000904574	22.2609
1927	rs6786378	IPF	M15996.metal.pos.txt.gz	C	A	C	A	-0.1786	-0.001	0.159	0.1472	0.0384673	0.0055	3.43537e-06	0.8613	24589	7281	0.000875909	21.5549
1928	rs7100920	IPF	M15996.metal.pos.txt.gz	C	T	C	T	-0.1744	0.0014	0.4612	0.507	0.0272959	0.0038	1.66726e-10	0.7144	24589	7281	0.00165743	40.8189
1929	rs7138541	IPF	M15996.metal.pos.txt.gz	G	A	G	A	-0.1298	0.0012	0.3986	0.4048	0.0280337	0.0037	3.65408e-06	0.7553	24589	7281	0.000871104	21.4365
1930	rs751709	IPF	M15996.metal.pos.txt.gz	G	T	G	T	0.4781	-0.0275	0.9761	0.9813	0.100858	0.0399	2.13372e-06	0.49	24589	1721	0.000913018	22.4689
1931	rs757918	IPF	M15996.metal.pos.txt.gz	C	T	C	T	0.1254	-0.0015	0.4503	0.4992	0.0272959	0.0038	4.34644e-06	0.6978	24589	7281	0.000857601	21.1039
1932	rs9860874	IPF	M15996.metal.pos.txt.gz	C	A	C	A	-0.2572	0.0033	0.7356	0.7462	0.0298253	0.0045	6.49092e-18	0.4664	24589	7281	0.00301523	74.3596
1933	rs10967305	IPF	M16634.metal.pos.txt.gz	C	T	C	T	-0.1437	0.0019	0.4135	0.4083	0.0276121	0.0042	1.94795e-07	0.657	24589	7064	0.00110026	27.0819
1934	rs11073517	IPF	M16634.metal.pos.txt.gz	C	T	C	T	-0.175	0.0031	0.7296	0.678	0.0288768	0.0049	1.35927e-09	0.5346	24589	7064	0.00149138	36.7234
1935	rs1123573	IPF	M16634.metal.pos.txt.gz	G	A	G	A	-0.1327	-0.0049	0.3867	0.3907	0.0282445	0.0043	2.62378e-06	0.2557	24589	7064	0.000896902	22.0719
1936	rs11788059	IPF	M16634.metal.pos.txt.gz	C	T	C	T	0.1547	-0.0054	0.3648	0.3242	0.0283498	0.0049	4.84737e-08	0.2715	24589	7064	0.00120952	29.7745
1937	rs1214759	IPF	M16634.metal.pos.txt.gz	G	A	G	A	0.1652	0.003	0.6292	0.6709	0.0292984	0.0049	1.71495e-08	0.5436	24589	7064	0.00129131	31.7906
1938	rs12610495	IPF	M16634.metal.pos.txt.gz	G	A	G	A	0.2495	-0.004	0.2942	0.292	0.0304576	0.007	2.57551e-16	0.5677	23506	5315	0.00284664	67.0983
1939	rs12753958	IPF	M16634.metal.pos.txt.gz	G	T	G	T	-0.1753	0	0.8151	0.8492	0.0349894	0.0068	5.44049e-07	0.9995	24589	7064	0.00101978	25.099
1940	rs2076295	IPF	M16634.metal.pos.txt.gz	G	T	G	T	0.3966	0.0015	0.4145	0.4463	0.0270852	0.0043	1.49989e-48	0.7206	24589	7064	0.00864432	214.391
1941	rs2197025	IPF	M16634.metal.pos.txt.gz	G	A	G	A	-0.144	-0.0024	0.4483	0.4881	0.0276121	0.0054	1.83716e-07	0.6615	24589	7064	0.00110485	27.1951
1942	rs2609259	IPF	M16634.metal.pos.txt.gz	C	A	C	A	-0.2642	-0.0005	0.7654	0.7829	0.0316169	0.0051	6.4725e-17	0.9219	24589	7064	0.00283174	69.8218
1943	rs2967465	IPF	M16634.metal.pos.txt.gz	G	A	G	A	-0.2037	-0.0027	0.1113	0.13	0.0407858	0.0068	5.90247e-07	0.6921	24589	7064	0.0010134	24.9418
1944	rs3808803	IPF	M16634.metal.pos.txt.gz	C	T	C	T	-0.1278	0.0024	0.5358	0.5512	0.0272959	0.0042	2.8407e-06	0.5652	24589	7064	0.000890712	21.9195
1945	rs4233306	IPF	M16634.metal.pos.txt.gz	C	T	C	T	0.2068	-0.0002	0.7913	0.8015	0.0349894	0.0058	3.41357e-09	0.9717	24589	7064	0.00141864	34.9295
1946	rs4642211	IPF	M16634.metal.pos.txt.gz	C	T	C	T	-0.1422	-0.0001	0.3539	0.3572	0.0285606	0.0049	6.39523e-07	0.9783	24589	7064	0.00100713	24.7873
1947	rs6560861	IPF	M16634.metal.pos.txt.gz	G	A	G	A	0.1636	0.0084	0.1928	0.1827	0.0346732	0.0059	2.3778e-06	0.1553	24589	7064	0.000904574	22.2609
1948	rs6786378	IPF	M16634.metal.pos.txt.gz	C	A	C	A	-0.1786	-0.0142	0.159	0.1468	0.0384673	0.0066	3.43537e-06	0.03062	24589	7064	0.000875909	21.5549
1949	rs7100920	IPF	M16634.metal.pos.txt.gz	C	T	C	T	-0.1744	-0.0004	0.4612	0.5072	0.0272959	0.0043	1.66726e-10	0.922	24589	7064	0.00165743	40.8189
1950	rs7138541	IPF	M16634.metal.pos.txt.gz	G	A	G	A	-0.1298	-0.0083	0.3986	0.4067	0.0280337	0.0042	3.65408e-06	0.05065	24589	7064	0.000871104	21.4365
1951	rs751709	IPF	M16634.metal.pos.txt.gz	G	T	G	T	0.4781	-0.0412	0.9761	0.9816	0.100858	0.0431	2.13372e-06	0.3399	24589	1749	0.000913018	22.4689
1952	rs757918	IPF	M16634.metal.pos.txt.gz	C	T	C	T	0.1254	0.005	0.4503	0.4993	0.0272959	0.0043	4.34644e-06	0.2395	24589	7064	0.000857601	21.1039
1953	rs9860874	IPF	M16634.metal.pos.txt.gz	C	A	C	A	-0.2572	-0.0014	0.7356	0.7469	0.0298253	0.005	6.49092e-18	0.7842	24589	7064	0.00301523	74.3596
1954	rs10967305	IPF	M16816.metal.pos.txt.gz	C	T	C	T	-0.1437	0.0008	0.4135	0.4105	0.0276121	0.0032	1.94795e-07	0.8117	24589	4689	0.00110026	27.0819
1955	rs11073517	IPF	M16816.metal.pos.txt.gz	C	T	C	T	-0.175	0.0002	0.7296	0.6774	0.0288768	0.0033	1.35927e-09	0.9466	24589	4689	0.00149138	36.7234
1956	rs1123573	IPF	M16816.metal.pos.txt.gz	G	A	G	A	-0.1327	0.0023	0.3867	0.389	0.0282445	0.0033	2.62378e-06	0.4806	24589	4689	0.000896902	22.0719
1957	rs11788059	IPF	M16816.metal.pos.txt.gz	C	T	C	T	0.1547	0.0017	0.3648	0.3243	0.0283498	0.0033	4.84737e-08	0.6014	24589	4689	0.00120952	29.7745
1958	rs1214759	IPF	M16816.metal.pos.txt.gz	G	A	G	A	0.1652	0.0032	0.6292	0.6734	0.0292984	0.0033	1.71495e-08	0.3354	24589	4689	0.00129131	31.7906
1959	rs12610495	IPF	M16816.metal.pos.txt.gz	G	A	G	A	0.2495	0.001	0.2942	0.292	0.0304576	0.004	2.57551e-16	0.8026	23506	3445	0.00284664	67.0983
1960	rs12753958	IPF	M16816.metal.pos.txt.gz	G	T	G	T	-0.1753	-0.003	0.8151	0.8509	0.0349894	0.0046	5.44049e-07	0.5127	24589	4689	0.00101978	25.099
1961	rs2076295	IPF	M16816.metal.pos.txt.gz	G	T	G	T	0.3966	0.0054	0.4145	0.4477	0.0270852	0.0033	1.49989e-48	0.1023	24589	4689	0.00864432	214.391
1962	rs2197025	IPF	M16816.metal.pos.txt.gz	G	A	G	A	-0.144	-0.0011	0.4483	0.4874	0.0276121	0.0033	1.83716e-07	0.7449	24589	4689	0.00110485	27.1951
1963	rs2609259	IPF	M16816.metal.pos.txt.gz	C	A	C	A	-0.2642	-0.0045	0.7654	0.7827	0.0316169	0.0034	6.4725e-17	0.1834	24589	4689	0.00283174	69.8218
1964	rs2967465	IPF	M16816.metal.pos.txt.gz	G	A	G	A	-0.2037	0.0038	0.1113	0.1296	0.0407858	0.0044	5.90247e-07	0.3785	24589	4689	0.0010134	24.9418
1965	rs3808803	IPF	M16816.metal.pos.txt.gz	C	T	C	T	-0.1278	-0.0006	0.5358	0.5509	0.0272959	0.0026	2.8407e-06	0.8207	24589	4689	0.000890712	21.9195
1966	rs4233306	IPF	M16816.metal.pos.txt.gz	C	T	C	T	0.2068	-0.0034	0.7913	0.8019	0.0349894	0.0035	3.41357e-09	0.3269	24589	4689	0.00141864	34.9295
1967	rs4642211	IPF	M16816.metal.pos.txt.gz	C	T	C	T	-0.1422	-0.0036	0.3539	0.3572	0.0285606	0.0033	6.39523e-07	0.2691	24589	4689	0.00100713	24.7873
1968	rs6560861	IPF	M16816.metal.pos.txt.gz	G	A	G	A	0.1636	-0.0002	0.1928	0.184	0.0346732	0.0035	2.3778e-06	0.9506	24589	4689	0.000904574	22.2609
1969	rs6786378	IPF	M16816.metal.pos.txt.gz	C	A	C	A	-0.1786	-0.0057	0.159	0.1467	0.0384673	0.0042	3.43537e-06	0.176	24589	4689	0.000875909	21.5549
1970	rs7100920	IPF	M16816.metal.pos.txt.gz	C	T	C	T	-0.1744	-0.0027	0.4612	0.5079	0.0272959	0.0026	1.66726e-10	0.3128	24589	4689	0.00165743	40.8189
1971	rs7138541	IPF	M16816.metal.pos.txt.gz	G	A	G	A	-0.1298	0.0078	0.3986	0.4094	0.0280337	0.0032	3.65408e-06	0.01531	24589	4689	0.000871104	21.4365
1972	rs751709	IPF	M16816.metal.pos.txt.gz	G	T	G	T	0.4781	-0.0286	0.9761	0.9816	0.100858	0.0296	2.13372e-06	0.3339	24589	1244	0.000913018	22.4689
1973	rs757918	IPF	M16816.metal.pos.txt.gz	C	T	C	T	0.1254	0.0052	0.4503	0.4984	0.0272959	0.0026	4.34644e-06	0.05035	24589	4689	0.000857601	21.1039
1974	rs9860874	IPF	M16816.metal.pos.txt.gz	C	A	C	A	-0.2572	0.0053	0.7356	0.745	0.0298253	0.0033	6.49092e-18	0.1104	24589	4689	0.00301523	74.3596
1975	rs10967305	IPF	M16818.metal.pos.txt.gz	C	T	C	T	-0.1437	-0.0025	0.4135	0.409	0.0276121	0.0034	1.94795e-07	0.4612	24589	7055	0.00110026	27.0819
1976	rs11073517	IPF	M16818.metal.pos.txt.gz	C	T	C	T	-0.175	-0.0002	0.7296	0.6762	0.0288768	0.0035	1.35927e-09	0.945	24589	7055	0.00149138	36.7234
1977	rs1123573	IPF	M16818.metal.pos.txt.gz	G	A	G	A	-0.1327	0.0046	0.3867	0.3909	0.0282445	0.0035	2.62378e-06	0.1892	24589	7055	0.000896902	22.0719
1978	rs11788059	IPF	M16818.metal.pos.txt.gz	C	T	C	T	0.1547	0.0051	0.3648	0.3246	0.0283498	0.0035	4.84737e-08	0.148	24589	7055	0.00120952	29.7745
1979	rs1214759	IPF	M16818.metal.pos.txt.gz	G	A	G	A	0.1652	0.005	0.6292	0.6728	0.0292984	0.0035	1.71495e-08	0.156	24589	7055	0.00129131	31.7906
1980	rs12610495	IPF	M16818.metal.pos.txt.gz	G	A	G	A	0.2495	0.004	0.2942	0.292	0.0304576	0.0052	2.57551e-16	0.4408	23506	5385	0.00284664	67.0983
1981	rs12753958	IPF	M16818.metal.pos.txt.gz	G	T	G	T	-0.1753	-0.0004	0.8151	0.8528	0.0349894	0.005	5.44049e-07	0.9315	24589	7055	0.00101978	25.099
1982	rs2076295	IPF	M16818.metal.pos.txt.gz	G	T	G	T	0.3966	-0.0005	0.4145	0.4452	0.0270852	0.0035	1.49989e-48	0.8855	24589	7055	0.00864432	214.391
1983	rs2197025	IPF	M16818.metal.pos.txt.gz	G	A	G	A	-0.144	-0.0003	0.4483	0.4885	0.0276121	0.0035	1.83716e-07	0.9379	24589	7055	0.00110485	27.1951
1984	rs2609259	IPF	M16818.metal.pos.txt.gz	C	A	C	A	-0.2642	-0.0015	0.7654	0.7831	0.0316169	0.0036	6.4725e-17	0.6822	24589	7055	0.00283174	69.8218
1985	rs2967465	IPF	M16818.metal.pos.txt.gz	G	A	G	A	-0.2037	-0.0028	0.1113	0.1316	0.0407858	0.0046	5.90247e-07	0.5399	24589	7055	0.0010134	24.9418
1986	rs3808803	IPF	M16818.metal.pos.txt.gz	C	T	C	T	-0.1278	-0.0013	0.5358	0.5512	0.0272959	0.0035	2.8407e-06	0.7084	24589	7055	0.000890712	21.9195
1987	rs4233306	IPF	M16818.metal.pos.txt.gz	C	T	C	T	0.2068	0.0043	0.7913	0.802	0.0349894	0.0044	3.41357e-09	0.3267	24589	7055	0.00141864	34.9295
1988	rs4642211	IPF	M16818.metal.pos.txt.gz	C	T	C	T	-0.1422	-0.0009	0.3539	0.3598	0.0285606	0.0035	6.39523e-07	0.8069	24589	7055	0.00100713	24.7873
1989	rs6560861	IPF	M16818.metal.pos.txt.gz	G	A	G	A	0.1636	0.0074	0.1928	0.1833	0.0346732	0.0045	2.3778e-06	0.09625	24589	7055	0.000904574	22.2609
1990	rs6786378	IPF	M16818.metal.pos.txt.gz	C	A	C	A	-0.1786	-0.0113	0.159	0.147	0.0384673	0.0045	3.43537e-06	0.01169	24589	7055	0.000875909	21.5549
1991	rs7100920	IPF	M16818.metal.pos.txt.gz	C	T	C	T	-0.1744	0.0062	0.4612	0.5072	0.0272959	0.0035	1.66726e-10	0.07415	24589	7055	0.00165743	40.8189
1992	rs7138541	IPF	M16818.metal.pos.txt.gz	G	A	G	A	-0.1298	-0.0023	0.3986	0.4078	0.0280337	0.0035	3.65408e-06	0.5002	24589	7055	0.000871104	21.4365
1993	rs751709	IPF	M16818.metal.pos.txt.gz	G	T	G	T	0.4781	-0.0436	0.9761	0.9813	0.100858	0.0336	2.13372e-06	0.1945	24589	1670	0.000913018	22.4689
1994	rs757918	IPF	M16818.metal.pos.txt.gz	C	T	C	T	0.1254	-0.0011	0.4503	0.4982	0.0272959	0.0035	4.34644e-06	0.7553	24589	7055	0.000857601	21.1039
1995	rs9860874	IPF	M16818.metal.pos.txt.gz	C	A	C	A	-0.2572	0.0035	0.7356	0.7471	0.0298253	0.0036	6.49092e-18	0.3305	24589	7055	0.00301523	74.3596
1996	rs10967305	IPF	M16821.metal.pos.txt.gz	C	T	C	T	-0.1437	0.0016	0.4135	0.4079	0.0276121	0.0026	1.94795e-07	0.5416	24589	6733	0.00110026	27.0819
1997	rs11073517	IPF	M16821.metal.pos.txt.gz	C	T	C	T	-0.175	-0.0002	0.7296	0.6729	0.0288768	0.0027	1.35927e-09	0.9363	24589	6733	0.00149138	36.7234
1998	rs1123573	IPF	M16821.metal.pos.txt.gz	G	A	G	A	-0.1327	0.0008	0.3867	0.3895	0.0282445	0.0027	2.62378e-06	0.7623	24589	6733	0.000896902	22.0719
[truncated: 8,203 more rows]
